# Supplementary material for: A Pan-Cancer Assessment of RB1/TP53 Co-Mutations
Source: MDPI journal article supplement (doi:10.3390/cancers14174199), 2022-08-30
Supplement: s1 [file s1]

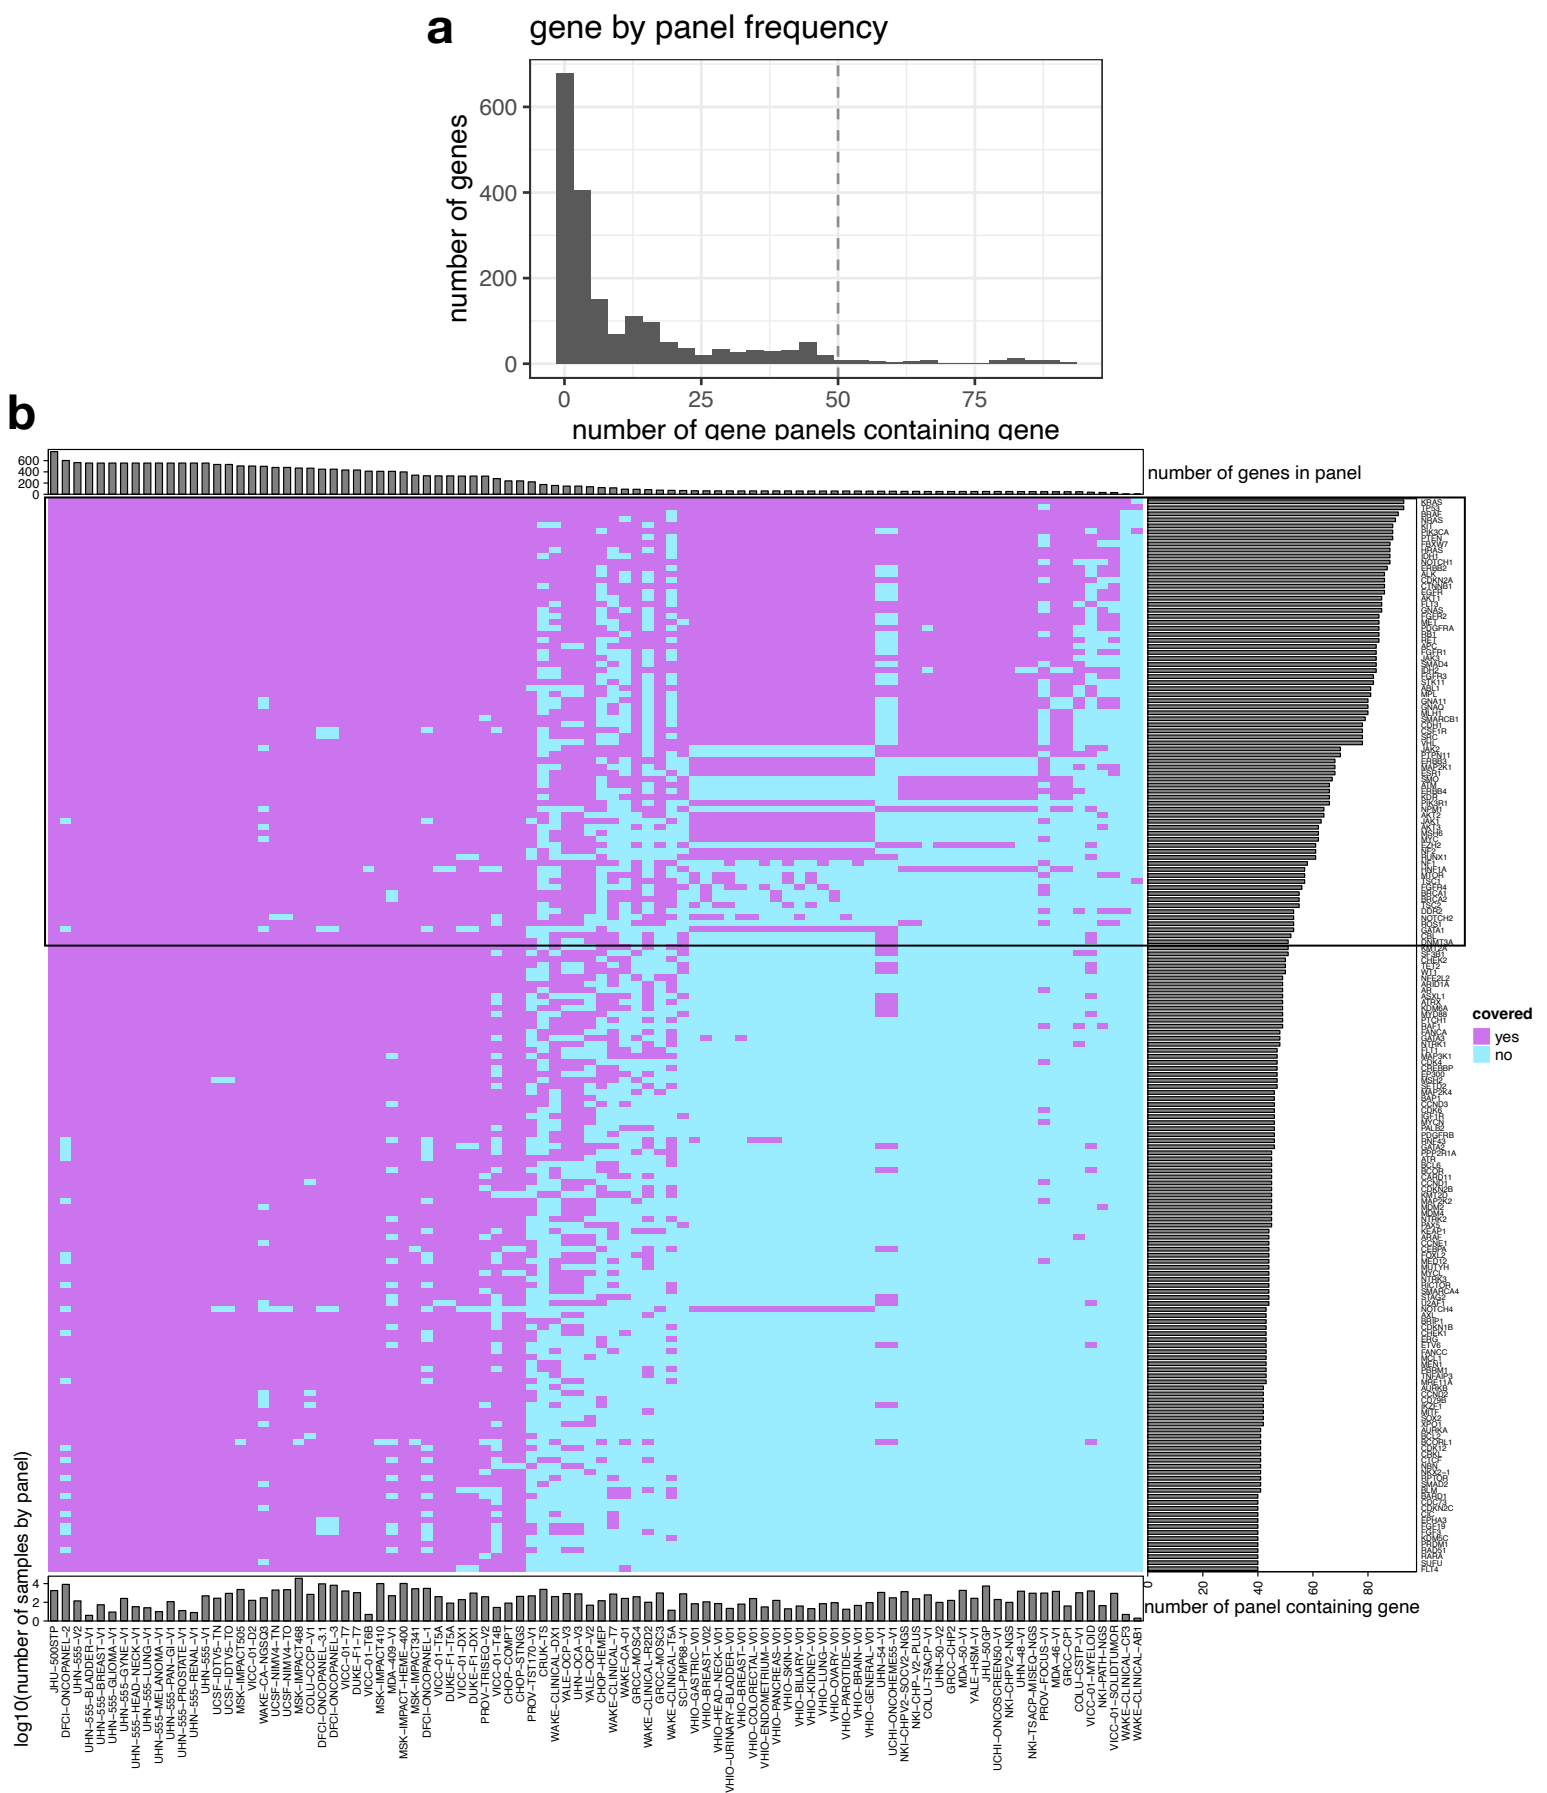

**Figure S1. Selection of genes by gene panel coverage.**  
 The 94 gene panels that feed data into AACR-GENIE have different gene coverage. To avoid bias in co-mutation analysis, we try to select genes that are covered by most panels. **a.** histogram shows the distribution of the number of genes as a function of the number of gene panels containing the gene. We selected 50 as a cut-off (drawn as a dashed line) for our study so that the gene we investigate is covered by over half of the panels. **b.** Assay coverage by gene and panel. This heatmap indicates whether a gene is (purple) or is not (cyan) covered in a specific assay. There are 178 genes covered by at least 40 panels in rows, and all 94 panels from the v11.0 AACR GENIE data in columns. The bar graph on top of the heatmap shows the number of genes covered by each panel. The bar graph on the right shows the number of panels covering each gene. The top part of the heatmap that contains the 74 genes selected by our custom cut-off is enclosed in a rectangle. The bar graph at the bottom shows the number of samples assessed by the assay.

Select gene 1

TP53

Select gene 2

RB1

Count in copy number alterations

☒ no ☐ yes

Display

☒ table ☐ scatter plot

SUBMIT

DOWNLOAD RESULT TABLE

Show 10 entries

Search:

| CANCER_TYPE_DETAILED             | comutant                                       | g1_mutant | g2_mutant | total | co.frac | g1.frac | g2.frac | g1_mut_given_g2_mut | g2_mut_given_g1_mut | co.pv   | exclusive.pv | co.adj  | exclusive.padj | sig.level   | occurrence  |
|----------------------------------|------------------------------------------------|-----------|-----------|-------|---------|---------|---------|---------------------|---------------------|---------|--------------|---------|----------------|-------------|-------------|
| All                              | number of samples with mutations in both genes |           |           |       |         |         |         | All                 | All                 |         |              | All     | All            |             | All         |
| Lung Adenocarcinoma              | 444                                            | 6140      | 562       | 13416 | 0.0331  | 0.4577  | 0.0419  | 0.0723              | 0.79                | 5.1e-61 | 1            | 1.5e-58 | 1              | p.adj < .05 | co-mutation |
| Bladder Urothelial Carcinoma     | 383                                            | 1365      | 478       | 2787  | 0.1374  | 0.4898  | 0.1715  | 0.2806              | 0.8013              | 2.7e-53 | 1            | 4.1e-51 | 1              | p.adj < .05 | co-mutation |
| Merkel Cell Carcinoma            | 79                                             | 97        | 85        | 317   | 0.2492  | 0.306   | 0.2681  | 0.8144              | 0.9294              | 4.5e-49 | 1            | 4.5e-47 | 1              | p.adj < .05 | co-mutation |
| Glioblastoma Multiforme          | 189                                            | 781       | 248       | 2266  | 0.0834  | 0.3447  | 0.1094  | 0.242               | 0.7621              | 2.9e-46 | 1            | 2.2e-44 | 1              | p.adj < .05 | co-mutation |
| Glioblastoma                     | 123                                            | 639       | 156       | 1765  | 0.0697  | 0.362   | 0.0884  | 0.1925              | 0.7885              | 3.9e-30 | 1            | 2.4e-28 | 1              | p.adj < .05 | co-mutation |
| Breast Invasive Ductal Carcinoma | 203                                            | 3816      | 275       | 8694  | 0.0233  | 0.4389  | 0.0316  | 0.0532              | 0.7382              | 1.5e-24 | 1            | 7.4e-23 | 1              | p.adj < .05 | co-mutation |
| Small Cell Lung Cancer           | 362                                            | 546       | 389       | 664   | 0.5452  | 0.8223  | 0.5858  | 0.663               | 0.9306              | 3.5e-18 | 1            | 1.5e-16 | 1              | p.adj < .05 | co-mutation |
| Pancreatic Neuroendocrine Tumor  | 20                                             | 78        | 24        | 522   | 0.0383  | 0.1494  | 0.046   | 0.2564              | 0.8333              | 2.1e-14 | 1            | 7.7e-13 | 1              | p.adj < .05 | co-mutation |
| Melanoma                         | 38                                             | 415       | 72        | 2228  | 0.0171  | 0.1863  | 0.0323  | 0.0916              | 0.5278              | 3.3e-11 | 1            | 1.1e-9  | 1              | p.adj < .05 | co-mutation |
| Cancer of Unknown Primary        | 51                                             | 455       | 63        | 1082  | 0.0471  | 0.4205  | 0.0582  | 0.1121              | 0.8095              | 9e-11   | 1            | 2.7e-9  | 1              | p.adj < .05 | co-mutation |

Showing 1 to 10 of 750 entries

Previous

1

2

3

4

5

...

75

Next

**Figure S2. Screen shots from the “comut” web application for screening result review.** Users can specify a gene pair, and whether to include copy number alterations in mutation for analysis. The resulting table provides mutation counts and frequencies of single and co-mutations, as well p-values from Fisher’s exact test assuming concurrent (co.pv) or mutually exclusive (exclusive.pv) co-mutations. P-values adjusted for multiple comparisons are also provided as “co.padj” or “exclusive.padj”. Table is filterable and downloadable. Full name and explanation of the table header is provided in a tooltip upon mouseover. For example, in this snapshot, tooltip for “comutant” is displayed.

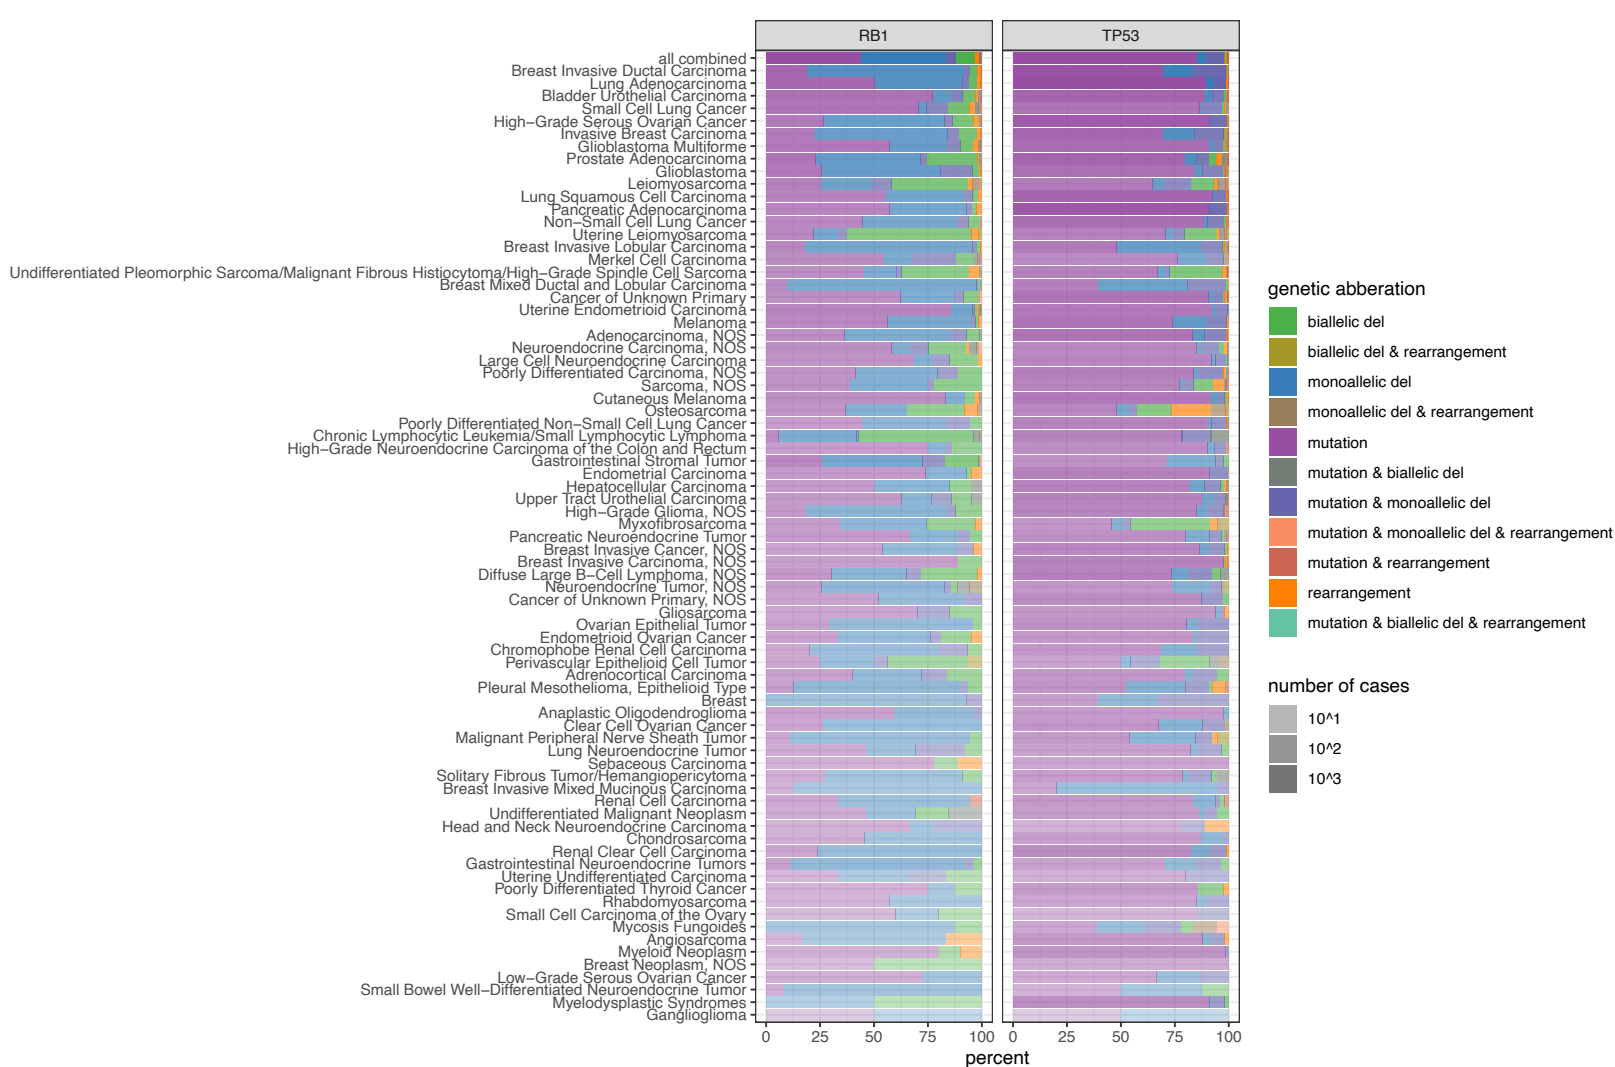

**Figure S3. Genomic aberrations that lead to *RB1* and *TP53* loss by detailed cancer types.** Mutations, copy number alteration, and fusion data were integrated to determine *RB1* and *TP53* loss status. Distribution of the genomic alteration events on *RB1* and *TP53* were plotted for individual detailed cancer types that have significant enrichment of *RB1/TP53* co-mutation. Overall aberration distribution was also added on top of the plot as “all combined”. The detailed cancer types were ordered by the total number of co-mutated cases. The transparency of the stacked bars for each cancer type was determined by the number of cases with *RB1* or *TP53* mutations.

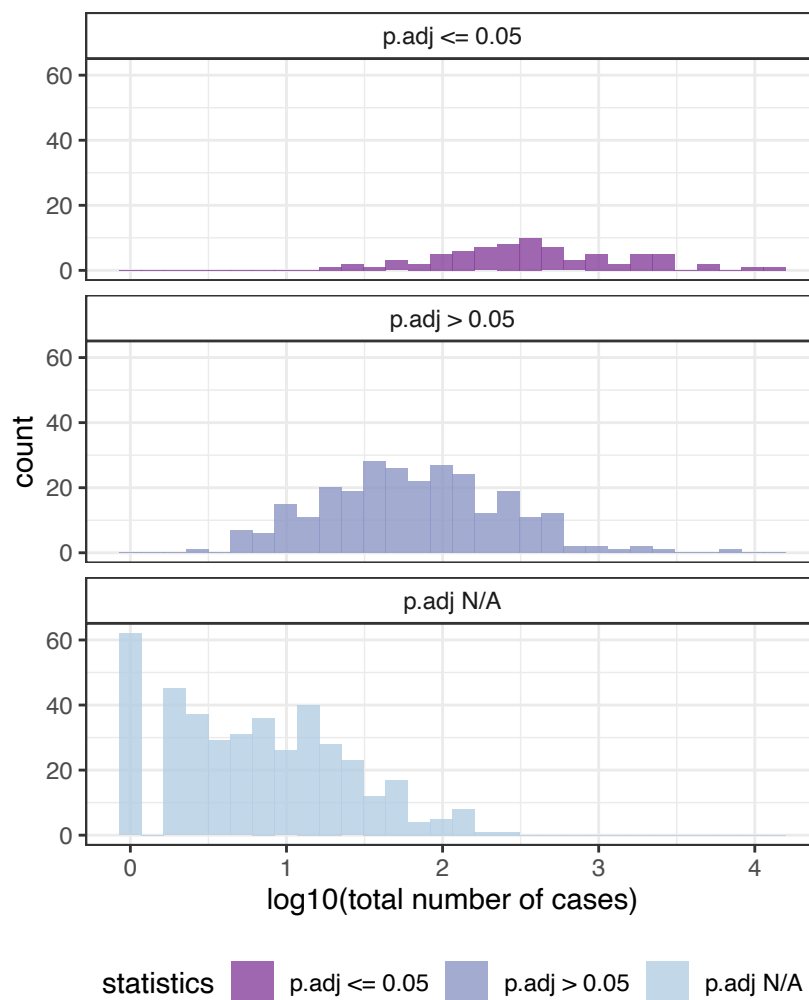

**Figure S4. Co-mutation enrichment tests fail to reach statistical significance in cancer types with small sample sizes.** The distribution of the total number of cases for different cancer types was compared among groups with different statistical significance from co-mutation enrichment tests. The cancer types with statistically insignificant *RB1/TP53* co-mutation enrichment tend to have smaller sample sizes.

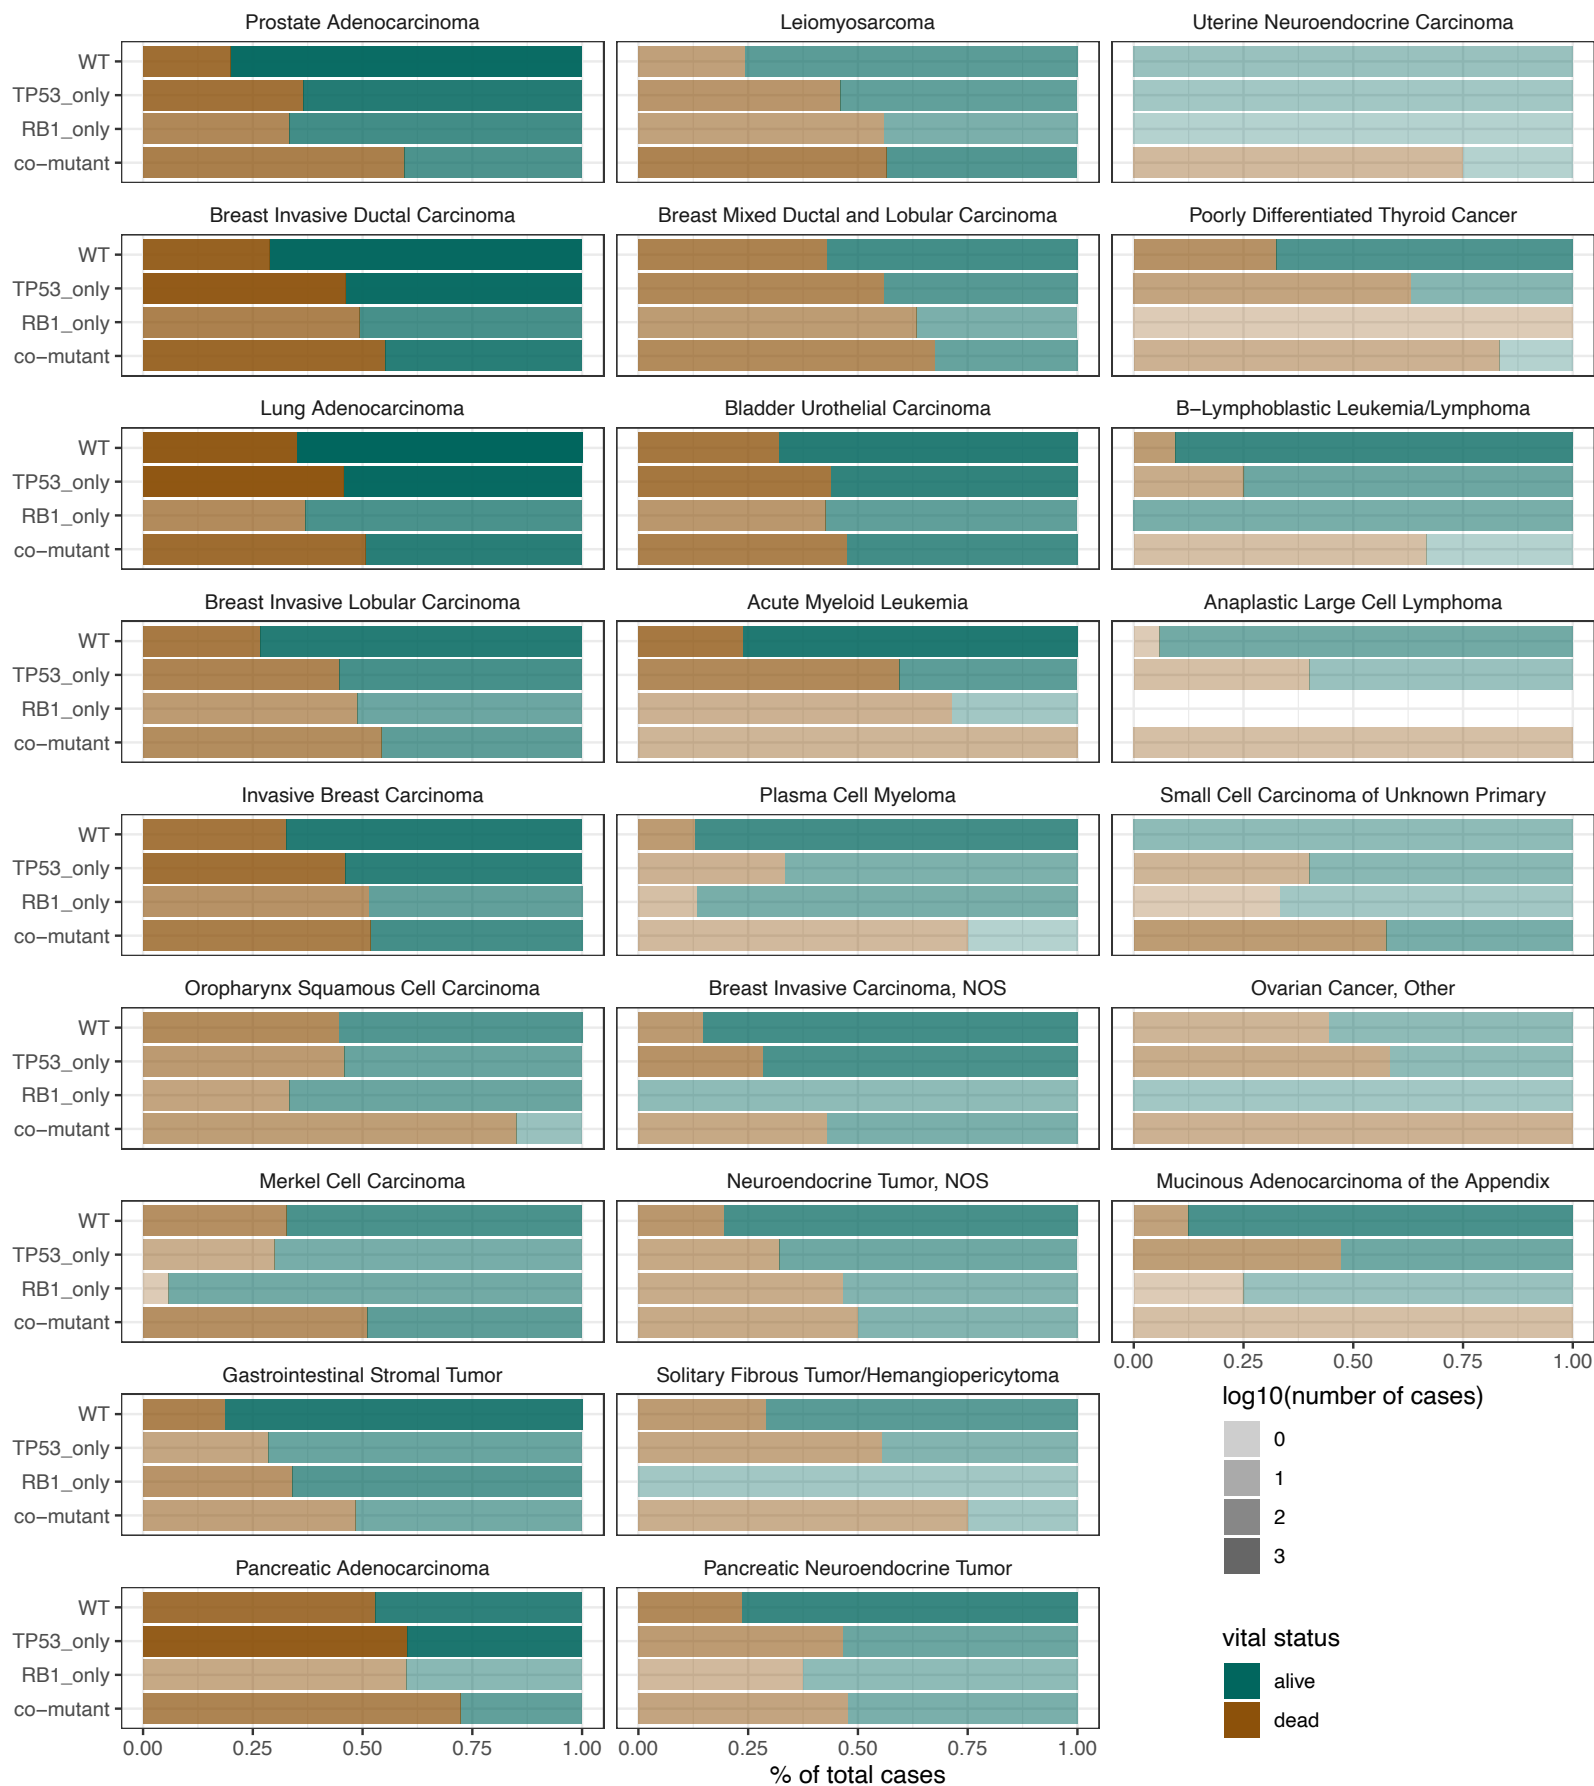

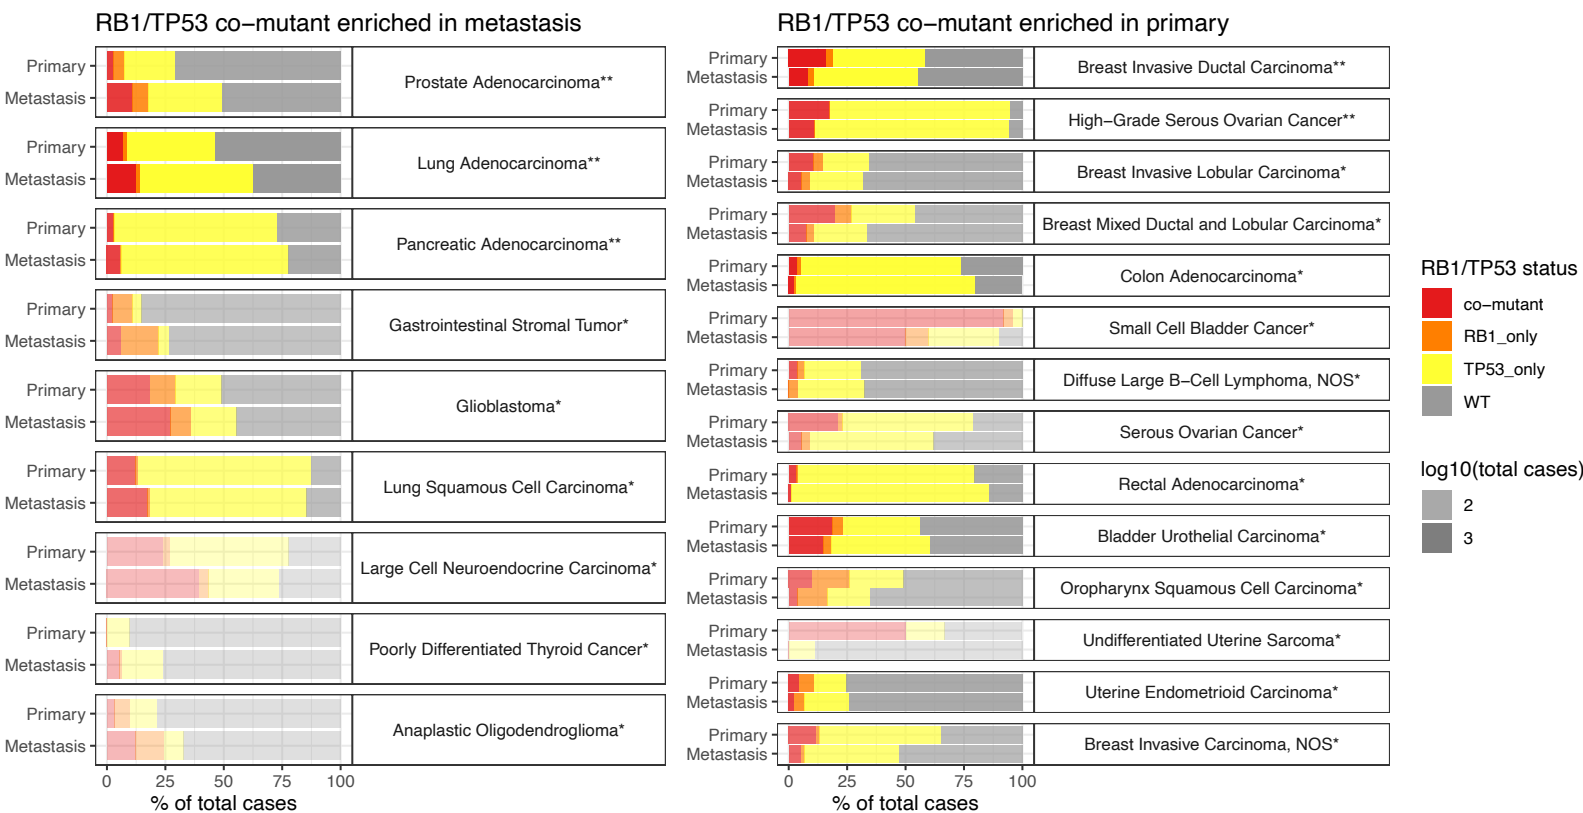

**Figure S6. Association between *RB1/TP53* co-mutations and sample type.** Fisher's exact tests were performed to identify cancer types with *RB1/TP53* co-mutations enriched in metastasis (left) or primary (right) tumors. All hits with a nominal p-value < 0.05 were plotted. The distribution of samples by *RB1/TP53* co-mutation status was visualized as stacked bar plots for each cancer type. P-values were denoted by asterisks (\*\*, adjusted p-value < 0.05, \*, nominal p-value < 0.05)

# CRISPR essentiality score by RB1/TP53 mutation status

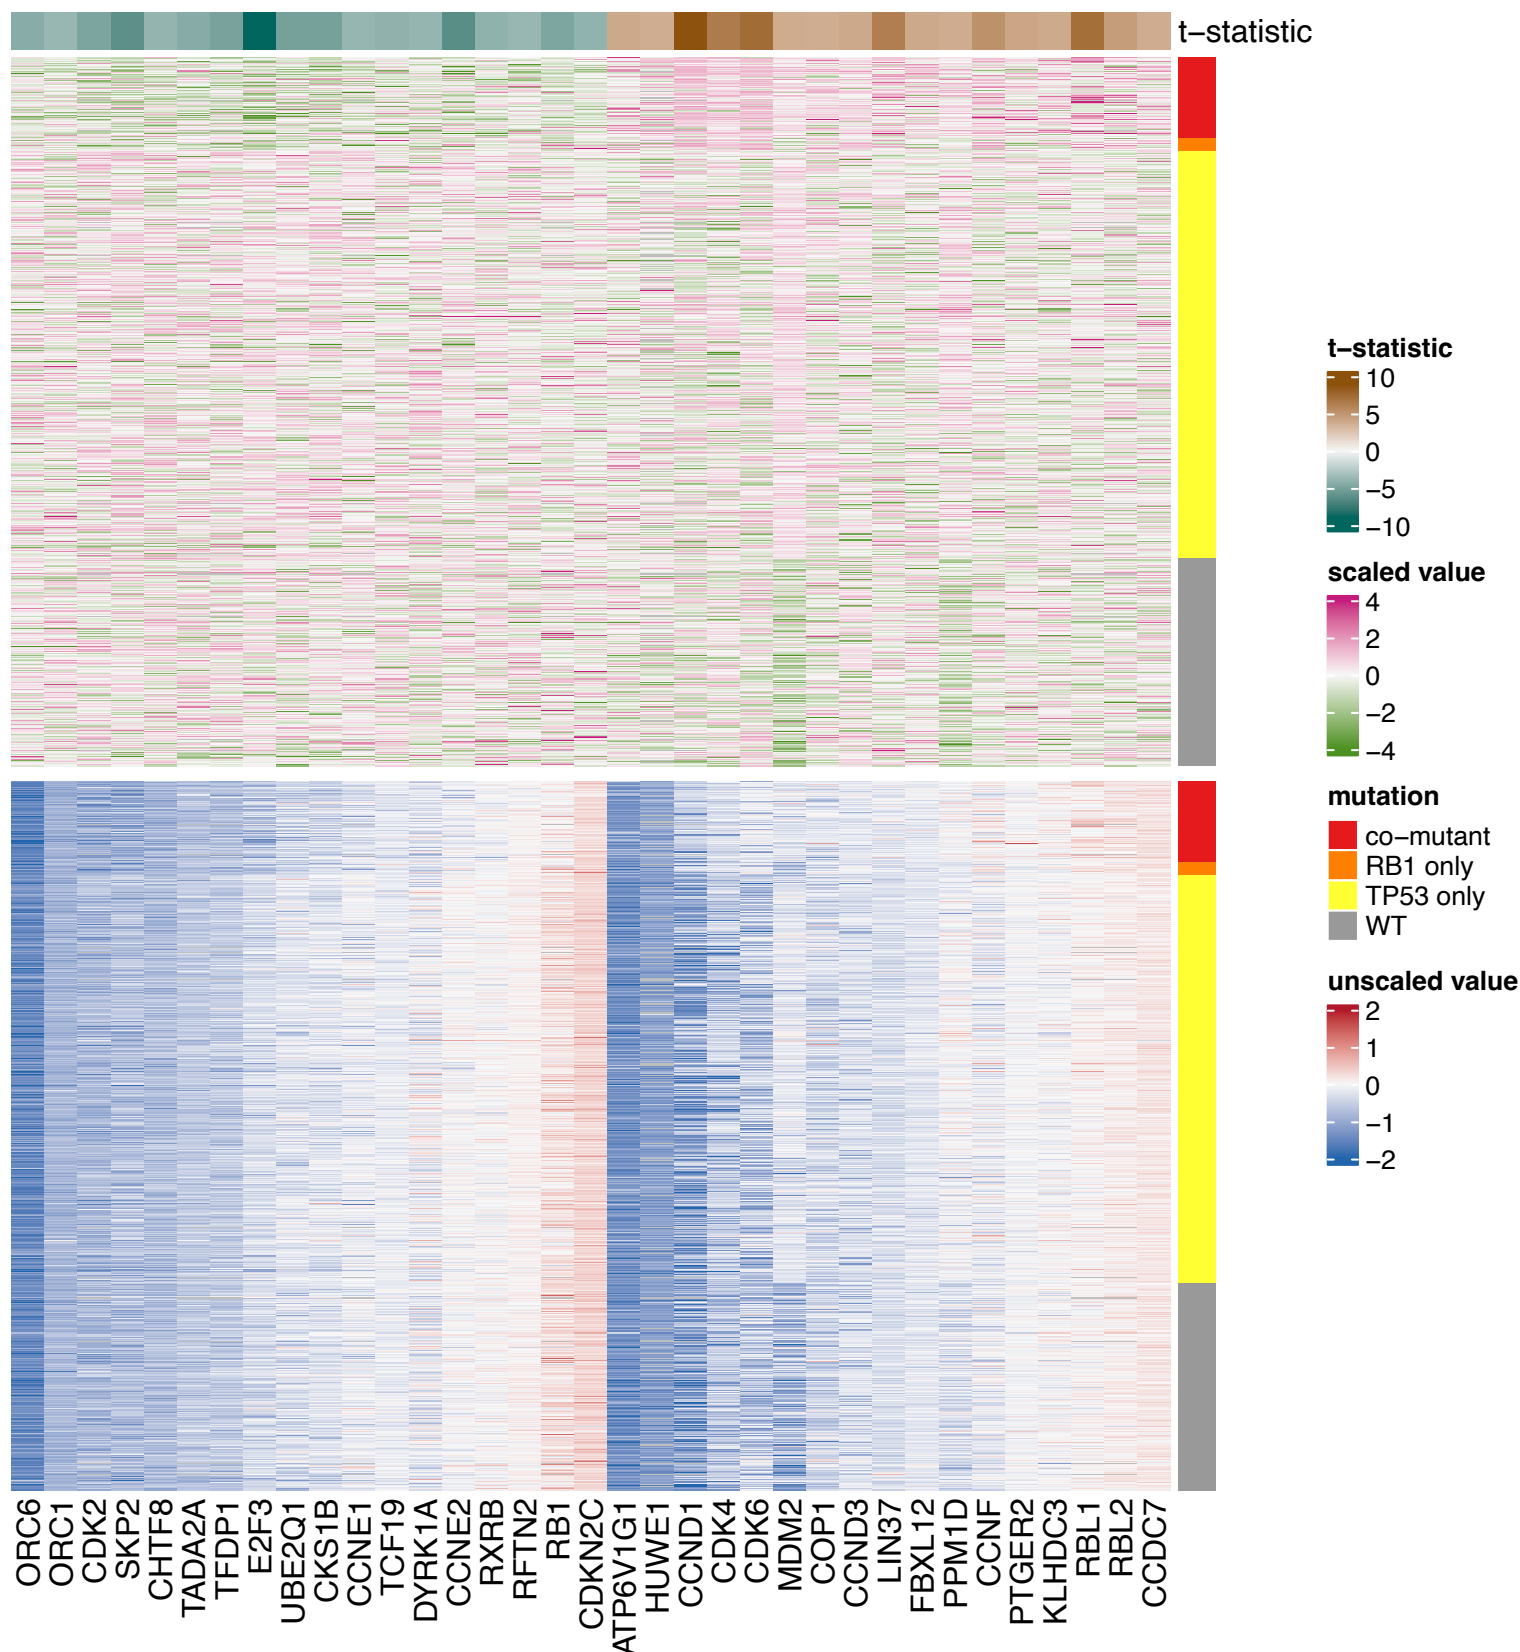

**Figure S7. CRISPR essentiality scores by *RB1/TP53* mutation status for genes from differential CRISPR scores analysis**  
Scaled (z-transformed) gene essentiality scores are plotted in the top half of the heatmap to clarify the contrast between oncogenotypes whereas untransformed scores are plotted in the bottom half for better interpretability. t-statistic from lineage-adjusted linear model comparing co-mutant to WT cell lines are added to the top of the heatmap. Co-mutation status of the cell lines was annotated by the colored column right to the heatmap. Note that for the genes with negative t-values (left half), those with largely negative scores (blue, such as E2F3) are genes that have become more essential to the cell line with co-mutations. For genes with largely positive scores (red, such as RB1), the interpretation should be that cell lines with co-mutations did not gain additional growth advantage with CRISPR KO of such genes. For genes on the right side, those with predominantly negative scores (blue, such as CDK4), are genes that have become less essential to co-mutants, whereas those with predominantly positive scores (red, such as RBL1), are genes that could confer growth advantage when KO in the co-mutant background.
