# Supplementary material for: A Pan-Cancer Assessment of RB1/TP53 Co-Mutations
Source: Cancers (Basel). 2022 Aug 30;14(17):4199. doi: 10.3390/cancers14174199 (PMC9454436; doi:10.3390/cancers14174199)
Supplement: Supplementary file 1 [file cancers-14-04199-s001.zip › Supplementary_Tables.xlsx]

## Sheet: S1
Table S1. Screening results for 2850 gene pairs from 76 cancer genes
co-mutation	total number of cases	number of major cancer types	number of detailed cancer types	total co-mutated cases	number of major cancer types enriched for co-mutation	number of detailed cancer types enriched for co-mutation
ABL1/AKT1	122630	108	743	143	9	9
ABL1/ALK	122385	108	743	355	14	17
ABL1/APC	122644	108	743	524	13	16
ABL1/ATM	121463	108	743	465	13	19
ABL1/BRAF	125833	108	754	370	12	13
ABL1/CDH1	122371	108	743	242	9	16
ABL1/CDKN2A	125574	108	754	237	12	10
ABL1/CSF1R	103446	108	743	182	10	17
ABL1/CTNNB1	122644	108	743	207	6	7
ABL1/EGFR	122630	108	743	319	10	13
ABL1/ERBB2	122630	108	743	250	10	12
ABL1/ERBB4	121190	108	743	382	12	18
ABL1/FBXW7	125833	108	754	371	18	26
ABL1/FGFR1	122371	108	743	189	9	15
ABL1/FGFR2	122630	108	743	236	9	14
ABL1/FGFR3	122371	108	743	269	13	18
ABL1/FLT3	125833	108	754	573	24	37
ABL1/GNA11	120815	108	743	160	12	15
ABL1/GNAQ	120556	108	742	117	11	12
ABL1/GNAS	123819	108	751	220	15	17
ABL1/HNF1A	120286	108	741	223	13	16
ABL1/HRAS	125833	108	754	138	14	14
ABL1/IDH1	125574	108	754	446	20	26
ABL1/JAK2	124365	108	754	349	19	25
ABL1/JAK3	123952	108	753	463	26	34
ABL1/KDR	121463	108	743	354	12	19
ABL1/KIT	125847	108	754	370	21	25
ABL1/KRAS	125847	108	754	523	9	12
ABL1/MET	121843	108	742	306	13	16
ABL1/MLH1	122371	108	743	211	15	20
ABL1/MPL	125574	108	754	161	14	14
ABL1/NOTCH1	124225	108	753	733	28	37
ABL1/NPM1	124092	108	753	313	20	24
ABL1/NRAS	125574	108	754	416	18	25
ABL1/PDGFRA	123590	108	753	548	25	30
ABL1/PIK3CA	122644	108	743	509	10	9
ABL1/PTEN	125833	108	754	402	13	13
ABL1/PTPN11	124652	108	754	185	14	17
ABL1/RB1	122532	108	745	317	10	14
ABL1/RET	122630	108	743	309	15	24
ABL1/SMAD4	122385	108	743	200	8	10
ABL1/SMARCB1	121981	108	742	122	9	12
ABL1/SMO	121449	108	743	254	12	18
ABL1/SRC	106642	108	741	109	11	17
ABL1/STK11	122371	108	743	207	8	9
ABL1/TP53	125847	108	754	1291	15	16
ABL1/VHL	122644	108	743	91	7	8
ABL1/EZH2	119800	108	752	412	21	29
ABL1/IDH2	120995	108	752	279	17	23
ABL1/AKT2	106733	108	732	92	6	7
ABL1/AKT3	106826	108	731	117	10	10
ABL1/BRCA1	106123	108	732	258	14	16
ABL1/BRCA2	106123	108	732	398	14	17
ABL1/DDR2	105995	108	732	194	12	14
ABL1/ERBB3	107176	108	732	233	8	9
ABL1/FGFR4	107150	108	733	191	9	13
ABL1/MAP2K1	107323	108	735	103	4	6
ABL1/MTOR	106460	108	732	344	14	21
ABL1/NF1	106347	108	735	454	13	23
ABL1/NOTCH2	101896	105	720	261	11	14
ABL1/PIK3R1	107323	108	735	220	4	6
ABL1/ROS1	107528	108	736	387	11	17
ABL1/TSC1	106215	108	732	222	8	11
ABL1/TSC2	106215	108	732	274	13	19
ABL1/CBL	108614	104	742	350	21	30
ABL1/DNMT3A	108614	104	742	342	14	18
ABL1/ESR1	106346	104	731	172	8	10
ABL1/JAK1	94670	104	724	231	13	16
ABL1/KMT2A	107216	104	741	474	20	32
ABL1/MSH6	105889	104	731	282	9	20
ABL1/MYC	105490	103	726	88	7	7
ABL1/NF2	105791	104	728	125	6	6
ABL1/SF3B1	108980	104	742	516	22	28
ABL1/GATA1	78591	103	720	64	6	4
ABL1/RUNX1	108585	104	742	459	26	32
AKT1/ALK	130285	111	749	201	9	10
AKT1/APC	126903	110	746	341	9	12
AKT1/ATM	123992	109	747	269	8	6
AKT1/BRAF	130544	111	749	264	8	10
AKT1/CDH1	125685	109	745	204	4	6
AKT1/CDKN2A	128383	110	748	136	5	4
AKT1/CSF1R	105828	109	745	84	8	6
AKT1/CTNNB1	128085	110	748	214	6	9
AKT1/EGFR	130544	111	749	183	10	8
AKT1/ERBB2	130544	111	749	150	3	6
AKT1/ERBB4	128161	111	749	201	8	11
AKT1/FBXW7	128642	110	748	188	4	8
AKT1/FGFR1	127870	110	748	116	8	7
AKT1/FGFR2	127719	110	747	138	8	12
AKT1/FGFR3	127460	110	747	155	7	11
AKT1/FLT3	127178	110	747	130	5	12
AKT1/GNA11	125904	110	747	66	5	7
AKT1/GNAQ	125645	110	746	68	6	8
AKT1/GNAS	126012	109	747	91	6	2
AKT1/HNF1A	122419	109	746	116	6	4
AKT1/HRAS	130134	111	748	71	8	6
AKT1/IDH1	127870	110	748	96	7	5
AKT1/JAK2	124284	110	747	97	4	4
AKT1/JAK3	125873	110	748	154	10	11
AKT1/KDR	123992	109	747	171	9	12
AKT1/KIT	127719	110	747	130	5	7
AKT1/KRAS	130544	111	749	262	3	2
AKT1/MET	127328	110	747	156	6	9
AKT1/MLH1	124914	109	747	118	8	4
AKT1/MPL	123270	108	744	91	5	4
AKT1/NOTCH1	128487	110	748	247	9	10
AKT1/NPM1	121378	108	742	37	5	5
AKT1/NRAS	130285	111	749	66	1	1
AKT1/PDGFRA	126044	110	747	161	10	9
AKT1/PIK3CA	130544	111	749	353	3	3
AKT1/PTEN	129585	110	748	208	2	2
AKT1/PTPN11	125046	109	747	92	5	5
AKT1/RB1	127329	110	748	191	7	4
AKT1/RET	128085	110	748	166	8	7
AKT1/SMAD4	128383	110	748	138	5	3
AKT1/SMARCB1	126939	110	748	75	7	5
AKT1/SMO	124951	110	748	124	7	7
AKT1/SRC	109185	109	745	63	5	3
AKT1/STK11	128383	110	748	135	4	6
AKT1/TP53	129585	110	748	786	7	3
AKT1/VHL	123119	108	743	41	4	5
AKT1/EZH2	118730	109	744	82	7	3
AKT1/IDH2	122867	110	745	64	6	4
AKT1/AKT2	111325	110	736	51	3	1
AKT1/AKT3	109003	109	734	51	3	2
AKT1/BRCA1	112026	111	738	154	4	8
AKT1/BRCA2	111067	110	737	245	8	13
AKT1/DDR2	111084	110	736	108	6	8
AKT1/ERBB3	113093	111	738	149	9	7
AKT1/FGFR4	110228	110	737	101	6	4
AKT1/MAP2K1	112265	110	736	64	4	4
AKT1/MTOR	110495	110	736	258	12	13
AKT1/NF1	112103	111	738	261	8	4
AKT1/NOTCH2	104425	107	725	164	7	5
AKT1/PIK3R1	112134	110	737	128	2	2
AKT1/ROS1	114388	111	742	191	6	10
AKT1/TSC1	108744	109	736	130	3	6
AKT1/TSC2	108744	109	736	165	5	6
AKT1/CBL	107465	105	733	96	5	5
AKT1/DNMT3A	106310	104	730	136	4	6
AKT1/ESR1	110586	107	734	140	3	5
AKT1/JAK1	99527	108	728	134	6	3
AKT1/KMT2A	106520	104	730	228	10	11
AKT1/MSH6	108285	105	732	177	8	9
AKT1/MYC	108992	107	733	53	3	2
AKT1/NF2	109850	106	732	67	5	1
AKT1/SF3B1	110890	106	733	140	3	3
AKT1/GATA1	77010	103	708	34	3	2
AKT1/RUNX1	107797	105	730	116	5	6
ALK/APC	127415	110	746	906	16	20
ALK/ATM	124504	109	747	707	19	24
ALK/BRAF	131042	111	749	523	12	12
ALK/CDH1	125685	109	745	334	15	12
ALK/CDKN2A	129140	110	748	374	13	6
ALK/CSF1R	106599	109	745	253	15	15
ALK/CTNNB1	128597	110	748	320	10	5
ALK/EGFR	131042	111	749	486	14	16
ALK/ERBB2	131042	111	749	404	13	16
ALK/ERBB4	128161	111	749	642	15	28
ALK/FBXW7	129140	110	748	481	14	19
ALK/FGFR1	127870	110	748	298	10	18
ALK/FGFR2	128217	110	747	364	14	13
ALK/FGFR3	127460	110	747	331	14	20
ALK/FLT3	126919	110	747	435	14	21
ALK/GNA11	125645	110	746	159	8	9
ALK/GNAQ	126402	110	746	140	9	10
ALK/GNAS	126783	109	747	185	9	9
ALK/HNF1A	122419	109	746	315	14	17
ALK/HRAS	129875	111	748	138	9	6
ALK/IDH1	127870	110	748	228	12	7
ALK/JAK2	124796	110	746	266	12	15
ALK/JAK3	125873	110	748	377	12	23
ALK/KDR	123747	109	747	534	16	19
ALK/KIT	128231	110	747	337	11	21
ALK/KRAS	131056	111	749	677	4	3
ALK/MET	127083	110	747	450	15	21
ALK/MLH1	125671	109	747	293	17	19
ALK/MPL	123270	108	744	241	12	21
ALK/NOTCH1	128999	110	748	659	16	27
ALK/NPM1	121378	108	742	87	8	11
ALK/NRAS	131042	111	749	213	4	1
ALK/PDGFRA	125785	110	747	448	12	23
ALK/PIK3CA	131056	111	749	795	11	13
ALK/PTEN	130083	110	748	560	6	9
ALK/PTPN11	125544	109	747	220	13	12
ALK/RB1	128100	110	748	481	10	17
ALK/RET	127826	110	748	441	15	26
ALK/SMAD4	129154	110	748	312	13	9
ALK/SMARCB1	126939	110	748	167	10	8
ALK/SMO	125449	110	748	306	11	17
ALK/SRC	108926	109	745	137	12	10
ALK/STK11	129140	110	748	339	9	9
ALK/TP53	130097	110	748	2032	9	16
ALK/VHL	122874	108	743	84	5	1
ALK/EZH2	118730	109	744	235	13	19
ALK/IDH2	122881	110	745	149	12	14
ALK/AKT2	111325	110	736	135	5	6
ALK/AKT3	109003	109	734	202	10	12
ALK/BRCA1	112538	111	738	410	14	22
ALK/BRCA2	111579	110	737	656	20	27
ALK/DDR2	111841	110	736	309	12	17
ALK/ERBB3	113850	111	738	368	10	9
ALK/FGFR4	110242	110	737	321	14	13
ALK/MAP2K1	112265	110	736	156	10	5
ALK/MTOR	110993	110	736	501	16	22
ALK/NF1	112874	111	738	814	14	23
ALK/NOTCH2	105196	107	725	471	16	25
ALK/PIK3R1	112134	110	737	343	11	8
ALK/ROS1	114388	111	742	655	16	28
ALK/TSC1	109515	109	736	350	13	16
ALK/TSC2	109515	109	736	425	15	14
ALK/CBL	108222	105	733	311	12	14
ALK/DNMT3A	107067	104	730	361	11	16
ALK/ESR1	111357	107	734	276	16	12
ALK/JAK1	100298	108	728	310	12	14
ALK/KMT2A	107032	104	730	661	16	24
ALK/MSH6	108285	105	732	435	13	25
ALK/MYC	108992	107	733	125	5	3
ALK/NF2	109850	106	732	205	9	12
ALK/SF3B1	110890	106	733	341	10	14
ALK/GATA1	77010	103	708	79	6	5
ALK/RUNX1	107797	105	730	225	10	6
APC/ATM	123119	108	744	1392	19	19
APC/BRAF	127761	110	746	1009	10	10
APC/CDH1	125685	109	745	480	11	11
APC/CDKN2A	126442	109	745	566	9	4
APC/CSF1R	104955	108	742	345	12	11
APC/CTNNB1	125360	109	745	573	4	9
APC/EGFR	127660	110	746	804	12	7
APC/ERBB2	127761	110	746	762	13	12
APC/ERBB4	125463	110	746	1059	19	22
APC/FBXW7	126802	109	745	1526	15	20
APC/FGFR1	124229	109	745	448	12	17
APC/FGFR2	124835	109	744	504	15	17
APC/FGFR3	123819	109	744	539	15	11
APC/FLT3	125635	109	744	593	18	23
APC/GNA11	122263	109	744	260	7	10
APC/GNAQ	122761	109	743	205	9	8
APC/GNAS	124041	108	744	383	10	10
APC/HNF1A	120775	108	742	443	12	13
APC/HRAS	126493	110	745	213	6	10
APC/IDH1	124330	109	745	340	9	7
APC/JAK2	123367	109	744	486	15	15
APC/JAK3	124229	109	745	548	13	16
APC/KDR	122463	108	744	899	18	19
APC/KIT	124849	109	744	517	10	15
APC/KRAS	127775	110	746	4670	12	11
APC/MET	123701	109	744	688	13	17
APC/MLH1	124027	108	744	452	11	13
APC/MPL	123270	108	744	327	10	11
APC/NOTCH1	126816	109	745	1060	22	23
APC/NPM1	121479	108	742	134	4	5
APC/NRAS	127502	110	746	620	5	4
APC/PDGFRA	123457	109	744	685	16	15
APC/PIK3CA	127775	110	746	2537	13	11
APC/PTEN	126701	109	745	1089	11	7
APC/PTPN11	123105	108	744	319	9	12
APC/RB1	126557	109	745	795	16	14
APC/RET	124589	109	745	714	16	20
APC/SMAD4	126456	109	745	1406	13	13
APC/SMARCB1	125295	109	745	289	8	10
APC/SMO	124165	109	745	512	10	13
APC/SRC	107541	108	742	224	11	11
APC/STK11	126442	109	745	506	10	8
APC/TP53	126816	109	745	8117	13	16
APC/VHL	123133	108	743	163	11	5
APC/EZH2	117086	108	741	351	13	12
APC/IDH2	119341	109	742	238	8	4
APC/AKT2	109738	109	733	210	5	4
APC/AKT3	107315	108	731	281	9	5
APC/BRCA1	111153	110	735	606	13	12
APC/BRCA2	110295	109	734	1098	16	22
APC/DDR2	108200	109	733	450	9	11
APC/ERBB3	112307	110	735	720	9	12
APC/FGFR4	108598	109	734	406	7	10
APC/MAP2K1	108624	109	733	262	8	6
APC/MTOR	108665	109	733	872	15	17
APC/NF1	111230	110	735	1201	16	22
APC/NOTCH2	103653	105	721	689	14	14
APC/PIK3R1	110490	109	734	681	9	7
APC/ROS1	111902	110	739	1017	18	27
APC/TSC1	107972	108	733	538	8	8
APC/TSC2	107871	108	733	728	15	12
APC/CBL	106679	104	730	411	10	13
APC/DNMT3A	107168	104	730	517	12	10
APC/ESR1	108814	106	731	471	6	7
APC/JAK1	98654	107	724	469	9	10
APC/KMT2A	107392	104	730	985	15	23
APC/MSH6	106641	104	729	723	18	19
APC/MYC	107348	106	730	188	5	3
APC/NF2	108206	105	729	302	8	6
APC/SF3B1	108192	105	730	534	8	11
APC/GATA1	77010	103	708	137	9	6
APC/RUNX1	107797	105	730	342	9	9
ATM/BRAF	124749	109	747	733	7	8
ATM/CDH1	122089	108	744	438	9	18
ATM/CDKN2A	124490	109	747	488	10	13
ATM/CSF1R	105418	109	745	296	11	16
ATM/CTNNB1	124763	109	747	461	3	6
ATM/EGFR	124749	109	747	723	18	14
ATM/ERBB2	124749	109	747	576	13	17
ATM/ERBB4	123733	109	747	812	15	26
ATM/FBXW7	124749	109	747	715	14	15
ATM/FGFR1	123733	109	747	361	11	18
ATM/FGFR2	124339	109	746	447	12	13
ATM/FGFR3	123323	109	746	518	15	15
ATM/FLT3	123582	109	746	538	13	22
ATM/GNA11	121767	109	746	244	11	13
ATM/GNAQ	122265	109	745	199	9	13
ATM/GNAS	124504	109	747	304	12	10
ATM/HNF1A	122419	109	746	383	16	21
ATM/HRAS	123582	109	746	190	8	7
ATM/IDH1	123733	109	747	330	8	6
ATM/JAK2	124052	109	746	435	12	22
ATM/JAK3	123733	109	747	502	14	23
ATM/KDR	124006	109	747	677	17	22
ATM/KIT	124353	109	746	481	14	20
ATM/KRAS	124763	109	747	1630	9	7
ATM/MET	123205	109	746	611	14	17
ATM/MLH1	124490	109	747	391	18	16
ATM/MPL	122089	108	744	290	14	12
ATM/NOTCH1	124763	109	747	941	18	24
ATM/NPM1	121378	108	742	114	6	6
ATM/NRAS	124490	109	747	314	7	2
ATM/PDGFRA	122961	109	746	576	14	20
ATM/PIK3CA	124763	109	747	1347	14	12
ATM/PTEN	124749	109	747	959	13	14
ATM/PTPN11	124749	109	747	293	13	11
ATM/RB1	124504	109	747	704	13	10
ATM/RET	123992	109	747	537	13	17
ATM/SMAD4	124504	109	747	521	13	11
ATM/SMARCB1	123343	109	747	238	8	10
ATM/SMO	124749	109	747	417	13	13
ATM/SRC	108004	109	745	183	12	13
ATM/STK11	124490	109	747	550	10	12
ATM/TP53	124763	109	747	2663	4	6
ATM/VHL	121952	108	743	160	8	7
ATM/EZH2	118730	109	744	304	13	13
ATM/IDH2	118744	109	744	220	12	8
ATM/AKT2	107685	109	735	189	7	7
ATM/AKT3	107778	109	734	246	9	9
ATM/BRCA1	109062	109	736	554	15	14
ATM/BRCA2	109062	109	736	904	14	24
ATM/DDR2	108885	109	735	398	11	13
ATM/ERBB3	109295	109	736	526	8	9
ATM/FGFR4	108943	109	736	383	13	10
ATM/MAP2K1	108128	109	735	180	3	5
ATM/MTOR	109144	109	735	669	14	20
ATM/NF1	109309	109	736	1068	12	25
ATM/NOTCH2	104570	107	725	580	16	14
ATM/PIK3R1	108538	109	736	541	11	9
ATM/ROS1	110071	109	740	801	12	22
ATM/TSC1	109309	109	736	447	10	10
ATM/TSC2	109309	109	736	601	13	17
ATM/CBL	108222	105	733	355	11	16
ATM/DNMT3A	107067	104	730	508	10	17
ATM/ESR1	108318	105	732	338	8	11
ATM/JAK1	95743	105	725	434	15	18
ATM/KMT2A	107291	104	730	851	14	29
ATM/MSH6	107104	105	732	607	14	18
ATM/MYC	106852	105	731	176	6	6
ATM/NF2	106254	105	731	296	15	7
ATM/SF3B1	107421	105	732	483	8	15
ATM/GATA1	75829	103	708	112	7	4
ATM/RUNX1	104201	104	729	303	8	12
BRAF/CDH1	125685	109	745	262	4	7
BRAF/CDKN2A	132343	110	759	510	5	2
BRAF/CSF1R	106732	109	747	192	5	3
BRAF/CTNNB1	128943	110	748	375	5	1
BRAF/EGFR	131301	111	749	448	4	4
BRAF/ERBB2	131402	111	749	367	6	5
BRAF/ERBB4	128161	111	749	636	10	6
BRAF/FBXW7	132703	110	759	531	12	5
BRAF/FGFR1	127870	110	748	248	6	5
BRAF/FGFR2	128476	110	747	330	5	2
BRAF/FGFR3	127460	110	747	313	5	7
BRAF/FLT3	130482	110	758	446	11	12
BRAF/GNA11	125904	110	747	119	2	2
BRAF/GNAQ	126402	110	746	120	5	5
BRAF/GNAS	128203	109	755	250	9	7
BRAF/HNF1A	122419	109	746	309	8	11
BRAF/HRAS	133337	111	759	153	6	4
BRAF/IDH1	131174	110	759	299	10	6
BRAF/JAK2	128244	110	758	289	7	7
BRAF/JAK3	127454	110	758	396	12	11
BRAF/KDR	124093	109	747	533	8	8
BRAF/KIT	131679	110	758	359	12	12
BRAF/KRAS	134605	111	760	613	6	5
BRAF/MET	127328	110	747	464	8	8
BRAF/MLH1	125671	109	747	225	5	6
BRAF/MPL	126473	108	755	196	3	7
BRAF/NOTCH1	130926	110	758	680	15	15
BRAF/NPM1	124682	108	753	128	7	4
BRAF/NRAS	134346	111	760	345	14	8
BRAF/PDGFRA	127625	110	757	456	14	7
BRAF/PIK3CA	131402	111	749	950	8	7
BRAF/PTEN	133545	110	759	833	4	5
BRAF/PTPN11	129006	109	758	199	7	7
BRAF/RB1	128334	110	750	378	3	6
BRAF/RET	128186	110	748	423	9	8
BRAF/SMAD4	129140	110	748	489	7	9
BRAF/SMARCB1	126939	110	748	144	4	3
BRAF/SMO	125809	110	748	293	6	4
BRAF/SRC	109185	109	745	116	5	4
BRAF/STK11	129140	110	748	410	5	4
BRAF/TP53	133646	110	759	2505	4	6
BRAF/VHL	123119	108	743	75	2	1
BRAF/EZH2	121933	109	755	251	11	11
BRAF/IDH2	126171	110	756	186	8	5
BRAF/AKT2	111426	110	736	129	5	4
BRAF/AKT3	109003	109	734	131	5	3
BRAF/BRCA1	112783	111	738	362	9	8
BRAF/BRCA2	111925	110	737	617	11	15
BRAF/DDR2	111841	110	736	254	10	10
BRAF/ERBB3	113951	111	738	335	7	3
BRAF/FGFR4	110228	110	737	253	3	4
BRAF/MAP2K1	112412	110	739	202	5	5
BRAF/MTOR	111252	110	736	492	9	11
BRAF/NF1	113007	111	741	700	7	7
BRAF/NOTCH2	105283	107	725	389	6	6
BRAF/PIK3R1	112281	110	740	293	3	2
BRAF/ROS1	114489	111	742	648	8	7
BRAF/TSC1	109602	109	736	300	3	8
BRAF/TSC2	109501	109	736	451	9	7
BRAF/CBL	111526	105	746	266	8	9
BRAF/DNMT3A	110371	104	743	369	7	5
BRAF/ESR1	111490	107	737	222	5	6
BRAF/JAK1	100431	108	731	297	8	13
BRAF/KMT2A	108959	104	742	645	13	13
BRAF/MSH6	108432	105	735	383	8	13
BRAF/MYC	108992	107	733	117	3	1
BRAF/NF2	109850	106	732	212	6	5
BRAF/SF3B1	114093	106	746	356	9	8
BRAF/GATA1	78591	103	720	69	3	2
BRAF/RUNX1	111000	105	743	266	9	7
CDH1/CDKN2A	125685	109	745	183	4	1
CDH1/CSF1R	104184	108	742	131	8	7
CDH1/CTNNB1	123270	108	744	211	3	4
CDH1/EGFR	125685	109	745	319	8	13
CDH1/ERBB2	125685	109	745	395	9	14
CDH1/ERBB4	124504	109	745	335	11	15
CDH1/FBXW7	125685	109	745	259	6	9
CDH1/FGFR1	123270	108	744	178	8	11
CDH1/FGFR2	122860	108	743	199	8	11
CDH1/FGFR3	122860	108	743	217	8	9
CDH1/FLT3	125275	109	744	228	9	12
CDH1/GNA11	121045	108	742	96	5	5
CDH1/GNAQ	121045	108	742	94	7	8
CDH1/GNAS	123270	108	744	123	6	8
CDH1/HNF1A	120775	108	742	184	9	5
CDH1/HRAS	125275	109	744	78	4	5
CDH1/IDH1	123270	108	744	148	5	5
CDH1/JAK2	121378	108	742	193	10	8
CDH1/JAK3	123270	108	744	217	7	13
CDH1/KDR	122089	108	744	304	12	11
CDH1/KIT	122860	108	743	216	10	13
CDH1/KRAS	125685	109	745	330	2	1
CDH1/MET	122469	108	743	249	8	11
CDH1/MLH1	123270	108	744	193	12	11
CDH1/MPL	123270	108	744	147	6	8
CDH1/NOTCH1	125685	109	745	382	9	12
CDH1/NPM1	121378	108	742	51	4	2
CDH1/NRAS	125685	109	745	103	3	3
CDH1/PDGFRA	122239	108	743	242	8	12
CDH1/PIK3CA	125685	109	745	1216	11	10
CDH1/PTEN	125685	109	745	427	10	5
CDH1/PTPN11	122089	108	744	117	5	4
CDH1/RB1	125685	109	745	344	10	12
CDH1/RET	123270	108	744	235	9	9
CDH1/SMAD4	125685	109	745	210	7	5
CDH1/SMARCB1	125295	109	745	112	6	5
CDH1/SMO	122089	108	744	187	11	10
CDH1/SRC	107282	108	742	89	7	9
CDH1/STK11	125685	109	745	149	5	6
CDH1/TP53	125685	109	745	1267	12	4
CDH1/VHL	122860	108	743	59	5	2
CDH1/EZH2	117086	108	741	155	10	7
CDH1/IDH2	118267	108	741	93	4	5
CDH1/AKT2	109637	109	733	88	4	6
CDH1/AKT3	107315	108	731	115	5	7
CDH1/BRCA1	109164	109	734	239	6	8
CDH1/BRCA2	109164	109	734	424	12	14
CDH1/DDR2	106484	108	732	177	7	7
CDH1/ERBB3	110490	109	734	313	6	9
CDH1/FGFR4	107625	108	733	190	6	6
CDH1/MAP2K1	107665	108	732	89	5	4
CDH1/MTOR	106690	108	732	334	16	17
CDH1/NF1	109500	109	734	482	14	14
CDH1/NOTCH2	102781	105	721	274	7	6
CDH1/PIK3R1	110490	109	734	240	6	6
CDH1/ROS1	110842	109	738	342	12	10
CDH1/TSC1	107100	108	733	225	8	10
CDH1/TSC2	107100	108	733	281	6	14
CDH1/CBL	105821	104	730	161	8	9
CDH1/DNMT3A	106310	104	730	240	12	13
CDH1/ESR1	107084	104	729	236	4	7
CDH1/JAK1	96924	105	722	229	11	12
CDH1/KMT2A	106261	104	730	428	14	19
CDH1/MSH6	106641	104	729	291	10	16
CDH1/MYC	106389	104	728	94	4	4
CDH1/NF2	108206	105	729	133	8	4
CDH1/SF3B1	108192	105	730	244	8	6
CDH1/GATA1	77010	103	708	53	3	3
CDH1/RUNX1	107797	105	730	244	7	9
CDKN2A/CSF1R	106732	109	747	153	8	5
CDKN2A/CTNNB1	126725	109	747	238	4	5
CDKN2A/EGFR	129140	110	748	395	9	5
CDKN2A/ERBB2	129140	110	748	282	9	3
CDKN2A/ERBB4	127202	110	748	528	14	14
CDKN2A/FBXW7	132343	110	759	318	10	9
CDKN2A/FGFR1	125968	109	747	190	7	3
CDKN2A/FGFR2	126315	109	746	241	8	8
CDKN2A/FGFR3	125558	109	746	267	10	9
CDKN2A/FLT3	130122	110	758	304	8	8
CDKN2A/GNA11	123743	109	745	100	4	2
CDKN2A/GNAQ	124500	109	745	89	4	1
CDKN2A/GNAS	128159	109	755	159	4	4
CDKN2A/HNF1A	122419	109	746	198	9	4
CDKN2A/HRAS	131176	110	758	120	4	2
CDKN2A/IDH1	129171	109	758	162	3	0
CDKN2A/JAK2	126982	109	756	177	5	3
CDKN2A/JAK3	126495	109	757	244	10	4
CDKN2A/KDR	123733	109	747	392	11	8
CDKN2A/KIT	129518	109	757	235	6	4
CDKN2A/KRAS	132343	110	759	1365	5	4
CDKN2A/MET	125167	109	746	321	6	8
CDKN2A/MLH1	125671	109	747	182	8	7
CDKN2A/MPL	126473	108	755	146	7	4
CDKN2A/NOTCH1	129667	110	758	639	15	24
CDKN2A/NPM1	124581	108	753	67	3	2
CDKN2A/NRAS	132343	110	759	324	2	1
CDKN2A/PDGFRA	125464	109	756	296	11	7
CDKN2A/PIK3CA	129140	110	748	597	7	2
CDKN2A/PTEN	132343	110	759	490	8	4
CDKN2A/PTPN11	128747	109	758	142	6	2
CDKN2A/RB1	128233	110	750	209	3	1
CDKN2A/RET	125968	109	747	323	11	10
CDKN2A/SMAD4	129140	110	748	422	6	2
CDKN2A/SMARCB1	126939	110	748	87	3	0
CDKN2A/SMO	124490	109	747	191	8	4
CDKN2A/SRC	108926	109	745	87	7	3
CDKN2A/STK11	129140	110	748	338	12	4
CDKN2A/TP53	132343	110	759	3315	21	30
CDKN2A/VHL	122860	108	743	59	1	1
CDKN2A/EZH2	121933	109	755	136	4	2
CDKN2A/IDH2	124168	109	755	93	5	2
CDKN2A/AKT2	111281	110	736	86	4	0
CDKN2A/AKT3	108959	109	734	111	6	6
CDKN2A/BRCA1	111565	110	737	266	9	7
CDKN2A/BRCA2	111565	110	737	437	11	7
CDKN2A/DDR2	109939	109	735	212	9	6
CDKN2A/ERBB3	112891	110	737	225	6	8
CDKN2A/FGFR4	109269	109	736	189	6	5
CDKN2A/MAP2K1	110510	109	738	120	4	1
CDKN2A/MTOR	109091	109	735	310	8	6
CDKN2A/NF1	112048	110	740	571	16	12
CDKN2A/NOTCH2	105182	107	725	353	14	7
CDKN2A/PIK3R1	112281	110	740	208	8	4
CDKN2A/ROS1	112486	110	741	519	12	12
CDKN2A/TSC1	109501	109	736	216	7	4
CDKN2A/TSC2	109501	109	736	276	7	2
CDKN2A/CBL	111425	105	746	199	8	3
CDKN2A/DNMT3A	110270	104	743	236	8	7
CDKN2A/ESR1	109632	105	735	154	6	1
CDKN2A/JAK1	99472	106	729	161	8	6
CDKN2A/KMT2A	108599	104	742	417	13	8
CDKN2A/MSH6	108432	105	735	219	9	6
CDKN2A/MYC	108033	105	731	100	6	2
CDKN2A/NF2	109850	106	732	155	8	2
CDKN2A/SF3B1	114093	106	746	247	6	1
CDKN2A/GATA1	78591	103	720	58	7	3
CDKN2A/RUNX1	111000	105	743	135	4	3
CSF1R/CTNNB1	106599	109	745	118	7	2
CSF1R/EGFR	106585	109	745	236	14	18
CSF1R/ERBB2	106585	109	745	171	9	13
CSF1R/ERBB4	104647	109	745	280	14	16
CSF1R/FBXW7	106732	109	747	200	13	14
CSF1R/FGFR1	105828	109	745	106	9	8
CSF1R/FGFR2	106175	109	744	166	12	11
CSF1R/FGFR3	105418	109	744	164	13	18
CSF1R/FLT3	105565	109	746	202	14	16
CSF1R/GNA11	103603	109	743	102	11	8
CSF1R/GNAQ	104360	109	743	69	7	7
CSF1R/GNAS	106599	109	745	95	9	10
CSF1R/HNF1A	103361	109	744	137	14	17
CSF1R/HRAS	105565	109	746	70	7	9
CSF1R/IDH1	105975	109	747	93	4	3
CSF1R/JAK2	104854	109	745	126	8	9
CSF1R/JAK3	105975	109	747	161	12	14
CSF1R/KDR	104661	109	745	243	14	15
CSF1R/KIT	106336	109	746	153	12	11
CSF1R/KRAS	106746	109	747	277	4	2
CSF1R/MET	105041	109	744	184	11	13
CSF1R/MLH1	106585	109	745	119	8	13
CSF1R/MPL	104331	108	744	104	9	10
CSF1R/NOTCH1	106746	109	747	307	17	21
CSF1R/NPM1	102439	108	742	40	5	5
CSF1R/NRAS	106732	109	747	89	3	2
CSF1R/PDGFRA	104944	109	746	188	9	12
CSF1R/PIK3CA	106599	109	745	318	7	5
CSF1R/PTEN	106732	109	747	225	10	5
CSF1R/PTPN11	105551	109	747	105	10	7
CSF1R/RB1	106746	109	747	216	12	16
CSF1R/RET	105828	109	745	202	13	17
CSF1R/SMAD4	106599	109	745	135	8	8
CSF1R/SMARCB1	105438	109	745	82	8	7
CSF1R/SMO	105404	109	745	161	13	15
CSF1R/SRC	105828	109	745	94	14	10
CSF1R/STK11	106585	109	745	135	7	7
CSF1R/TP53	106746	109	747	746	8	6
CSF1R/VHL	103788	108	741	51	6	6
CSF1R/EZH2	99791	109	743	97	5	7
CSF1R/IDH2	100986	109	743	65	6	6
CSF1R/AKT2	89780	109	731	68	5	5
CSF1R/AKT3	89873	109	730	86	7	9
CSF1R/BRCA1	90078	109	732	175	8	10
CSF1R/BRCA2	90078	109	732	270	12	15
CSF1R/DDR2	89799	109	731	136	11	12
CSF1R/ERBB3	91390	109	732	157	9	8
CSF1R/FGFR4	90197	109	732	132	7	11
CSF1R/MAP2K1	90370	109	734	65	6	2
CSF1R/MTOR	90005	109	731	228	14	13
CSF1R/NF1	90561	109	735	348	12	16
CSF1R/NOTCH2	86138	107	719	179	7	13
CSF1R/PIK3R1	90780	109	735	144	7	4
CSF1R/ROS1	91013	109	737	267	9	11
CSF1R/TSC1	90429	109	732	143	6	8
CSF1R/TSC2	90429	109	732	188	10	10
CSF1R/CBL	89283	105	731	143	9	11
CSF1R/DNMT3A	88128	104	727	149	9	7
CSF1R/ESR1	90560	105	730	122	6	9
CSF1R/JAK1	81055	105	719	131	9	9
CSF1R/KMT2A	88093	104	727	279	14	17
CSF1R/MSH6	89346	105	730	177	8	13
CSF1R/MYC	88947	105	726	54	4	4
CSF1R/NF2	88349	105	726	92	5	6
CSF1R/SF3B1	88510	105	730	130	6	7
CSF1R/GATA1	77129	103	711	52	3	4
CSF1R/RUNX1	86443	104	726	116	10	12
CTNNB1/EGFR	128842	110	748	523	10	7
CTNNB1/ERBB2	128943	110	748	271	6	9
CTNNB1/ERBB4	125746	110	748	381	7	9
CTNNB1/FBXW7	127085	109	747	385	10	8
CTNNB1/FGFR1	127826	110	748	176	10	3
CTNNB1/FGFR2	128432	110	747	267	8	7
CTNNB1/FGFR3	127416	110	747	220	7	2
CTNNB1/FLT3	124864	109	746	238	7	6
CTNNB1/GNA11	125860	110	747	98	5	1
CTNNB1/GNAQ	126358	110	746	96	4	3
CTNNB1/GNAS	126739	109	747	155	4	5
CTNNB1/HNF1A	122419	109	746	184	5	4
CTNNB1/HRAS	127675	110	747	84	4	2
CTNNB1/IDH1	127927	110	748	152	6	3
CTNNB1/JAK2	125011	110	747	168	4	2
CTNNB1/JAK3	125873	110	748	216	11	6
CTNNB1/KDR	124107	109	747	284	5	2
CTNNB1/KIT	128446	110	747	249	8	7
CTNNB1/KRAS	128957	110	748	689	3	4
CTNNB1/MET	127298	110	747	270	7	8
CTNNB1/MLH1	125671	109	747	201	6	5
CTNNB1/MPL	123270	108	744	134	10	4
CTNNB1/NOTCH1	126944	109	747	390	9	9
CTNNB1/NPM1	121479	108	742	54	1	1
CTNNB1/NRAS	128684	110	748	207	5	1
CTNNB1/PDGFRA	126000	110	747	255	14	9
CTNNB1/PIK3CA	128957	110	748	972	12	11
CTNNB1/PTEN	127883	109	747	899	10	8
CTNNB1/PTPN11	125803	109	747	137	6	4
CTNNB1/RB1	125786	109	747	298	4	3
CTNNB1/RET	128186	110	748	246	7	4
CTNNB1/SMAD4	126739	109	747	309	9	5
CTNNB1/SMARCB1	124524	109	747	104	4	3
CTNNB1/SMO	125809	110	748	193	5	6
CTNNB1/SRC	109185	109	745	84	6	4
CTNNB1/STK11	126725	109	747	246	2	2
CTNNB1/TP53	127998	109	747	1295	1	1
CTNNB1/VHL	123133	108	743	39	0	0
CTNNB1/EZH2	118730	109	744	151	5	2
CTNNB1/IDH2	122938	110	745	91	4	4
CTNNB1/AKT2	108967	109	735	86	4	4
CTNNB1/AKT3	108959	109	734	126	8	4
CTNNB1/BRCA1	110382	110	737	244	5	4
CTNNB1/BRCA2	109524	109	736	430	8	8
CTNNB1/DDR2	111797	110	736	169	5	7
CTNNB1/ERBB3	111536	110	737	297	11	9
CTNNB1/FGFR4	110242	110	737	177	6	3
CTNNB1/MAP2K1	112221	110	736	99	4	1
CTNNB1/MTOR	111208	110	736	368	11	6
CTNNB1/NF1	110459	110	737	412	5	6
CTNNB1/NOTCH2	105297	107	725	279	8	6
CTNNB1/PIK3R1	109719	109	736	450	6	5
CTNNB1/ROS1	112030	110	741	369	6	6
CTNNB1/TSC1	109616	109	736	204	4	3
CTNNB1/TSC2	109515	109	736	283	3	4
CTNNB1/CBL	108323	105	733	172	7	5
CTNNB1/DNMT3A	107168	104	730	220	9	5
CTNNB1/ESR1	111357	107	734	205	6	5
CTNNB1/JAK1	97883	107	727	246	6	5
CTNNB1/KMT2A	107392	104	730	412	10	14
CTNNB1/MSH6	108285	105	732	302	9	8
CTNNB1/MYC	108992	107	733	90	2	2
CTNNB1/NF2	107435	105	731	128	5	4
CTNNB1/SF3B1	108475	105	732	224	5	6
CTNNB1/GATA1	77010	103	708	52	3	2
CTNNB1/RUNX1	105382	104	729	131	4	2
EGFR/ERBB2	131301	111	749	388	6	11
EGFR/ERBB4	128161	111	749	570	12	15
EGFR/FBXW7	129399	110	748	416	13	16
EGFR/FGFR1	127870	110	748	270	12	9
EGFR/FGFR2	128476	110	747	326	19	11
EGFR/FGFR3	127460	110	747	322	9	13
EGFR/FLT3	127178	110	747	387	10	17
EGFR/GNA11	125904	110	747	174	8	10
EGFR/GNAQ	126402	110	746	145	9	12
EGFR/GNAS	126769	109	747	172	8	9
EGFR/HNF1A	122419	109	746	266	12	17
EGFR/HRAS	130134	111	748	140	7	6
EGFR/IDH1	127870	110	748	224	5	5
EGFR/JAK2	125041	110	747	281	7	7
EGFR/JAK3	125873	110	748	354	11	17
EGFR/KDR	123992	109	747	511	12	21
EGFR/KIT	128476	110	747	351	15	16
EGFR/KRAS	131301	111	749	478	1	2
EGFR/MET	127328	110	747	466	10	18
EGFR/MLH1	125671	109	747	246	10	13
EGFR/MPL	123270	108	744	233	11	10
EGFR/NOTCH1	129244	110	748	600	14	15
EGFR/NPM1	121378	108	742	92	6	6
EGFR/NRAS	131042	111	749	230	5	2
EGFR/PDGFRA	126044	110	747	395	8	13
EGFR/PIK3CA	131301	111	749	942	9	13
EGFR/PTEN	130342	110	748	992	9	14
EGFR/PTPN11	125803	109	747	240	12	10
EGFR/RB1	128086	110	748	628	8	14
EGFR/RET	128085	110	748	400	14	16
EGFR/SMAD4	129140	110	748	438	10	10
EGFR/SMARCB1	126939	110	748	177	9	7
EGFR/SMO	125708	110	748	297	12	7
EGFR/SRC	109185	109	745	128	11	8
EGFR/STK11	129140	110	748	381	9	9
EGFR/TP53	130342	110	748	3648	5	4
EGFR/VHL	123119	108	743	97	6	4
EGFR/EZH2	118730	109	744	199	6	7
EGFR/IDH2	122867	110	745	137	8	8
EGFR/AKT2	111325	110	736	124	4	4
EGFR/AKT3	109003	109	734	166	7	8
EGFR/BRCA1	112783	111	738	366	10	11
EGFR/BRCA2	111824	110	737	592	12	18
EGFR/DDR2	111841	110	736	260	14	7
EGFR/ERBB3	113850	111	738	316	8	8
EGFR/FGFR4	110228	110	737	265	11	7
EGFR/MAP2K1	112265	110	736	108	5	2
EGFR/MTOR	111252	110	736	461	15	16
EGFR/NF1	112860	111	738	695	12	15
EGFR/NOTCH2	105182	107	725	425	11	12
EGFR/PIK3R1	112134	110	737	346	6	4
EGFR/ROS1	114388	111	742	596	17	17
EGFR/TSC1	109501	109	736	320	12	11
EGFR/TSC2	109501	109	736	414	9	10
EGFR/CBL	108222	105	733	268	12	11
EGFR/DNMT3A	107067	104	730	345	9	11
EGFR/ESR1	111343	107	734	221	6	6
EGFR/JAK1	100284	108	728	278	10	12
EGFR/KMT2A	107277	104	730	568	15	13
EGFR/MSH6	108285	105	732	384	14	17
EGFR/MYC	108992	107	733	103	3	3
EGFR/NF2	109850	106	732	191	8	7
EGFR/SF3B1	110890	106	733	303	6	5
EGFR/GATA1	77010	103	708	82	6	4
EGFR/RUNX1	107797	105	730	221	8	8
ERBB2/ERBB4	128161	111	749	417	14	15
ERBB2/FBXW7	129500	110	748	439	14	16
ERBB2/FGFR1	127870	110	748	220	10	7
ERBB2/FGFR2	128476	110	747	250	6	8
ERBB2/FGFR3	127460	110	747	307	11	14
ERBB2/FLT3	127279	110	747	281	16	14
ERBB2/GNA11	125904	110	747	144	8	10
ERBB2/GNAQ	126402	110	746	104	4	7
ERBB2/GNAS	126769	109	747	159	6	7
ERBB2/HNF1A	122419	109	746	228	12	12
ERBB2/HRAS	130134	111	748	120	8	11
ERBB2/IDH1	127971	110	748	168	3	4
ERBB2/JAK2	125041	110	747	227	8	13
ERBB2/JAK3	125873	110	748	260	12	10
ERBB2/KDR	124093	109	747	332	7	11
ERBB2/KIT	128476	110	747	242	7	12
ERBB2/KRAS	131402	111	749	541	4	2
ERBB2/MET	127328	110	747	333	12	11
ERBB2/MLH1	125671	109	747	237	13	12
ERBB2/MPL	123270	108	744	163	7	11
ERBB2/NOTCH1	129345	110	748	521	14	14
ERBB2/NPM1	121479	108	742	63	4	5
ERBB2/NRAS	131143	111	749	157	3	4
ERBB2/PDGFRA	126044	110	747	286	8	12
ERBB2/PIK3CA	131402	111	749	844	7	6
ERBB2/PTEN	130342	110	748	496	4	6
ERBB2/PTPN11	125803	109	747	161	8	8
ERBB2/RB1	128187	110	748	443	9	11
ERBB2/RET	128186	110	748	316	11	14
ERBB2/SMAD4	129140	110	748	282	6	5
ERBB2/SMARCB1	126939	110	748	148	8	7
ERBB2/SMO	125809	110	748	253	11	13
ERBB2/SRC	109185	109	745	120	9	8
ERBB2/STK11	129140	110	748	260	6	4
ERBB2/TP53	130443	110	748	1832	9	4
ERBB2/VHL	123119	108	743	78	5	5
ERBB2/EZH2	118730	109	744	165	6	10
ERBB2/IDH2	122968	110	745	133	9	11
ERBB2/AKT2	111426	110	736	122	5	5
ERBB2/AKT3	109003	109	734	122	5	5
ERBB2/BRCA1	112783	111	738	311	8	12
ERBB2/BRCA2	111925	110	737	475	10	13
ERBB2/DDR2	111841	110	736	221	9	9
ERBB2/ERBB3	113951	111	738	392	13	13
ERBB2/FGFR4	110228	110	737	220	9	9
ERBB2/MAP2K1	112265	110	736	101	3	3
ERBB2/MTOR	111252	110	736	397	11	12
ERBB2/NF1	112860	111	738	583	10	17
ERBB2/NOTCH2	105283	107	725	316	10	13
ERBB2/PIK3R1	112134	110	737	287	7	4
ERBB2/ROS1	114489	111	742	440	10	14
ERBB2/TSC1	109602	109	736	273	6	8
ERBB2/TSC2	109501	109	736	334	9	12
ERBB2/CBL	108323	105	733	197	7	9
ERBB2/DNMT3A	107168	104	730	255	6	8
ERBB2/ESR1	111343	107	734	205	9	7
ERBB2/JAK1	100284	108	728	248	7	9
ERBB2/KMT2A	107378	104	730	501	14	19
ERBB2/MSH6	108285	105	732	365	14	17
ERBB2/MYC	108992	107	733	99	4	3
ERBB2/NF2	109850	106	732	149	7	6
ERBB2/SF3B1	110890	106	733	248	6	7
ERBB2/GATA1	77010	103	708	68	5	7
ERBB2/RUNX1	107797	105	730	197	11	11
ERBB4/FBXW7	127202	110	748	574	13	18
ERBB4/FGFR1	125746	110	748	335	12	21
ERBB4/FGFR2	125336	110	747	443	12	14
ERBB4/FGFR3	125336	110	747	383	10	14
ERBB4/FLT3	125738	110	747	521	15	26
ERBB4/GNA11	123521	110	746	194	9	11
ERBB4/GNAQ	123521	110	746	169	9	14
ERBB4/GNAS	124787	109	747	195	7	10
ERBB4/HNF1A	122419	109	746	343	11	14
ERBB4/HRAS	127751	111	748	161	7	5
ERBB4/IDH1	125746	110	748	264	12	13
ERBB4/JAK2	123981	110	746	332	10	15
ERBB4/JAK3	124692	110	748	434	14	29
ERBB4/KDR	123733	109	747	720	21	26
ERBB4/KIT	125336	110	747	417	11	19
ERBB4/KRAS	128161	111	749	873	2	2
ERBB4/MET	124945	110	747	566	16	21
ERBB4/MLH1	123733	109	747	291	11	15
ERBB4/MPL	122089	108	744	277	10	11
ERBB4/NOTCH1	126148	110	748	742	13	26
ERBB4/NPM1	121378	108	742	104	5	7
ERBB4/NRAS	128161	111	749	349	7	1
ERBB4/PDGFRA	123661	110	747	517	12	23
ERBB4/PIK3CA	128161	111	749	912	13	14
ERBB4/PTEN	127202	110	748	632	7	9
ERBB4/PTPN11	124787	109	747	241	9	11
ERBB4/RB1	126148	110	748	518	11	11
ERBB4/RET	125746	110	748	511	14	21
ERBB4/SMAD4	127202	110	748	410	17	13
ERBB4/SMARCB1	125758	110	748	193	10	13
ERBB4/SMO	124692	110	748	352	9	15
ERBB4/SRC	107745	109	745	148	8	12
ERBB4/STK11	127202	110	748	443	11	12
ERBB4/TP53	127202	110	748	2480	12	14
ERBB4/VHL	121679	108	743	112	8	3
ERBB4/EZH2	118730	109	744	248	11	6
ERBB4/IDH2	120743	110	745	153	8	7
ERBB4/AKT2	110100	110	736	144	10	4
ERBB4/AKT3	107778	109	734	221	12	16
ERBB4/BRCA1	111406	111	738	422	15	21
ERBB4/BRCA2	110447	110	737	678	18	24
ERBB4/DDR2	110141	110	736	353	10	18
ERBB4/ERBB3	111912	111	738	401	13	18
ERBB4/FGFR4	109888	110	737	330	13	13
ERBB4/MAP2K1	110141	110	736	173	6	4
ERBB4/MTOR	109087	110	736	556	15	28
ERBB4/NF1	111912	111	738	913	17	25
ERBB4/NOTCH2	103799	107	725	521	12	17
ERBB4/PIK3R1	110953	110	737	361	12	8
ERBB4/ROS1	113445	111	742	829	18	33
ERBB4/TSC1	108538	109	736	337	9	10
ERBB4/TSC2	108538	109	736	483	15	18
ERBB4/CBL	107465	105	733	340	12	19
ERBB4/DNMT3A	106310	104	730	393	13	18
ERBB4/ESR1	108506	107	734	318	11	16
ERBB4/JAK1	98346	108	728	341	13	16
ERBB4/KMT2A	106261	104	730	707	15	30
ERBB4/MSH6	107104	105	732	421	14	19
ERBB4/MYC	107811	107	733	145	7	6
ERBB4/NF2	108669	106	732	240	9	11
ERBB4/SF3B1	110890	106	733	332	9	13
ERBB4/GATA1	75829	103	708	103	6	4
ERBB4/RUNX1	106616	105	730	238	9	10
FBXW7/FGFR1	125968	109	747	235	11	13
FBXW7/FGFR2	126574	109	746	346	16	13
FBXW7/FGFR3	125558	109	746	376	15	13
FBXW7/FLT3	130482	110	758	353	18	19
FBXW7/GNA11	124002	109	746	169	9	11
FBXW7/GNAQ	124500	109	745	153	10	10
FBXW7/GNAS	128159	109	755	277	14	20
FBXW7/HNF1A	122419	109	746	267	13	11
FBXW7/HRAS	131435	110	758	143	8	9
FBXW7/IDH1	129272	109	758	246	16	11
FBXW7/JAK2	127241	109	757	279	11	9
FBXW7/JAK3	126495	109	757	353	14	16
FBXW7/KDR	124093	109	747	446	17	18
FBXW7/KIT	129777	109	757	364	13	13
FBXW7/KRAS	132703	110	759	1280	12	9
FBXW7/MET	125426	109	746	390	11	14
FBXW7/MLH1	125671	109	747	270	10	16
FBXW7/MPL	126473	108	755	191	9	17
FBXW7/NOTCH1	130027	110	758	631	21	26
FBXW7/NPM1	124682	108	753	126	12	12
FBXW7/NRAS	132444	110	759	330	15	6
FBXW7/PDGFRA	125723	109	756	391	19	22
FBXW7/PIK3CA	129500	110	748	1319	15	17
FBXW7/PTEN	132602	110	759	768	12	8
FBXW7/PTPN11	129006	109	758	216	11	12
FBXW7/RB1	128334	110	750	464	13	12
FBXW7/RET	126328	109	747	370	14	16
FBXW7/SMAD4	129140	110	748	429	11	15
FBXW7/SMARCB1	126939	110	748	172	12	9
FBXW7/SMO	124850	109	747	285	13	10
FBXW7/SRC	109185	109	745	136	13	6
FBXW7/STK11	129140	110	748	306	8	7
FBXW7/TP53	132703	110	759	2493	15	9
FBXW7/VHL	123119	108	743	93	7	3
FBXW7/EZH2	121933	109	755	240	12	11
FBXW7/IDH2	124269	109	755	168	13	9
FBXW7/AKT2	111382	110	736	120	4	6
FBXW7/AKT3	108959	109	734	169	6	5
FBXW7/BRCA1	111824	110	737	331	12	11
FBXW7/BRCA2	111925	110	737	563	10	13
FBXW7/DDR2	109939	109	735	245	10	13
FBXW7/ERBB3	112992	110	737	441	10	14
FBXW7/FGFR4	109269	109	736	229	7	7
FBXW7/MAP2K1	110510	109	738	146	5	5
FBXW7/MTOR	109350	109	735	455	12	14
FBXW7/NF1	112048	110	740	602	13	18
FBXW7/NOTCH2	105283	107	725	368	9	12
FBXW7/PIK3R1	112281	110	740	404	9	6
FBXW7/ROS1	112587	110	741	483	15	12
FBXW7/TSC1	109602	109	736	292	6	6
FBXW7/TSC2	109501	109	736	394	12	12
FBXW7/CBL	111526	105	746	230	9	15
FBXW7/DNMT3A	110371	104	743	320	11	13
FBXW7/ESR1	109632	105	735	221	8	9
FBXW7/JAK1	99472	106	729	302	13	13
FBXW7/KMT2A	108959	104	742	523	15	15
FBXW7/MSH6	108432	105	735	429	10	20
FBXW7/MYC	108033	105	731	124	3	4
FBXW7/NF2	109850	106	732	186	10	5
FBXW7/SF3B1	114093	106	746	325	12	9
FBXW7/GATA1	78591	103	720	79	5	5
FBXW7/RUNX1	111000	105	743	251	17	17
FGFR1/FGFR2	127460	110	747	177	10	9
FGFR1/FGFR3	127460	110	747	203	10	11
FGFR1/FLT3	124504	109	746	214	13	14
FGFR1/GNA11	125645	110	746	108	7	10
FGFR1/GNAQ	125645	110	746	92	8	12
FGFR1/GNAS	126012	109	747	105	7	5
FGFR1/HNF1A	122419	109	746	176	12	13
FGFR1/HRAS	127460	110	747	79	6	10
FGFR1/IDH1	127870	110	748	143	6	9
FGFR1/JAK2	124025	110	746	162	10	10
FGFR1/JAK3	125873	110	748	208	11	10
FGFR1/KDR	123733	109	747	251	10	20
FGFR1/KIT	127460	110	747	201	12	15
FGFR1/KRAS	127870	110	748	335	2	1
FGFR1/MET	127069	110	747	273	16	21
FGFR1/MLH1	124914	109	747	156	10	12
FGFR1/MPL	123270	108	744	119	7	11
FGFR1/NOTCH1	125813	109	747	361	16	23
FGFR1/NPM1	121378	108	742	43	4	2
FGFR1/NRAS	127870	110	748	106	5	2
FGFR1/PDGFRA	125785	110	747	245	13	19
FGFR1/PIK3CA	127870	110	748	467	14	6
FGFR1/PTEN	126911	109	747	326	8	7
FGFR1/PTPN11	124787	109	747	151	11	13
FGFR1/RB1	124914	109	747	222	5	6
FGFR1/RET	127826	110	748	251	16	16
FGFR1/SMAD4	125968	109	747	176	10	4
FGFR1/SMARCB1	124524	109	747	112	10	10
FGFR1/SMO	124692	110	748	163	10	11
FGFR1/SRC	108926	109	745	83	10	8
FGFR1/STK11	125968	109	747	202	11	10
FGFR1/TP53	126911	109	747	924	5	5
FGFR1/VHL	122860	108	743	63	6	5
FGFR1/EZH2	118730	109	744	122	7	7
FGFR1/IDH2	122867	110	745	92	9	6
FGFR1/AKT2	108910	109	735	91	7	5
FGFR1/AKT3	109003	109	734	90	6	7
FGFR1/BRCA1	109352	110	737	213	12	11
FGFR1/BRCA2	108393	109	736	320	12	10
FGFR1/DDR2	111084	110	736	164	13	12
FGFR1/ERBB3	110678	110	737	216	12	11
FGFR1/FGFR4	110228	110	737	151	8	7
FGFR1/MAP2K1	112265	110	736	91	7	3
FGFR1/MTOR	110236	110	736	272	11	14
FGFR1/NF1	109688	110	737	441	13	19
FGFR1/NOTCH2	104425	107	725	238	12	13
FGFR1/PIK3R1	109719	109	736	196	7	4
FGFR1/ROS1	111973	110	741	326	13	18
FGFR1/TSC1	108744	109	736	176	7	4
FGFR1/TSC2	108744	109	736	244	9	11
FGFR1/CBL	107465	105	733	148	9	9
FGFR1/DNMT3A	106310	104	730	184	9	10
FGFR1/ESR1	110586	107	734	144	10	5
FGFR1/JAK1	97112	107	727	171	8	9
FGFR1/KMT2A	106261	104	730	322	12	11
FGFR1/MSH6	108285	105	732	237	12	16
FGFR1/MYC	108992	107	733	68	5	2
FGFR1/NF2	107435	105	731	111	6	5
FGFR1/SF3B1	108475	105	732	181	9	5
FGFR1/GATA1	77010	103	708	46	3	4
FGFR1/RUNX1	105382	104	729	122	6	7
FGFR2/FGFR3	127460	110	747	251	11	13
FGFR2/FLT3	124763	109	746	284	13	16
FGFR2/GNA11	125904	110	747	114	4	7
FGFR2/GNAQ	126402	110	746	116	9	11
FGFR2/GNAS	126359	109	746	124	8	9
FGFR2/HNF1A	122419	109	746	190	7	13
FGFR2/HRAS	127719	110	747	114	10	9
FGFR2/IDH1	127460	110	747	169	12	7
FGFR2/JAK2	125041	110	747	198	10	8
FGFR2/JAK3	125463	110	747	245	12	10
FGFR2/KDR	123582	109	746	362	11	17
FGFR2/KIT	128476	110	747	252	12	15
FGFR2/KRAS	128476	110	747	341	4	3
FGFR2/MET	126918	110	746	344	14	14
FGFR2/MLH1	125261	109	746	203	10	12
FGFR2/MPL	122860	108	743	167	13	16
FGFR2/NOTCH1	126419	109	746	433	15	16
FGFR2/NPM1	121378	108	742	52	8	1
FGFR2/NRAS	128217	110	747	190	6	4
FGFR2/PDGFRA	126044	110	747	274	10	13
FGFR2/PIK3CA	128476	110	747	656	13	9
FGFR2/PTEN	127517	109	746	600	13	10
FGFR2/PTPN11	125393	109	746	167	11	8
FGFR2/RB1	125261	109	746	293	12	10
FGFR2/RET	127675	110	747	301	11	18
FGFR2/SMAD4	126315	109	746	209	11	6
FGFR2/SMARCB1	124114	109	746	122	9	11
FGFR2/SMO	125298	110	747	216	12	12
FGFR2/SRC	108775	109	744	103	10	14
FGFR2/STK11	126315	109	746	220	5	6
FGFR2/TP53	127517	109	746	997	6	4
FGFR2/VHL	123119	108	743	64	5	1
FGFR2/EZH2	118730	109	744	162	11	12
FGFR2/IDH2	122867	110	745	100	9	6
FGFR2/AKT2	108910	109	735	92	8	5
FGFR2/AKT3	109003	109	734	122	6	8
FGFR2/BRCA1	109958	110	736	235	7	8
FGFR2/BRCA2	108999	109	735	417	16	18
FGFR2/DDR2	111841	110	736	188	8	7
FGFR2/ERBB3	111025	110	736	233	6	6
FGFR2/FGFR4	110228	110	737	180	9	8
FGFR2/MAP2K1	112265	110	736	98	5	1
FGFR2/MTOR	111252	110	736	311	13	15
FGFR2/NF1	110035	110	736	502	12	17
FGFR2/NOTCH2	104772	107	724	276	14	14
FGFR2/PIK3R1	109309	109	735	300	9	8
FGFR2/ROS1	111563	110	740	445	14	16
FGFR2/TSC1	109091	109	735	242	8	10
FGFR2/TSC2	109091	109	735	269	6	8
FGFR2/CBL	107812	105	732	219	11	13
FGFR2/DNMT3A	106657	104	729	248	11	16
FGFR2/ESR1	110933	107	733	181	8	10
FGFR2/JAK1	97869	107	727	248	13	10
FGFR2/KMT2A	106867	104	729	395	12	17
FGFR2/MSH6	107875	105	731	248	11	14
FGFR2/MYC	108582	107	732	86	6	2
FGFR2/NF2	107435	105	731	130	6	5
FGFR2/SF3B1	108475	105	732	211	5	8
FGFR2/GATA1	77010	103	708	57	5	3
FGFR2/RUNX1	105382	104	729	150	8	9
FGFR3/FLT3	124504	109	746	264	14	19
FGFR3/GNA11	125645	110	746	197	13	15
FGFR3/GNAQ	125645	110	746	105	6	8
FGFR3/GNAS	125602	109	746	137	10	6
FGFR3/HNF1A	122419	109	746	248	16	18
FGFR3/HRAS	127460	110	747	137	9	11
FGFR3/IDH1	127460	110	747	160	7	5
FGFR3/JAK2	124025	110	746	198	10	13
FGFR3/JAK3	125463	110	747	266	16	14
FGFR3/KDR	123323	109	746	344	12	19
FGFR3/KIT	127460	110	747	228	11	12
FGFR3/KRAS	127460	110	747	359	4	2
FGFR3/MET	126659	110	746	310	11	15
FGFR3/MLH1	124504	109	746	165	9	9
FGFR3/MPL	122860	108	743	160	9	7
FGFR3/NOTCH1	125403	109	746	486	16	22
FGFR3/NPM1	121378	108	742	70	7	7
FGFR3/NRAS	127460	110	747	181	8	2
FGFR3/PDGFRA	125785	110	747	244	13	12
FGFR3/PIK3CA	127460	110	747	736	13	10
FGFR3/PTEN	126501	109	746	452	13	10
FGFR3/PTPN11	124377	109	746	122	10	10
FGFR3/RB1	124504	109	746	302	14	11
FGFR3/RET	127416	110	747	301	16	19
FGFR3/SMAD4	125558	109	746	206	10	9
FGFR3/SMARCB1	124114	109	746	146	10	7
FGFR3/SMO	124282	110	747	235	13	17
FGFR3/SRC	108516	109	744	125	18	14
FGFR3/STK11	125558	109	746	223	13	10
FGFR3/TP53	126501	109	746	1120	5	5
FGFR3/VHL	122860	108	743	92	8	4
FGFR3/EZH2	118730	109	744	125	8	8
FGFR3/IDH2	122867	110	745	113	6	7
FGFR3/AKT2	108910	109	735	106	5	6
FGFR3/AKT3	109003	109	734	98	4	4
FGFR3/BRCA1	108942	110	736	244	12	8
FGFR3/BRCA2	107983	109	735	390	11	11
FGFR3/DDR2	111084	110	736	172	8	8
FGFR3/ERBB3	110268	110	736	258	9	8
FGFR3/FGFR4	110228	110	737	199	8	9
FGFR3/MAP2K1	112265	110	736	93	5	2
FGFR3/MTOR	110236	110	736	338	12	13
FGFR3/NF1	109278	110	736	453	13	15
FGFR3/NOTCH2	104015	107	724	270	13	11
FGFR3/PIK3R1	109309	109	735	210	10	2
FGFR3/ROS1	111563	110	740	375	12	11
FGFR3/TSC1	108334	109	735	289	8	8
FGFR3/TSC2	108334	109	735	278	10	9
FGFR3/CBL	107055	105	732	162	10	9
FGFR3/DNMT3A	105900	104	729	216	8	9
FGFR3/ESR1	110176	107	733	152	8	9
FGFR3/JAK1	97112	107	727	212	10	9
FGFR3/KMT2A	105851	104	729	418	15	16
FGFR3/MSH6	107875	105	731	276	9	13
FGFR3/MYC	108582	107	732	84	4	4
FGFR3/NF2	107435	105	731	122	7	3
FGFR3/SF3B1	108475	105	732	214	3	4
FGFR3/GATA1	77010	103	708	57	5	5
FGFR3/RUNX1	105382	104	729	148	8	7
FLT3/GNA11	122948	109	746	153	11	14
FLT3/GNAQ	122689	109	745	138	9	9
FLT3/GNAS	125938	109	754	213	17	19
FLT3/HNF1A	122419	109	746	220	14	15
FLT3/HRAS	130381	110	758	129	16	14
FLT3/IDH1	127808	109	757	501	16	25
FLT3/JAK2	126484	109	757	412	18	27
FLT3/JAK3	126085	109	756	499	25	37
FLT3/KDR	123683	109	746	464	13	22
FLT3/KIT	127966	109	757	423	21	29
FLT3/KRAS	130482	110	758	588	14	15
FLT3/MET	123962	109	745	361	12	18
FLT3/MLH1	124504	109	746	189	11	17
FLT3/MPL	126063	108	754	198	5	9
FLT3/NOTCH1	128860	110	757	740	26	45
FLT3/NPM1	124682	108	753	533	22	34
FLT3/NRAS	130223	110	758	528	19	21
FLT3/PDGFRA	125723	109	756	646	22	33
FLT3/PIK3CA	127279	110	747	568	15	12
FLT3/PTEN	130381	110	758	425	10	11
FLT3/PTPN11	126785	109	757	261	20	21
FLT3/RB1	127167	110	749	362	10	16
FLT3/RET	124864	109	746	332	14	18
FLT3/SMAD4	126919	110	747	234	13	14
FLT3/SMARCB1	126529	110	747	146	13	14
FLT3/SMO	123683	109	746	240	11	18
FLT3/SRC	108775	109	744	127	11	13
FLT3/STK11	126919	110	747	233	12	13
FLT3/TP53	130482	110	758	1544	20	26
FLT3/VHL	123119	108	743	84	10	5
FLT3/EZH2	121933	109	755	462	20	28
FLT3/IDH2	123215	109	755	327	16	21
FLT3/AKT2	111382	110	736	102	7	6
FLT3/AKT3	108959	109	734	165	7	11
FLT3/BRCA1	110657	110	736	314	14	21
FLT3/BRCA2	110758	110	736	506	15	21
FLT3/DDR2	108128	109	735	245	11	13
FLT3/ERBB3	111825	110	736	274	12	13
FLT3/FGFR4	109269	109	736	220	11	14
FLT3/MAP2K1	109456	109	738	129	8	7
FLT3/MTOR	108593	109	735	382	12	20
FLT3/NF1	110881	110	739	629	14	20
FLT3/NOTCH2	104116	107	724	363	12	18
FLT3/PIK3R1	111871	110	739	270	9	15
FLT3/ROS1	112177	110	740	561	17	25
FLT3/TSC1	108435	109	735	252	11	15
FLT3/TSC2	108334	109	735	307	15	14
FLT3/CBL	110359	105	745	429	21	33
FLT3/DNMT3A	109204	104	742	531	14	21
FLT3/ESR1	108465	105	734	200	11	11
FLT3/JAK1	98715	106	729	238	13	17
FLT3/KMT2A	107792	104	741	567	18	35
FLT3/MSH6	108022	105	734	323	14	22
FLT3/MYC	107623	105	730	80	7	2
FLT3/NF2	109850	106	732	167	7	11
FLT3/SF3B1	113039	106	746	595	20	31
FLT3/GATA1	78591	103	720	60	4	6
FLT3/RUNX1	111000	105	743	578	21	28
GNA11/GNAQ	125645	110	746	66	8	13
GNA11/GNAS	123787	109	745	69	5	6
GNA11/HNF1A	120604	109	745	106	11	10
GNA11/HRAS	125904	110	747	90	9	8
GNA11/IDH1	125645	110	746	73	5	3
GNA11/JAK2	122770	110	747	95	7	6
GNA11/JAK3	123648	110	746	123	10	12
GNA11/KDR	121767	109	746	159	13	14
GNA11/KIT	125904	110	747	128	10	8
GNA11/KRAS	125904	110	747	184	1	1
GNA11/MET	125103	110	746	136	8	8
GNA11/MLH1	122689	109	745	87	5	8
GNA11/MPL	121045	108	742	87	10	7
GNA11/NOTCH1	123847	109	746	217	10	12
GNA11/NPM1	119864	108	742	45	5	9
GNA11/NRAS	125645	110	746	92	8	8
GNA11/PDGFRA	124229	110	747	119	7	6
GNA11/PIK3CA	125904	110	747	238	6	6
GNA11/PTEN	124945	109	746	212	9	5
GNA11/PTPN11	122821	109	746	66	7	5
GNA11/RB1	122689	109	745	153	7	6
GNA11/RET	125860	110	747	156	11	14
GNA11/SMAD4	123743	109	745	110	9	9
GNA11/SMARCB1	122299	109	745	80	9	7
GNA11/SMO	122726	110	747	160	11	15
GNA11/SRC	106960	109	744	64	9	5
GNA11/STK11	123743	109	745	129	8	8
GNA11/TP53	124945	109	746	489	2	2
GNA11/VHL	121304	108	743	61	8	4
GNA11/EZH2	118429	109	743	68	5	6
GNA11/IDH2	122566	110	744	56	4	6
GNA11/AKT2	108609	109	734	47	5	4
GNA11/AKT3	109003	109	734	54	6	4
GNA11/BRCA1	108900	110	736	98	4	6
GNA11/BRCA2	107941	109	735	158	6	8
GNA11/DDR2	110783	110	735	85	8	10
GNA11/ERBB3	109967	110	735	107	5	7
GNA11/FGFR4	109927	110	736	88	4	4
GNA11/MAP2K1	111964	110	735	51	4	4
GNA11/MTOR	110194	110	736	134	7	9
GNA11/NF1	108977	110	735	200	6	12
GNA11/NOTCH2	103714	107	723	99	4	4
GNA11/PIK3R1	109008	109	734	99	5	3
GNA11/ROS1	111262	110	739	148	7	5
GNA11/TSC1	108033	109	734	88	4	4
GNA11/TSC2	108033	109	734	137	5	5
GNA11/CBL	106754	104	730	68	3	5
GNA11/DNMT3A	105599	104	728	114	7	11
GNA11/ESR1	109875	107	732	82	4	5
GNA11/JAK1	96811	107	726	96	5	7
GNA11/KMT2A	105809	104	729	157	8	7
GNA11/MSH6	107574	105	730	108	6	8
GNA11/MYC	108582	107	732	40	3	2
GNA11/NF2	107134	104	729	58	5	4
GNA11/SF3B1	108174	104	730	138	6	7
GNA11/GATA1	77010	103	708	28	4	3
GNA11/RUNX1	105081	103	727	65	5	6
GNAQ/GNAS	124544	109	745	61	6	7
GNAQ/HNF1A	120604	109	745	80	10	7
GNAQ/HRAS	125645	110	746	60	9	10
GNAQ/IDH1	125645	110	746	57	2	2
GNAQ/JAK2	123268	110	746	93	11	4
GNAQ/JAK3	123648	110	746	109	9	12
GNAQ/KDR	121508	109	745	137	7	9
GNAQ/KIT	126402	110	746	138	8	12
GNAQ/KRAS	126402	110	746	121	1	0
GNAQ/MET	124844	110	745	134	9	12
GNAQ/MLH1	123446	109	745	89	8	9
GNAQ/MPL	121045	108	742	75	8	7
GNAQ/NOTCH1	124345	109	745	181	11	18
GNAQ/NPM1	119864	108	742	32	6	3
GNAQ/NRAS	126402	110	746	73	7	3
GNAQ/PDGFRA	123970	110	746	107	6	6
GNAQ/PIK3CA	126402	110	746	227	7	10
GNAQ/PTEN	125443	109	745	191	7	6
GNAQ/PTPN11	123319	109	745	81	7	9
GNAQ/RB1	123446	109	745	153	8	9
GNAQ/RET	125601	110	746	130	9	12
GNAQ/SMAD4	124500	109	745	116	9	8
GNAQ/SMARCB1	122299	109	745	72	9	10
GNAQ/SMO	123224	110	746	103	9	14
GNAQ/SRC	106701	109	743	50	8	7
GNAQ/STK11	124500	109	745	104	9	11
GNAQ/TP53	125443	109	745	336	4	2
GNAQ/VHL	121045	108	742	43	7	9
GNAQ/EZH2	118429	109	743	76	7	10
GNAQ/IDH2	122566	110	744	51	8	10
GNAQ/AKT2	108609	109	734	45	3	6
GNAQ/AKT3	109003	109	734	48	4	5
GNAQ/BRCA1	109398	110	735	109	7	8
GNAQ/BRCA2	108439	109	734	154	6	8
GNAQ/DDR2	111540	110	735	89	6	7
GNAQ/ERBB3	110724	110	735	94	5	6
GNAQ/FGFR4	109927	110	736	71	6	7
GNAQ/MAP2K1	111964	110	735	54	6	4
GNAQ/MTOR	110692	110	735	126	4	7
GNAQ/NF1	109734	110	735	167	7	9
GNAQ/NOTCH2	104471	107	723	102	5	8
GNAQ/PIK3R1	109008	109	734	96	4	4
GNAQ/ROS1	111262	110	739	146	6	11
GNAQ/TSC1	108790	109	734	93	5	6
GNAQ/TSC2	108790	109	734	91	4	7
GNAQ/CBL	107511	104	730	81	5	5
GNAQ/DNMT3A	106356	104	728	90	7	8
GNAQ/ESR1	110632	107	732	71	4	8
GNAQ/JAK1	97568	107	726	81	6	4
GNAQ/KMT2A	106307	104	728	139	7	13
GNAQ/MSH6	107574	105	730	102	6	12
GNAQ/MYC	108582	107	732	40	3	5
GNAQ/NF2	107134	104	729	59	4	3
GNAQ/SF3B1	108174	104	730	144	6	7
GNAQ/GATA1	77010	103	708	27	4	3
GNAQ/RUNX1	105081	103	727	69	6	5
GNAS/HNF1A	122419	109	746	129	9	15
GNAS/HRAS	127036	109	754	65	6	6
GNAS/IDH1	127446	109	755	172	13	10
GNAS/JAK2	125271	109	753	176	11	12
GNAS/JAK3	126348	109	755	188	14	13
GNAS/KDR	123747	109	747	172	7	8
GNAS/KIT	127807	109	754	180	11	16
GNAS/KRAS	128217	109	755	741	13	16
GNAS/MET	125225	109	746	168	8	11
GNAS/MLH1	125671	109	747	107	3	5
GNAS/MPL	124704	108	752	82	5	4
GNAS/NOTCH1	127119	109	755	322	15	19
GNAS/NPM1	122812	108	750	90	9	10
GNAS/NRAS	128203	109	755	150	9	8
GNAS/PDGFRA	125361	109	754	224	18	16
GNAS/PIK3CA	126783	109	747	378	7	6
GNAS/PTEN	128203	109	755	232	5	4
GNAS/PTPN11	126978	109	755	101	10	8
GNAS/RB1	125685	109	747	189	4	6
GNAS/RET	125968	109	747	152	9	12
GNAS/SMAD4	126739	109	747	209	8	3
GNAS/SMARCB1	124524	109	747	64	3	4
GNAS/SMO	124490	109	747	116	9	10
GNAS/SRC	108926	109	745	70	10	7
GNAS/STK11	126725	109	747	122	5	5
GNAS/TP53	128217	109	755	770	10	7
GNAS/VHL	122874	108	743	31	0	0
GNAS/EZH2	120164	109	752	160	10	13
GNAS/IDH2	122457	109	752	125	13	13
GNAS/AKT2	108910	109	735	57	3	3
GNAS/AKT3	109003	109	734	71	4	5
GNAS/BRCA1	109164	109	736	161	8	5
GNAS/BRCA2	109164	109	736	239	8	10
GNAS/DDR2	109983	109	735	124	6	9
GNAS/ERBB3	110476	109	736	153	6	7
GNAS/FGFR4	109283	109	736	117	6	6
GNAS/MAP2K1	110407	109	735	59	4	5
GNAS/MTOR	109135	109	735	207	10	12
GNAS/NF1	109500	109	736	245	6	6
GNAS/NOTCH2	105196	107	725	156	9	6
GNAS/PIK3R1	109719	109	736	139	6	3
GNAS/ROS1	110115	109	740	195	6	8
GNAS/TSC1	109515	109	736	111	6	6
GNAS/TSC2	109515	109	736	179	9	7
GNAS/CBL	109656	105	742	146	12	12
GNAS/DNMT3A	108501	104	739	173	7	8
GNAS/ESR1	109499	105	732	88	3	3
GNAS/JAK1	96924	105	725	128	7	8
GNAS/KMT2A	108466	104	739	264	16	12
GNAS/MSH6	108285	105	732	179	8	11
GNAS/MYC	108033	105	731	48	2	3
GNAS/NF2	107435	105	731	82	4	3
GNAS/SF3B1	109909	105	741	206	12	15
GNAS/GATA1	78444	103	717	33	5	3
GNAS/RUNX1	106816	104	738	164	11	10
HNF1A/HRAS	122419	109	746	86	7	10
HNF1A/IDH1	122419	109	746	126	8	5
HNF1A/JAK2	122118	109	745	160	9	12
HNF1A/JAK3	122419	109	746	216	12	14
HNF1A/KDR	122419	109	746	278	15	11
HNF1A/KIT	122419	109	746	191	15	16
HNF1A/KRAS	122419	109	746	315	3	1
HNF1A/MET	121618	109	745	254	15	12
HNF1A/MLH1	122419	109	746	180	9	11
HNF1A/MPL	120775	108	742	144	11	15
HNF1A/NOTCH1	122419	109	746	423	18	27
HNF1A/NPM1	120474	108	741	52	8	5
HNF1A/NRAS	122419	109	746	117	6	3
HNF1A/PDGFRA	121798	109	746	222	9	15
HNF1A/PIK3CA	122419	109	746	450	10	6
HNF1A/PTEN	122419	109	746	330	12	6
HNF1A/PTPN11	122419	109	746	109	6	6
HNF1A/RB1	122419	109	746	234	10	13
HNF1A/RET	122419	109	746	237	11	13
HNF1A/SMAD4	122419	109	746	170	8	7
HNF1A/SMARCB1	122419	109	746	102	12	11
HNF1A/SMO	122419	109	746	182	12	15
HNF1A/SRC	106431	109	744	101	15	10
HNF1A/STK11	122419	109	746	166	10	13
HNF1A/TP53	122419	109	746	877	6	4
HNF1A/VHL	120775	108	742	62	6	3
HNF1A/EZH2	117826	109	744	115	8	6
HNF1A/IDH2	117826	109	744	94	8	3
HNF1A/AKT2	106781	109	735	101	5	6
HNF1A/AKT3	106874	109	734	97	12	5
HNF1A/BRCA1	106718	109	735	214	9	14
HNF1A/BRCA2	106718	109	735	358	12	20
HNF1A/DDR2	107224	109	735	174	10	16
HNF1A/ERBB3	107224	109	735	216	10	14
HNF1A/FGFR4	108025	109	736	188	9	12
HNF1A/MAP2K1	107224	109	735	90	5	6
HNF1A/MTOR	107224	109	735	298	11	18
HNF1A/NF1	107224	109	735	434	15	16
HNF1A/NOTCH2	102513	107	722	253	12	15
HNF1A/PIK3R1	107224	109	735	195	8	7
HNF1A/ROS1	108785	109	739	340	10	17
HNF1A/TSC1	107224	109	735	180	8	10
HNF1A/TSC2	107224	109	735	259	13	14
HNF1A/CBL	106151	105	731	158	10	8
HNF1A/DNMT3A	104996	104	728	211	11	18
HNF1A/ESR1	106233	105	731	138	7	8
HNF1A/JAK1	94068	105	724	238	11	14
HNF1A/KMT2A	104947	104	728	365	14	22
HNF1A/MSH6	105790	105	731	255	12	16
HNF1A/MYC	105538	105	730	87	6	4
HNF1A/NF2	105350	105	730	106	7	6
HNF1A/SF3B1	106545	105	731	161	6	6
HNF1A/GATA1	74925	103	706	56	6	4
HNF1A/RUNX1	103297	104	727	113	6	4
HRAS/IDH1	130663	110	758	85	11	8
HRAS/JAK2	127487	110	758	76	7	7
HRAS/JAK3	127044	110	757	126	18	14
HRAS/KDR	123582	109	746	138	10	6
HRAS/KIT	130922	110	758	113	7	11
HRAS/KRAS	133337	111	759	159	4	3
HRAS/MET	126918	110	746	117	7	8
HRAS/MLH1	124504	109	746	62	5	4
HRAS/MPL	126063	108	754	64	7	4
HRAS/NOTCH1	129658	110	757	239	16	14
HRAS/NPM1	124581	108	753	48	8	6
HRAS/NRAS	133078	111	759	88	9	6
HRAS/PDGFRA	127625	110	757	123	13	11
HRAS/PIK3CA	130134	111	748	300	11	8
HRAS/PTEN	132378	110	758	198	7	7
HRAS/PTPN11	127839	109	757	59	4	4
HRAS/RB1	127066	110	749	148	9	6
HRAS/RET	127675	110	747	135	10	10
HRAS/SMAD4	127973	110	747	103	7	6
HRAS/SMARCB1	126529	110	747	66	8	8
HRAS/SMO	124541	110	747	124	8	10
HRAS/SRC	108775	109	744	42	7	0
HRAS/STK11	127973	110	747	111	8	9
HRAS/TP53	132378	110	758	494	7	2
HRAS/VHL	123119	108	743	54	5	7
HRAS/EZH2	121933	109	755	67	7	6
HRAS/IDH2	126070	110	756	57	8	8
HRAS/AKT2	111325	110	736	31	3	3
HRAS/AKT3	109003	109	734	32	2	3
HRAS/BRCA1	111616	111	737	86	4	4
HRAS/BRCA2	110657	110	736	133	4	7
HRAS/DDR2	111084	110	736	72	5	3
HRAS/ERBB3	112683	111	737	91	3	4
HRAS/FGFR4	110228	110	737	66	4	5
HRAS/MAP2K1	112412	110	739	37	4	0
HRAS/MTOR	110495	110	736	108	3	4
HRAS/NF1	111840	111	740	178	6	6
HRAS/NOTCH2	104015	107	724	93	6	2
HRAS/PIK3R1	111871	110	739	77	2	1
HRAS/ROS1	113978	111	741	134	6	5
HRAS/TSC1	108334	109	735	71	5	3
HRAS/TSC2	108334	109	735	98	4	4
HRAS/CBL	110258	105	745	76	10	7
HRAS/DNMT3A	109103	104	742	97	6	5
HRAS/ESR1	110323	107	736	55	2	3
HRAS/JAK1	99674	108	731	81	5	5
HRAS/KMT2A	107691	104	741	139	8	5
HRAS/MSH6	108022	105	734	103	6	5
HRAS/MYC	108582	107	732	33	4	4
HRAS/NF2	109850	106	732	42	4	3
HRAS/SF3B1	114093	106	746	95	8	6
HRAS/GATA1	78591	103	720	17	2	2
HRAS/RUNX1	111000	105	743	73	10	7
IDH1/JAK2	127228	110	757	313	14	18
IDH1/JAK3	127454	110	758	354	18	22
IDH1/KDR	123834	109	747	208	11	10
IDH1/KIT	130663	110	758	331	19	20
IDH1/KRAS	131174	110	759	460	9	14
IDH1/MET	127069	110	747	226	10	12
IDH1/MLH1	124914	109	747	137	4	4
IDH1/MPL	126473	108	755	124	10	8
IDH1/NOTCH1	127495	109	757	685	21	29
IDH1/NPM1	124682	108	753	372	17	23
IDH1/NRAS	131174	110	759	457	14	17
IDH1/PDGFRA	127366	110	757	505	22	29
IDH1/PIK3CA	127971	110	748	463	7	5
IDH1/PTEN	130114	109	758	265	4	4
IDH1/PTPN11	127990	109	758	165	10	10
IDH1/RB1	125162	109	749	210	4	2
IDH1/RET	127927	110	748	190	12	6
IDH1/SMAD4	125968	109	747	128	2	2
IDH1/SMARCB1	124524	109	747	93	6	6
IDH1/SMO	124793	110	748	130	5	6
IDH1/SRC	108926	109	745	67	7	5
IDH1/STK11	125968	109	747	141	3	1
IDH1/TP53	130215	109	758	2023	15	25
IDH1/VHL	122860	108	743	40	0	0
IDH1/EZH2	121933	109	755	385	17	26
IDH1/IDH2	126171	110	756	252	15	18
IDH1/AKT2	109011	109	735	62	4	4
IDH1/AKT3	109003	109	734	82	5	2
IDH1/BRCA1	109352	110	737	170	5	6
IDH1/BRCA2	108494	109	736	288	8	8
IDH1/DDR2	111084	110	736	145	10	9
IDH1/ERBB3	110779	110	737	168	4	4
IDH1/FGFR4	110228	110	737	125	6	3
IDH1/MAP2K1	112412	110	739	80	3	3
IDH1/MTOR	110236	110	736	211	11	7
IDH1/NF1	109835	110	740	317	6	5
IDH1/NOTCH2	104526	107	725	180	7	5
IDH1/PIK3R1	109866	109	739	242	3	2
IDH1/ROS1	112074	110	741	286	9	8
IDH1/TSC1	108845	109	736	161	5	5
IDH1/TSC2	108744	109	736	204	3	4
IDH1/CBL	110769	105	746	315	18	22
IDH1/DNMT3A	109614	104	743	358	11	10
IDH1/ESR1	110733	107	737	114	5	2
IDH1/JAK1	97259	107	730	128	5	7
IDH1/KMT2A	107943	104	742	325	14	13
IDH1/MSH6	108432	105	735	206	6	6
IDH1/MYC	108992	107	733	57	2	1
IDH1/NF2	107435	105	731	101	3	3
IDH1/SF3B1	111678	105	745	452	14	18
IDH1/GATA1	78591	103	720	43	4	3
IDH1/RUNX1	108585	104	742	446	18	22
JAK2/JAK3	125562	110	756	322	15	24
JAK2/KDR	123295	109	746	301	12	15
JAK2/KIT	128258	110	758	289	14	22
JAK2/KRAS	128258	110	758	445	6	5
JAK2/MET	123497	110	746	258	11	15
JAK2/MLH1	123779	109	745	173	12	10
JAK2/MPL	124581	108	753	165	9	8
JAK2/NOTCH1	125633	109	756	486	18	21
JAK2/NPM1	124581	108	753	186	16	11
JAK2/NRAS	127985	110	757	327	13	9
JAK2/PDGFRA	125244	110	757	415	18	28
JAK2/PIK3CA	125055	110	747	483	13	5
JAK2/PTEN	127285	109	757	343	10	5
JAK2/PTPN11	127241	109	757	171	11	14
JAK2/RB1	123940	109	747	330	12	15
JAK2/RET	124240	110	747	234	12	13
JAK2/SMAD4	123793	109	745	157	7	5
JAK2/SMARCB1	122632	109	745	106	8	7
JAK2/SMO	124997	110	747	177	8	11
JAK2/SRC	107293	109	744	79	8	9
JAK2/STK11	123779	109	745	198	9	7
JAK2/TP53	127299	109	757	1227	14	17
JAK2/VHL	121651	108	743	58	8	4
JAK2/EZH2	121632	109	754	339	17	16
JAK2/IDH2	122649	110	755	215	12	15
JAK2/AKT2	107428	109	734	84	4	6
JAK2/AKT3	107822	109	734	117	4	7
JAK2/BRCA1	109310	110	736	224	10	10
JAK2/BRCA2	108351	109	735	382	16	18
JAK2/DDR2	109587	110	735	178	9	7
JAK2/ERBB3	109543	110	735	205	6	5
JAK2/FGFR4	109601	110	736	145	5	5
JAK2/MAP2K1	108977	110	738	78	2	6
JAK2/MTOR	109846	110	736	273	12	15
JAK2/NF1	109704	110	738	415	14	15
JAK2/NOTCH2	103859	107	723	243	12	9
JAK2/PIK3R1	107974	109	737	211	7	4
JAK2/ROS1	110363	110	739	355	12	15
JAK2/TSC1	108598	109	734	202	8	5
JAK2/TSC2	108598	109	734	263	11	8
JAK2/CBL	110714	104	743	331	19	20
JAK2/DNMT3A	109559	104	741	386	13	12
JAK2/ESR1	108713	107	735	150	6	3
JAK2/JAK1	96548	107	729	198	9	10
JAK2/KMT2A	108161	104	741	393	15	21
JAK2/MSH6	106540	105	733	267	12	13
JAK2/MYC	107401	107	732	64	3	2
JAK2/NF2	105953	104	729	134	9	7
JAK2/SF3B1	110323	104	743	411	15	17
JAK2/GATA1	77410	103	720	63	3	5
JAK2/RUNX1	107103	103	740	351	11	17
JAK3/KDR	123733	109	747	361	13	16
JAK3/KIT	127044	110	757	341	21	25
JAK3/KRAS	127454	110	758	528	8	11
JAK3/MET	125072	110	747	341	15	19
JAK3/MLH1	124914	109	747	204	9	18
JAK3/MPL	124851	108	754	184	13	14
JAK3/NOTCH1	126495	109	757	676	27	44
JAK3/NPM1	122959	108	752	226	16	24
JAK3/NRAS	127454	110	758	318	14	13
JAK3/PDGFRA	126423	110	757	488	27	34
JAK3/PIK3CA	125873	110	748	548	9	10
JAK3/PTEN	126495	109	757	402	12	10
JAK3/PTPN11	125314	109	757	169	14	11
JAK3/RB1	125061	109	749	331	11	13
JAK3/RET	125873	110	748	307	16	16
JAK3/SMAD4	124914	109	747	199	10	9
JAK3/SMARCB1	124524	109	747	107	6	5
JAK3/SMO	124692	110	748	231	10	16
JAK3/SRC	108926	109	745	124	13	13
JAK3/STK11	124914	109	747	213	10	11
JAK3/TP53	126495	109	757	1444	18	17
JAK3/VHL	122860	108	743	76	8	3
JAK3/EZH2	120311	109	754	339	22	24
JAK3/IDH2	122451	110	755	212	17	14
JAK3/AKT2	108866	109	735	92	4	5
JAK3/AKT3	108959	109	734	134	8	10
JAK3/BRCA1	109352	110	737	306	16	18
JAK3/BRCA2	108393	109	736	465	15	25
JAK3/DDR2	109087	110	736	222	13	12
JAK3/ERBB3	110678	110	737	262	10	11
JAK3/FGFR4	110228	110	737	200	11	14
JAK3/MAP2K1	110415	110	739	109	6	6
JAK3/MTOR	109293	110	736	346	12	16
JAK3/NF1	109835	110	740	530	16	24
JAK3/NOTCH2	104425	107	725	329	16	19
JAK3/PIK3R1	109866	109	739	239	8	10
JAK3/ROS1	111030	110	741	439	15	20
JAK3/TSC1	108744	109	736	228	10	8
JAK3/TSC2	108744	109	736	319	14	18
JAK3/CBL	109046	105	745	302	21	22
JAK3/DNMT3A	107891	104	742	333	15	16
JAK3/ESR1	109834	107	737	187	10	10
JAK3/JAK1	97259	107	730	263	15	14
JAK3/KMT2A	107842	104	742	509	17	31
JAK3/MSH6	108432	105	735	320	14	15
JAK3/MYC	108992	107	733	104	7	6
JAK3/NF2	107435	105	731	152	12	10
JAK3/SF3B1	109002	105	744	404	20	24
JAK3/GATA1	78591	103	720	70	7	5
JAK3/RUNX1	106963	104	741	364	21	26
KDR/KIT	123596	109	746	399	15	20
KDR/KRAS	124107	109	747	668	3	3
KDR/MET	123205	109	746	431	10	15
KDR/MLH1	123733	109	747	250	10	11
KDR/MPL	122089	108	744	213	9	7
KDR/NOTCH1	124107	109	747	619	16	28
KDR/NPM1	121479	108	742	91	9	9
KDR/NRAS	123834	109	747	249	5	3
KDR/PDGFRA	122961	109	746	477	14	29
KDR/PIK3CA	124107	109	747	728	15	12
KDR/PTEN	123992	109	747	534	12	12
KDR/PTPN11	123992	109	747	221	10	16
KDR/RB1	123848	109	747	452	12	16
KDR/RET	124093	109	747	443	18	25
KDR/SMAD4	123747	109	747	322	12	10
KDR/SMARCB1	123343	109	747	170	10	5
KDR/SMO	124093	109	747	314	15	15
KDR/SRC	108004	109	745	153	12	19
KDR/STK11	123733	109	747	328	11	11
KDR/TP53	124107	109	747	1896	11	8
KDR/VHL	121952	108	743	115	9	7
KDR/EZH2	118730	109	744	218	11	13
KDR/IDH2	118845	109	744	127	8	6
KDR/AKT2	107786	109	735	123	7	6
KDR/AKT3	107778	109	734	202	11	13
KDR/BRCA1	108305	109	736	364	13	12
KDR/BRCA2	108406	109	736	595	21	18
KDR/DDR2	108128	109	735	298	15	14
KDR/ERBB3	108639	109	736	323	14	15
KDR/FGFR4	108943	109	736	275	11	10
KDR/MAP2K1	108128	109	735	131	3	5
KDR/MTOR	108387	109	735	498	17	18
KDR/NF1	108552	109	736	790	18	25
KDR/NOTCH2	103914	107	725	413	12	14
KDR/PIK3R1	108538	109	736	299	7	7
KDR/ROS1	110172	109	740	678	15	26
KDR/TSC1	108653	109	736	298	10	8
KDR/TSC2	108552	109	736	370	13	12
KDR/CBL	107566	105	733	303	13	14
KDR/DNMT3A	106411	104	730	323	14	14
KDR/ESR1	107561	105	732	270	12	12
KDR/JAK1	94986	105	725	273	14	12
KDR/KMT2A	106635	104	730	610	15	24
KDR/MSH6	107104	105	732	359	12	18
KDR/MYC	106852	105	731	106	8	4
KDR/NF2	106254	105	731	196	9	8
KDR/SF3B1	107421	105	732	322	10	14
KDR/GATA1	75829	103	708	84	6	9
KDR/RUNX1	104201	104	729	213	10	10
KIT/KRAS	131693	110	758	506	9	10
KIT/MET	126932	110	746	323	12	17
KIT/MLH1	125261	109	746	179	13	12
KIT/MPL	126063	108	754	151	7	10
KIT/NOTCH1	128014	109	756	553	21	33
KIT/NPM1	124581	108	753	202	15	18
KIT/NRAS	131420	110	758	316	16	16
KIT/PDGFRA	127625	110	757	428	19	30
KIT/PIK3CA	128490	110	747	519	9	12
KIT/PTEN	130720	109	757	518	12	13
KIT/PTPN11	128596	109	757	183	14	16
KIT/RB1	125422	109	748	334	10	11
KIT/RET	127675	110	747	291	14	13
KIT/SMAD4	126329	109	746	243	7	8
KIT/SMARCB1	124114	109	746	132	11	12
KIT/SMO	125298	110	747	224	13	13
KIT/SRC	108775	109	744	110	12	22
KIT/STK11	126315	109	746	272	14	10
KIT/TP53	130734	109	757	1362	17	22
KIT/VHL	123133	108	743	84	7	6
KIT/EZH2	121933	109	755	296	15	25
KIT/IDH2	126084	110	756	182	13	14
KIT/AKT2	108910	109	735	85	7	5
KIT/AKT3	109003	109	734	129	6	9
KIT/BRCA1	109972	110	736	250	9	14
KIT/BRCA2	109013	109	735	386	11	12
KIT/DDR2	111841	110	736	218	14	17
KIT/ERBB3	111025	110	736	224	9	10
KIT/FGFR4	110242	110	737	166	11	6
KIT/MAP2K1	112412	110	739	89	7	3
KIT/MTOR	111252	110	736	312	11	15
KIT/NF1	110196	110	739	480	11	17
KIT/NOTCH2	104786	107	724	279	16	13
KIT/PIK3R1	109456	109	738	227	9	5
KIT/ROS1	111563	110	740	375	11	22
KIT/TSC1	109105	109	735	212	8	6
KIT/TSC2	109105	109	735	261	10	12
KIT/CBL	111015	105	745	297	16	22
KIT/DNMT3A	109860	104	742	285	7	11
KIT/ESR1	111094	107	736	170	7	12
KIT/JAK1	98030	107	730	193	9	12
KIT/KMT2A	108462	104	741	426	19	21
KIT/MSH6	108022	105	734	280	11	19
KIT/MYC	108582	107	732	69	4	3
KIT/NF2	107435	105	731	130	6	7
KIT/SF3B1	111678	105	745	405	15	25
KIT/GATA1	78591	103	720	59	6	4
KIT/RUNX1	108585	104	742	310	17	21
KRAS/MET	127342	110	747	474	2	2
KRAS/MLH1	125671	109	747	285	2	0
KRAS/MPL	126473	108	755	225	2	1
KRAS/NOTCH1	130940	110	758	937	10	12
KRAS/NPM1	124682	108	753	264	10	10
KRAS/NRAS	134346	111	760	479	12	12
KRAS/PDGFRA	127625	110	757	685	8	12
KRAS/PIK3CA	131416	111	749	2742	12	10
KRAS/PTEN	133545	110	759	1402	3	1
KRAS/PTPN11	129006	109	758	246	4	5
KRAS/RB1	128348	110	750	620	1	1
KRAS/RET	128186	110	748	552	7	1
KRAS/SMAD4	129154	110	748	2335	14	8
KRAS/SMARCB1	126939	110	748	201	2	2
KRAS/SMO	125809	110	748	437	4	4
KRAS/SRC	109185	109	745	158	1	1
KRAS/STK11	129140	110	748	1583	6	8
KRAS/TP53	133665	110	759	10336	16	15
KRAS/VHL	123133	108	743	116	0	0
KRAS/EZH2	121933	109	755	384	7	10
KRAS/IDH2	126185	110	756	280	7	6
KRAS/AKT2	111426	110	736	142	1	1
KRAS/AKT3	109003	109	734	204	1	1
KRAS/BRCA1	112797	111	738	470	1	1
KRAS/BRCA2	111939	110	737	809	3	2
KRAS/DDR2	111846	110	736	318	0	0
KRAS/ERBB3	113951	111	738	567	5	1
KRAS/FGFR4	110242	110	737	316	1	2
KRAS/MAP2K1	112412	110	739	138	1	0
KRAS/MTOR	111252	110	736	674	3	2
KRAS/NF1	113021	111	741	805	3	0
KRAS/NOTCH2	105297	107	725	474	3	0
KRAS/PIK3R1	112281	110	740	583	0	0
KRAS/ROS1	114489	111	742	590	2	2
KRAS/TSC1	109616	109	736	349	2	0
KRAS/TSC2	109515	109	736	545	0	0
KRAS/CBL	111526	105	746	382	9	6
KRAS/DNMT3A	110371	104	743	545	3	2
KRAS/ESR1	111504	107	737	323	0	1
KRAS/JAK1	100445	108	731	318	4	2
KRAS/KMT2A	108973	104	742	731	6	7
KRAS/MSH6	108432	105	735	437	2	1
KRAS/MYC	108992	107	733	154	3	2
KRAS/NF2	109850	106	732	233	2	0
KRAS/SF3B1	114093	106	746	672	9	10
KRAS/GATA1	78591	103	720	87	1	1
KRAS/RUNX1	111000	105	743	425	8	10
MET/MLH1	124113	109	746	245	10	18
MET/MPL	122469	108	743	214	12	14
MET/NOTCH1	125285	109	746	536	17	21
MET/NPM1	120577	108	741	74	8	8
MET/NRAS	127069	110	747	225	8	4
MET/PDGFRA	125243	110	746	365	13	16
MET/PIK3CA	127342	110	747	656	9	13
MET/PTEN	126369	109	746	547	14	10
MET/PTPN11	124245	109	746	200	10	14
MET/RB1	124127	109	746	424	9	12
MET/RET	127284	110	747	376	15	18
MET/SMAD4	125181	109	746	278	10	11
MET/SMARCB1	123723	109	746	151	9	6
MET/SMO	124150	110	747	270	12	16
MET/SRC	108384	109	744	121	15	12
MET/STK11	125167	109	746	279	9	10
MET/TP53	126383	109	746	1658	7	6
MET/VHL	122332	108	742	99	9	5
MET/EZH2	117929	109	743	197	11	12
MET/IDH2	122080	110	744	126	4	5
MET/AKT2	108910	109	735	127	6	9
MET/AKT3	109003	109	734	160	8	7
MET/BRCA1	109625	110	737	341	10	10
MET/BRCA2	108666	109	736	534	14	18
MET/DDR2	111084	110	736	269	8	13
MET/ERBB3	110678	110	737	318	10	12
MET/FGFR4	109441	110	736	244	7	9
MET/MAP2K1	112265	110	736	128	5	5
MET/MTOR	110495	110	736	406	12	15
MET/NF1	109702	110	737	697	14	20
MET/NOTCH2	104439	107	725	356	12	12
MET/PIK3R1	109719	109	736	289	7	2
MET/ROS1	111973	110	741	581	20	23
MET/TSC1	108758	109	736	282	9	9
MET/TSC2	108758	109	736	353	9	11
MET/CBL	106664	105	732	260	8	15
MET/DNMT3A	105509	104	729	271	9	10
MET/ESR1	110600	107	734	223	8	8
MET/JAK1	97126	107	727	279	12	12
MET/KMT2A	105733	104	729	520	13	16
MET/MSH6	108285	105	732	364	16	20
MET/MYC	108992	107	733	108	5	3
MET/NF2	107435	105	731	170	7	10
MET/SF3B1	107674	105	731	262	7	6
MET/GATA1	77010	103	708	63	5	4
MET/RUNX1	104581	104	728	175	7	6
MLH1/MPL	123270	108	744	117	5	11
MLH1/NOTCH1	125671	109	747	405	18	29
MLH1/NPM1	121378	108	742	38	3	3
MLH1/NRAS	125671	109	747	89	1	1
MLH1/PDGFRA	123883	109	746	227	13	19
MLH1/PIK3CA	125671	109	747	452	11	4
MLH1/PTEN	125671	109	747	339	9	9
MLH1/PTPN11	124490	109	747	127	11	11
MLH1/RB1	125671	109	747	225	6	8
MLH1/RET	124914	109	747	219	13	15
MLH1/SMAD4	125671	109	747	181	10	10
MLH1/SMARCB1	124524	109	747	112	12	10
MLH1/SMO	124490	109	747	180	8	11
MLH1/SRC	108926	109	745	89	10	9
MLH1/STK11	125671	109	747	149	9	4
MLH1/TP53	125671	109	747	786	9	9
MLH1/VHL	122860	108	743	61	4	5
MLH1/EZH2	118730	109	744	137	9	11
MLH1/IDH2	119911	109	744	78	7	9
MLH1/AKT2	108866	109	735	88	7	7
MLH1/AKT3	108959	109	734	98	9	3
MLH1/BRCA1	109150	109	736	244	12	17
MLH1/BRCA2	109150	109	736	394	17	26
MLH1/DDR2	108885	109	735	151	9	7
MLH1/ERBB3	110476	109	736	252	16	15
MLH1/FGFR4	109269	109	736	166	10	7
MLH1/MAP2K1	109309	109	735	103	8	8
MLH1/MTOR	109091	109	735	285	12	17
MLH1/NF1	109486	109	736	397	15	20
MLH1/NOTCH2	105182	107	725	214	7	12
MLH1/PIK3R1	109719	109	736	203	7	5
MLH1/ROS1	110071	109	740	311	9	19
MLH1/TSC1	109501	109	736	218	11	16
MLH1/TSC2	109501	109	736	258	13	12
MLH1/CBL	108222	105	733	164	10	15
MLH1/DNMT3A	107067	104	730	189	6	11
MLH1/ESR1	109485	105	732	153	9	6
MLH1/JAK1	96910	105	725	222	15	19
MLH1/KMT2A	107018	104	730	348	14	17
MLH1/MSH6	108285	105	732	279	16	22
MLH1/MYC	108033	105	731	70	4	3
MLH1/NF2	107435	105	731	107	5	5
MLH1/SF3B1	107421	105	732	171	11	7
MLH1/GATA1	77010	103	708	37	5	3
MLH1/RUNX1	105382	104	729	132	6	6
MPL/NOTCH1	124851	108	754	291	12	18
MPL/NPM1	124581	108	753	53	6	2
MPL/NRAS	126473	108	755	107	3	1
MPL/PDGFRA	123820	108	753	216	11	15
MPL/PIK3CA	123270	108	744	298	7	4
MPL/PTEN	126473	108	755	231	6	2
MPL/PTPN11	125292	108	755	106	10	5
MPL/RB1	123417	108	746	202	5	9
MPL/RET	123270	108	744	178	10	11
MPL/SMAD4	123270	108	744	121	9	5
MPL/SMARCB1	122880	108	744	79	7	8
MPL/SMO	122089	108	744	128	8	10
MPL/SRC	107282	108	742	63	8	6
MPL/STK11	123270	108	744	113	7	5
MPL/TP53	126473	108	755	657	6	5
MPL/VHL	122860	108	743	36	1	1
MPL/EZH2	120289	108	752	120	5	8
MPL/IDH2	121470	108	752	81	8	6
MPL/AKT2	107222	108	732	72	7	6
MPL/AKT3	107315	108	731	90	8	7
MPL/BRCA1	106749	108	733	187	11	15
MPL/BRCA2	106749	108	733	316	15	22
MPL/DDR2	106484	108	732	143	11	11
MPL/ERBB3	108075	108	733	174	14	8
MPL/FGFR4	107625	108	733	134	9	8
MPL/MAP2K1	107812	108	735	80	8	1
MPL/MTOR	106690	108	732	238	14	12
MPL/NF1	107232	108	736	335	11	18
MPL/NOTCH2	102781	105	721	204	9	10
MPL/PIK3R1	108222	108	736	150	7	5
MPL/ROS1	108427	108	737	281	9	15
MPL/TSC1	107100	108	733	151	7	7
MPL/TSC2	107100	108	733	192	9	9
MPL/CBL	109024	104	743	151	7	7
MPL/DNMT3A	109513	104	743	161	8	10
MPL/ESR1	107231	104	732	118	8	7
MPL/JAK1	94656	104	724	131	9	5
MPL/KMT2A	107842	104	742	289	14	16
MPL/MSH6	106788	104	732	185	10	10
MPL/MYC	106389	104	728	51	3	4
MPL/NF2	105791	104	728	96	9	4
MPL/SF3B1	108980	104	742	174	8	11
MPL/GATA1	78591	103	720	42	5	3
MPL/RUNX1	108585	104	742	139	11	10
NOTCH1/NPM1	123060	108	752	328	18	23
NOTCH1/NRAS	130667	110	758	518	17	17
NOTCH1/PDGFRA	126622	109	756	793	26	43
NOTCH1/PIK3CA	129359	110	748	1155	14	12
NOTCH1/PTEN	130825	110	758	750	16	11
NOTCH1/PTPN11	126330	109	757	276	15	14
NOTCH1/RB1	128348	110	750	619	13	12
NOTCH1/RET	126173	109	747	535	19	26
NOTCH1/SMAD4	128100	110	748	359	9	9
NOTCH1/SMARCB1	126939	110	748	225	12	10
NOTCH1/SMO	124850	109	747	394	15	19
NOTCH1/SRC	109185	109	745	202	18	13
NOTCH1/STK11	128086	110	748	355	9	11
NOTCH1/TP53	130940	110	758	3209	25	30
NOTCH1/VHL	123133	108	743	117	5	6
NOTCH1/EZH2	120311	109	754	516	26	33
NOTCH1/IDH2	122506	109	754	371	21	24
NOTCH1/AKT2	111382	110	736	166	5	8
NOTCH1/AKT3	108959	109	734	209	11	7
NOTCH1/BRCA1	111838	110	737	481	12	13
NOTCH1/BRCA2	111939	110	737	830	20	27
NOTCH1/DDR2	109784	109	735	369	14	15
NOTCH1/ERBB3	112992	110	737	515	15	17
NOTCH1/FGFR4	109283	109	736	364	11	11
NOTCH1/MAP2K1	110355	109	738	183	9	3
NOTCH1/MTOR	110249	109	735	677	19	23
NOTCH1/NF1	112062	110	740	934	17	28
NOTCH1/NOTCH2	105297	107	725	693	16	29
NOTCH1/PIK3R1	112281	110	740	462	9	8
NOTCH1/ROS1	113486	110	741	831	14	29
NOTCH1/TSC1	109616	109	736	442	14	17
NOTCH1/TSC2	109515	109	736	631	18	21
NOTCH1/CBL	109904	105	745	477	18	26
NOTCH1/DNMT3A	108749	104	742	589	20	19
NOTCH1/ESR1	110545	105	735	351	12	19
NOTCH1/JAK1	99486	106	729	437	18	15
NOTCH1/KMT2A	108973	104	742	885	23	37
NOTCH1/MSH6	108432	105	735	562	13	30
NOTCH1/MYC	108033	105	731	168	9	6
NOTCH1/NF2	109850	106	732	263	8	10
NOTCH1/SF3B1	111417	106	745	642	18	23
NOTCH1/GATA1	78591	103	720	117	13	5
NOTCH1/RUNX1	109378	105	742	568	23	24
NPM1/NRAS	124682	108	753	346	13	19
NPM1/PDGFRA	122338	108	752	304	16	19
NPM1/PIK3CA	121479	108	742	139	10	6
NPM1/PTEN	124581	108	753	108	6	4
NPM1/PTPN11	124581	108	753	130	6	8
NPM1/RB1	121626	108	744	77	6	3
NPM1/RET	121479	108	742	73	8	8
NPM1/SMAD4	121378	108	742	49	5	4
NPM1/SMARCB1	120988	108	742	33	4	4
NPM1/SMO	121479	108	742	57	6	5
NPM1/SRC	105390	108	740	24	2	1
NPM1/STK11	121378	108	742	57	7	5
NPM1/TP53	124682	108	753	513	11	14
NPM1/VHL	121378	108	742	22	3	0
NPM1/EZH2	119988	108	751	259	15	16
NPM1/IDH2	120089	108	751	245	14	18
NPM1/AKT2	105841	108	731	22	2	2
NPM1/AKT3	106134	108	731	25	2	2
NPM1/BRCA1	105677	108	731	62	5	5
NPM1/BRCA2	105778	108	731	97	6	5
NPM1/DDR2	106183	108	731	50	4	3
NPM1/ERBB3	106284	108	731	51	2	3
NPM1/FGFR4	106984	108	732	46	4	5
NPM1/MAP2K1	106330	108	734	20	2	1
NPM1/MTOR	106183	108	731	69	3	2
NPM1/NF1	106330	108	734	117	4	6
NPM1/NOTCH2	101545	105	719	58	4	2
NPM1/PIK3R1	106330	108	734	55	3	1
NPM1/ROS1	107817	108	735	84	6	2
NPM1/TSC1	106284	108	731	43	2	3
NPM1/TSC2	106183	108	731	56	3	2
NPM1/CBL	108414	103	740	199	12	18
NPM1/DNMT3A	108903	104	741	376	12	14
NPM1/ESR1	105339	104	730	30	2	3
NPM1/JAK1	93174	103	722	45	4	2
NPM1/KMT2A	107232	104	740	150	12	11
NPM1/MSH6	104896	104	730	65	4	2
NPM1/MYC	104798	104	727	28	1	1
NPM1/NF2	104309	103	726	39	6	2
NPM1/SF3B1	108679	103	740	305	14	19
NPM1/GATA1	77410	103	720	18	4	2
NPM1/RUNX1	107103	103	740	296	17	21
NRAS/PDGFRA	127366	110	757	440	15	21
NRAS/PIK3CA	131143	111	749	404	6	2
NRAS/PTEN	133286	110	759	387	7	5
NRAS/PTPN11	128747	109	758	191	6	6
NRAS/RB1	128334	110	750	178	4	3
NRAS/RET	127927	110	748	196	6	5
NRAS/SMAD4	129140	110	748	228	7	2
NRAS/SMARCB1	126939	110	748	69	2	1
NRAS/SMO	125550	110	748	131	6	6
[truncated: 852 more rows]

## Sheet: S2
Table S2. RB1/TP53 co-mutation enrichment analysis across 750 cancer types from AACR-GENIE v11.0 data
CANCER_TYPE_DETAILED	comutant	RB_mutant	TP53_mutant	total	co.ratio	rb.ratio	p53.ratio	TP53_mut_given_RB1_mut	RB1_mut_given_TP53_mut	p.adj	significant co-mutation
Basaloid Large Cell Carcinoma of the Lung	1	1	1	1	1	1	1	1	1
Small Cell Gallbladder Carcinoma	1	1	1	1	1	1	1	1	1
Mast Cell Sarcoma	1	1	1	1	1	1	1	1	1
Small Cell Bladder Cancer	29	32	38	44	0.66	0.73	0.86	0.91	0.76	0.62	no
Small Cell Lung Cancer	440	472	560	664	0.66	0.71	0.84	0.93	0.79	3.5e-05	yes
Combined Small Cell Lung Carcinoma	40	40	60	68	0.59	0.59	0.88	1	0.67	0.24	no
Small Cell Carcinoma of Unknown Primary	40	44	56	72	0.56	0.61	0.78	0.91	0.71	0.12	no
High-Grade Neuroendocrine Carcinoma of the Esophagus	1	1	2	2	0.5	0.5	1	1	0.5
Bladder/Urinary Tract	1	1	2	2	0.5	0.5	1	1	0.5
B-Cell Prolymphocytic Leukemia	1	1	2	2	0.5	0.5	1	1	0.5
Small Cell Carcinoma of the Stomach	2	2	4	5	0.4	0.4	0.8	1	0.5
Uterine Adenosquamous Carcinoma	2	2	2	5	0.4	0.4	0.4	1	1	0.39	no
High-Grade Neuroendocrine Carcinoma of the Ovary	2	2	3	5	0.4	0.4	0.6	1	0.67
Phyllodes Tumor of the Breast	2	2	3	5	0.4	0.4	0.6	1	0.67	0.75	no
High-Grade Neuroendocrine Carcinoma of the Stomach	2	2	3	5	0.4	0.4	0.6	1	0.67	0.39	no
Uterine Neuroendocrine Carcinoma	6	7	10	16	0.38	0.44	0.62	0.86	0.6	0.37	no
Pleomorphic Liposarcoma	20	23	43	53	0.38	0.43	0.81	0.87	0.47	0.78	no
Uterine Leiomyosarcoma	116	143	206	304	0.38	0.47	0.68	0.81	0.56	0.00052	yes
Prostate Neuroendocrine Carcinoma	19	25	34	53	0.36	0.47	0.64	0.76	0.56	0.39	no
Plasmacytoid/Signet Ring Cell Bladder Carcinoma	7	9	13	20	0.35	0.45	0.65	0.78	0.54	0.91	no
Leiomyosarcoma	193	237	339	546	0.35	0.43	0.62	0.81	0.57	2.2e-09	yes
Renal Small Cell Carcinoma	1	1	2	3	0.33	0.33	0.67	1	0.5
Breast Carcinoma with Signet Ring	1	1	2	3	0.33	0.33	0.67	1	0.5	0.91	no
Prostate Small Cell Carcinoma	16	24	27	54	0.3	0.44	0.5	0.67	0.59	0.99	no
Merkel Cell Carcinoma	92	109	114	317	0.29	0.34	0.36	0.84	0.81	3.5e-37	yes
Perivascular Epithelioid Cell Tumor	17	19	22	58	0.29	0.33	0.38	0.89	0.77	7.2e-06	yes
Head and Neck Neuroendocrine Carcinoma	7	9	9	25	0.28	0.36	0.36	0.78	0.78	0.0098	yes
Urethral Cancer	3	3	5	11	0.27	0.27	0.45	1	0.6	0.27	no
Uterine Undifferentiated Carcinoma	6	6	10	22	0.27	0.27	0.45	1	0.6	0.019	yes
Myxofibrosarcoma	29	37	59	112	0.26	0.33	0.53	0.78	0.49	0.0031	yes
Large Cell Neuroendocrine Carcinoma	57	63	147	218	0.26	0.29	0.67	0.9	0.39	0.00019	yes
Small Cell Glioblastoma	2	2	5	8	0.25	0.25	0.62	1	0.4	0.43	no
High-Grade Surface Osteosarcoma	2	3	6	8	0.25	0.38	0.75	0.67	0.33	0.93	no
High-Grade Neuroendocrine Carcinoma of the Colon and Rectum	34	37	90	134	0.25	0.28	0.67	0.92	0.38	0.0011	yes
Sinonasal Undifferentiated Carcinoma	4	4	9	17	0.24	0.24	0.53	1	0.44	0.4	no
Uterine Perivascular Epithelioid Cell Tumor	5	9	10	21	0.24	0.43	0.48	0.56	0.5	0.59	no
Undifferentiated Pleomorphic Sarcoma/Malignant Fibrous Histiocytoma/High-Grade Spindle Cell Sarcoma	86	101	217	354	0.24	0.29	0.61	0.85	0.4	6.2e-07	yes
Sebaceous Carcinoma	9	9	21	37	0.24	0.24	0.57	1	0.43	0.0075	yes
Pleomorphic Rhabdomyosarcoma	5	7	14	22	0.23	0.32	0.64	0.71	0.36	0.89	no
Neuroendocrine Carcinoma, NOS	63	83	133	270	0.23	0.31	0.49	0.76	0.47	2.2e-06	yes
Uterine Epithelioid Leiomyosarcoma	3	6	6	14	0.21	0.43	0.43	0.5	0.5	0.64	no
Solid Papillary Carcinoma of the Breast	4	5	5	20	0.2	0.25	0.25	0.8	0.8	0.075	no
Undifferentiated Stomach Adenocarcinoma	1	1	4	5	0.2	0.2	0.8	1	0.25
Breast Invasive Carcinosarcoma, NOS	1	2	2	5	0.2	0.4	0.4	0.5	0.5	0.93	no
Inflammatory Breast Cancer	3	3	11	15	0.2	0.2	0.73	1	0.27	0.57	no
Gliosarcoma	19	21	49	93	0.2	0.23	0.53	0.9	0.39	0.00079	yes
Undifferentiated Uterine Sarcoma	3	3	6	17	0.18	0.18	0.35	1	0.5	0.09	no
Breast	13	14	33	72	0.18	0.19	0.46	0.93	0.39	0.0097	yes
Small Cell Carcinoma of the Ovary	5	5	7	30	0.17	0.17	0.23	1	0.71	0.0003	yes
Nerve Sheath Tumor	1	1	1	6	0.17	0.17	0.17	1	1	0.57	no
Chromophobe Renal Cell Carcinoma	17	17	54	98	0.17	0.17	0.55	1	0.31	0.00013	yes
Cutaneous Squamous Cell Carcinoma	45	46	237	283	0.16	0.16	0.84	0.98	0.19	0.089	no
Bladder Urothelial Carcinoma	452	574	1440	2787	0.16	0.21	0.52	0.79	0.31	4.7e-52	yes
Ovarian Epithelial Tumor	19	24	77	125	0.15	0.19	0.62	0.79	0.25	0.046	yes
Lung Neuroendocrine Tumor	11	13	28	71	0.15	0.18	0.39	0.85	0.39	0.0029	yes
Glioblastoma	239	379	665	1765	0.14	0.21	0.38	0.63	0.36	6.2e-29	yes
Poorly Differentiated Carcinoma, NOS	54	63	253	392	0.14	0.16	0.65	0.86	0.21	0.0031	yes
Breast Mixed Ductal and Lobular Carcinoma	83	114	241	592	0.14	0.19	0.41	0.73	0.34	2e-11	yes
Uterine Sarcoma/Mesenchymal	4	8	14	28	0.14	0.29	0.5	0.5	0.29	0.57	no
Breast Invasive Mixed Mucinous Carcinoma	8	8	20	56	0.14	0.14	0.36	1	0.4	0.0011	yes
Ovarian Carcinosarcoma/Malignant Mixed Mesodermal Tumor	25	27	152	175	0.14	0.15	0.87	0.93	0.16	0.39	no
Well-Differentiated Neuroendocrine Tumors of the Stomach	1	1	2	7	0.14	0.14	0.29	1	0.5	0.53	no
Poorly Differentiated Non-Small Cell Lung Cancer	35	37	197	278	0.13	0.13	0.71	0.95	0.18	0.023	yes
Malignant Phyllodes Tumor of the Breast	5	6	20	39	0.13	0.15	0.51	0.83	0.25	0.27	no
Esophageal Poorly Differentiated Carcinoma	8	8	55	61	0.13	0.13	0.9	1	0.15	0.75	no
Esophageal Squamous Cell Carcinoma	35	37	233	266	0.13	0.14	0.88	0.95	0.15	0.68	no
Uterine Carcinosarcoma/Uterine Malignant Mixed Mullerian Tumor	64	69	390	480	0.13	0.14	0.81	0.93	0.16	0.17	no
Large Cell/Anaplastic Medulloblastoma	2	3	6	17	0.12	0.18	0.35	0.67	0.33	0.75	no
Squamous Cell Carcinoma, NOS	36	49	186	302	0.12	0.16	0.62	0.73	0.19	0.1	no
Osteosarcoma	39	60	137	326	0.12	0.18	0.42	0.65	0.28	0.00079	yes
Renal Non-Clear Cell Carcinoma	3	4	4	25	0.12	0.16	0.16	0.75	0.75	0.17	no
Head and Neck Squamous Cell Carcinoma of Unknown Primary	4	8	20	33	0.12	0.24	0.61	0.5	0.2	0.95	no
Invasive Breast Carcinoma	282	363	1198	2319	0.12	0.16	0.52	0.78	0.24	7.3e-26	yes
Urachal Carcinoma	1	1	4	8	0.12	0.12	0.5	1	0.25	0.91	no
Bone	1	1	2	8	0.12	0.12	0.25	1	0.5
B-Lymphoblastic Leukemia/Lymphoma with Hypodiploidy	1	1	4	8	0.12	0.12	0.5	1	0.25	0.83	no
Uterine Sarcoma, Other	4	6	14	38	0.11	0.16	0.37	0.67	0.29	0.23	no
Medullary Carcinoma of the Colon	2	3	7	19	0.11	0.16	0.37	0.67	0.29	0.55	no
Mixed Ovarian Carcinoma	9	10	50	82	0.11	0.12	0.61	0.9	0.18	0.35	no
High-Grade Serous Ovarian Cancer	327	334	2709	2966	0.11	0.11	0.91	0.98	0.12	0.00019	yes
Glioblastoma Multiforme	250	373	816	2266	0.11	0.16	0.36	0.67	0.31	8e-39	yes
Meningothelial Tumor	1	1	1	9	0.11	0.11	0.11	1	1	0.39	no
Spindle Cell Carcinoma of the Lung	1	1	5	9	0.11	0.11	0.56	1	0.2	1	no
Chondroblastic Osteosarcoma	2	3	9	18	0.11	0.17	0.5	0.67	0.22	0.95	no
Acinar Cell Carcinoma, NOS	1	1	2	9	0.11	0.11	0.22	1	0.5	0.91	no
Breast Lobular Carcinoma In Situ	1	1	4	9	0.11	0.11	0.44	1	0.25
Pituitary Carcinoma	1	1	3	9	0.11	0.11	0.33	1	0.33	0.49	no
Bladder Adenocarcinoma	13	18	68	116	0.11	0.16	0.59	0.72	0.19	0.45	no
Large Cell Lung Carcinoma	5	5	32	44	0.11	0.11	0.73	1	0.16	0.79	no
Breast Invasive Ductal Carcinoma	990	1223	4490	8694	0.11	0.14	0.52	0.81	0.22	1.6e-103	yes
Sarcoma, NOS	50	75	181	526	0.1	0.14	0.34	0.67	0.28	3.1e-08	yes
Ovarian Cancer, Other	6	8	37	62	0.1	0.13	0.6	0.75	0.16	0.45	no
Sarcomatoid Renal Cell Carcinoma	3	5	11	31	0.1	0.16	0.35	0.6	0.27	0.56	no
Lung Squamous Cell Carcinoma	168	186	1278	1693	0.1	0.11	0.75	0.9	0.13	0.0095	yes
Anaplastic Oligoastrocytoma	5	9	33	50	0.1	0.18	0.66	0.56	0.15	1	no
Hypopharynx Squamous Cell Carcinoma	3	3	24	30	0.1	0.1	0.8	1	0.12	0.89	no
Parathyroid Carcinoma	1	1	2	10	0.1	0.1	0.2	1	0.5	0.91	no
Skin Adnexal Carcinoma	3	3	12	29	0.1	0.1	0.41	1	0.25	0.23	no
Non-Small Cell Lung Cancer	116	134	689	1115	0.1	0.12	0.62	0.87	0.17	5.5e-08	yes
Cancer of Unknown Primary, NOS	20	23	110	229	0.09	0.1	0.48	0.87	0.18	0.00052	yes
Endometrioid Ovarian Cancer	18	22	54	205	0.09	0.11	0.26	0.82	0.33	1.5e-08	yes
Sweat Gland Carcinoma/Apocrine Eccrine Carcinoma	1	1	8	11	0.09	0.09	0.73	1	0.12	0.91	no
Angiocentric Glioma	1	2	1	11	0.09	0.18	0.09	0.5	1	0.57	no
Dedifferentiated Chondrosarcoma	2	2	13	22	0.09	0.09	0.59	1	0.15	0.62	no
Poorly Differentiated Vaginal Carcinoma	1	1	7	11	0.09	0.09	0.64	1	0.14	0.75	no
Osteoblastic Osteosarcoma	4	5	24	43	0.09	0.12	0.56	0.8	0.17	0.26	no
Breast Invasive Lobular Carcinoma	98	143	358	1294	0.08	0.11	0.28	0.69	0.27	1.8e-24	yes
Adrenocortical Carcinoma	16	26	54	208	0.08	0.12	0.26	0.62	0.3	0.0057	yes
Uterine Smooth Muscle Tumor of Uncertain Malignant Potential	1	1	5	13	0.08	0.08	0.38	1	0.2	0.52	no
Lung	1	1	3	13	0.08	0.08	0.23	1	0.33
High-Grade Glioma, NOS	30	49	155	379	0.08	0.13	0.41	0.61	0.19	0.0054	yes
Neuroendocrine Tumor, NOS	21	36	57	264	0.08	0.14	0.22	0.58	0.37	1.9e-05	yes
Other Uterine Tumor	1	1	5	12	0.08	0.08	0.42	1	0.2	0.75	no
Basal Cell Carcinoma	7	9	58	84	0.08	0.11	0.69	0.78	0.12	0.48	no
Soft Tissue Myoepithelial Carcinoma	2	2	4	24	0.08	0.08	0.17	1	0.5	0.11	no
Mammary Analogue Secretory Carcinoma of Salivary Gland Origin	2	4	3	24	0.08	0.17	0.12	0.5	0.67	0.2	no
Ampullary Carcinoma	11	16	92	169	0.07	0.09	0.54	0.69	0.12	0.34	no
Adenocarcinoma, NOS	69	101	536	1047	0.07	0.1	0.51	0.68	0.13	0.00063	yes
Lung Adenocarcinoma	890	1091	6425	13416	0.07	0.08	0.48	0.82	0.14	2.2e-127	yes
Giant Cell Tumor of Bone	1	1	2	15	0.07	0.07	0.13	1	0.5	0.4	no
Solitary Fibrous Tumor/Hemangiopericytoma	9	12	37	134	0.07	0.09	0.28	0.75	0.24	0.00033	yes
Cancer of Unknown Primary	73	95	469	1082	0.07	0.09	0.43	0.77	0.16	5.5e-09	yes
Uterine Mixed Endometrial Carcinoma	9	16	97	132	0.07	0.12	0.73	0.56	0.09	1	no
Breast Invasive Cancer, NOS	23	26	142	334	0.07	0.08	0.43	0.88	0.16	1.9e-05	yes
Bladder Squamous Cell Carcinoma	3	3	25	43	0.07	0.07	0.58	1	0.12	0.52	no
Salivary Carcinoma, Other	3	3	16	43	0.07	0.07	0.37	1	0.19	0.19	no
Urethral Urothelial Carcinoma	5	7	38	71	0.07	0.1	0.54	0.71	0.13	0.46	no
Sarcomatoid Carcinoma of the Urinary Bladder	1	1	9	14	0.07	0.07	0.64	1	0.11	0.91	no
Uterine Dedifferentiated Carcinoma	2	4	6	28	0.07	0.14	0.21	0.5	0.33	0.25	no
Gastric Type Mucinous Carcinoma	3	3	28	41	0.07	0.07	0.68	1	0.11	0.52	no
Pleural Mesothelioma, Biphasic Type	7	16	21	95	0.07	0.17	0.22	0.44	0.33	0.1	no
Malignant Peripheral Nerve Sheath Tumor	11	18	40	147	0.07	0.12	0.27	0.61	0.28	0.0086	yes
Urethral Adenocarcinoma	1	1	9	18	0.06	0.06	0.5	1	0.11	1	no
Cervical Clear Cell Carcinoma	1	1	1	18	0.06	0.06	0.06	1	1	0.24	no
Cervical Neuroendocrine Tumor	1	2	1	18	0.06	0.11	0.06	0.5	1	0.4	no
Anaplastic Thyroid Cancer	11	15	117	195	0.06	0.08	0.6	0.73	0.09	0.56	no
Uterine Adenosarcoma	3	5	12	53	0.06	0.09	0.23	0.6	0.25	0.17	no
Desmoplastic Melanoma	2	3	18	35	0.06	0.09	0.51	0.67	0.11	0.91	no
Uterine Serous Carcinoma/Uterine Papillary Serous Carcinoma	43	45	658	740	0.06	0.06	0.89	0.96	0.07	0.55	no
Hepatocellular Carcinoma	30	40	189	513	0.06	0.08	0.37	0.75	0.16	2.8e-06	yes
Upper Tract Urothelial Carcinoma	30	45	198	506	0.06	0.09	0.39	0.67	0.15	0.00049	yes
Thymic Carcinoma	6	7	32	98	0.06	0.07	0.33	0.86	0.19	0.083	no
Oropharynx Squamous Cell Carcinoma	20	60	104	325	0.06	0.18	0.32	0.33	0.19	0.42	no
Rhabdomyosarcoma	6	7	20	97	0.06	0.07	0.21	0.86	0.3	0.0031	yes
Larynx Squamous Cell Carcinoma	7	8	82	112	0.06	0.07	0.73	0.88	0.09	0.85	no
Endometrial Carcinoma	30	43	219	475	0.06	0.09	0.46	0.7	0.14	0.00017	yes
Radiation-Associated Sarcoma	1	3	8	22	0.05	0.14	0.36	0.33	0.12	1	no
High-Grade B-Cell Lymphoma, with MYC and BCL2 and/or BCL6 Rearrangements	1	4	7	22	0.05	0.18	0.32	0.25	0.14	1	no
Cervical Serous Carcinoma	1	1	12	22	0.05	0.05	0.55	1	0.08
Head and Neck Squamous Cell Carcinoma	26	50	267	564	0.05	0.09	0.47	0.52	0.1	0.86	no
Mycosis Fungoides	5	8	18	107	0.05	0.07	0.17	0.62	0.28	0.019	yes
High-Grade Serous Fallopian Tube Cancer	6	6	115	128	0.05	0.05	0.9	1	0.05	0.82	no
Sarcomatoid Carcinoma of the Lung	4	5	47	85	0.05	0.06	0.55	0.8	0.09	0.5	no
Anaplastic Large Cell Lymphoma	2	2	9	41	0.05	0.05	0.22	1	0.22	0.19	no
Undifferentiated Malignant Neoplasm	8	13	36	164	0.05	0.08	0.22	0.62	0.22	0.0044	yes
Diffuse Type Stomach Adenocarcinoma	3	3	36	61	0.05	0.05	0.59	1	0.08	0.49	no
Anaplastic Oligodendroglioma	12	27	38	242	0.05	0.11	0.16	0.44	0.32	0.0013	yes
Uterine Clear Cell Carcinoma	6	9	63	120	0.05	0.07	0.52	0.67	0.1	0.61	no
Chondrosarcoma	7	11	32	139	0.05	0.08	0.23	0.64	0.22	0.01	yes
Gallbladder Cancer	13	18	163	257	0.05	0.07	0.63	0.72	0.08	0.43	no
Metaplastic Breast Cancer	4	5	47	78	0.05	0.06	0.6	0.8	0.09	0.52	no
Pancreatic Neuroendocrine Tumor	27	38	89	522	0.05	0.07	0.17	0.71	0.3	5.9e-14	yes
Prostate Adenocarcinoma	241	479	1445	4585	0.05	0.1	0.32	0.5	0.17	6e-20	yes
Serous Borderline Ovarian Tumor, Micropapillary	1	1	1	19	0.05	0.05	0.05	1	1	0.22	no
Small Cell Carcinoma of the Cervix	1	3	4	19	0.05	0.16	0.21	0.33	0.25	0.81	no
Intestinal Ampullary Carcinoma	1	1	11	19	0.05	0.05	0.58	1	0.09	0.97	no
Breast Invasive Carcinoma, NOS	23	29	199	428	0.05	0.07	0.46	0.79	0.12	0.0031	yes
Breast Neoplasm, NOS	3	4	13	55	0.05	0.07	0.24	0.75	0.23	0.024	yes
Clear Cell Ovarian Cancer	11	20	58	311	0.04	0.06	0.19	0.55	0.19	0.0015	yes
Oligoastrocytoma	1	1	18	28	0.04	0.04	0.64	1	0.06	0.85	no
Primary Mediastinal (Thymic) Large B-Cell Lymphoma	1	1	5	28	0.04	0.04	0.18	1	0.2	0.43	no
Miscellaneous Brain Tumor	1	2	3	28	0.04	0.07	0.11	0.5	0.33	0.43	no
Perihilar Cholangiocarcinoma	1	1	12	28	0.04	0.04	0.43	1	0.08	0.69	no
Diffuse Glioma	10	17	86	279	0.04	0.06	0.31	0.59	0.12	0.12	no
Pleural Mesothelioma	7	15	40	195	0.04	0.08	0.21	0.47	0.17	0.1	no
Astrocytoma	18	24	234	495	0.04	0.05	0.47	0.75	0.08	0.11	no
Uterine Endometrioid Carcinoma	72	181	378	1976	0.04	0.09	0.19	0.4	0.19	1e-11	yes
Adenosquamous Carcinoma of the Pancreas	3	3	64	82	0.04	0.04	0.78	1	0.05	0.73	no
Renal Angiomyolipoma	1	1	5	27	0.04	0.04	0.19	1	0.2	0.37	no
Anaplastic Astrocytoma	22	32	386	584	0.04	0.05	0.66	0.69	0.06	0.93	no
Sinonasal Squamous Cell Carcinoma	2	5	22	53	0.04	0.09	0.42	0.4	0.09	1	no
Burkitt Lymphoma	1	2	12	26	0.04	0.08	0.46	0.5	0.08	1	no
Lung Adenocarcinoma In Situ	1	1	2	26	0.04	0.04	0.08	1	0.5	0.75	no
Hurthle Cell Thyroid Cancer	3	4	16	78	0.04	0.05	0.21	0.75	0.19	0.13	no
High-Grade Neuroepithelial Tumor	2	2	7	52	0.04	0.04	0.13	1	0.29	0.21	no
Serous Ovarian Cancer	14	18	226	361	0.04	0.05	0.63	0.78	0.06	0.27	no
Breast Ductal Carcinoma In Situ	3	3	28	77	0.04	0.04	0.36	1	0.11	0.54	no
Pleural Mesothelioma, Epithelioid Type	14	32	65	356	0.04	0.09	0.18	0.44	0.22	0.0031	yes
Poorly Differentiated Carcinoma of the Stomach	5	6	63	123	0.04	0.05	0.51	0.83	0.08	0.32	no
Salivary Carcinoma	2	2	21	49	0.04	0.04	0.43	1	0.1	0.46	no
Esophageal Adenocarcinoma	49	55	948	1168	0.04	0.05	0.81	0.89	0.05	0.4	no
Melanoma of Unknown Primary	11	19	87	261	0.04	0.07	0.33	0.58	0.13	0.094	no
Squamous Cell Carcinoma of the Vulva/Vagina	5	10	64	118	0.04	0.08	0.54	0.5	0.08	0.95	no
Oral Cavity Squamous Cell Carcinoma	22	40	312	506	0.04	0.08	0.62	0.55	0.07	1	no
Adrenocortical Adenoma	1	1	3	23	0.04	0.04	0.13	1	0.33	0.16	no
Liposarcoma	4	7	10	91	0.04	0.08	0.11	0.57	0.4	0.088	no
Salivary Duct Carcinoma	7	8	99	158	0.04	0.05	0.63	0.88	0.07	0.22	no
Cholangiocarcinoma	25	48	194	560	0.04	0.09	0.35	0.52	0.13	0.14	no
Pancreatobiliary Ampullary Carcinoma	2	2	38	80	0.03	0.03	0.48	1	0.05	0.57	no
Signet Ring Cell Adenocarcinoma of the Colon and Rectum	2	5	40	78	0.03	0.06	0.51	0.4	0.05	0.65	no
Cutaneous Melanoma	45	89	374	1749	0.03	0.05	0.21	0.51	0.12	3.1e-08	yes
Extrahepatic Cholangiocarcinoma	5	5	96	194	0.03	0.03	0.49	1	0.05	0.1	no
Atypical Lung Carcinoid	3	10	8	116	0.03	0.09	0.07	0.3	0.38	0.17	no
Gastrointestinal Stromal Tumor	32	143	80	1236	0.03	0.12	0.06	0.22	0.4	4.9e-09	yes
Poorly Differentiated Thyroid Cancer	6	8	42	231	0.03	0.03	0.18	0.75	0.14	0.00069	yes
Peritoneal Serous Carcinoma	1	1	33	38	0.03	0.03	0.87	1	0.03	1	no
Signet Ring Cell Carcinoma of the Stomach	3	7	42	113	0.03	0.06	0.37	0.43	0.07	0.81	no
Pleural Mesothelioma, Sarcomatoid Type	1	5	8	37	0.03	0.14	0.22	0.2	0.12	0.95	no
Embryonal Tumor	1	2	4	36	0.03	0.06	0.11	0.5	0.25	0.63	no
Angiosarcoma	5	6	49	179	0.03	0.03	0.27	0.83	0.1	0.034	yes
Pleomorphic Carcinoma of the Lung	2	4	46	71	0.03	0.06	0.65	0.5	0.04	1	no
Duodenal Adenocarcinoma	4	6	70	139	0.03	0.04	0.5	0.67	0.06	0.49	no
Anaplastic Ependymoma	3	5	9	104	0.03	0.05	0.09	0.6	0.33	0.11	no
Esophagogastric Adenocarcinoma	11	13	285	376	0.03	0.03	0.76	0.85	0.04	0.52	no
Signet Ring Cell Type of the Appendix	1	1	12	34	0.03	0.03	0.35	1	0.08	0.64	no
Alveolar Soft Part Sarcoma	1	1	3	34	0.03	0.03	0.09	1	0.33	0.27	no
Mantle Cell Lymphoma	10	23	103	331	0.03	0.07	0.31	0.43	0.1	0.26	no
Primitive Neuroectodermal Tumor	1	1	4	33	0.03	0.03	0.12	1	0.25	0.34	no
T-Cell Prolymphocytic Leukemia	1	2	4	33	0.03	0.06	0.12	0.5	0.25	0.48	no
Pancreatic Adenocarcinoma	139	160	3156	4474	0.03	0.04	0.71	0.87	0.04	3e-05	yes
Diffuse Large B-Cell Lymphoma, NOS	23	48	208	740	0.03	0.06	0.28	0.48	0.11	0.0077	yes
Melanoma	70	136	506	2228	0.03	0.06	0.23	0.51	0.14	1e-08	yes
Small Bowel Cancer	5	8	81	156	0.03	0.05	0.52	0.62	0.06	0.68	no
Chronic Lymphocytic Leukemia/Small Lymphocytic Lymphoma	35	106	199	1089	0.03	0.1	0.18	0.33	0.18	0.00079	yes
Gastrointestinal Neuroendocrine Tumors	7	29	28	216	0.03	0.13	0.13	0.24	0.25	0.031	yes
Lung Adenosquamous Carcinoma	4	9	63	118	0.03	0.08	0.53	0.44	0.06	0.97	no
Gallbladder Adenocarcinoma, NOS	5	7	89	144	0.03	0.05	0.62	0.71	0.06	0.54	no
Colorectal Adenocarcinoma	37	48	1603	2443	0.02	0.02	0.66	0.77	0.02	0.57	no
Small Bowel Well-Differentiated Neuroendocrine Tumor	3	12	8	197	0.02	0.06	0.04	0.25	0.38	0.027	yes
Adenocarcinoma of the Gastroesophageal Junction	8	12	374	520	0.02	0.02	0.72	0.67	0.02	0.93	no
Mucinous Adenocarcinoma of the Colon and Rectum	5	16	139	320	0.02	0.05	0.43	0.31	0.04	0.93	no
Cervical Adenocarcinoma	1	3	12	64	0.02	0.05	0.19	0.33	0.08	0.63	no
Peritoneal Mesothelioma	2	5	14	124	0.02	0.04	0.11	0.4	0.14	0.34	no
MDS with excess blasts-1	2	2	22	122	0.02	0.02	0.18	1	0.09	0.12	no
Therapy-Related Myeloid Neoplasms	1	1	17	60	0.02	0.02	0.28	1	0.06	0.53	no
Peripheral T-Cell lymphoma, NOS	3	4	35	176	0.02	0.02	0.2	0.75	0.09	0.089	no
Epithelioid Sarcoma	1	1	4	57	0.02	0.02	0.07	1	0.25	0.15	no
Head and Neck Carcinoma, Other	1	2	20	57	0.02	0.04	0.35	0.5	0.05	0.96	no
Renal Cell Carcinoma	8	18	48	423	0.02	0.04	0.11	0.44	0.17	0.0033	yes
Lymphoid Neoplasm	1	2	6	52	0.02	0.04	0.12	0.5	0.17	0.46	no
Thymoma	2	3	6	103	0.02	0.03	0.06	0.67	0.33	0.059	no
Intestinal Type Stomach Adenocarcinoma	1	1	34	50	0.02	0.02	0.68	1	0.03	0.91	no
Follicular Thyroid Cancer	2	6	6	99	0.02	0.06	0.06	0.33	0.33	0.27	no
Rectal Adenocarcinoma	44	55	1604	2114	0.02	0.03	0.76	0.8	0.03	0.53	no
Yolk Sac Tumor	2	2	24	96	0.02	0.02	0.25	1	0.08	0.19	no
Undifferentiated Carcinoma of the Pancreas	1	1	35	46	0.02	0.02	0.76	1	0.03	1	no
Acinic Cell Carcinoma	1	1	6	44	0.02	0.02	0.14	1	0.17	0.39	no
Cervical Adenosquamous Carcinoma	1	6	3	43	0.02	0.14	0.07	0.17	0.33	0.53	no
Extramammary Paget Disease	2	4	24	84	0.02	0.05	0.29	0.5	0.08	0.59	no
Stomach Adenocarcinoma	22	32	518	917	0.02	0.03	0.56	0.69	0.04	0.25	no
Colon Adenocarcinoma	176	259	5096	7153	0.02	0.04	0.71	0.68	0.03	0.93	no
Acinar Cell Carcinoma of the Pancreas	2	14	10	81	0.02	0.17	0.12	0.14	0.2	0.87	no
Diffuse Astrocytoma	1	2	117	177	0.01	0.01	0.66	0.5	0.01	1	no
Papillary Renal Cell Carcinoma	1	7	6	174	0.01	0.04	0.03	0.14	0.17	0.42	no
Low-Grade Glioma, NOS	2	6	31	336	0.01	0.02	0.09	0.33	0.06	0.14	no
Lung Carcinoid	1	6	4	166	0.01	0.04	0.02	0.17	0.25	0.37	no
Seminoma	1	7	7	162	0.01	0.04	0.04	0.14	0.14	0.52	no
Endocervical Adenocarcinoma	1	2	27	155	0.01	0.01	0.17	0.5	0.04	0.52	no
Wilms' Tumor	1	2	29	148	0.01	0.01	0.2	0.5	0.03	0.59	no
Renal Clear Cell Carcinoma	7	21	108	993	0.01	0.02	0.11	0.33	0.06	0.018	yes
Ewing Sarcoma	2	4	35	269	0.01	0.01	0.13	0.5	0.06	0.26	no
Granulosa Cell Tumor	1	5	8	129	0.01	0.04	0.06	0.2	0.12	0.27	no
Mucinous Ovarian Cancer	1	2	82	124	0.01	0.02	0.66	0.5	0.01	1	no
Mucinous Adenocarcinoma of the Appendix	2	6	60	242	0.01	0.02	0.25	0.33	0.03	0.69	no
Plasma Cell Myeloma	4	23	50	483	0.01	0.05	0.1	0.17	0.08	0.39	no
Retinoblastoma	1	79	2	119	0.01	0.66	0.02	0.01	0.5	1	no
Pituitary Adenoma	2	11	12	236	0.01	0.05	0.05	0.18	0.17	0.22	no
Medullary Thyroid Cancer	2	7	11	225	0.01	0.03	0.05	0.29	0.18	0.17	no
Glioma, NOS	1	1	15	111	0.01	0.01	0.14	1	0.07	0.38	no
Intrahepatic Cholangiocarcinoma	7	31	165	759	0.01	0.04	0.22	0.23	0.04	0.7	no
Well-Differentiated Liposarcoma	1	1	4	104	0.01	0.01	0.04	1	0.25	0.14	no
Embryonal Rhabdomyosarcoma	1	2	20	103	0.01	0.02	0.19	0.5	0.05	0.67	no
Dedifferentiated Liposarcoma	3	19	13	308	0.01	0.06	0.04	0.16	0.23	0.14	no
Marginal Zone Lymphoma	1	3	11	99	0.01	0.03	0.11	0.33	0.09	0.55	no
Low-Grade Serous Ovarian Cancer	3	11	15	294	0.01	0.04	0.05	0.27	0.2	0.0031	yes
Mucosal Melanoma of the Vulva/Vagina	1	2	29	97	0.01	0.02	0.3	0.5	0.03	0.77	no
Nasopharyngeal Carcinoma	1	3	17	92	0.01	0.03	0.18	0.33	0.06	0.64	no
Synovial Sarcoma	2	8	5	180	0.01	0.04	0.03	0.25	0.4	0.089	no
Schwannoma	1	1	3	88	0.01	0.01	0.03	1	0.33	0.12	no
Hepatocellular Carcinoma plus Intrahepatic Cholangiocarcinoma	1	8	20	88	0.01	0.09	0.23	0.12	0.05	1	no
Medulloblastoma	3	11	36	261	0.01	0.04	0.14	0.27	0.08	0.61	no
Mature B-Cell Neoplasms	3	10	36	254	0.01	0.04	0.14	0.3	0.08	0.35	no
Chordoma	1	2	7	80	0.01	0.03	0.09	0.5	0.14	0.43	no
Unclassified Renal Cell Carcinoma	2	5	21	149	0.01	0.03	0.14	0.4	0.1	0.25	no
Cervical Squamous Cell Carcinoma	4	28	25	297	0.01	0.09	0.08	0.14	0.16	0.45	no
B-Lymphoblastic Leukemia/Lymphoma	7	23	75	509	0.01	0.05	0.15	0.3	0.09	0.11	no
Goblet Cell Adenocarcinoma of the Appendix	1	5	10	69	0.01	0.07	0.14	0.2	0.1	0.6	no
Ganglioglioma	2	2	2	137	0.01	0.01	0.01	1	1	0.0068	yes
Atypical Teratoid/Rhabdoid Tumor	0	1	0	46	0	0.02	0	0
Neuroblastoma	0	7	11	531	0	0.01	0.02	0	0	1	no
B-Lymphoblastic Leukemia/Lymphoma, NOS	0	3	7	107	0	0.03	0.07	0	0	1	no
Meningioma	0	7	10	341	0	0.02	0.03	0	0	1	no
UNKNOWN	0	3	34	231	0	0.01	0.15	0	0	1	no
Pineoblastoma	0	3	1	32	0	0.09	0.03	0	0	1	no
Dysembryoplastic Neuroepithelial Tumor	0	1	1	45	0	0.02	0.02	0	0	1	no
Transient Abnormal Myelopoiesis	0	0	0	1	0	0	0
Ependymoma	0	6	6	151	0	0.04	0.04	0	0	1	no
Choroid Plexus Papilloma	0	0	1	22	0	0	0.05		0
Hepatoblastoma	0	0	1	49	0	0	0.02		0
Monomorphic PTLD (B- and T-/NK-cell types)	0	0	0	2	0	0	0
Myeloid Leukemia Associated with Down Syndrome	0	0	0	6	0	0	0
Pleuropulmonary Blastoma	0	0	1	9	0	0	0.11		0
Acute Myelomonocytic Leukemia	0	0	0	11	0	0	0
Acute Monoblastic/Monocytic Leukemia	0	0	2	19	0	0	0.11		0
Chronic Myelogenous Leukemia	0	0	0	124	0	0	0
T-Lymphoblastic Leukemia/Lymphoma	0	3	9	138	0	0.02	0.07	0	0	1	no
Craniopharyngioma, Adamantinomatous Type	0	0	2	34	0	0	0.06		0
Inflammatory Myofibroblastic Tumor	0	2	2	40	0	0.05	0.05	0	0	1	no
Hodgkin Lymphoma	0	0	2	21	0	0	0.1		0
Nodular Sclerosis Classical Hodgkin Lymphoma	0	0	0	7	0	0	0
Choroid Plexus Carcinoma	0	0	7	13	0	0	0.54		0
Neurofibroma	0	0	2	60	0	0	0.03		0
Lymphoid Benign	0	0	2	3	0	0	0.67		0
Posttransplant Lymphoproliferative Disorders	0	0	0	2	0	0	0
Langerhans Cell Histiocytosis	0	1	0	148	0	0.01	0	0
Mixed Germ Cell Tumor	0	9	42	369	0	0.02	0.11	0	0	1	no
Atypical Nevus	0	2	5	111	0	0.02	0.05	0	0	1	no
Histiocytic and Dendritic Cell Neoplasms	0	1	1	59	0	0.02	0.02	0	0	1	no
Medulloepithelioma	0	0	1	4	0	0	0.25		0
Diffuse Intrinsic Pontine Glioma	0	0	36	95	0	0	0.38		0
Rosai-Dorfman Disease	0	0	0	52	0	0	0
Mixed Phenotype Acute Leukemia, B/Myeloid, NOS	0	0	1	36	0	0	0.03		0
Undifferentiated Embryonal Sarcoma of the Liver	0	0	6	6	0	0	1		0
Burkitt-Like Lymphoma with 11q Aberration	0	0	0	1	0	0	0
Round Cell Sarcoma, NOS	0	3	6	53	0	0.06	0.11	0	0	1	no
Infantile Fibrosarcoma	0	0	0	3	0	0	0
Solid Pseudopapillary Neoplasm of the Pancreas	0	0	1	24	0	0	0.04		0
Acute Megakaryoblastic Leukemia	0	0	0	4	0	0	0
B-Lymphoblastic Leukemia/Lymphoma with iAMP21	0	0	0	2	0	0	0
Teratoma	0	2	6	30	0	0.07	0.2	0	0	1	no
AML, NOS	0	0	7	92	0	0	0.08		0
Ganglioneuroblastoma	0	0	0	35	0	0	0
Sinonasal Adenocarcinoma	0	0	4	15	0	0	0.27		0
Therapy-Related Acute Myeloid Leukemia	0	0	32	129	0	0	0.25		0
Sertoli-Leydig Cell Tumor	0	0	0	31	0	0	0
Immature Teratoma	0	0	2	37	0	0	0.05		0
B-Lymphoblastic Leukemia/Lymphoma with Hyperdiploidy	0	0	0	5	0	0	0
Disseminated Juvenile Xanthogranuloma	0	0	0	6	0	0	0
Angiomatoid Fibrous Histiocytoma	0	0	0	9	0	0	0
Dysgerminoma	0	1	0	12	0	0.08	0	0
Desmoid/Aggressive Fibromatosis	0	0	3	120	0	0	0.03		0
Hemangioblastoma	0	0	0	31	0	0	0
Alveolar Rhabdomyosarcoma	0	1	2	63	0	0.02	0.03	0	0	1	no
Uveal Melanoma	0	2	7	261	0	0.01	0.03	0	0	1	no
Breast Angiosarcoma	0	0	5	44	0	0	0.11		0
Fibrosarcoma	0	0	2	24	0	0	0.08		0
Subependymoma	0	0	0	13	0	0	0
Renal Neuroendocrine Tumor	0	1	0	3	0	0.33	0	0
Breast Sarcoma	0	0	3	8	0	0	0.38		0
Head and Neck Mucosal Melanoma	0	5	13	99	0	0.05	0.13	0	0	1	no
Smooth Muscle Neoplasm, NOS	0	0	0	9	0	0	0
Dedifferentiated Chordoma	0	0	1	1	0	0	1		0
Myxoid Chondrosarcoma	0	1	1	10	0	0.1	0.1	0	0	1	no
Endometrial Stromal Sarcoma	0	0	2	33	0	0	0.06		0
Primary Cutaneous CD8 Positive Aggressive Epidermotropic Cytotoxic T-Cell Lymphoma	0	0	0	3	0	0	0
Anorectal Mucosal Melanoma	0	3	16	124	0	0.02	0.13	0	0	1	no
Acute Leukemias of Ambiguous Lineage	0	0	1	9	0	0	0.11		0
Non-Hodgkin Lymphoma	0	2	9	48	0	0.04	0.19	0	0	1	no
Rhabdoid Meningioma	0	0	0	6	0	0	0
Anaplastic Meningioma	0	2	0	44	0	0.05	0	0
Angioimmunoblastic T-Cell Lymphoma	0	0	4	147	0	0	0.03		0
Myelodysplastic/Myeloproliferative Neoplasms	0	0	1	47	0	0	0.02		0
Acral Melanoma	0	1	5	173	0	0.01	0.03	0	0	1	no
Clear Cell Sarcoma	0	0	2	45	0	0	0.04		0
Pilocytic Astrocytoma	0	1	8	272	0	0	0.03	0	0	1	no
Proliferating Pilar Cystic Tumor	0	0	1	2	0	0	0.5		0
Intimal Sarcoma	0	0	4	31	0	0	0.13		0
Conjunctival Melanoma	0	0	5	13	0	0	0.38		0
Ocular Melanoma	0	0	3	51	0	0	0.06		0
Oncocytic Adenoma of the Thyroid	0	0	1	2	0	0	0.5		0
Hepatocellular Adenoma	0	0	0	4	0	0	0
Aggressive Digital Papillary Adenocarcinoma	0	0	1	5	0	0	0.2		0
Adult T-Cell Leukemia/Lymphoma	0	1	3	31	0	0.03	0.1	0	0	1	no
Myeloid Atypical	0	1	0	8	0	0.12	0	0
Atypical Lipomatous Tumor	0	0	1	6	0	0	0.17		0
Spindle Cell Rhabdomyosarcoma	0	0	5	18	0	0	0.28		0
Hemangiopericytoma of the Central Nervous System	0	0	1	15	0	0	0.07		0
Adenoid Cystic Carcinoma of the Lung	0	0	0	20	0	0	0
High-Grade Endometrial Stromal Sarcoma	0	0	3	19	0	0	0.16		0
Myxoid/Round-Cell Liposarcoma	0	1	5	93	0	0.01	0.05	0	0	1	no
B-Cell Lymphoma, Unclassifiable, with Features Intermediate between DLBCL and Classical Hodgkin lymphoma	0	0	0	1	0	0	0
Mucoepidermoid Carcinoma	0	1	12	64	0	0.02	0.19	0	0	1	no
Pheochromocytoma	0	1	6	43	0	0.02	0.14	0	0	1	no
Clear Cell Sarcoma of Kidney	0	0	0	3	0	0	0
Small Intestinal Carcinoma	0	0	32	68	0	0	0.47		0
Renal Medullary Carcinoma	0	0	7	52	0	0	0.13		0
T-Cell Large Granular Lymphocytic Leukemia	0	0	2	58	0	0	0.03		0
Signet Ring Mucinous Carcinoma	0	0	0	3	0	0	0
Conventional Type Chordoma	0	1	0	9	0	0.11	0	0
Blastic Plasmacytoid Dendritic Cell Neoplasm	0	3	0	29	0	0.1	0	0
Inflammatory Myofibroblastic Lung Tumor	0	0	0	4	0	0	0
Renal Oncocytoma	0	1	1	42	0	0.02	0.02	0	0	1	no
Uterine Leiomyoma	0	0	1	8	0	0	0.12		0
Serous Borderline Ovarian Tumor	0	1	2	48	0	0.02	0.04	0	0	1	no
Atypical Meningioma	0	3	4	99	0	0.03	0.04	0	0	1	no
Choriocarcinoma	0	0	8	42	0	0	0.19		0
Cervical Endometrioid Carcinoma	0	0	7	18	0	0	0.39		0
Desmoplastic/Nodular Medulloblastoma	0	0	1	22	0	0	0.05		0
Paraganglioma	0	1	3	47	0	0.02	0.06	0	0	1	no
Uterine Myxoid Leiomyosarcoma	0	0	3	14	0	0	0.21		0
Intraductal Papillary Mucinous Neoplasm	0	1	4	26	0	0.04	0.15	0	0	1	no
Chronic Myelomonocytic Leukemia	0	0	5	125	0	0	0.04		0
Central Neurocytoma	0	0	1	12	0	0	0.08		0
Waldenstrom Macroglobulinemia	0	0	1	20	0	0	0.05		0
Hemangioma	0	1	0	157	0	0.01	0	0
Proximal-Type Epithelioid Sarcoma	0	0	0	8	0	0	0
Primary Brain Tumor	0	2	4	38	0	0.05	0.11	0	0	1	no
Papillary Stomach Adenocarcinoma	0	0	3	3	0	0	1		0
Myoepithelial Carcinoma	0	0	2	29	0	0	0.07		0
Malignant Lymphoma	0	3	5	32	0	0.09	0.16	0	0	1	no
Myxopapillary Ependymoma	0	0	0	17	0	0	0
Spindle Cell Oncocytoma of the Adenohypophysis	0	0	0	2	0	0	0
Hairy Cell Leukemia	0	1	1	64	0	0.02	0.02	0	0	1	no
Astroblastoma	0	1	1	7	0	0.14	0.14	0	0	1	no
Mature Teratoma	0	0	6	33	0	0	0.18		0
Primary Myelofibrosis	0	1	1	138	0	0.01	0.01	0	0	1	no
Histiocytic Dendritic Cell Sarcoma	0	1	1	21	0	0.05	0.05	0	0	1	no
Adenoid Cystic Breast Cancer	0	0	1	18	0	0	0.06		0
Myxoma	0	0	0	12	0	0	0
Translocation-Associated Renal Cell Carcinoma	0	1	1	41	0	0.02	0.02	0	0	1	no
Pleomorphic Xanthoastrocytoma	0	1	3	33	0	0.03	0.09	0	0	1	no
Mature T and NK Neoplasms	0	2	7	53	0	0.04	0.13	0	0	1	no
Dermatofibrosarcoma Protuberans	0	0	1	24	0	0	0.04		0
Sex Cord Stromal Tumor	0	0	0	40	0	0	0
Penile Squamous Cell Carcinoma	0	0	21	44	0	0	0.48		0
Polycythemia Vera	0	1	6	114	0	0.01	0.05	0	0	1	no
Thymic Neuroendocrine Tumor	0	0	0	15	0	0	0
Low-Grade Fibromyxoid Sarcoma	0	0	0	16	0	0	0
Mucinous Carcinoma	0	0	1	18	0	0	0.06		0
Miscellaneous Neuroepithelial Tumor	0	1	1	32	0	0.03	0.03	0	0	1	no
Collecting Duct Renal Cell Carcinoma	0	1	5	21	0	0.05	0.24	0	0	1	no
Olfactory Neuroblastoma	0	0	3	24	0	0	0.12		0
Testicular Lymphoma	0	0	0	2	0	0	0
Germinoma	0	3	0	12	0	0.25	0	0
Non-Seminomatous Germ Cell Tumor	0	3	13	77	0	0.04	0.17	0	0	1	no
Pancreatoblastoma	0	0	0	7	0	0	0
Low-Grade Endometrial Stromal Sarcoma	0	0	2	29	0	0	0.07		0
Atypical Pituitary Adenoma	0	0	3	7	0	0	0.43		0
Essential Thrombocythemia	0	1	1	92	0	0.01	0.01	0	0	1	no
Endocrine Mucin Producing Sweat Gland Carcinoma	0	0	0	2	0	0	0
Mucinous Borderline Ovarian Tumor	0	0	10	21	0	0	0.48		0
Epithelial-Myoepithelial Carcinoma	0	0	2	10	0	0	0.2		0
Epithelioid Hemangioendothelioma	0	1	1	53	0	0.02	0.02	0	0	1	no
NUT Midline Carcinoma of the Head and Neck	0	0	0	19	0	0	0
Pituicytoma	0	0	0	4	0	0	0
Tenosynovial Giant Cell Tumor Diffuse Type	0	0	1	5	0	0	0.2		0
Ovarian Seromucinous Borderline Tumor	0	0	0	3	0	0	0
Embryonal Carcinoma	0	2	0	49	0	0.04	0	0
Giant Cell Carcinoma of the Lung	0	0	3	5	0	0	0.6		0
Fibrolamellar Carcinoma	0	0	1	50	0	0	0.02		0
Pilomyxoid Astrocytoma	0	0	0	18	0	0	0
Extraskeletal Myxoid Chondrosarcoma	0	0	3	15	0	0	0.2		0
Melanotic Schwannoma	0	0	1	8	0	0	0.12		0
Desmoplastic Small-Round-Cell Tumor	0	0	5	113	0	0	0.04		0
Pineal Parenchymal Tumor of Intermediate Differentiation	0	1	0	12	0	0.08	0	0
Hyalinizing Trabecular Adenoma of the Thyroid	0	0	0	1	0	0	0
Epithelioid Trophoblastic Tumor	0	0	0	8	0	0	0
Follicular Dendritic Cell Sarcoma	0	2	0	21	0	0.1	0	0
Colonic Type Adenocarcinoma of the Appendix	0	0	1	9	0	0	0.11		0
Prostate Squamous Cell Carcinoma	0	0	1	2	0	0	0.5		0
Mesonephric Carcinoma	0	0	0	8	0	0	0
Solitary Fibrous Tumor of the Central Nervous System	0	0	0	13	0	0	0
Tubular Stomach Adenocarcinoma	0	0	17	26	0	0	0.65		0
Germ Cell Tumor, Brain	0	1	3	10	0	0.1	0.3	0	0	1	no
Rhabdoid Cancer	0	1	0	11	0	0.09	0	0
Adenosquamous Carcinoma of the Stomach	0	0	2	2	0	0	1		0
Carcinoma with Chondroid Metaplasia	0	0	2	2	0	0	1		0
Anaplastic Ganglioglioma	0	0	2	13	0	0	0.15		0
Paget Disease of the Nipple	0	0	2	4	0	0	0.5		0
Primary Effusion Lymphoma	0	0	0	1	0	0	0
Sezary Syndrome	0	0	2	16	0	0	0.12		0
Malignant Tumor	0	0	16	46	0	0	0.35		0
Ovarian Seromucinous Carcinoma	0	0	3	8	0	0	0.38		0
Low-Grade Neuroepithelial Tumor	0	0	1	19	0	0	0.05		0
Ependymomal Tumor	0	0	0	5	0	0	0
Gangliocytoma	0	0	0	4	0	0	0
Congenital Nevus	0	1	0	7	0	0.14	0	0
Pineal Tumor	0	1	0	8	0	0.12	0	0
Granular Cell Tumor	0	0	0	9	0	0	0
Mixed Cancer Types	0	0	4	13	0	0	0.31		0
Craniopharyngioma, Papillary Type	0	0	0	7	0	0	0
Adenomyoepithelioma of the Breast	0	0	0	6	0	0	0
Thymic Epithelial Tumor	0	0	2	4	0	0	0.5		0
Mucosal Melanoma of the Urethra	0	2	5	15	0	0.13	0.33	0	0	1	no
Erdheim-Chester Disease	0	0	0	92	0	0	0
Mucinous Stomach Adenocarcinoma	0	0	7	13	0	0	0.54		0
Porocarcinoma/Spiroadenocarcinoma	0	1	2	9	0	0.11	0.22	0	0	1	no
Urethral Squamous Cell Carcinoma	0	0	4	12	0	0	0.33		0
Pulmonary Lymphangiomyomatosis	0	0	0	1	0	0	0
Extranodal Marginal Zone Lymphoma of Mucosa-Associated Lymphoid Tissue (MALT lymphoma)	0	1	2	52	0	0.02	0.04	0	0	1	no
Sellar Tumor	0	0	0	7	0	0	0
Salivary Adenocarcinoma	0	1	15	41	0	0.02	0.37	0	0	1	no
Complete Hydatidiform Mole	0	0	0	1	0	0	0
Urachal Adenocarcinoma	0	0	15	18	0	0	0.83		0
Gestational Trophoblastic Disease	0	1	2	9	0	0.11	0.22	0	0	1	no
Clear Cell Papillary Renal Cell Carcinoma	0	0	0	14	0	0	0
Well-Differentiated Neuroendocrine Tumor of the Rectum	0	1	1	35	0	0.03	0.03	0	0	1	no
Germ Cell Tumor with Somatic-Type Malignancy	0	0	6	25	0	0	0.24		0
Nodular Lymphocyte-Predominant Hodgkin Lymphoma	0	0	1	16	0	0	0.06		0
Primary DLBCL of the central nervous system	0	1	2	10	0	0.1	0.2	0	0	1	no
Sclerosing Epithelioid Fibrosarcoma	0	1	0	20	0	0.05	0	0
Renal Clear Cell Carcinoma with Sarcomatoid Features	0	0	5	19	0	0	0.26		0
Well-Differentiated Neuroendocrine Tumor of the Appendix	0	0	0	20	0	0	0
Liver Angiosarcoma	0	0	3	5	0	0	0.6		0
Testicular Mesothelioma	0	2	0	8	0	0.25	0	0
Classical Hodgkin Lymphoma	0	0	7	56	0	0	0.12		0
Splenic Marginal Zone Lymphoma	0	0	2	17	0	0	0.12		0
Choroid Plexus Tumor	0	0	1	8	0	0	0.12		0
Metaplastic Squamous Cell Carcinoma	0	0	4	6	0	0	0.67		0
Cervical Rhabdomyosarcoma	0	0	0	2	0	0	0
Mesenchymal Chondrosarcoma	0	0	1	14	0	0	0.07		0
Poorly Differentiated Carcinoma of the Uterus	0	1	6	14	0	0.07	0.43	0	0	1	no
Myofibroma	0	0	1	10	0	0	0.1		0
Chondroblastoma	0	0	0	2	0	0	0
Atypical Choroid Plexus Papilloma	0	0	2	14	0	0	0.14		0
Mucinous Cystic Neoplasm	0	0	4	7	0	0	0.57		0
Cervical Adenoid Cystic Carcinoma	0	0	0	2	0	0	0
Encapsulated Glioma	0	0	2	31	0	0	0.06		0
Well-Differentiated Thyroid Cancer	0	1	1	16	0	0.06	0.06	0	0	1	no
Metaplastic Carcinosarcoma	0	0	1	1	0	0	1		0
Uterine Mucinous Carcinoma	0	0	4	4	0	0	1		0
Nodal Marginal Zone Lymphoma	0	0	0	2	0	0	0
Mixed Ampullary Carcinoma	0	0	3	8	0	0	0.38		0
Mucinous Adenocarcinoma of the Vulva/Vagina	0	0	1	1	0	0	1		0
Peritoneum	0	0	4	7	0	0	0.57		0
Ovary/Fallopian Tube	0	0	2	6	0	0	0.33		0
Vaginal Adenocarcinoma	0	0	10	16	0	0	0.62		0
Prostate	0	0	3	4	0	0	0.75		0
Head and Neck	0	0	2	6	0	0	0.33		0
Testis	0	0	1	6	0	0	0.17		0
Steroid Cell Tumor, NOS	0	1	1	5	0	0.2	0.2	0	0	1	no
Odontogenic Carcinoma	0	0	0	2	0	0	0
Skin	0	1	0	4	0	0.25	0	0
CNS/Brain	0	0	0	4	0	0	0
Dermatofibroma	0	0	0	3	0	0	0
Pancreas	0	0	3	4	0	0	0.75		0
Bowel	0	0	2	3	0	0	0.67		0
Ovarian Germ Cell Tumor	0	0	1	8	0	0	0.12		0
Thyroid	0	0	0	5	0	0	0
Esophagus/Stomach	0	0	0	2	0	0	0
Colon Adenocarcinoma In Situ	0	0	4	11	0	0	0.36		0
Clear Cell Carcinoma of the Lung	0	0	1	1	0	0	1		0
Systemic Mastocytosis	0	0	1	29	0	0	0.03		0
Other	0	2	51	307	0	0.01	0.17	0	0
Endometrioid Borderlin Ovarian Tumor	0	0	0	1	0	0	0
Adenocarcinoma In Situ	0	0	1	4	0	0	0.25		0
Primary Neuroepithelial Tumor	0	0	0	10	0	0	0
Papillary Tumor of the Pineal Region	0	0	0	5	0	0	0
Rosette-forming Glioneuronal Tumor of the Fourth Ventricle	0	0	1	30	0	0	0.03		0
Papillary Glioneuronal Tumor	0	0	0	4	0	0	0
Lentigo Maligna Melanoma	0	0	2	25	0	0	0.08		0
Desmoplastic Infantile Ganglioglioma	0	0	0	9	0	0	0
Cellular Schwannoma	0	0	0	8	0	0	0
Brenner Tumor	0	0	2	3	0	0	0.67		0
Clear Cell Odontogenic Carcinoma	0	0	0	3	0	0	0
Ossifying Fibromyxoid Tumor	0	1	0	4	0	0.25	0	0
Small Cell Osteosarcoma	0	0	0	2	0	0	0
Renal Mucinous Tubular Spindle Cell Carcinoma	0	0	0	7	0	0	0
Sweat Gland Adenocarcinoma	0	0	2	5	0	0	0.4		0
Primary CNS Melanoma	0	0	0	3	0	0	0
Therapy-Related Myelodysplastic Syndrome	0	0	35	88	0	0	0.4		0
Lymphoepithelioma-like Carcinoma of the Lung	0	0	1	3	0	0	0.33		0
FH-Deficient Renal Cell Carcinoma	0	0	1	15	0	0	0.07		0
Extraventricular Neurocytoma	0	0	0	3	0	0	0
Ovarian Seromucinous Adenoma	0	0	0	1	0	0	0
Mixed Cervical Carcinoma	0	0	2	7	0	0	0.29		0
Secondary Osteosarcoma	0	1	0	3	0	0.33	0	0
Intestinal Type Mucinous Carcinoma	0	0	2	4	0	0	0.5		0
Mucosal Melanoma of the Esophagus	0	0	0	4	0	0	0
Primary Myelofibrosis,Overt Fibrotic Stage	0	0	2	14	0	0	0.14		0
Basaloid Penile Squamous Cell Carcinoma	0	0	1	4	0	0	0.25		0
MDS with excess blasts-2	0	0	28	192	0	0	0.15		0
MDS/MPN, Unclassifiable	0	0	3	20	0	0	0.15		0
AML with Myelodysplasia-Related Changes	0	1	86	405	0	0	0.21	0	0	1	no
Anaplastic Pleomorphic Xanthoastrocytoma	0	0	4	29	0	0	0.14		0
Polycythaemia Vera Myelofibrosis	0	0	2	14	0	0	0.14		0
AML with t(9;11)(p21.3;q23.3);MLLT3-KMT2A	0	0	0	7	0	0	0
Extra Gonadal Germ Cell Tumor	0	0	10	17	0	0	0.59		0
Anal Gland Adenocarcinoma	0	0	4	8	0	0	0.5		0
Glomangiosarcoma	0	0	0	3	0	0	0
MDS with Excess Blasts	0	0	5	26	0	0	0.19		0
EBV Positive DLBCL, NOS	0	0	0	10	0	0	0
Serous Cystadenoma of the Pancreas	0	0	0	2	0	0	0
AML with inv(16)(p13.1q22) or t(16;16)(p13.1;q22);CBFB-MYH11	0	0	0	25	0	0	0
MDS/MPN with Ring Sideroblasts and Thrombocytosis	0	0	0	13	0	0	0
Myeloid Neoplasms with Germ Line Predisposition	0	0	0	6	0	0	0
Myeloproliferative Neoplasms, Unclassifiable	0	0	0	3	0	0	0
Systemic Mastocytosis with an Associated Hematological Neoplasm	0	0	0	35	0	0	0
Chronic Myelomonocytic Leukemia-1	0	0	1	36	0	0	0.03		0
Chronic Myeloid Leukemia, BCR-ABL1+	0	0	0	72	0	0	0
Ciliated Muconodular Papillary Tumor of the Lung	0	0	0	4	0	0	0
Telangiectatic Osteosarcoma	0	0	1	2	0	0	0.5		0
Parosteal Osteosarcoma	0	0	0	3	0	0	0
MDS with Ring Sideroblasts and Single Lineage Dysplasia	0	0	0	12	0	0	0
Fibrothecoma	0	0	0	2	0	0	0
Essential Thrombocythemia Myelofibrosis	0	1	0	31	0	0.03	0	0
Mastocytosis	0	0	0	3	0	0	0
Lymphoid Atypical	0	0	2	63	0	0	0.03		0
Low-Grade Central Osteosarcoma	0	0	0	1	0	0	0
AML with inv(3)(q21.3q26.2) or t(3;3)(q21.3;q26.2); GATA2, MECOM	0	0	0	10	0	0	0
MDS with Ring Sideroblasts and Multilineage Dysplasia	0	0	6	28	0	0	0.21		0
Uterine Mesonephric Carcinoma	0	0	0	10	0	0	0
MDS with Isolated Del(5q)	0	0	0	14	0	0	0
Spiroma/Spiradenoma	0	0	0	3	0	0	0
Mixed Phenotype Acute Leukemia with t(9;22)(q34.1;q11.2); BCR-ABL1	0	0	0	13	0	0	0
Fibroblastic Osteosarcoma	0	0	1	2	0	0	0.5		0
Glassy Cell Carcinoma of the Cervix	0	0	0	2	0	0	0
Uterine Smooth Muscle Tumor	0	1	0	4	0	0.25	0	0
MDS with Multilineage Dysplasia	0	0	4	49	0	0	0.08		0
AML with Mutated NPM1	0	0	2	117	0	0	0.02		0
Chronic Myelomonocytic Leukemia-0	0	0	0	23	0	0	0
Histiocytic Sarcoma	0	0	2	14	0	0	0.14		0
B-Lymphoblastic Leukemia/Lymphoma with t(v;11q23.3);KMT2A Rearranged	0	0	3	9	0	0	0.33		0
Subcutaneous Panniculitis-Like T-Cell Lymphoma	0	0	0	1	0	0	0
Lymphoplasmacytic Lymphoma	0	0	7	67	0	0	0.1		0
AML with Recurrent Genetic Abnormalities	0	0	0	8	0	0	0
Myeloid Sarcoma	0	0	0	17	0	0	0
Natural Killer (NK) Cell Lymphoblastic Leukemia/Lymphoma	0	0	0	5	0	0	0
Adenosquamous Carcinoma of the Tongue	0	0	1	1	0	0	1		0
Mixed Type Metaplastic Breast Cancer	0	0	5	7	0	0	0.71		0
Mixed Phenotype Acute Leukemia, T/Myeloid, NOS	0	0	0	39	0	0	0
Primary Myelofibrosis, Prefibrotic/Early Stage	0	0	0	3	0	0	0
Inflammatory Myofibroblastic Bladder Tumor	0	0	1	1	0	0	1		0
B-Lymphoblastic Leukemia/Lymphoma with t(9;22)(q34.1;q11.2);BCR-ABL1	0	0	0	38	0	0	0
Myeloid/Lymphoid Neoplasms with Eosinophilia and Rearrangement of PDGFRA/PDGFRB or FGFR1 or with PCM1-JAK2	0	0	0	1	0	0	0
T-Cell/Histiocyte-Rich Large B-Cell Lymphoma	0	0	0	15	0	0	0
Malignant Glomus Tumor	0	0	0	1	0	0	0
AML with t(8;21)(q22;q22.1);RUNX1-RUNX1T1	0	1	0	31	0	0.03	0	0
Follicular T-Cell Lymphoma	0	0	0	1	0	0	0
Adamantinoma	0	0	1	4	0	0	0.25		0
MDS with Single Lineage Dysplasia	0	0	0	13	0	0	0
Tubular Adenoma of the Colon	0	0	1	17	0	0	0.06		0
AML with Mutated RUNX1	0	0	0	18	0	0	0
Atypical Chronic Myeloid Leukemia, BCR-ABL1-	0	0	0	2	0	0	0
Monoclonal B-Cell Lymphocytosis	0	0	1	11	0	0	0.09		0
Chronic Lymphoproliferative Disorder of NK Cells	0	0	0	6	0	0	0
Primary CNS Melanocytic Tumors	0	0	0	1	0	0	0
AML with Biallelic Mutations of CEBPA	0	0	0	11	0	0	0
Urothelial Papilloma	0	0	0	4	0	0	0
Adenosquamous Carcinoma of the Gallbladder	0	1	7	12	0	0.08	0.58	0	0	1	no
MDS, Unclassifiable	0	0	0	3	0	0	0
Hairy Cell Leukemia-Variant	0	0	1	1	0	0	1		0
Juvenile Myelomonocytic Leukemia	0	0	0	16	0	0	0
MDS with Ring Sideroblasts	0	0	0	11	0	0	0
Ganglioneuroma	0	0	0	4	0	0	0
Chronic Myelomonocytic Leukemia-2	0	0	1	11	0	0	0.09		0
Primary Cutaneous Gamma Delta T-Cell Lymphoma	0	0	0	7	0	0	0
B-Lymphoblastic Leukemia/Lymphoma with t(12;21)(p13.2;q22.1); ETV6-RUNX1	0	0	0	8	0	0	0
High-Grade B-Cell Lymphoma, NOS	0	2	1	11	0	0.18	0.09	0	0	1	no
B-Lymphoblastic Leukemia/Lymphoma, BCR-ABL1 Like	0	0	0	6	0	0	0
APL with PML-RARA	0	0	0	9	0	0	0
Pseudomyogenic Hemangioendothelioma	0	0	0	3	0	0	0
Juvenile Secretory Carcinoma of the Breast	0	0	0	2	0	0	0
Hepatosplenic T-cell Lymphoma	0	0	0	5	0	0	0
Anaplastic Large-Cell Lymphoma ALK Negative	0	0	2	11	0	0	0.18		0
Monomorphic Epitheliotropic Intestinal T-Cell Lymphoma	0	0	2	6	0	0	0.33		0
Plasmablastic Lymphoma	0	0	1	6	0	0	0.17		0
Melanocytoma	0	0	0	2	0	0	0
Extraosseous Plasmacytoma	0	0	1	4	0	0	0.25		0
Periosteal Osteosarcoma	0	0	0	3	0	0	0
Leiomyoma	0	0	0	7	0	0	0
Malignant Nonepithelial Tumor of the Liver	0	0	1	2	0	0	0.5		0
B-Lymphoblastic Leukemia/Lymphoma with t(1;19)(q23;p13.3);TCF3-PBX1	0	0	0	1	0	0	0
NUT Carcinoma of the Lung	0	0	0	2	0	0	0
Myeloid/Lymphoid Neoplasms with FGFR1 Rearrangement	0	0	0	4	0	0	0
Ewing Sarcoma of Soft Tissue	0	0	2	13	0	0	0.15		0
AML with t(6;9)(p23;q34.1);DEK-NUP214	0	0	0	14	0	0	0
Extranodal NK-/T-Cell Lymphoma, Nasal Type	0	0	1	9	0	0	0.11		0
Anaplastic Large-Cell Lymphoma ALK Positive	0	0	0	5	0	0	0
Classical Hodgkin Lymphoma PTLD	0	0	1	1	0	0	1		0
Monoclonal Gammopathy of Undetermined Significance	0	0	3	13	0	0	0.23		0
Spindle Cell/Sclerosing Rhabdomyosarcoma	0	1	1	5	0	0.2	0.2	0	0	1	no
Clear Cell Borderline Ovarian Tumor	0	0	0	1	0	0	0
Basal Cell Carcinoma of Prostate	0	0	1	1	0	0	1		0
Inverted Urothelial Papilloma	0	0	0	1	0	0	0
Papillary Meningioma	0	0	0	1	0	0	0
Primary Cutaneous CD4 Positive Small/Medium T-Cell Lymphoproliferative Disorder	0	0	0	3	0	0	0
Infectious Mononucleosis PTLD	0	0	0	1	0	0	0
Metaplastic Adenosquamous Carcinoma	0	0	0	2	0	0	0
Early T-Cell Precursor Lymphoblastic Leukemia	0	0	0	7	0	0	0
Solitary Plasmacytoma of Bone	0	0	0	1	0	0	0
Breast Implant-Associated Anaplastic Large-Cell Lymphoma	0	0	0	3	0	0	0
Chronic Eosinophilic Leukemia, NOS	0	0	0	1	0	0	0
Gastrointestinal Neuroendocrine Tumors of the Esophagus/Stomach	0	0	0	4	0	0	0
Primary Cutaneous CD30 Positive T-Cell Lymphoproliferative Disorders	0	1	0	2	0	0.5	0	0
Basal Cell Adenocarcinoma	0	0	0	2	0	0	0
Nodal Peripheral T-Cell Lymphoma with TFH Phenotype	0	0	1	4	0	0	0.25		0
Primary Cutaneous DLBCL, Leg Type	0	0	0	2	0	0	0
Placental Site Trophoblastic Tumor	0	0	1	2	0	0	0.5		0
Chronic Neutrophilic Leukemia	0	0	0	2	0	0	0
Osteoclastic Giant Cell Tumor	0	0	0	1	0	0	0
Low-grade Appendiceal Mucinous Neoplasm	0	0	1	8	0	0	0.12		0
Cervical Leiomyosarcoma	0	0	0	1	0	0	0
Adenoid Cystic Carcinoma of the Lacrimal Gland	0	0	0	1	0	0	0
ALK Positive Large B-Cell Lymphoma	0	0	0	1	0	0	0
Myopericytoma	0	0	0	1	0	0	0
Carcinoma ex Pleomorphic Adenoma	0	0	1	3	0	0	0.33		0
Indeterminate Dendritic Cell Tumor	0	0	0	1	0	0	0
Cervical Adenocarcinoma In Situ	0	0	0	3	0	0	0
Pleomorphic Adenoma	0	0	0	1	0	0	0
Amyloidosis	0	0	0	1	0	0	0
Myeloid/Lymphoid Neoplasms with PCM1-JAK2	0	0	0	1	0	0	0
IgG	0	0	0	1	0	0	0
Intravascular Large B-Cell Lymphoma	0	0	0	2	0	0	0
Spitzoid Melanoma	0	0	2	6	0	0	0.33		0
Gastric Remnant Adenocarcinoma	0	0	0	1	0	0	0
Atypical Fibroxanthoma	0	0	2	3	0	0	0.67		0
Soft Tissue	0	0	0	8	0	0	0
Interdigitating Dendritic Cell Sarcoma	0	0	1	2	0	0	0.5		0
Desmoplastic Trichoepithelioma	0	0	0	1	0	0	0
Mucoepidermoid Carcinoma of the Lung	0	0	1	4	0	0	0.25		0
Fibroblastic Reticular Cell Tumor	0	0	0	1	0	0	0
Ovarian Choriocarcinoma, NOS	0	0	0	2	0	0	0
Activated B-cell Type	0	0	2	3	0	0	0.67		0
Germinal Center B-Cell Type	0	0	0	2	0	0	0
Myeloid	0	0	0	1	0	0	0
Liver	0	0	0	3	0	0	0
Chordoid Glioma of the Third Ventricle	0	0	0	3	0	0	0
Ampulla of Vater	0	0	1	1	0	0	1		0
Kidney	0	0	0	1	0	0	0
Embryonal Tumor with Abundant Neuropil and True Rosettes	0	0	3	8	0	0	0.38		0
Clear Cell Ependymoma	0	0	0	2	0	0	0
Cystic Tumor of the Pancreas	0	0	0	1	0	0	0
B-Lymphoblastic Leukemia/Lymphoma with Recurrent Genetic Abnormalities	0	1	0	3	0	0.33	0	0
Clear cell Meningioma	0	0	0	2	0	0	0
Biliary Tract	0	0	1	2	0	0	0.5		0
Chordoid Meningioma	0	0	0	1	0	0	0
Breast Fibroepithelial Neoplasms	0	0	0	1	0	0	0
Dysplastic Gangliocytoma of the Cerebellum/Lhermitte-Duclos Disease	0	0	0	1	0	0	0
Vulva/Vagina	0	0	0	3	0	0	0
Myofibromatosis	0	0	0	1	0	0	0
Uterus	0	0	2	3	0	0	0.67		0
Villoglandular Adenocarcinoma of the Cervix	0	0	0	1	0	0	0
Peripheral Nervous System	0	0	0	1	0	0	0
Carcinoma with Osseous Metaplasia	0	0	0	1	0	0	0
Acute Undifferentiated Leukemia	0	0	0	1	0	0	0
Epithelial Type Metaplastic Breast Cancer	0	0	2	2	0	0	1		0
Salivary Gland-Type Tumor of the Lung	0	0	0	1	0	0	0
Microcystic Adnexal Carcinoma	0	0	0	1	0	0	0
Primary Cutaneous Follicle Center Lymphoma	0	0	0	1	0	0	0
Papillary Thyroid Cancer	1	18	48	999	0	0.02	0.05	0.06	0.02	0.75	no
Acute Myeloid Leukemia	4	16	217	2066	0	0.01	0.11	0.25	0.02	0.11	no
Myeloproliferative Neoplasms	1	3	23	516	0	0.01	0.04	0.33	0.04	0.27	no
Adenoid Cystic Carcinoma	1	7	34	417	0	0.02	0.08	0.14	0.03	0.75	no
Oligodendroglioma	1	14	28	372	0	0.04	0.08	0.07	0.04	0.8	no
Myeloid Neoplasm	5	10	67	1656	0	0.01	0.04	0.5	0.07	0.0002	yes
Anal Squamous Cell Carcinoma	1	23	31	274	0	0.08	0.11	0.04	0.03	1	no
Appendiceal Adenocarcinoma	1	2	98	257	0	0.01	0.38	0.5	0.01	0.9	no
Follicular Lymphoma	2	10	46	493	0	0.02	0.09	0.2	0.04	0.48	no
Myelodysplastic Syndromes	3	4	102	733	0	0.01	0.14	0.75	0.03	0.04	yes

## Sheet: S3
Table S3. Enrichment of RB1/TP53 co-mutation in dead or alive patients
CANCER_TYPE_DETAILED	dead_pv	alive_pv	dead_padj	alive_padj
Prostate Adenocarcinoma	7.4e-24	1	2e-21	1
Breast Invasive Ductal Carcinoma	2.2e-23	1	2.9e-21	1
Lung Adenocarcinoma	5.3e-09	1	4.7e-07	1
Breast Invasive Lobular Carcinoma	2.1e-05	1	0.0014	1
Invasive Breast Carcinoma	0.00022	1	0.012	1
Oropharynx Squamous Cell Carcinoma	0.00027	1	0.012	1
Merkel Cell Carcinoma	0.00064	1	0.024	1
Gastrointestinal Stromal Tumor	0.00098	1	0.031	1
Pancreatic Adenocarcinoma	0.0011	0.999	0.031	1
Leiomyosarcoma	0.0012	0.999	0.031	1
Breast Mixed Ductal and Lobular Carcinoma	0.0013	0.999	0.032	1
Bladder Urothelial Carcinoma	0.0019	0.999	0.042	1
Acute Myeloid Leukemia	0.0068	1	0.14	1
Plasma Cell Myeloma	0.013	0.999	0.24	1
Breast Invasive Carcinoma, NOS	0.023	0.993	0.4	1
Neuroendocrine Tumor, NOS	0.027	0.993	0.44	1
Solitary Fibrous Tumor/Hemangiopericytoma	0.028	0.996	0.44	1
Pancreatic Neuroendocrine Tumor	0.032	0.989	0.44	1
Uterine Neuroendocrine Carcinoma	0.033	1	0.44	1
Poorly Differentiated Thyroid Cancer	0.034	0.997	0.44	1
B-Lymphoblastic Leukemia/Lymphoma	0.035	0.999	0.44	1
Anaplastic Large Cell Lymphoma	0.036	1	0.44	1
Small Cell Carcinoma of Unknown Primary	0.04	0.991	0.46	1
Ovarian Cancer, Other	0.044	1	0.48	1
Mucinous Adenocarcinoma of the Appendix	0.048	1	0.48	1
Duodenal Adenocarcinoma	0.051	1	0.48	1
Mature B-Cell Neoplasms	0.052	0.998	0.48	1
Malignant Peripheral Nerve Sheath Tumor	0.053	0.99	0.48	1
Myeloproliferative Neoplasms	0.053	1	0.48	1
Undifferentiated Malignant Neoplasm	0.054	0.99	0.48	1
Anaplastic Ependymoma	0.061	1	0.52	1
Chronic Lymphocytic Leukemia/Small Lymphocytic Lymphoma	0.062	0.985	0.52	1
Medullary Thyroid Cancer	0.066	1	0.53	1
Uterine Clear Cell Carcinoma	0.079	0.992	0.59	1
Breast Invasive Cancer, NOS	0.083	0.969	0.59	1
Ewing Sarcoma	0.084	1	0.59	1
Small Bowel Well-Differentiated Neuroendocrine Tumor	0.087	0.994	0.59	1
Esophageal Adenocarcinoma	0.088	0.955	0.59	1
Hurthle Cell Thyroid Cancer	0.093	0.994	0.59	1
Malignant Phyllodes Tumor of the Breast	0.093	0.99	0.59	1
Papillary Thyroid Cancer	0.099	1	0.59	1
Wilms' Tumor	0.1	1	0.59	1
Clear Cell Ovarian Cancer	0.1	0.978	0.59	1
Marginal Zone Lymphoma	0.1	1	0.59	1
Adrenocortical Adenoma	0.1	1	0.59	1
Colorectal Adenocarcinoma	0.12	0.938	0.69	1
Adenocarcinoma, NOS	0.13	0.923	0.71	1
Uterine Endometrioid Carcinoma	0.13	0.926	0.72	1
Atypical Lung Carcinoid	0.13	0.99	0.71	1
Serous Borderline Ovarian Tumor, Micropapillary	0.13	1	0.71	1
Adrenocortical Carcinoma	0.14	0.946	0.73	1
Lymphoid Neoplasm	0.14	1	0.73	1
Diffuse Glioma	0.16	0.954	0.75	1
Myelodysplastic Syndromes	0.16	0.984	0.75	1
Mammary Analogue Secretory Carcinoma of Salivary Gland Origin	0.16	1	0.75	1
Alveolar Soft Part Sarcoma	0.17	1	0.75	1
Meningothelial Tumor	0.17	1	0.75	1
Large Cell/Anaplastic Medulloblastoma	0.17	1	0.75	1
Sweat Gland Carcinoma/Apocrine Eccrine Carcinoma	0.17	1	0.75	1
High-Grade Glioma, NOS	0.18	0.907	0.78	1
Lung Neuroendocrine Tumor	0.18	0.951	0.78	1
Extramammary Paget Disease	0.18	0.993	0.79	1
Esophagogastric Adenocarcinoma	0.22	0.928	0.91	1
Plasmacytoid/Signet Ring Cell Bladder Carcinoma	0.23	1	0.96	1
Gastrointestinal Neuroendocrine Tumors	0.24	0.938	0.96	1
Mantle Cell Lymphoma	0.24	0.946	0.96	1
Renal Cell Carcinoma	0.24	0.931	0.96	1
Uterine Mixed Endometrial Carcinoma	0.25	0.918	0.96	1
Small Cell Carcinoma of the Ovary	0.25	0.967	0.96	1
Adenosquamous Carcinoma of the Pancreas	0.26	1	0.96	1
Stomach Adenocarcinoma	0.26	0.866	0.96	1
Anaplastic Oligodendroglioma	0.26	0.905	0.96	1
Soft Tissue Myoepithelial Carcinoma	0.26	1	0.96	1
Cutaneous Melanoma	0.27	0.833	0.96	1
T-Cell Prolymphocytic Leukemia	0.27	1	0.96	1
Astrocytoma	0.28	0.872	0.97	1
Mucinous Adenocarcinoma of the Colon and Rectum	0.29	0.955	1	1
Squamous Cell Carcinoma of the Vulva/Vagina	0.29	0.931	0.99	1
Poorly Differentiated Carcinoma, NOS	0.31	0.791	1	1
Diffuse Type Stomach Adenocarcinoma	0.31	1	1	1
Giant Cell Tumor of Bone	0.33	1	1	1
Well-Differentiated Liposarcoma	0.33	1	1	1
Follicular Thyroid Cancer	0.34	0.968	1	1
High-Grade Neuroepithelial Tumor	0.34	1	1	1
Salivary Carcinoma, Other	0.36	0.944	1	1
Sarcoma, NOS	0.37	0.756	1	1
Papillary Renal Cell Carcinoma	0.37	1	1	1
Small Bowel Cancer	0.38	0.885	1	1
Poorly Differentiated Carcinoma of the Stomach	0.39	0.915	1	1
Osteosarcoma	0.41	0.735	1	1
High-Grade Neuroendocrine Carcinoma of the Colon and Rectum	0.41	0.786	1	1
Nasopharyngeal Carcinoma	0.41	1	1	1
Intestinal Type Stomach Adenocarcinoma	0.42	1	1	1
Non-Small Cell Lung Cancer	0.43	0.651	1	1
Rectal Adenocarcinoma	0.44	0.695	1	1
Cancer of Unknown Primary, NOS	0.44	0.746	1	1
Adenoid Cystic Carcinoma	0.45	1	1	1
Renal Non-Clear Cell Carcinoma	0.45	0.955	1	1
Appendiceal Adenocarcinoma	0.47	1	1	1
Uterine Serous Carcinoma/Uterine Papillary Serous Carcinoma	0.47	0.66	1	1
Signet Ring Cell Type of the Appendix	0.48	1	1	1
Adenocarcinoma of the Gastroesophageal Junction	0.48	0.778	1	1
High-Grade Serous Ovarian Cancer	0.48	0.573	1	1
Cervical Adenosquamous Carcinoma	0.48	1	1	1
Perivascular Epithelioid Cell Tumor	0.49	0.759	1	1
Diffuse Large B-Cell Lymphoma, NOS	0.5	0.72	1	1
Peritoneal Mesothelioma	0.5	0.916	1	1
Oral Cavity Squamous Cell Carcinoma	0.5	0.673	1	1
Pleomorphic Liposarcoma	0.5	0.748	1	1
Urachal Carcinoma	0.5	1	1	1
Intestinal Ampullary Carcinoma	0.5	1	1	1
Cervical Squamous Cell Carcinoma	0.52	0.826	1	1
Thymic Carcinoma	0.53	0.779	1	1
Acinic Cell Carcinoma	0.53	1	1	1
Peripheral T-Cell lymphoma, NOS	0.54	0.901	1	1
Dedifferentiated Liposarcoma	0.54	0.897	1	1
Small Cell Lung Cancer	0.54	0.56	1	1
Anaplastic Astrocytoma	0.54	0.639	1	1
Yolk Sac Tumor	0.54	0.901	1	1
Anaplastic Oligoastrocytoma	0.55	0.803	1	1
Esophageal Poorly Differentiated Carcinoma	0.55	0.835	1	1
Cancer of Unknown Primary	0.56	0.554	1	1
Hypopharynx Squamous Cell Carcinoma	0.58	1	1	1
Larynx Squamous Cell Carcinoma	0.58	0.728	1	1
Melanoma of Unknown Primary	0.59	0.674	1	1
Melanoma	0.6	0.509	1	1
Pleural Mesothelioma, Biphasic Type	0.6	0.785	1	1
Low-Grade Serous Ovarian Cancer	0.61	0.825	1	1
Rhabdomyosarcoma	0.62	0.738	1	1
Squamous Cell Carcinoma, NOS	0.62	0.529	1	1
Uterine Undifferentiated Carcinoma	0.63	0.769	1	1
Solid Papillary Carcinoma of the Breast	0.64	0.846	1	1
Chromophobe Renal Cell Carcinoma	0.64	0.62	1	1
Skin Adnexal Carcinoma	0.64	0.863	1	1
Salivary Carcinoma	0.65	0.853	1	1
Uterine Epithelioid Leiomyosarcoma	0.66	0.848	1	1
Undifferentiated Pleomorphic Sarcoma/Malignant Fibrous Histiocytoma/High-Grade Spindle Cell Sarcoma	0.67	0.442	1	1
Uterine Adenosarcoma	0.67	0.832	1	1
Signet Ring Cell Adenocarcinoma of the Colon and Rectum	0.67	0.833	1	1
Mycosis Fungoides	0.67	0.683	1	1
Breast Ductal Carcinoma In Situ	0.67	0.824	1	1
Undifferentiated Stomach Adenocarcinoma	0.67	1	1	1
Pleural Mesothelioma	0.67	0.635	1	1
Sinonasal Undifferentiated Carcinoma	0.67	0.833	1	1
High-Grade Surface Osteosarcoma	0.67	1	1	1
Well-Differentiated Neuroendocrine Tumors of the Stomach	0.67	1	1	1
Neuroendocrine Carcinoma, NOS	0.68	0.453	1	1
Hepatocellular Carcinoma	0.69	0.473	1	1
Liposarcoma	0.69	0.766	1	1
Synovial Sarcoma	0.7	0.802	1	1
Acinar Cell Carcinoma of the Pancreas	0.71	0.795	1	1
Chondrosarcoma	0.71	0.625	1	1
Poorly Differentiated Non-Small Cell Lung Cancer	0.72	0.426	1	1
Basal Cell Carcinoma	0.72	0.718	1	1
Gliosarcoma	0.72	0.573	1	1
Undifferentiated Carcinoma of the Pancreas	0.73	1	1	1
Renal Clear Cell Carcinoma	0.73	0.578	1	1
Bladder Squamous Cell Carcinoma	0.73	0.743	1	1
Bladder Adenocarcinoma	0.73	0.525	1	1
Salivary Duct Carcinoma	0.73	0.567	1	1
Gallbladder Cancer	0.74	0.5	1	1
Unclassified Renal Cell Carcinoma	0.74	0.767	1	1
Pleural Mesothelioma, Sarcomatoid Type	0.75	1	1	1
Spindle Cell Carcinoma of the Lung	0.75	1	1	1
Ovarian Carcinosarcoma/Malignant Mixed Mesodermal Tumor	0.77	0.404	1	1
Uterine Leiomyosarcoma	0.78	0.316	1	1
Prostate Neuroendocrine Carcinoma	0.78	0.514	1	1
Hepatocellular Carcinoma plus Intrahepatic Cholangiocarcinoma	0.79	1	1	1
Lung Squamous Cell Carcinoma	0.79	0.269	1	1
Large Cell Neuroendocrine Carcinoma	0.79	0.333	1	1
Small Cell Glioblastoma	0.8	1	1	1
Combined Small Cell Lung Carcinoma	0.8	0.5	1	1
Head and Neck Squamous Cell Carcinoma of Unknown Primary	0.81	0.586	1	1
Glioblastoma Multiforme	0.82	0.225	1	1
Lung Adenosquamous Carcinoma	0.82	0.605	1	1
Esophageal Squamous Cell Carcinoma	0.82	0.315	1	1
Cutaneous Squamous Cell Carcinoma	0.83	0.286	1	1
Gastric Type Mucinous Carcinoma	0.84	0.602	1	1
Urethral Urothelial Carcinoma	0.85	0.575	1	1
Breast Invasive Mixed Mucinous Carcinoma	0.86	0.417	1	1
Signet Ring Cell Carcinoma of the Stomach	0.87	0.524	1	1
Breast	0.87	0.325	1	1
Sarcomatoid Renal Cell Carcinoma	0.87	0.579	1	1
Endometrioid Ovarian Cancer	0.88	0.333	1	1
Breast Neoplasm, NOS	0.88	0.527	1	1
Myxofibrosarcoma	0.89	0.288	1	1
Pleural Mesothelioma, Epithelioid Type	0.89	0.255	1	1
Pleomorphic Rhabdomyosarcoma	0.9	0.5	1	1
Colon Adenocarcinoma	0.9	0.134	1	1
Urethral Cancer	0.9	0.7	1	1
Upper Tract Urothelial Carcinoma	0.91	0.189	1	1
Uterine Sarcoma, Other	0.91	0.407	1	1
Gallbladder Adenocarcinoma, NOS	0.92	0.371	1	1
Ovarian Epithelial Tumor	0.92	0.205	1	1
Uterine Perivascular Epithelioid Cell Tumor	0.92	0.406	1	1
Metaplastic Breast Cancer	0.93	0.37	1	1
Endometrial Carcinoma	0.93	0.178	1	1
Uterine Carcinosarcoma/Uterine Malignant Mixed Mullerian Tumor	0.93	0.113	1	1
Mixed Ovarian Carcinoma	0.93	0.248	1	1
Extrahepatic Cholangiocarcinoma	0.94	0.321	1	1
Cholangiocarcinoma	0.95	0.115	1	1
Ampullary Carcinoma	0.95	0.167	1	1
Sebaceous Carcinoma	0.95	0.348	1	1
Uterine Sarcoma/Mesenchymal	0.95	0.524	1	1
Serous Ovarian Cancer	0.95	0.152	1	1
Head and Neck Squamous Cell Carcinoma	0.96	0.096	1	1
Intrahepatic Cholangiocarcinoma	0.97	0.147	1	1
Angiosarcoma	0.97	0.182	1	1
Anaplastic Thyroid Cancer	0.97	0.126	1	1
Head and Neck Neuroendocrine Carcinoma	0.97	0.231	1	1
Prostate Small Cell Carcinoma	0.97	0.19	1	1
Glioblastoma	0.98	0.031	1	1
Undifferentiated Uterine Sarcoma	0.98	0.318	1	1
Small Cell Bladder Cancer	0.99	0.118	1	1
Medulloblastoma	1	0.517	1	1
Ganglioglioma	1	0.939	1	1
Low-Grade Glioma, NOS	1	0.871	1	1
Oligodendroglioma	1	0.89	1	1
Burkitt Lymphoma	1	1	1	1
Primitive Neuroectodermal Tumor	1	0.455	1	1
Chordoma	1	0.704	1	1
Schwannoma	1	0.978	1	1
Myeloid Neoplasm	1	0.765	1	1
Follicular Lymphoma	1	0.864	1	1
Other Uterine Tumor	1	0.625	1	1
Sarcomatoid Carcinoma of the Urinary Bladder	1	0.2	1	1
Diffuse Astrocytoma	1	0.966	1	1
Desmoplastic Melanoma	1	0.725	1	1
Pleomorphic Carcinoma of the Lung	1	0.69	1	1
Sarcomatoid Carcinoma of the Lung	1	0.013	1	1
Large Cell Lung Carcinoma	1	0.393	1	1
Head and Neck Carcinoma, Other	1	0.368	1	1
Pancreatobiliary Ampullary Carcinoma	1	0.098	1	1
Goblet Cell Adenocarcinoma of the Appendix	1	0.6	1	1
Peritoneal Serous Carcinoma	1	0.857	1	1
Renal Small Cell Carcinoma	1	1	1	1
Lung Carcinoid	1	0.932	1	1
Oligoastrocytoma	1	0.727	1	1
Breast Carcinoma with Signet Ring	1	0.667	1	1
Anal Squamous Cell Carcinoma	1	0.51	1	1
Seminoma	1	0.925	1	1
Pituitary Adenoma	1	0.959	1	1
Mucinous Ovarian Cancer	1	0.527	1	1
Thymoma	1	0.74	1	1
Cervical Adenocarcinoma	1	0.655	1	1
Renal Angiomyolipoma	1	0.875	1	1
Sinonasal Squamous Cell Carcinoma	1	0.308	1	1
Radiation-Associated Sarcoma	1	0.556	1	1
Embryonal Tumor	1	0.765	1	1
Primary Mediastinal (Thymic) Large B-Cell Lymphoma	1	0.909	1	1
Uterine Dedifferentiated Carcinoma	1	0.458	1	1
Dedifferentiated Chondrosarcoma	1	0.233	1	1
Small Cell Carcinoma of the Cervix	1	0.75	1	1
Miscellaneous Brain Tumor	1	0.833	1	1
Poorly Differentiated Vaginal Carcinoma	1	0.4	1	1
Urethral Adenocarcinoma	1	0.556	1	1
Inflammatory Breast Cancer	1	0.093	1	1
Medullary Carcinoma of the Colon	1	0.8	1	1
Small Cell Carcinoma of the Stomach	1	0.667	1	1
Uterine Adenosquamous Carcinoma	1	0.667	1	1
Osteoblastic Osteosarcoma	1	0.178	1	1
Chondroblastic Osteosarcoma	1	0.604	1	1
Bone	1	1	1	1
Acinar Cell Carcinoma, NOS	1	1	1	1
Therapy-Related Myeloid Neoplasms	1	0.966	1	1
Parathyroid Carcinoma	1	1	1	1
Glioma, NOS
Embryonal Rhabdomyosarcoma
Atypical Teratoid/Rhabdoid Tumor
Neuroblastoma
B-Lymphoblastic Leukemia/Lymphoma, NOS
Meningioma
UNKNOWN
Pineoblastoma
Dysembryoplastic Neuroepithelial Tumor
Transient Abnormal Myelopoiesis
Ependymoma
Choroid Plexus Papilloma
Hepatoblastoma
Monomorphic PTLD (B- and T-/NK-cell types)
Myeloid Leukemia Associated with Down Syndrome
Pleuropulmonary Blastoma
Acute Myelomonocytic Leukemia
Acute Monoblastic/Monocytic Leukemia
Chronic Myelogenous Leukemia
T-Lymphoblastic Leukemia/Lymphoma
Craniopharyngioma, Adamantinomatous Type
Inflammatory Myofibroblastic Tumor
Hodgkin Lymphoma
Nodular Sclerosis Classical Hodgkin Lymphoma
Choroid Plexus Carcinoma
Neurofibroma
Lymphoid Benign
Posttransplant Lymphoproliferative Disorders
Langerhans Cell Histiocytosis
Mixed Germ Cell Tumor
Atypical Nevus
Histiocytic and Dendritic Cell Neoplasms
Medulloepithelioma
Diffuse Intrinsic Pontine Glioma
Rosai-Dorfman Disease
Mixed Phenotype Acute Leukemia, B/Myeloid, NOS
Undifferentiated Embryonal Sarcoma of the Liver
Burkitt-Like Lymphoma with 11q Aberration
Round Cell Sarcoma, NOS
Infantile Fibrosarcoma
Solid Pseudopapillary Neoplasm of the Pancreas
Acute Megakaryoblastic Leukemia
B-Lymphoblastic Leukemia/Lymphoma with iAMP21
Teratoma
AML, NOS
Ganglioneuroblastoma
Sinonasal Adenocarcinoma
Therapy-Related Acute Myeloid Leukemia
Sertoli-Leydig Cell Tumor
Immature Teratoma
B-Lymphoblastic Leukemia/Lymphoma with Hyperdiploidy
Disseminated Juvenile Xanthogranuloma
Angiomatoid Fibrous Histiocytoma
Dysgerminoma
Desmoid/Aggressive Fibromatosis
Retinoblastoma
Hemangioblastoma
Alveolar Rhabdomyosarcoma
Uveal Melanoma
Breast Angiosarcoma
Fibrosarcoma
Subependymoma
Renal Neuroendocrine Tumor
Breast Sarcoma
Head and Neck Mucosal Melanoma
Smooth Muscle Neoplasm, NOS
Dedifferentiated Chordoma
Myxoid Chondrosarcoma
Endometrial Stromal Sarcoma
Primary Cutaneous CD8 Positive Aggressive Epidermotropic Cytotoxic T-Cell Lymphoma
Anorectal Mucosal Melanoma
Acute Leukemias of Ambiguous Lineage
Non-Hodgkin Lymphoma
Rhabdoid Meningioma
Anaplastic Meningioma
Angioimmunoblastic T-Cell Lymphoma
Myelodysplastic/Myeloproliferative Neoplasms
Acral Melanoma
Clear Cell Sarcoma
Lung Adenocarcinoma In Situ
Pilocytic Astrocytoma
Proliferating Pilar Cystic Tumor
Intimal Sarcoma
Conjunctival Melanoma
Ocular Melanoma
Mucosal Melanoma of the Vulva/Vagina
Oncocytic Adenoma of the Thyroid
Hepatocellular Adenoma
Aggressive Digital Papillary Adenocarcinoma
Adult T-Cell Leukemia/Lymphoma
Myeloid Atypical
Epithelioid Sarcoma
Atypical Lipomatous Tumor
Spindle Cell Rhabdomyosarcoma
Hemangiopericytoma of the Central Nervous System
Adenoid Cystic Carcinoma of the Lung
High-Grade Endometrial Stromal Sarcoma
High-Grade Neuroendocrine Carcinoma of the Esophagus
Myxoid/Round-Cell Liposarcoma
B-Cell Lymphoma, Unclassifiable, with Features Intermediate between DLBCL and Classical Hodgkin lymphoma
Mucoepidermoid Carcinoma
Pheochromocytoma
Clear Cell Sarcoma of Kidney
Small Intestinal Carcinoma
Renal Medullary Carcinoma
T-Cell Large Granular Lymphocytic Leukemia
Signet Ring Mucinous Carcinoma
Conventional Type Chordoma
Blastic Plasmacytoid Dendritic Cell Neoplasm
Inflammatory Myofibroblastic Lung Tumor
Renal Oncocytoma
Uterine Leiomyoma
Serous Borderline Ovarian Tumor
Atypical Meningioma
Choriocarcinoma
Cervical Endometrioid Carcinoma
Desmoplastic/Nodular Medulloblastoma
Paraganglioma
Uterine Myxoid Leiomyosarcoma
Intraductal Papillary Mucinous Neoplasm
Chronic Myelomonocytic Leukemia
Central Neurocytoma
Waldenstrom Macroglobulinemia
Hemangioma
Proximal-Type Epithelioid Sarcoma
Primary Brain Tumor
Papillary Stomach Adenocarcinoma
Myoepithelial Carcinoma
Malignant Lymphoma
Myxopapillary Ependymoma
Spindle Cell Oncocytoma of the Adenohypophysis
Hairy Cell Leukemia
Endocervical Adenocarcinoma
Granulosa Cell Tumor
Astroblastoma
Mature Teratoma
Primary Myelofibrosis
Histiocytic Dendritic Cell Sarcoma
Adenoid Cystic Breast Cancer
Myxoma
Translocation-Associated Renal Cell Carcinoma
Uterine Smooth Muscle Tumor of Uncertain Malignant Potential
Pleomorphic Xanthoastrocytoma
Mature T and NK Neoplasms
Dermatofibrosarcoma Protuberans
Sex Cord Stromal Tumor
Penile Squamous Cell Carcinoma
Polycythemia Vera
Thymic Neuroendocrine Tumor
Low-Grade Fibromyxoid Sarcoma
Mucinous Carcinoma
Miscellaneous Neuroepithelial Tumor
Collecting Duct Renal Cell Carcinoma
Olfactory Neuroblastoma
Testicular Lymphoma
Germinoma
Angiocentric Glioma
Non-Seminomatous Germ Cell Tumor
Pancreatoblastoma
Low-Grade Endometrial Stromal Sarcoma
Atypical Pituitary Adenoma
Essential Thrombocythemia
Endocrine Mucin Producing Sweat Gland Carcinoma
Mucinous Borderline Ovarian Tumor
Epithelial-Myoepithelial Carcinoma
Epithelioid Hemangioendothelioma
NUT Midline Carcinoma of the Head and Neck
Pituicytoma
Tenosynovial Giant Cell Tumor Diffuse Type
Ovarian Seromucinous Borderline Tumor
Embryonal Carcinoma
Giant Cell Carcinoma of the Lung
Fibrolamellar Carcinoma
Pilomyxoid Astrocytoma
Extraskeletal Myxoid Chondrosarcoma
Melanotic Schwannoma
Desmoplastic Small-Round-Cell Tumor
Pineal Parenchymal Tumor of Intermediate Differentiation
Hyalinizing Trabecular Adenoma of the Thyroid
Epithelioid Trophoblastic Tumor
Follicular Dendritic Cell Sarcoma
Colonic Type Adenocarcinoma of the Appendix
Prostate Squamous Cell Carcinoma
Mesonephric Carcinoma
Solitary Fibrous Tumor of the Central Nervous System
Tubular Stomach Adenocarcinoma
Germ Cell Tumor, Brain
Rhabdoid Cancer
Adenosquamous Carcinoma of the Stomach
Carcinoma with Chondroid Metaplasia
Anaplastic Ganglioglioma
Paget Disease of the Nipple
Primary Effusion Lymphoma
Breast Invasive Carcinosarcoma, NOS
Sezary Syndrome
Malignant Tumor
Ovarian Seromucinous Carcinoma
Low-Grade Neuroepithelial Tumor
Ependymomal Tumor
Gangliocytoma
Congenital Nevus
Pineal Tumor
Granular Cell Tumor
Mixed Cancer Types
Craniopharyngioma, Papillary Type
Adenomyoepithelioma of the Breast
Thymic Epithelial Tumor
Mucosal Melanoma of the Urethra
Erdheim-Chester Disease
Mucinous Stomach Adenocarcinoma
Porocarcinoma/Spiroadenocarcinoma
Urethral Squamous Cell Carcinoma
Pulmonary Lymphangiomyomatosis
Extranodal Marginal Zone Lymphoma of Mucosa-Associated Lymphoid Tissue (MALT lymphoma)
Sellar Tumor
Salivary Adenocarcinoma
Complete Hydatidiform Mole
Urachal Adenocarcinoma
Gestational Trophoblastic Disease
Clear Cell Papillary Renal Cell Carcinoma
Nerve Sheath Tumor
Well-Differentiated Neuroendocrine Tumor of the Rectum
Germ Cell Tumor with Somatic-Type Malignancy
Nodular Lymphocyte-Predominant Hodgkin Lymphoma
Primary DLBCL of the central nervous system
Sclerosing Epithelioid Fibrosarcoma
Renal Clear Cell Carcinoma with Sarcomatoid Features
Well-Differentiated Neuroendocrine Tumor of the Appendix
Liver Angiosarcoma
Testicular Mesothelioma
Cervical Clear Cell Carcinoma
Classical Hodgkin Lymphoma
Splenic Marginal Zone Lymphoma
Choroid Plexus Tumor
Metaplastic Squamous Cell Carcinoma
Cervical Rhabdomyosarcoma
Mesenchymal Chondrosarcoma
Poorly Differentiated Carcinoma of the Uterus
Myofibroma
Cervical Neuroendocrine Tumor
Chondroblastoma
Atypical Choroid Plexus Papilloma
Mucinous Cystic Neoplasm
Cervical Adenoid Cystic Carcinoma
Encapsulated Glioma
Well-Differentiated Thyroid Cancer
Metaplastic Carcinosarcoma
Perihilar Cholangiocarcinoma
Uterine Mucinous Carcinoma
High-Grade Neuroendocrine Carcinoma of the Ovary
Nodal Marginal Zone Lymphoma
Mixed Ampullary Carcinoma
High-Grade Serous Fallopian Tube Cancer
Mucinous Adenocarcinoma of the Vulva/Vagina
Vaginal Adenocarcinoma
Prostate
Head and Neck
Testis
Steroid Cell Tumor, NOS
Odontogenic Carcinoma
Skin
Lung
Ovary/Fallopian Tube
Pancreas
Bowel
Ovarian Germ Cell Tumor
Colon Adenocarcinoma In Situ
Clear Cell Carcinoma of the Lung
Systemic Mastocytosis
Other
Endometrioid Borderlin Ovarian Tumor
Thyroid
Adenocarcinoma In Situ
Primary Neuroepithelial Tumor
Papillary Tumor of the Pineal Region
Rosette-forming Glioneuronal Tumor of the Fourth Ventricle
Papillary Glioneuronal Tumor
Lentigo Maligna Melanoma
Desmoplastic Infantile Ganglioglioma
Cellular Schwannoma
Clear Cell Odontogenic Carcinoma
Ossifying Fibromyxoid Tumor
Small Cell Osteosarcoma
Renal Mucinous Tubular Spindle Cell Carcinoma
Dermatofibroma
Sweat Gland Adenocarcinoma
Primary CNS Melanoma
Therapy-Related Myelodysplastic Syndrome
Lymphoepithelioma-like Carcinoma of the Lung
FH-Deficient Renal Cell Carcinoma
Extraventricular Neurocytoma
Ovarian Seromucinous Adenoma
Mixed Cervical Carcinoma
Secondary Osteosarcoma
Intestinal Type Mucinous Carcinoma
Mucosal Melanoma of the Esophagus
Primary Myelofibrosis,Overt Fibrotic Stage
Basaloid Penile Squamous Cell Carcinoma
Basaloid Large Cell Carcinoma of the Lung
Anaplastic Pleomorphic Xanthoastrocytoma
Polycythaemia Vera Myelofibrosis
AML with Myelodysplasia-Related Changes
Extra Gonadal Germ Cell Tumor
Anal Gland Adenocarcinoma
Glomangiosarcoma
EBV Positive DLBCL, NOS
Serous Cystadenoma of the Pancreas
Myeloid Neoplasms with Germ Line Predisposition
MDS with excess blasts-2
Chronic Myeloid Leukemia, BCR-ABL1+
Ciliated Muconodular Papillary Tumor of the Lung
Telangiectatic Osteosarcoma
Parosteal Osteosarcoma
MDS with excess blasts-1
Fibrothecoma
MDS with Excess Blasts
Phyllodes Tumor of the Breast
Low-Grade Central Osteosarcoma
Uterine Mesonephric Carcinoma
MDS with Isolated Del(5q)
Spiroma/Spiradenoma
Chronic Myelomonocytic Leukemia-1
Fibroblastic Osteosarcoma
Glassy Cell Carcinoma of the Cervix
Essential Thrombocythemia Myelofibrosis
AML with Mutated NPM1
Chronic Myelomonocytic Leukemia-0
Histiocytic Sarcoma
Subcutaneous Panniculitis-Like T-Cell Lymphoma
AML with Recurrent Genetic Abnormalities
Myeloid Sarcoma
Natural Killer (NK) Cell Lymphoblastic Leukemia/Lymphoma
AML with inv(3)(q21.3q26.2) or t(3;3)(q21.3;q26.2); GATA2, MECOM
Pituitary Carcinoma
Adenosquamous Carcinoma of the Tongue
Mixed Type Metaplastic Breast Cancer
Systemic Mastocytosis with an Associated Hematological Neoplasm
Inflammatory Myofibroblastic Bladder Tumor
B-Lymphoblastic Leukemia/Lymphoma with t(9;22)(q34.1;q11.2);BCR-ABL1
Myeloid/Lymphoid Neoplasms with Eosinophilia and Rearrangement of PDGFRA/PDGFRB or FGFR1 or with PCM1-JAK2
T-Cell/Histiocyte-Rich Large B-Cell Lymphoma
Lymphoid Atypical
Malignant Glomus Tumor
AML with t(8;21)(q22;q22.1);RUNX1-RUNX1T1
Follicular T-Cell Lymphoma
Adamantinoma
MDS with Single Lineage Dysplasia
Tubular Adenoma of the Colon
AML with Mutated RUNX1
Atypical Chronic Myeloid Leukemia, BCR-ABL1-
Monoclonal B-Cell Lymphocytosis
MDS with Ring Sideroblasts and Multilineage Dysplasia
AML with t(9;11)(p21.3;q23.3);MLLT3-KMT2A
B-Lymphoblastic Leukemia/Lymphoma with t(v;11q23.3);KMT2A Rearranged
Chronic Lymphoproliferative Disorder of NK Cells
Primary CNS Melanocytic Tumors
AML with Biallelic Mutations of CEBPA
MDS/MPN, Unclassifiable
Urothelial Papilloma
Adenosquamous Carcinoma of the Gallbladder
MDS, Unclassifiable
MDS with Multilineage Dysplasia
AML with inv(16)(p13.1q22) or t(16;16)(p13.1;q22);CBFB-MYH11
Lymphoplasmacytic Lymphoma
Juvenile Myelomonocytic Leukemia
MDS with Ring Sideroblasts
Uterine Smooth Muscle Tumor
Ganglioneuroma
Mixed Phenotype Acute Leukemia, T/Myeloid, NOS
Chronic Myelomonocytic Leukemia-2
Primary Cutaneous Gamma Delta T-Cell Lymphoma
B-Lymphoblastic Leukemia/Lymphoma with t(12;21)(p13.2;q22.1); ETV6-RUNX1
MDS with Ring Sideroblasts and Single Lineage Dysplasia
High-Grade B-Cell Lymphoma, NOS
High-Grade B-Cell Lymphoma, with MYC and BCL2 and/or BCL6 Rearrangements
B-Lymphoblastic Leukemia/Lymphoma, BCR-ABL1 Like
APL with PML-RARA
Pseudomyogenic Hemangioendothelioma
Juvenile Secretory Carcinoma of the Breast
Hepatosplenic T-cell Lymphoma
Mixed Phenotype Acute Leukemia with t(9;22)(q34.1;q11.2); BCR-ABL1
Anaplastic Large-Cell Lymphoma ALK Negative
Monomorphic Epitheliotropic Intestinal T-Cell Lymphoma
Plasmablastic Lymphoma
Extraosseous Plasmacytoma
MDS/MPN with Ring Sideroblasts and Thrombocytosis
Periosteal Osteosarcoma
Spitzoid Melanoma
Gastric Remnant Adenocarcinoma
Atypical Fibroxanthoma
Low-grade Appendiceal Mucinous Neoplasm
Soft Tissue
Gastrointestinal Neuroendocrine Tumors of the Esophagus/Stomach
Leiomyoma
Interdigitating Dendritic Cell Sarcoma
Desmoplastic Trichoepithelioma
High-Grade Neuroendocrine Carcinoma of the Stomach
Mucoepidermoid Carcinoma of the Lung
Esophagus/Stomach
Fibroblastic Reticular Cell Tumor
Cervical Serous Carcinoma
Breast Lobular Carcinoma In Situ
Ovarian Choriocarcinoma, NOS
Activated B-cell Type
Germinal Center B-Cell Type
Ewing Sarcoma of Soft Tissue
Early T-Cell Precursor Lymphoblastic Leukemia
Liver
Chordoid Glioma of the Third Ventricle
Kidney
Embryonal Tumor with Abundant Neuropil and True Rosettes
Clear Cell Ependymoma
Cystic Tumor of the Pancreas
B-Lymphoblastic Leukemia/Lymphoma with Recurrent Genetic Abnormalities
CNS/Brain
Clear cell Meningioma
Biliary Tract
Spindle Cell/Sclerosing Rhabdomyosarcoma
Breast Implant-Associated Anaplastic Large-Cell Lymphoma
Chordoid Meningioma
Breast Fibroepithelial Neoplasms
B-Lymphoblastic Leukemia/Lymphoma with Hypodiploidy
Dysplastic Gangliocytoma of the Cerebellum/Lhermitte-Duclos Disease
Vulva/Vagina
Myofibromatosis
Bladder/Urinary Tract
Brenner Tumor
Cervical Adenocarcinoma In Situ
Uterus
Villoglandular Adenocarcinoma of the Cervix
Peripheral Nervous System
Basal Cell Adenocarcinoma
Carcinoma with Osseous Metaplasia
Acute Undifferentiated Leukemia
Carcinoma ex Pleomorphic Adenoma
Epithelial Type Metaplastic Breast Cancer
Salivary Gland-Type Tumor of the Lung
Peritoneum
Microcystic Adnexal Carcinoma
Mast Cell Sarcoma
Primary Cutaneous Follicle Center Lymphoma

## Sheet: S4
Table S4. Differential RPPA analysis
gene	comutant_t	comutant_pv	comutant_padj	TP53_t	TP53_pv	TP53_padj	RB1_t	RB1_pv	RB1_padj
Rb_Caution	-13.4	2.4e-37	5.1e-35	-2.59	0.0099	0.19	7.8	1.8e-14	1.3e-12
Rb_pS807_S811	-10.4	5.6e-24	6e-22	-1.39	0.16	0.68	6.5	1.4e-10	4.2e-09
p14 Arf(BetA300-340A)_Caution	8.7	1.7e-17	1.2e-15	0.41	0.69	0.96	1.47	0.14	0.31
Cyclin_E2_Caution	8.3	4e-16	2.2e-14	3.36	0.00082	0.047	-3.05	0.0023	0.018
Stathmin	6.82	1.7e-11	7.2e-10	1.71	0.088	0.65	-2.53	0.012	0.061
Cyclin_E1	5.9	5.3e-09	1.9e-07	2.45	0.014	0.22	-4.63	4.2e-06	8.1e-05
c-Kit	5.82	8.3e-09	2.5e-07	0.91	0.36	0.87	-1.36	0.17	0.34
YAP_pS127_Caution	-5.61	2.7e-08	7.3e-07	-3.34	0.00087	0.047	5.05	5.4e-07	1.4e-05
Smad3	-5.39	9e-08	2.1e-06	-0.14	0.89	0.99	2.68	0.0074	0.042
Bim(EP1036)	5.38	9.6e-08	2.1e-06	0.18	0.86	0.99	-1.56	0.12	0.29
Bim(CST2933)	5.08	4.7e-07	9.2e-06	-0.06	0.95	0.99	-1.66	0.097	0.25
PTEN	-5.01	6.5e-07	1.2e-05	0.49	0.62	0.96	0.99	0.32	0.51
GSK3-alpha-beta	4.77	2.1e-06	3.5e-05	1.51	0.13	0.66	-3.68	0.00024	0.0035
YAP_Caution	-4.66	3.6e-06	5.5e-05	-1.87	0.062	0.58	3	0.0028	0.019
HER2_pY1248_Caution	-4.38	1.4e-05	0.00019	0.48	0.63	0.96	3.02	0.0026	0.018
HER2	-4.06	5.3e-05	0.00071	-0.05	0.96	0.99	1.68	0.093	0.25
PAI-1	-3.89	0.00011	0.0013	0.24	0.81	0.99	0.86	0.39	0.57
IGFBP2	3.83	0.00014	0.0016	1.37	0.17	0.68	-2.22	0.026	0.099
Gab2	3.72	0.00021	0.0024	2.02	0.044	0.49	-3.11	0.0019	0.017
EGFR_pY1068_Caution	-3.68	0.00025	0.0026	0.41	0.68	0.96	3.06	0.0023	0.018
IRS1	-3.64	0.00028	0.0029	-0.69	0.49	0.94	3.02	0.0026	0.018
Bcl-2	3.46	0.00057	0.0056	2.46	0.014	0.22	-7.02	4.4e-12	1.9e-10
p53_Caution	3.31	0.00097	0.009	-3.43	0.00063	0.047	7.63	6.3e-14	3.4e-12
Annexin 1	-3.29	0.001	0.009	-2.6	0.0094	0.19	3.84	0.00013	0.002
Myosin IIa pS1943	-3.29	0.001	0.009	-2.57	0.01	0.19	3.26	0.0011	0.011
Ku80_Caution	-3.21	0.0014	0.011	-0.52	0.6	0.96	3.3	0.001	0.01
NF-kB-p65_pS536_Caution	-3.18	0.0015	0.012	-1.67	0.095	0.65	2.92	0.0035	0.023
PCNA_Caution	3.17	0.0016	0.012	0.47	0.64	0.96	-3.39	0.00072	0.0081
Smad4	3.17	0.0016	0.012	-0.18	0.86	0.99	-2.12	0.034	0.12
Caveolin-1	-3.11	0.0019	0.014	-2.35	0.019	0.27	3.01	0.0027	0.018
Syk	3.1	0.002	0.014	0.65	0.51	0.94	-1.24	0.22	0.39
CD49b	-3.06	0.0023	0.015	-0.38	0.71	0.96	1.89	0.059	0.17
TAZ	-3.05	0.0024	0.015	-1.15	0.25	0.77	1.39	0.16	0.33
Acetyl-a-Tubulin (Lys40)_Caution	3.02	0.0026	0.016	-0.49	0.62	0.96	-1.53	0.13	0.31
GSK-3-BETA_Caution	2.99	0.0028	0.017	0.95	0.34	0.86	-2.08	0.038	0.13
AR	-2.91	0.0037	0.021	-2.06	0.039	0.47	2.56	0.011	0.056
B-Raf_pS445	2.91	0.0037	0.021	0.7	0.49	0.94	-2.26	0.024	0.094
PKC-alpha	-2.88	0.004	0.023	1.08	0.28	0.79	0.79	0.43	0.6
N-Cadherin	2.84	0.0046	0.025	-0.72	0.47	0.94	-1.37	0.17	0.34
BRCA2_Caution	-2.83	0.0048	0.025	0.03	0.98	0.99	2.25	0.025	0.094
PKC-delta_pS664	-2.82	0.0048	0.025	1.56	0.12	0.66	0.33	0.74	0.86
S6_pS235_S236	-2.78	0.0056	0.028	-1.51	0.13	0.66	1.18	0.24	0.41
PKC-alpha_pS657_Caution	-2.77	0.0057	0.028	0.62	0.53	0.94	0.94	0.34	0.52
Cyclin_D1	-2.77	0.0058	0.028	0.86	0.39	0.89	0.14	0.89	0.94
S6_pS240_S244	-2.72	0.0066	0.032	-1.47	0.14	0.66	1.4	0.16	0.33
XBP1_Caution	-2.69	0.0074	0.034	-0.04	0.97	0.99	0.39	0.69	0.82
eEF2K	-2.6	0.0096	0.044	-1.26	0.21	0.71	2.44	0.015	0.064
VEGFR2	-2.58	0.01	0.045	0.17	0.86	0.99	1.33	0.18	0.35
FASN	-2.55	0.011	0.047	0.07	0.94	0.99	0.33	0.74	0.86
MSH6_Caution	2.56	0.011	0.047	1.53	0.13	0.66	0.28	0.78	0.87
Caspase-8_Caution	-2.44	0.015	0.063	-0.73	0.47	0.94	1.16	0.25	0.41
Notch1	-2.43	0.015	0.063	2.99	0.0029	0.12	-3.4	0.00069	0.0081
eEF2_Caution	-2.37	0.018	0.073	-0.92	0.36	0.87	0.5	0.62	0.77
YB-1_pS102	-2.34	0.019	0.077	-0.24	0.81	0.99	0.66	0.51	0.69
ER-alpha	-2.32	0.021	0.081	-1.31	0.19	0.71	-0.56	0.58	0.72
Smad1	2.31	0.021	0.081	1.09	0.28	0.79	-1.91	0.057	0.17
4E-BP1_pS65	2.29	0.022	0.082	-0.21	0.83	0.99	-1.86	0.064	0.18
PI3K-p110-alpha_Caution	2.29	0.022	0.082	0.79	0.43	0.93	-0.47	0.64	0.78
Shc_pY317	-2.27	0.023	0.084	-0.34	0.73	0.96	0.88	0.38	0.56
JNK_pT183_Y185	-2.26	0.024	0.085	2.56	0.011	0.19	1.61	0.11	0.28
MSH2	2.27	0.024	0.084	1.8	0.072	0.6	0.2	0.84	0.92
14-3-3_epsilon_Caution	2.25	0.025	0.086	1.47	0.14	0.66	-3.06	0.0023	0.018
JNK2_Caution	-2.24	0.025	0.086	2.84	0.0046	0.17	-1.5	0.13	0.31
alpha-Catenin	-2.2	0.028	0.092	-1.45	0.15	0.66	1.36	0.18	0.34
FRA1_Caution	-2.18	0.029	0.092	-0.79	0.43	0.93	2.14	0.033	0.12
p27_pT157_Caution	2.19	0.029	0.092	-0.08	0.93	0.99	-0.45	0.65	0.79
p90RSK_Caution	2.18	0.029	0.092	1.87	0.062	0.58	-2.81	0.0051	0.031
TIGAR	-2.18	0.029	0.092	-1.74	0.082	0.65	-2.36	0.019	0.078
FOXO3a_Caution	2.16	0.031	0.096	-0.48	0.63	0.96	-0.49	0.62	0.77
p38_pT180_Y182	-2.16	0.031	0.096	-0.53	0.59	0.96	3.23	0.0013	0.012
Caspase-7_cleavedD198_Caution	2.15	0.032	0.096	0.69	0.49	0.94	0.33	0.74	0.86
p62 Lck ligand_Caution	-2.11	0.035	0.11	-2.22	0.027	0.36	-0.07	0.94	0.96
MIG-6	-2.09	0.037	0.11	-1.69	0.092	0.65	4.13	4e-05	0.00067
MEK1_pS217_S221	-2.02	0.043	0.13	-1.44	0.15	0.66	-0.59	0.56	0.72
PDK1	1.97	0.049	0.14	0.15	0.88	0.99	-4.69	3.1e-06	6.7e-05
STAT3_Caution	1.95	0.052	0.15	-0.97	0.33	0.85	-3.41	0.00069	0.0081
RSK1-2-3_Caution	1.94	0.053	0.15	1.12	0.26	0.78	-1.68	0.094	0.25
Bap1 c-4	1.92	0.055	0.15	0.87	0.39	0.89	1.57	0.12	0.29
MEK1	1.86	0.063	0.17	0.18	0.86	0.99	-0.68	0.5	0.68
EGFR	-1.84	0.065	0.17	-1.89	0.059	0.58	1.58	0.11	0.29
G6PD	-1.85	0.065	0.17	-1.44	0.15	0.66	1.77	0.076	0.21
Chk1_Caution	1.82	0.069	0.18	0.31	0.76	0.97	1.44	0.15	0.32
PKC-pan_BetaII_pS660	-1.81	0.071	0.18	0.38	0.71	0.96	-0.11	0.91	0.95
eIF4G_Caution	-1.8	0.072	0.18	-0.1	0.92	0.99	2.04	0.042	0.14
FoxM1	1.8	0.073	0.18	-1.3	0.19	0.71	2.87	0.0042	0.027
p27	1.79	0.074	0.18	0.39	0.69	0.96	-2.06	0.039	0.13
SHP-2_pY542_Caution	-1.79	0.074	0.18	0.54	0.59	0.96	1.65	0.099	0.26
4E-BP1_pT37_T46	1.78	0.075	0.18	-1.06	0.29	0.79	-0.86	0.39	0.57
HER3	-1.77	0.077	0.18	0.14	0.89	0.99	0.18	0.85	0.92
c-Myc_Caution	-1.74	0.082	0.2	0.4	0.69	0.96	1.97	0.05	0.16
Claudin-7	1.71	0.088	0.21	0.7	0.49	0.94	-0.57	0.57	0.72
XRCC1_Caution	1.69	0.092	0.21	0.5	0.62	0.96	1.47	0.14	0.31
GAPDH_Caution	-1.68	0.093	0.21	-0.58	0.56	0.96	-0.1	0.92	0.95
14-3-3_beta	-1.65	0.099	0.22	0.33	0.74	0.97	2.46	0.014	0.063
B-Raf_Caution	1.65	0.099	0.22	1.38	0.17	0.68	-1.77	0.077	0.21
VHL_Caution	1.65	0.1	0.22	0.66	0.51	0.94	-0.57	0.57	0.72
Heregulin	-1.58	0.11	0.25	-0.63	0.53	0.94	2.31	0.021	0.087
VAV1_Caution	1.61	0.11	0.24	0.04	0.96	0.99	0.13	0.9	0.94
Akt_pT308	1.56	0.12	0.26	-1.17	0.24	0.77	-0.41	0.68	0.82
Chk1_pS345_Caution	1.54	0.12	0.26	-0.12	0.9	0.99	2.29	0.022	0.09
Dvl3	1.54	0.12	0.26	0.32	0.75	0.97	-0.6	0.55	0.72
p70S6K	-1.57	0.12	0.25	1.25	0.21	0.71	-0.4	0.69	0.82
53BP1	1.53	0.13	0.26	-1.53	0.13	0.66	2.46	0.014	0.063
EGFR_pY1173	-1.5	0.13	0.27	0.45	0.66	0.96	2.39	0.017	0.073
Bid_Caution	-1.42	0.15	0.31	-0.05	0.96	0.99	0.58	0.56	0.72
HSP70_Caution	1.44	0.15	0.3	-1.01	0.31	0.81	-1.07	0.29	0.46
p70S6K_pT389	-1.44	0.15	0.3	0.87	0.38	0.89	0.86	0.39	0.57
Akt_pS473	1.41	0.16	0.31	-1.29	0.2	0.71	-1.23	0.22	0.39
Tuberin	1.42	0.16	0.31	0.25	0.8	0.99	0.15	0.88	0.94
YB-1	-1.4	0.16	0.32	0.36	0.72	0.96	0.75	0.45	0.64
DJ-1	1.38	0.17	0.32	0.73	0.46	0.94	0.04	0.97	0.99
PDK1_pS241	1.37	0.17	0.32	-0.14	0.89	0.99	-4.18	3.2e-05	0.00058
RBM15	1.37	0.17	0.32	0.01	1	1	1.34	0.18	0.35
c-Met_pY1235	-1.28	0.2	0.37	0.25	0.8	0.99	1.37	0.17	0.34
Chk2	1.29	0.2	0.37	-1.46	0.14	0.66	2.77	0.0057	0.034
SCD1	-1.29	0.2	0.37	-1.07	0.28	0.79	0.8	0.42	0.6
4E-BP1	1.25	0.21	0.38	0.43	0.67	0.96	-0.83	0.41	0.59
Src	-1.26	0.21	0.38	0.43	0.67	0.96	-1.32	0.19	0.35
ACVRL1_Caution	1.23	0.22	0.4	-1.25	0.21	0.71	-1	0.32	0.5
p21	-1.21	0.22	0.4	1.06	0.29	0.79	-3.35	0.00085	0.0091
Bax	1.17	0.24	0.42	2.71	0.0068	0.19	-9.28	1.3e-19	2.8e-17
FOXO3a_pS318_S321_Caution	1.19	0.24	0.41	0.37	0.71	0.96	-1.12	0.26	0.43
GSK3-alpha-beta_pS21_S9	1.19	0.24	0.41	0.36	0.72	0.96	-1.95	0.051	0.16
INPP4B	-1.18	0.24	0.41	-0.73	0.47	0.94	1.19	0.24	0.41
Porin	-1.15	0.25	0.43	0.45	0.65	0.96	1.33	0.19	0.35
c-Met_Caution	-1.13	0.26	0.43	-0.39	0.7	0.96	0.54	0.59	0.73
ETS-1	-1.14	0.26	0.43	-0.04	0.97	0.99	1.2	0.23	0.41
SETD2_Caution	1.08	0.28	0.47	-0.3	0.77	0.98	-0.57	0.57	0.72
beta Actin_Caution	1.07	0.29	0.48	-1.15	0.25	0.77	-1.86	0.063	0.18
Annexin_VII	1.03	0.3	0.49	0.36	0.72	0.96	-0.26	0.8	0.88
CDK1	-1.03	0.3	0.49	-1.64	0.1	0.66	-0.23	0.82	0.9
ERK2_Caution	1.04	0.3	0.49	-0.62	0.53	0.94	0.15	0.88	0.94
PRAS40_pT246	1.03	0.3	0.49	-0.68	0.5	0.94	0.73	0.46	0.64
MDMX_MDM4(BetIHC-00108)_Caution	-1.01	0.31	0.49	2.08	0.038	0.47	-6.87	1.2e-11	4.3e-10
SF2	1.02	0.31	0.49	0.94	0.35	0.86	-1.43	0.15	0.32
Transglutaminase	-1.02	0.31	0.49	0.11	0.92	0.99	-0.63	0.53	0.71
MYH11	0.99	0.32	0.5	-1.59	0.11	0.66	0.96	0.34	0.52
PEA15_pS116	-1	0.32	0.5	-0.15	0.88	0.99	0.95	0.34	0.52
p90RSK_pT573_Caution	0.96	0.34	0.52	-1.46	0.15	0.66	-0.28	0.78	0.87
TTF1	0.95	0.34	0.52	1.86	0.063	0.58	-1.34	0.18	0.35
Bad_pS112	-0.93	0.35	0.53	0.21	0.83	0.99	1.44	0.15	0.32
JAK2	-0.91	0.36	0.54	0.09	0.93	0.99	-1.41	0.16	0.33
N-Ras	0.88	0.38	0.56	-0.38	0.7	0.96	-1.05	0.29	0.47
p90RSK_pT359_S363_Caution	-0.88	0.38	0.56	-0.86	0.39	0.89	0.26	0.79	0.88
Paxillin_Caution	-0.88	0.38	0.56	-1.34	0.18	0.69	1.5	0.13	0.31
C-Raf(BD610151)_Caution	0.85	0.4	0.58	1.4	0.16	0.68	-1.19	0.24	0.41
Di-Ras3_Caution	0.84	0.4	0.59	1.25	0.21	0.71	-2.17	0.031	0.11
Bcl-xL	-0.82	0.41	0.59	-0.09	0.93	0.99	0.4	0.69	0.82
NF2_Caution	-0.82	0.41	0.59	-3.98	7.5e-05	0.016	1.7	0.09	0.24
P-Cadherin_Caution	0.83	0.41	0.59	-1.85	0.065	0.58	-0.25	0.8	0.89
PDCD4_Caution	0.79	0.43	0.61	1.13	0.26	0.78	-1.47	0.14	0.31
PRDX1	-0.78	0.44	0.61	-0.02	0.98	1	-1.91	0.056	0.17
CD31	0.74	0.46	0.64	-0.93	0.35	0.86	0.32	0.75	0.87
GSK3_pS9	0.74	0.46	0.64	0.72	0.47	0.94	-1.52	0.13	0.31
C-Raf(MP05-739)	0.72	0.47	0.65	1.36	0.17	0.68	-0.02	0.98	0.99
C-Raf_pS338	0.72	0.47	0.65	-0.68	0.49	0.94	0.95	0.34	0.52
Akt	0.71	0.48	0.66	1.8	0.072	0.6	-2.48	0.013	0.063
STAT3_pY705	0.69	0.49	0.67	0.29	0.77	0.98	-0.05	0.96	0.98
Fibronectin	-0.66	0.51	0.69	-0.49	0.62	0.96	0.68	0.5	0.68
beta-Catenin_pT41_S45	-0.65	0.52	0.69	-0.01	0.99	1	1.17	0.24	0.41
Cyclin_B1	0.63	0.53	0.7	-1.19	0.23	0.75	5	6.9e-07	1.6e-05
Smac_Caution	0.63	0.53	0.7	0.54	0.59	0.96	-1.14	0.25	0.42
Rictor_Caution	0.61	0.54	0.71	1.04	0.3	0.8	1.17	0.24	0.41
HER3_pY1289_Caution	-0.55	0.58	0.76	1.7	0.09	0.65	0	1	1
PEA15	-0.53	0.59	0.77	-0.74	0.46	0.94	-2.07	0.039	0.13
Lck	-0.53	0.6	0.77	0.21	0.84	0.99	0.83	0.41	0.59
Tuberin_pT1462	0.52	0.6	0.77	0.34	0.73	0.96	-0.96	0.34	0.52
c-Jun_pS73	-0.51	0.61	0.77	1.37	0.17	0.68	-0.29	0.77	0.87
ER-alpha_pS118	-0.52	0.61	0.77	0.54	0.59	0.96	0.13	0.89	0.94
PR	0.51	0.61	0.77	1.03	0.3	0.8	0.94	0.35	0.53
CD20 _Caution	-0.5	0.62	0.77	0.49	0.63	0.96	0.01	0.99	1
AMPK_alpha_Caution	0.48	0.63	0.78	-0.58	0.56	0.96	-0.57	0.57	0.72
ATM	0.48	0.63	0.78	-0.89	0.37	0.89	1.82	0.069	0.19
ASNS	-0.45	0.65	0.8	0.12	0.91	0.99	0.57	0.57	0.72
Bak_Caution	0.45	0.65	0.8	0.32	0.75	0.97	2.02	0.044	0.14
TFRC	-0.46	0.65	0.8	-0.08	0.93	0.99	2.05	0.04	0.13
Src_pY416_Caution	-0.44	0.66	0.8	0.74	0.46	0.94	2.12	0.035	0.12
4E-BP1_pT70	0.43	0.67	0.8	-0.16	0.87	0.99	-1.24	0.22	0.39
ERCC1_Caution	-0.41	0.68	0.82	-0.01	0.99	1	1.43	0.15	0.32
ADAR1	0.38	0.71	0.84	1.28	0.2	0.71	-1.56	0.12	0.29
Beclin_Caution	0.35	0.73	0.86	0.66	0.51	0.94	-2.61	0.0093	0.051
Raptor	-0.35	0.73	0.86	-0.6	0.55	0.95	1.16	0.24	0.41
mTOR	0.32	0.75	0.88	-0.84	0.4	0.89	3.06	0.0023	0.018
eIF4E	-0.3	0.76	0.88	1.57	0.12	0.66	-1.51	0.13	0.31
Mre11_Caution	-0.31	0.76	0.88	-0.18	0.85	0.99	0.24	0.81	0.89
MAPK_pT202_Y204	0.29	0.77	0.89	-0.85	0.4	0.89	-0.29	0.78	0.87
mTOR_pS2448_Caution	0.27	0.79	0.9	-0.53	0.6	0.96	1.22	0.22	0.4
ACC_pS79	-0.26	0.8	0.9	-0.64	0.52	0.94	2.48	0.013	0.063
Chk2_pT68_Caution	0.25	0.8	0.9	-2.67	0.0078	0.19	7.82	1.5e-14	1.3e-12
Collagen_VI	-0.26	0.8	0.9	0.13	0.9	0.99	-1.3	0.19	0.36
PREX1	-0.26	0.8	0.9	-0.04	0.97	0.99	-2.47	0.014	0.063
MDM2_pS166	-0.24	0.81	0.9	0.62	0.54	0.94	-3.41	0.00069	0.0081
p38_MAPK	0.22	0.82	0.91	0.58	0.56	0.96	-0.37	0.71	0.84
E-Cadherin	-0.21	0.83	0.92	-0.65	0.52	0.94	0.79	0.43	0.6
p27_pT198	-0.2	0.84	0.92	-0.06	0.95	0.99	-0.16	0.88	0.94
A-Raf_pS299_Caution	-0.19	0.85	0.93	-1.56	0.12	0.66	-0.49	0.63	0.77
Rad50	-0.13	0.89	0.96	-0.62	0.53	0.94	1.49	0.14	0.31
TSC1_Caution	-0.14	0.89	0.96	-0.57	0.57	0.96	-0.28	0.78	0.87
ACC1_Caution	-0.13	0.9	0.96	-1.63	0.1	0.66	2.72	0.0067	0.039
NDRG1_pT346	-0.13	0.9	0.96	-0.81	0.42	0.92	0.66	0.51	0.69
PI3K-p85	-0.1	0.92	0.97	0.39	0.7	0.96	-2.52	0.012	0.061
Rab25	-0.1	0.92	0.97	-0.35	0.73	0.96	1.02	0.31	0.49
Src_pY527	-0.1	0.92	0.97	1.01	0.31	0.81	0.11	0.92	0.95
14-3-3_zeta	0.08	0.93	0.97	0.29	0.77	0.98	-0.72	0.47	0.65
Rictor_pT1135	-0.09	0.93	0.97	-0.47	0.64	0.96	0.39	0.7	0.83
STAT5-alpha	0.06	0.95	0.98	1.12	0.26	0.78	-0.11	0.92	0.95
cIAP_Caution	0.05	0.96	0.98	-1.19	0.24	0.75	-1.48	0.14	0.31
GATA3	-0.05	0.96	0.98	1.51	0.13	0.66	-1.89	0.058	0.17
p38 alpha MAPK	-0.05	0.96	0.98	-0.15	0.88	0.99	-0.93	0.35	0.53
AMPK_pT172	-0.02	0.98	0.99	1.11	0.27	0.78	2.27	0.023	0.093
beta-Catenin	-0.03	0.98	0.99	-0.17	0.87	0.99	1.41	0.16	0.33
Snail_Caution	0.02	0.99	1	-0.52	0.6	0.96	0.58	0.56	0.72
PARP_cleaved_Caution	-0.01	1	1	-0.16	0.88	0.99	1.12	0.26	0.43
RAD51	0	1	1	-1.22	0.22	0.73	2.5	0.013	0.063

## Sheet: S5
Table S5. Differential CRISPR dependency score analysis
gene	comutant_t	comutant_pv	comutant_padj	TP53_t	TP53_pv	TP53_padj	RB1_t	RB1_pv	RB1_padj
E2F3	-8.97	2.9e-18	5.3e-14	-4	7e-05	0.35	5.42	8.1e-08	0.00016
CCND1	8.87	6.8e-18	6.2e-14	3.12	0.0019	0.54	-3.54	0.00043	0.083
CDK6	7.4	4e-13	2.4e-09	1.53	0.13	0.89	-5.04	6.1e-07	0.00069
RBL1	7.22	1.4e-12	6.4e-09	1.73	0.085	0.85	-1.88	0.061	0.52
CDK4	6.5	1.6e-10	5.8e-07	3.15	0.0017	0.52	-3.1	0.002	0.18
CCNE2	-6.35	3.9e-10	1.1e-06	-0.19	0.85	0.99	4.42	1.1e-05	0.0067
LIN37	6.33	4.3e-10	1.1e-06	0.53	0.6	0.97	-3.22	0.0013	0.14
SKP2	-6.25	7.3e-10	1.7e-06	-1.67	0.096	0.86	4.88	1.3e-06	0.0012
CCNF	5.3	1.6e-07	0.00032	2.74	0.0062	0.64	-2	0.046	0.47
UBE2Q1	-5.19	2.7e-07	0.00046	-2.02	0.043	0.79	5.37	1.1e-07	0.00019
CKS1B	-5.19	2.8e-07	0.00046	-1.07	0.28	0.94	4.1	4.7e-05	0.018
TFDP1	-5.06	5.4e-07	0.00082	-2.12	0.035	0.77	3.64	0.00029	0.061
CDK2	-4.88	1.4e-06	0.0019	-2.39	0.017	0.72	2.61	0.0094	0.31
RB1	-4.85	1.5e-06	0.002	0.21	0.84	0.99	1.09	0.28	0.76
RBL2	4.6	5e-06	0.0061	1.35	0.18	0.91	-1.23	0.22	0.72
TADA2A	-4.5	7.9e-06	0.009	-1.34	0.18	0.91	2.72	0.0066	0.27
ORC6	-4.43	1.1e-05	0.011	0.19	0.85	0.99	1.02	0.31	0.78
PTGER2	4.16	3.6e-05	0.036	-2	0.046	0.8	-2.02	0.043	0.47
TCF19	-4.13	4.1e-05	0.039	0.72	0.47	0.96	2.05	0.041	0.46
RXRB	-4.09	4.8e-05	0.043	-0.43	0.67	0.97	1.43	0.15	0.65
CDKN2C	-4.05	5.8e-05	0.05	0.5	0.62	0.97	2.6	0.0096	0.31
CCND3	3.97	8e-05	0.061	1.71	0.088	0.85	-2.65	0.0082	0.29
FBXL12	3.97	8e-05	0.061	-1.42	0.16	0.9	-2.13	0.033	0.44
CHTF8	-3.96	8.1e-05	0.061	-0.92	0.36	0.95	1.45	0.15	0.65
ATP6V1G1	3.95	8.6e-05	0.062	0.17	0.87	0.99	-0.03	0.97	1
DYRK1A	-3.91	0.0001	0.071	-1.27	0.21	0.92	4.62	4.6e-06	0.0036
KLHDC3	3.89	0.00011	0.074	-0.06	0.95	1	-0.91	0.36	0.82
CCNE1	-3.86	0.00013	0.081	-2.42	0.016	0.71	1.05	0.29	0.77
MDM2	3.83	0.00014	0.086	-2.12	0.035	0.77	13.13	3e-35	5.4e-31
CCDC7	3.79	0.00016	0.094	0.7	0.48	0.96	-1.11	0.27	0.76
ORC1	-3.79	0.00016	0.094	0.02	0.98	1	1.15	0.25	0.75
PPM1D	3.78	0.00017	0.094	-0.96	0.34	0.94	7.93	8.8e-15	4e-11
RFTN2	-3.78	0.00017	0.094	1.31	0.19	0.92	2.41	0.016	0.37
COP1	3.76	0.00019	0.097	0.67	0.5	0.96	-0.17	0.87	0.98
HUWE1	3.76	0.00019	0.097	0.58	0.56	0.97	-0.17	0.86	0.98
RASL12	-3.69	0.00024	0.12	-0.84	0.4	0.95	1.51	0.13	0.63
PAGE4	3.68	0.00026	0.13	0.07	0.95	1	-1.94	0.053	0.5
NOP9	-3.66	0.00027	0.13	0.31	0.75	0.98	2.17	0.03	0.43
METTL5	-3.62	0.00032	0.14	0.86	0.39	0.95	-0.78	0.43	0.85
OR5AP2	3.62	0.00032	0.14	-0.63	0.53	0.96	-0.65	0.52	0.89
CCT8L2	3.61	0.00033	0.14	0.06	0.95	1	-1.73	0.085	0.56
SLC25A39	-3.6	0.00034	0.15	0.94	0.35	0.94	1.19	0.24	0.74
PKLR	3.52	0.00046	0.19	-1.27	0.21	0.92	-1.73	0.084	0.56
RHEB	3.5	0.00049	0.2	0.27	0.79	0.98	-1.71	0.087	0.56
ZFPL1	3.47	0.00056	0.23	-0.02	0.98	1	-3.35	0.00086	0.12
PPP2CA	3.44	0.00061	0.24	-0.57	0.57	0.97	-0.71	0.48	0.87
ERC1	-3.43	0.00064	0.24	0.21	0.83	0.99	1.46	0.15	0.65
EXTL3	3.43	0.00064	0.24	1.06	0.29	0.94	-2.55	0.011	0.32
USP7	3.42	0.00067	0.25	-0.82	0.41	0.95	4.18	3.3e-05	0.014
CLDN3	3.41	0.00068	0.25	1.03	0.3	0.94	-2.44	0.015	0.35
MPEG1	3.4	0.0007	0.25	0.21	0.84	0.99	-0.79	0.43	0.85
NFKBIZ	-3.4	0.0007	0.25	0.59	0.55	0.97	1.09	0.27	0.76
TUBA1A	3.39	0.00074	0.25	2.3	0.021	0.73	-3.43	0.00063	0.1
PRKCZ	-3.38	0.00075	0.25	0.44	0.66	0.97	0.43	0.66	0.93
PIN1	3.38	0.00076	0.25	-0.01	0.99	1	-0.23	0.82	0.97
ZMAT5	-3.35	0.00085	0.27	-1.13	0.26	0.93	1.26	0.21	0.72
IL12RB1	3.35	0.00086	0.27	-0.44	0.66	0.97	-1.89	0.059	0.51
TP53	-3.35	0.00086	0.27	0.63	0.53	0.96	-8.49	1.3e-16	7.8e-13
YEATS2	-3.31	0.00097	0.3	-3.51	0.00048	0.45	2.95	0.0033	0.21
SNTG2	3.3	0.001	0.31	0.5	0.62	0.97	-1.86	0.063	0.52
POM121	3.28	0.0011	0.32	0.36	0.72	0.98	0.42	0.68	0.94
B4GALNT2	3.26	0.0012	0.32	0.93	0.35	0.95	-1.62	0.11	0.59
CBWD2	3.25	0.0012	0.32	0.64	0.52	0.96	-0.48	0.63	0.92
CCDC85B	3.26	0.0012	0.32	-0.04	0.97	1	-2.41	0.016	0.37
KIF18B	3.24	0.0012	0.32	-0.35	0.73	0.98	3.04	0.0024	0.19
LSM10	-3.25	0.0012	0.32	-1.26	0.21	0.92	-0.19	0.85	0.97
MRAP2	-3.24	0.0012	0.32	1.05	0.3	0.94	1.07	0.28	0.77
NAV2	3.26	0.0012	0.32	-0.89	0.38	0.95	0.23	0.82	0.97
PRPF4B	3.26	0.0012	0.32	-1.58	0.12	0.88	-0.62	0.54	0.89
TANGO6	-3.25	0.0012	0.32	0.49	0.63	0.97	1.08	0.28	0.76
ZSCAN29	-3.24	0.0012	0.32	-0.92	0.36	0.95	-0.75	0.46	0.86
KIF20B	-3.22	0.0013	0.32	0.82	0.41	0.95	3.23	0.0013	0.14
MPP5	-3.24	0.0013	0.32	0.27	0.79	0.98	2.75	0.0062	0.27
UBXN11	3.23	0.0013	0.32	0.29	0.77	0.98	-1.99	0.047	0.48
FAM53C	3.22	0.0014	0.33	1.03	0.3	0.94	-4.11	4.5e-05	0.018
KCNH2	-3.19	0.0015	0.35	1.66	0.098	0.86	1.85	0.065	0.53
MAGEB16	3.19	0.0015	0.35	0.35	0.73	0.98	-2.27	0.024	0.41
OR5L2	3.19	0.0015	0.35	0.21	0.83	0.99	-1.56	0.12	0.61
AQP6	-3.17	0.0016	0.36	0.77	0.44	0.96	2.28	0.023	0.4
UBIAD1	3.18	0.0016	0.36	0.99	0.32	0.94	1.79	0.073	0.54
MSI2	3.15	0.0017	0.38	1.47	0.14	0.9	1.03	0.3	0.78
RREB1	-3.13	0.0018	0.39	-0.67	0.5	0.96	3.01	0.0027	0.2
TAF7	-3.13	0.0018	0.39	-0.71	0.48	0.96	1.55	0.12	0.61
CDKAL1	-3.11	0.0019	0.39	-2	0.046	0.8	3.06	0.0023	0.19
HENMT1	-3.11	0.0019	0.39	-0.36	0.72	0.98	2.62	0.009	0.3
NLRP10	-3.12	0.0019	0.39	-0.76	0.45	0.96	1.07	0.28	0.77
PTTG2	-3.12	0.0019	0.39	-0.15	0.88	0.99	1.96	0.05	0.49
RAPGEF1	3.12	0.0019	0.39	-0.19	0.85	0.99	-0.57	0.57	0.91
ZZZ3	-3.11	0.0019	0.39	-3.13	0.0018	0.54	4.47	9.3e-06	0.0056
CCT2	-3.11	0.002	0.39	-0.58	0.56	0.97	1.69	0.091	0.57
FKBP2	3.1	0.002	0.39	0.3	0.76	0.98	-1.89	0.059	0.51
SGO2	3.1	0.002	0.39	1.53	0.13	0.89	-0.67	0.5	0.88
TLDC2	3.11	0.002	0.39	-0.4	0.69	0.98	-2.92	0.0036	0.22
ARPC4	3.09	0.0021	0.39	-0.79	0.43	0.96	-0.78	0.44	0.86
CALN1	3.09	0.0021	0.39	0.26	0.79	0.98	-1.4	0.16	0.66
MSH6	-3.09	0.0021	0.39	-1.44	0.15	0.9	1.41	0.16	0.66
TEN1	-3.09	0.0021	0.39	0.05	0.96	1	-0.4	0.69	0.94
VEGFD	3.08	0.0021	0.4	-1.45	0.15	0.9	-0.6	0.55	0.9
ERP44	3.08	0.0022	0.4	0.74	0.46	0.96	-0.13	0.9	0.98
RPS6KA3	3.07	0.0022	0.4	0.24	0.81	0.99	-1.66	0.097	0.58
CBLL1	-3.06	0.0023	0.4	-0.33	0.74	0.98	0.03	0.98	1
ISOC1	-3.06	0.0023	0.4	0.1	0.92	0.99	1.88	0.06	0.51
MEIS2	3.06	0.0023	0.4	-0.26	0.8	0.98	-2.29	0.022	0.4
MRGPRD	3.06	0.0023	0.4	0.7	0.48	0.96	-2.07	0.039	0.46
PUS7	-3.07	0.0023	0.4	0.16	0.87	0.99	0.99	0.32	0.8
CHD1	3.05	0.0024	0.4	-0.56	0.57	0.97	-1.34	0.18	0.69
MAU2	3.05	0.0024	0.4	1.31	0.19	0.92	-2.75	0.0061	0.26
PUS10	-3.04	0.0024	0.4	0.13	0.9	0.99	1.7	0.091	0.57
SLC17A3	-3.04	0.0024	0.4	0.98	0.33	0.94	0.55	0.59	0.91
CCNB2	3.03	0.0025	0.41	-1.02	0.31	0.94	-0.56	0.57	0.91
FLT3LG	3.03	0.0025	0.41	-1.79	0.075	0.84	-0.35	0.72	0.95
OR4D10	3.04	0.0025	0.41	-0.63	0.53	0.96	0.87	0.39	0.83
BMP8A	-3.02	0.0026	0.41	1.01	0.31	0.94	1.23	0.22	0.73
CC2D1B	-3.02	0.0026	0.41	-0.43	0.66	0.97	-0.1	0.92	0.99
QKI	3.03	0.0026	0.41	-0.02	0.98	1	-0.72	0.47	0.87
CD33	3	0.0028	0.43	-0.58	0.56	0.97	-1.51	0.13	0.63
HOXC8	-3	0.0028	0.43	2.61	0.0093	0.69	0.04	0.97	0.99
TMOD1	3	0.0028	0.43	0.07	0.94	1	-1.1	0.27	0.76
ZNF850	3	0.0028	0.43	0.01	0.99	1	-0.67	0.5	0.88
NMU	-2.99	0.0029	0.43	-0.16	0.88	0.99	2.3	0.022	0.4
SLC16A7	2.98	0.0029	0.43	0.89	0.37	0.95	-0.9	0.37	0.82
VBP1	2.99	0.0029	0.43	1.9	0.058	0.82	-0.28	0.78	0.96
CST6	2.98	0.003	0.43	0.51	0.61	0.97	-1.97	0.049	0.48
PLA2G4F	-2.97	0.003	0.44	-0.59	0.56	0.97	0.22	0.82	0.97
B3GALT6	2.97	0.0031	0.44	-0.9	0.37	0.95	-1.53	0.13	0.62
CDT1	-2.97	0.0031	0.44	0.04	0.97	1	1.57	0.12	0.61
POU2F3	-2.97	0.0031	0.44	-0.8	0.42	0.95	1.67	0.096	0.58
ACSF2	2.96	0.0032	0.45	-0.02	0.98	1	-3.01	0.0027	0.2
BAG6	-2.96	0.0032	0.45	1.49	0.14	0.89	-0.4	0.69	0.94
EIF4H	2.96	0.0032	0.45	-0.96	0.34	0.94	-0.91	0.36	0.82
GTF2H2	-2.96	0.0032	0.45	-1.2	0.23	0.93	-0.08	0.94	0.99
PI3	2.94	0.0033	0.46	0.57	0.57	0.97	-1.47	0.14	0.64
ZNF681	-2.95	0.0033	0.46	-0.04	0.97	1	0.75	0.45	0.86
MARCH3	-2.94	0.0034	0.46	-0.6	0.55	0.97	0.7	0.48	0.88
BRAP	2.93	0.0035	0.46	0.81	0.42	0.95	4.31	1.9e-05	0.0094
EIF3L	2.93	0.0035	0.46	0.8	0.42	0.95	-2.82	0.005	0.25
MBLAC1	2.93	0.0035	0.46	-1.17	0.24	0.93	-0.78	0.44	0.85
SLC25A47	-2.93	0.0035	0.46	0.04	0.96	1	0.91	0.36	0.82
BTBD1	2.92	0.0036	0.46	-0.14	0.89	0.99	-0.52	0.61	0.92
CDKN2A	2.93	0.0036	0.46	0.15	0.88	0.99	-3.43	0.00065	0.11
HMGCR	2.92	0.0036	0.46	-0.61	0.54	0.96	1.92	0.055	0.5
ZNF43	2.92	0.0036	0.46	-1.92	0.055	0.82	-1.44	0.15	0.65
CD247	-2.92	0.0037	0.46	-1.42	0.16	0.9	-0.13	0.9	0.98
FCN1	2.91	0.0037	0.46	-1.61	0.11	0.88	-1.59	0.11	0.6
KLHDC7A	-2.92	0.0037	0.46	0.76	0.45	0.96	-0.71	0.48	0.87
NRK	2.91	0.0037	0.46	0.77	0.44	0.96	-0.66	0.51	0.88
PPP2R1A	2.91	0.0037	0.46	0.03	0.97	1	-0.36	0.72	0.94
PDRG1	-2.9	0.0038	0.46	-0.82	0.41	0.95	1.19	0.23	0.74
C16orf72	2.9	0.0039	0.46	1.32	0.19	0.91	2.76	0.0059	0.26
DAPL1	-2.9	0.0039	0.46	-0.14	0.89	0.99	2.34	0.02	0.38
EFNB2	-2.89	0.0039	0.46	-1.8	0.072	0.83	1.67	0.096	0.58
PIP5K1C	-2.9	0.0039	0.46	-1.5	0.13	0.89	-1.04	0.3	0.78
SSX7	2.9	0.0039	0.46	-0.09	0.93	1	-1.15	0.25	0.75
SMPDL3B	2.88	0.004	0.47	-0.23	0.82	0.99	-1.73	0.083	0.56
FAM117A	2.88	0.0041	0.47	0.37	0.71	0.98	-1.03	0.31	0.78
PPP2R2A	2.88	0.0041	0.47	0.8	0.42	0.95	2.35	0.019	0.38
SLC39A7	2.88	0.0041	0.47	0.2	0.84	0.99	-0.37	0.71	0.94
SULT1C3	-2.88	0.0041	0.47	-1.52	0.13	0.89	2.39	0.017	0.37
FAM83A	2.87	0.0042	0.47	0.04	0.97	1	-2.4	0.017	0.37
GAGE10	2.87	0.0042	0.47	1.09	0.27	0.94	-1.75	0.081	0.55
HLA-DQA1	2.87	0.0042	0.47	-0.9	0.37	0.95	0.05	0.96	0.99
LRRC8A	2.87	0.0042	0.47	1.39	0.17	0.91	-2.08	0.038	0.46
OR5W2	2.87	0.0042	0.47	0.52	0.6	0.97	-1.08	0.28	0.77
UNKL	2.87	0.0042	0.47	-0.16	0.87	0.99	-1.82	0.07	0.53
DET1	2.86	0.0043	0.47	1.86	0.063	0.82	-0.99	0.32	0.8
NDRG4	-2.86	0.0043	0.47	0.23	0.82	0.99	1.25	0.21	0.72
PRKCQ	2.86	0.0043	0.47	-0.02	0.99	1	-1.84	0.067	0.53
CFB	-2.85	0.0045	0.48	0.06	0.95	1	0.27	0.78	0.96
FCN2	2.85	0.0045	0.48	-1.38	0.17	0.91	-0.97	0.33	0.8
KRTDAP	2.85	0.0045	0.48	2.46	0.014	0.71	-3.32	0.00096	0.13
NFATC4	-2.84	0.0046	0.48	-1.05	0.29	0.94	0.21	0.84	0.97
VPS4B	-2.84	0.0046	0.48	-0.19	0.85	0.99	0.34	0.73	0.95
CHTF18	-2.83	0.0047	0.49	-0.62	0.54	0.96	2.35	0.019	0.38
PPP4R1	-2.83	0.0047	0.49	0.88	0.38	0.95	2.19	0.029	0.43
EFNA4	-2.83	0.0048	0.49	-1.56	0.12	0.88	1.91	0.057	0.51
GAB1	2.83	0.0048	0.49	0.17	0.86	0.99	-2.43	0.015	0.36
GPR65	2.83	0.0048	0.49	-0.47	0.64	0.97	-0.06	0.95	0.99
PRPSAP1	2.83	0.0048	0.49	-0.57	0.57	0.97	-0.12	0.9	0.99
CACNG1	2.82	0.0049	0.49	-0.26	0.79	0.98	-1.92	0.055	0.51
ZBTB48	2.82	0.0049	0.49	0.39	0.7	0.98	-2.82	0.005	0.25
C19orf81	2.81	0.005	0.49	0.34	0.74	0.98	-2.21	0.027	0.42
SCG5	-2.82	0.005	0.49	-1.65	0.1	0.86	2.83	0.0047	0.24
SMG9	2.82	0.005	0.49	0.09	0.93	1	-2.48	0.014	0.34
TXNL4B	-2.82	0.005	0.49	-0.52	0.61	0.97	0.27	0.79	0.96
GBA2	2.81	0.0051	0.49	1.4	0.16	0.91	-0.97	0.33	0.8
CCS	2.8	0.0052	0.49	0.34	0.73	0.98	-0.59	0.56	0.9
CSH2	2.8	0.0052	0.49	-0.37	0.71	0.98	0.15	0.88	0.98
DYNLL1	2.81	0.0052	0.49	-0.32	0.75	0.98	-2.47	0.014	0.34
OOSP2	2.8	0.0052	0.49	-1.99	0.047	0.8	-2.18	0.03	0.43
TGOLN2	2.8	0.0052	0.49	-1.01	0.31	0.94	-1.54	0.12	0.62
AIFM2	-2.8	0.0053	0.49	0.13	0.9	0.99	0.15	0.88	0.98
AQP12B	2.8	0.0053	0.49	0.01	0.99	1	-1.43	0.15	0.66
MDM4	2.8	0.0053	0.49	-1.61	0.11	0.88	8.63	4.4e-17	4e-13
MYRIP	-2.79	0.0053	0.49	-0.24	0.81	0.99	1.04	0.3	0.78
ZNF367	-2.8	0.0053	0.49	-0.18	0.86	0.99	0.98	0.33	0.8
C11orf88	-2.79	0.0054	0.49	0.26	0.8	0.99	1.79	0.073	0.54
CHRDL2	-2.79	0.0054	0.49	0.75	0.46	0.96	-1.36	0.17	0.68
FBLN5	-2.79	0.0054	0.49	2.12	0.034	0.77	-1.16	0.25	0.74
SH3GL1	-2.79	0.0054	0.49	-0.14	0.89	0.99	0.2	0.84	0.97
DDX31	2.79	0.0055	0.49	-0.27	0.79	0.98	5.7	1.8e-08	4.7e-05
GALNT17	2.79	0.0055	0.49	-0.09	0.93	0.99	-0.02	0.99	1
PIK3R5	-2.78	0.0056	0.5	-0.4	0.69	0.98	-0.03	0.97	1
RPL36	2.78	0.0056	0.5	-0.71	0.48	0.96	1.18	0.24	0.74
HPSE	-2.78	0.0057	0.5	2.7	0.0071	0.65	0.06	0.95	0.99
ITCH	-2.77	0.0057	0.5	-0.32	0.75	0.98	-0.04	0.97	0.99
WDR77	2.77	0.0057	0.5	-0.07	0.94	1	-1.75	0.081	0.55
NUP188	2.77	0.0058	0.5	-0.95	0.34	0.94	-2.69	0.0073	0.29
PTK2	2.77	0.0058	0.5	0.65	0.51	0.96	0.8	0.42	0.85
TSPAN8	-2.76	0.006	0.52	1.87	0.062	0.82	1.54	0.12	0.61
FOSL1	2.75	0.0061	0.52	0.55	0.58	0.97	-1.79	0.074	0.54
OCRL	2.75	0.0061	0.52	-0.82	0.41	0.95	-1.87	0.062	0.52
TEDC2	2.75	0.0061	0.52	0.6	0.55	0.97	-0.1	0.92	0.99
ADRM1	2.75	0.0062	0.52	0.54	0.59	0.97	3.88	0.00011	0.033
FAM120A	2.75	0.0062	0.52	0.98	0.33	0.94	-3.13	0.0018	0.17
NR1H2	2.74	0.0063	0.53	0.22	0.83	0.99	-1.17	0.24	0.74
WIZ	2.74	0.0063	0.53	0	1	1	-0.64	0.52	0.89
GTF2H2C	-2.73	0.0064	0.53	-1.92	0.055	0.82	-0.37	0.71	0.94
HOOK3	2.73	0.0065	0.53	0.19	0.85	0.99	-1.33	0.18	0.69
HPSE2	2.73	0.0065	0.53	1.59	0.11	0.88	-2.63	0.0087	0.3
UPK1A	2.73	0.0065	0.53	-0.53	0.6	0.97	-1.03	0.3	0.78
KIF2C	2.72	0.0066	0.53	0.31	0.76	0.98	1.51	0.13	0.63
MICU3	2.72	0.0066	0.53	-0.98	0.33	0.94	0.62	0.54	0.89
SIGLEC12	2.72	0.0066	0.53	-1.92	0.055	0.82	-0.98	0.33	0.8
GLI4	2.72	0.0067	0.53	0.42	0.68	0.98	-0.78	0.44	0.85
KIF13B	2.72	0.0067	0.53	-0.76	0.45	0.96	0.37	0.72	0.94
MT1HL1	2.72	0.0067	0.53	-0.82	0.41	0.95	1.1	0.27	0.76
SLC4A8	-2.72	0.0067	0.53	3.47	0.00055	0.45	-0.09	0.93	0.99
STK32B	2.72	0.0067	0.53	-1.6	0.11	0.88	-0.73	0.46	0.87
ZCRB1	-2.72	0.0067	0.53	0.3	0.76	0.98	0.26	0.79	0.96
CDCA3	2.71	0.0068	0.53	1.07	0.28	0.94	-1.35	0.18	0.68
MAX	2.71	0.0068	0.53	-0.25	0.8	0.99	-2.99	0.0029	0.21
SNCA	-2.71	0.0068	0.53	-0.17	0.87	0.99	1.75	0.081	0.55
KRTAP3-2	2.71	0.007	0.54	-1.84	0.067	0.82	-1.94	0.052	0.5
MROH2B	2.71	0.007	0.54	-1.03	0.31	0.94	0.79	0.43	0.85
NKRF	-2.7	0.007	0.54	-0.1	0.92	0.99	0.67	0.5	0.88
PFN1	2.7	0.007	0.54	1.19	0.23	0.93	-2.65	0.0083	0.29
GPC2	2.7	0.0071	0.54	-0.5	0.62	0.97	-1.14	0.26	0.75
RPL18A	2.7	0.0071	0.54	-1.17	0.24	0.93	1.76	0.078	0.55
SLC44A4	-2.7	0.0072	0.54	-0.45	0.65	0.97	0.47	0.64	0.93
ZBTB16	-2.69	0.0072	0.54	0.34	0.74	0.98	0.25	0.8	0.97
RGS5	-2.69	0.0073	0.55	0.75	0.45	0.96	2.46	0.014	0.35
C1orf185	-2.69	0.0074	0.55	-2.06	0.04	0.78	1.16	0.24	0.74
COMMD8	2.69	0.0074	0.55	1.58	0.11	0.88	0.1	0.92	0.99
ERBB2	2.69	0.0074	0.55	0.04	0.97	1	-2.64	0.0084	0.29
RNF141	-2.69	0.0074	0.55	-2.42	0.016	0.71	2.27	0.023	0.4
CENPK	-2.68	0.0075	0.55	-0.34	0.73	0.98	1.06	0.29	0.77
TMEM235	2.68	0.0075	0.55	-0.94	0.35	0.95	-1.97	0.05	0.49
MTRNR2L3	2.68	0.0076	0.55	-0.18	0.86	0.99	-0.69	0.49	0.88
NSL1	-2.68	0.0076	0.55	0.24	0.81	0.99	0.45	0.65	0.93
SHISA5	-2.68	0.0076	0.55	2.2	0.028	0.77	-1.06	0.29	0.77
EDEM3	-2.68	0.0077	0.55	0.33	0.74	0.98	2.14	0.033	0.44
NIPBL	2.67	0.0077	0.55	1.26	0.21	0.92	-0.97	0.33	0.8
PRSS3	2.67	0.0077	0.55	0.37	0.71	0.98	-1.02	0.31	0.78
GEMIN6	-2.67	0.0078	0.55	-0.73	0.46	0.96	-1.08	0.28	0.76
NCAPG2	2.67	0.0078	0.55	-1.39	0.17	0.91	0.63	0.53	0.89
H2AFX	-2.66	0.0079	0.55	0.86	0.39	0.95	3.22	0.0013	0.14
LRP2BP	-2.66	0.0079	0.55	1.16	0.25	0.93	1.34	0.18	0.69
BARX1	2.66	0.008	0.55	0.91	0.36	0.95	-2.3	0.022	0.4
DSCC1	-2.66	0.008	0.55	-1.41	0.16	0.9	2.59	0.0097	0.31
KIF27	2.66	0.008	0.55	0.33	0.74	0.98	-1.72	0.087	0.56
KRR1	-2.66	0.008	0.55	-0.87	0.39	0.95	1.9	0.058	0.51
TIFA	2.66	0.008	0.55	0.1	0.92	0.99	-1.91	0.057	0.51
TRIM31	-2.66	0.008	0.55	0.2	0.84	0.99	0.39	0.7	0.94
AGTR1	-2.65	0.0081	0.55	-0.86	0.39	0.95	1.74	0.082	0.55
RAC1	2.65	0.0081	0.55	-0.28	0.78	0.98	0.84	0.4	0.83
TRABD	2.65	0.0081	0.55	2.54	0.011	0.69	-0.5	0.62	0.92
FAM3B	2.65	0.0082	0.55	-0.95	0.34	0.94	-1.99	0.047	0.48
LYSMD4	2.65	0.0082	0.55	-0.1	0.92	0.99	-1.73	0.084	0.56
SFXN4	2.65	0.0082	0.55	0.86	0.39	0.95	-1.4	0.16	0.67
SLC24A5	-2.65	0.0082	0.55	-0.82	0.41	0.95	0.06	0.95	0.99
TBCD	-2.65	0.0082	0.55	-0.91	0.36	0.95	-0.07	0.94	0.99
THUMPD2	2.65	0.0082	0.55	0.22	0.82	0.99	-0.01	0.99	1
XRN1	-2.65	0.0082	0.55	-0.07	0.95	1	-0.16	0.87	0.98
CDC14B	2.65	0.0083	0.55	0.78	0.43	0.96	-0.36	0.72	0.94
ERBB3	2.65	0.0083	0.55	-0.2	0.84	0.99	-1.32	0.19	0.7
SLC25A45	2.65	0.0083	0.55	-0.27	0.78	0.98	-2	0.046	0.47
DIMT1	-2.64	0.0084	0.55	-0.99	0.32	0.94	1.92	0.055	0.51
MAP3K7	-2.64	0.0084	0.55	-0.56	0.57	0.97	0.32	0.75	0.95
MRM1	-2.64	0.0084	0.55	-0.95	0.34	0.94	1.33	0.18	0.69
BAZ1B	2.64	0.0086	0.55	-0.11	0.91	0.99	0.83	0.4	0.84
CHRDL1	2.64	0.0086	0.55	0.89	0.37	0.95	-1.57	0.12	0.61
ZNF574	2.63	0.0086	0.55	-1.03	0.3	0.94	1.01	0.31	0.79
CNBP	2.63	0.0087	0.55	-0.76	0.44	0.96	-2.3	0.021	0.39
PCSK1	-2.63	0.0087	0.55	1.47	0.14	0.9	0.87	0.39	0.83
PLEKHO1	-2.63	0.0087	0.55	1.15	0.25	0.93	0.12	0.91	0.99
SH2D4B	2.63	0.0088	0.56	0.24	0.81	0.99	-2.94	0.0034	0.21
SLC4A11	-2.63	0.0088	0.55	-1.36	0.17	0.91	1.1	0.27	0.76
UTP4	-2.63	0.0088	0.56	1.25	0.21	0.92	-0.03	0.98	1
E2F1	-2.62	0.0091	0.57	-1.71	0.087	0.85	3.65	0.00029	0.06
UBE2C	2.62	0.0091	0.57	-0.02	0.98	1	-0.86	0.39	0.83
CX3CR1	2.61	0.0092	0.57	1.23	0.22	0.93	-2.59	0.0097	0.31
SPRED3	2.61	0.0092	0.57	-0.49	0.63	0.97	-1.41	0.16	0.66
NSUN5	2.61	0.0093	0.57	-0.57	0.57	0.97	1.35	0.18	0.68
KHDC3L	-2.61	0.0094	0.57	-0.09	0.93	1	0.53	0.6	0.92
MCTP2	2.6	0.0094	0.57	-1.18	0.24	0.93	-2.17	0.03	0.43
TMCO3	-2.6	0.0094	0.57	-0.99	0.32	0.94	2.38	0.018	0.37
IFITM10	-2.6	0.0095	0.57	-0.01	0.99	1	2.53	0.012	0.32
KLK10	2.6	0.0095	0.57	-2.91	0.0038	0.59	-0.16	0.87	0.98
PSORS1C2	-2.6	0.0095	0.57	2.38	0.017	0.72	-0.29	0.77	0.96
RPAIN	2.6	0.0095	0.57	-0.45	0.65	0.97	-1.66	0.098	0.58
CRIPT	2.6	0.0096	0.57	-0.17	0.87	0.99	-0.07	0.94	0.99
INO80B	-2.6	0.0096	0.57	0.72	0.47	0.96	3	0.0028	0.21
C12orf57	-2.59	0.0097	0.57	0	1	1	0.87	0.38	0.83
CCDC32	-2.59	0.0097	0.57	0.33	0.74	0.98	1.14	0.25	0.75
CEP72	-2.59	0.0097	0.57	-1.48	0.14	0.9	0.98	0.33	0.8
JOSD2	2.59	0.0097	0.57	0.09	0.93	0.99	-1.02	0.31	0.78
LRRC42	-2.6	0.0097	0.57	-2.37	0.018	0.72	-0.07	0.94	0.99
STX2	-2.59	0.0097	0.57	0.33	0.74	0.98	0.74	0.46	0.87
PPP2CB	2.59	0.0098	0.57	-1.17	0.24	0.93	-0.22	0.82	0.97
C6orf118	-2.59	0.0099	0.57	-0.19	0.85	0.99	2.54	0.011	0.32
CLSTN2	-2.59	0.0099	0.57	-0.07	0.94	1	1.06	0.29	0.77
OR1S2	2.59	0.0099	0.57	-0.69	0.49	0.96	0.21	0.83	0.97
SPANXN3	2.59	0.0099	0.57	-0.31	0.75	0.98	-0.96	0.34	0.8
ZFP36L1	2.59	0.0099	0.57	-0.46	0.64	0.97	0.56	0.58	0.91
BAP1	2.57	0.01	0.58	-1.18	0.24	0.93	0.2	0.84	0.97
CAPSL	-2.57	0.01	0.58	0.85	0.39	0.95	0.65	0.51	0.89
CHST7	2.58	0.01	0.58	-2.29	0.023	0.73	-1.76	0.079	0.55
HMX2	-2.58	0.01	0.58	0.34	0.73	0.98	1.24	0.22	0.72
PNPT1	-2.57	0.01	0.58	3.01	0.0027	0.55	-1.76	0.079	0.55
POC5	2.57	0.01	0.58	0.97	0.33	0.94	-0.25	0.81	0.97
SERHL2	-2.58	0.01	0.58	1.05	0.29	0.94	0.47	0.64	0.93
TUBA1C	2.58	0.01	0.58	0.45	0.65	0.97	-0.82	0.41	0.84
VTCN1	-2.57	0.01	0.58	1.52	0.13	0.89	0.86	0.39	0.83
WWOX	2.57	0.01	0.58	-0.69	0.49	0.96	-1.25	0.21	0.72
ZCWPW1	2.57	0.01	0.58	-0.15	0.88	0.99	-0.79	0.43	0.85
ZER1	2.57	0.01	0.58	-0.33	0.74	0.98	0.56	0.57	0.91
ADNP	2.54	0.011	0.6	-1.11	0.27	0.93	1.36	0.18	0.68
ARFGEF1	2.55	0.011	0.59	-1.89	0.06	0.82	-0.58	0.56	0.9
ATM	-2.55	0.011	0.59	-0.39	0.7	0.98	-4.22	2.7e-05	0.012
CIZ1	2.55	0.011	0.59	-0.07	0.95	1	-2.51	0.012	0.33
CMA1	-2.54	0.011	0.6	0.24	0.81	0.99	1.31	0.19	0.7
DMD	2.56	0.011	0.58	0.66	0.51	0.96	-2.02	0.044	0.47
DNAJC7	-2.54	0.011	0.6	-0.54	0.59	0.97	2.6	0.0095	0.31
GLB1L2	2.56	0.011	0.59	-0.89	0.37	0.95	-1.98	0.048	0.48
GUCY2D	-2.55	0.011	0.59	-1.26	0.21	0.92	0.07	0.94	0.99
IBSP	-2.56	0.011	0.58	0.59	0.56	0.97	1.63	0.1	0.59
KDM7A	2.56	0.011	0.59	2.26	0.024	0.74	-2.96	0.0032	0.21
KRT73	-2.56	0.011	0.58	2.41	0.016	0.72	0.63	0.53	0.89
LRRC8C	-2.56	0.011	0.58	1.34	0.18	0.91	0.55	0.58	0.91
NDUFS7	2.54	0.011	0.6	1.15	0.25	0.93	-1.63	0.1	0.59
PAK4	2.54	0.011	0.6	1.2	0.23	0.93	0.09	0.93	0.99
TEX45	2.54	0.011	0.6	-0.13	0.9	0.99	-3.41	0.00068	0.11
UBE2L3	2.54	0.011	0.6	0.99	0.32	0.94	-1.26	0.21	0.71
UROC1	-2.56	0.011	0.58	1.07	0.28	0.94	1.8	0.072	0.54
VPS37D	2.55	0.011	0.59	-0.38	0.71	0.98	-1.74	0.083	0.55
APP	-2.53	0.012	0.6	1.2	0.23	0.93	2.25	0.025	0.41
CEMIP2	2.51	0.012	0.6	1.69	0.092	0.86	-1.69	0.091	0.57
CLCNKB	2.52	0.012	0.6	-1.67	0.095	0.86	-0.93	0.35	0.81
DUSP10	2.52	0.012	0.6	-1.34	0.18	0.91	0.44	0.66	0.93
EGFL8	-2.52	0.012	0.6	-0.25	0.81	0.99	-0.45	0.66	0.93
FNTA	2.52	0.012	0.6	0.52	0.6	0.97	1.24	0.22	0.72
FOXG1	-2.51	0.012	0.6	0.31	0.76	0.98	0.88	0.38	0.82
G2E3	-2.52	0.012	0.6	0.8	0.42	0.95	2.17	0.03	0.43
GNA11	2.53	0.012	0.6	1.71	0.087	0.85	-1.92	0.055	0.51
GOLGA1	2.52	0.012	0.6	-0.35	0.72	0.98	-2.96	0.0032	0.21
IGFLR1	2.51	0.012	0.6	0.36	0.72	0.98	-0.85	0.4	0.83
NPR3	-2.52	0.012	0.6	-0.66	0.51	0.96	0.84	0.4	0.84
NUPR2	2.53	0.012	0.6	0.7	0.48	0.96	-0.71	0.48	0.87
OR10C1	-2.52	0.012	0.6	-0.55	0.58	0.97	0.29	0.77	0.96
OR52A1	2.53	0.012	0.6	-0.43	0.67	0.97	-0.77	0.44	0.86
OR8H2	2.53	0.012	0.6	-0.84	0.4	0.95	0.92	0.36	0.81
PAK1IP1	2.52	0.012	0.6	0.66	0.51	0.96	0.33	0.74	0.95
PCDHGC5	2.53	0.012	0.6	-1.22	0.22	0.93	-0.55	0.58	0.91
PCLAF	-2.51	0.012	0.6	-0.87	0.38	0.95	1.64	0.1	0.59
PPM1J	-2.51	0.012	0.6	0.42	0.67	0.97	-0.09	0.93	0.99
RBM12B	-2.53	0.012	0.6	-2.02	0.043	0.79	1.24	0.21	0.72
SPOCD1	-2.52	0.012	0.6	-0.18	0.86	0.99	-0.45	0.65	0.93
TBX15	-2.51	0.012	0.6	1.24	0.22	0.93	1.1	0.27	0.76
TJP3	2.51	0.012	0.6	1.86	0.063	0.82	-3.03	0.0025	0.2
TUBAL3	2.52	0.012	0.6	-0.97	0.33	0.94	-2.13	0.034	0.44
USF1	2.53	0.012	0.6	1.21	0.22	0.93	-1.18	0.24	0.74
WTAP	-2.53	0.012	0.6	-0.2	0.84	0.99	-0.39	0.7	0.94
ZNF479	2.52	0.012	0.6	-0.46	0.65	0.97	-0.38	0.7	0.94
AGPAT1	-2.5	0.013	0.61	-0.38	0.7	0.98	0.56	0.58	0.91
ANKRD18A	2.48	0.013	0.62	0.24	0.81	0.99	0.01	0.99	1
CNTN2	-2.48	0.013	0.62	-0.93	0.35	0.95	1.07	0.28	0.77
GNG3	2.48	0.013	0.62	-0.2	0.84	0.99	-2.24	0.026	0.41
KCNH7	-2.5	0.013	0.61	0.9	0.37	0.95	1.3	0.19	0.7
MYOC	-2.5	0.013	0.61	-0.1	0.92	0.99	-0.31	0.75	0.95
NCOA3	2.49	0.013	0.62	-0.29	0.77	0.98	0.14	0.89	0.98
NKAIN4	2.49	0.013	0.62	0.44	0.66	0.97	-2.32	0.021	0.39
NRGN	2.5	0.013	0.61	-0.56	0.58	0.97	-1.35	0.18	0.68
OAZ3	-2.48	0.013	0.62	-1.97	0.049	0.8	0.62	0.53	0.89
PCDH15	2.49	0.013	0.62	2.27	0.024	0.73	-2.39	0.017	0.37
RSPH10B2	2.48	0.013	0.62	0.25	0.8	0.99	0.21	0.84	0.97
SLC22A12	2.5	0.013	0.61	0.39	0.69	0.98	-2.25	0.025	0.41
TICRR	-2.49	0.013	0.62	0.02	0.98	1	1.17	0.24	0.74
ZNF683	2.49	0.013	0.62	0.87	0.39	0.95	-3.07	0.0022	0.19
ATP8B2	-2.47	0.014	0.62	1.02	0.31	0.94	0.46	0.65	0.93
BRAF	2.46	0.014	0.62	-1.63	0.1	0.87	0.93	0.35	0.81
C5orf30	-2.46	0.014	0.62	-0.79	0.43	0.96	0.69	0.49	0.88
CHST12	2.47	0.014	0.62	0.67	0.5	0.96	-1.88	0.061	0.52
CPM	-2.47	0.014	0.62	0.4	0.69	0.98	4.5	8.1e-06	0.0052
CYB5R2	-2.47	0.014	0.62	-2.07	0.039	0.78	1.58	0.12	0.61
DAO	-2.46	0.014	0.62	-0.48	0.63	0.97	-0.1	0.92	0.99
DNAJB8	-2.46	0.014	0.62	-0.57	0.57	0.97	-0.23	0.81	0.97
FBP2	-2.47	0.014	0.62	1.33	0.18	0.91	-0.47	0.64	0.93
FDXR	-2.45	0.014	0.63	1.35	0.18	0.91	-3.69	0.00025	0.055
HINT3	2.47	0.014	0.62	-3.45	0.0006	0.45	-1.59	0.11	0.6
KLHL26	2.46	0.014	0.62	1.3	0.19	0.92	-2.67	0.0078	0.29
MAP3K11	2.48	0.014	0.62	0.95	0.34	0.94	-2.64	0.0084	0.29
MITF	2.46	0.014	0.62	0.9	0.37	0.95	1.23	0.22	0.73
MOB2	-2.47	0.014	0.62	1.71	0.087	0.85	-0.07	0.95	0.99
MTNR1B	-2.46	0.014	0.62	0.56	0.57	0.97	1.92	0.055	0.5
MYH10	-2.46	0.014	0.62	0.08	0.93	1	0.09	0.93	0.99
NLGN1	-2.46	0.014	0.62	1.56	0.12	0.88	1.15	0.25	0.75
NR2F2	2.46	0.014	0.62	3.07	0.0022	0.54	-2.19	0.029	0.43
PFDN4	2.45	0.014	0.63	1.06	0.29	0.94	-0.45	0.65	0.93
PHETA1	2.45	0.014	0.63	0.36	0.72	0.98	-2.93	0.0035	0.22
PJA2	-2.47	0.014	0.62	1.42	0.16	0.9	-0.14	0.89	0.98
PRR29	2.46	0.014	0.62	-2.57	0.01	0.69	-1.68	0.094	0.57
RPL22	-2.47	0.014	0.62	2.11	0.035	0.78	-3.68	0.00025	0.055
RPL35	2.46	0.014	0.62	-0.36	0.72	0.98	0.57	0.57	0.91
TEPSIN	2.47	0.014	0.62	0.14	0.89	0.99	-2.52	0.012	0.33
TPD52L1	-2.47	0.014	0.62	-2.9	0.0038	0.59	2.46	0.014	0.35
TPTE	2.47	0.014	0.62	-1.61	0.11	0.88	-0.4	0.69	0.94
ZKSCAN5	2.47	0.014	0.62	0.49	0.62	0.97	-0.5	0.62	0.92
ZNF239	2.46	0.014	0.62	0.96	0.34	0.94	-0.03	0.98	1
ZNF821	-2.46	0.014	0.62	-0.59	0.55	0.97	-0.13	0.89	0.98
ALOXE3	-2.43	0.015	0.63	-1.13	0.26	0.93	-0.87	0.38	0.83
C1QL2	2.43	0.015	0.63	0.18	0.86	0.99	-1.88	0.061	0.51
C8orf76	2.43	0.015	0.63	0.78	0.43	0.96	-1.81	0.071	0.54
COX6A1	-2.43	0.015	0.63	1.54	0.12	0.88	-0.78	0.43	0.85
ERMN	-2.44	0.015	0.63	1.08	0.28	0.94	1.12	0.26	0.76
FAXC	-2.44	0.015	0.63	-0.98	0.33	0.94	1.37	0.17	0.68
HS6ST3	-2.45	0.015	0.63	0.89	0.37	0.95	0.27	0.79	0.96
IQCF3	2.43	0.015	0.63	-0.43	0.67	0.97	-1.75	0.081	0.55
KLHL23	-2.43	0.015	0.63	-0.37	0.71	0.98	1.82	0.069	0.53
LENEP	-2.43	0.015	0.63	1.98	0.048	0.8	0.53	0.6	0.92
POM121L2	-2.44	0.015	0.63	0.24	0.81	0.99	1.44	0.15	0.65
PRMT5	2.43	0.015	0.63	1.5	0.14	0.89	-2.75	0.0061	0.26
ROCK2	-2.45	0.015	0.63	-0.06	0.95	1	0.63	0.53	0.89
SERPINA4	-2.43	0.015	0.63	1.76	0.078	0.84	-0.47	0.64	0.93
SI	-2.44	0.015	0.63	-0.03	0.97	1	1.1	0.27	0.76
STT3B	2.43	0.015	0.63	-2.08	0.038	0.78	-0.45	0.66	0.93
TLK1	-2.43	0.015	0.63	-0.18	0.86	0.99	0.96	0.34	0.8
UBE2N	-2.43	0.015	0.63	-0.64	0.52	0.96	-0.7	0.49	0.88
WFDC8	2.43	0.015	0.63	0.29	0.77	0.98	-1.85	0.065	0.53
ZDHHC23	-2.43	0.015	0.63	0.7	0.48	0.96	1.63	0.1	0.59
ZFAND2A	2.44	0.015	0.63	0.3	0.76	0.98	-1.35	0.18	0.68
ZFYVE16	-2.44	0.015	0.63	-0.61	0.54	0.97	1.51	0.13	0.63
ATMIN	2.42	0.016	0.64	1.09	0.28	0.94	-1.91	0.056	0.51
LGI3	-2.42	0.016	0.63	2.3	0.022	0.73	0.53	0.6	0.92
MYC	2.42	0.016	0.64	0.33	0.74	0.98	-1.39	0.16	0.67
NFU1	2.41	0.016	0.64	1.86	0.063	0.82	-0.55	0.58	0.91
PCDHB15	2.41	0.016	0.64	0.65	0.52	0.96	-2.91	0.0037	0.22
PHB	-2.43	0.016	0.63	-0.17	0.86	0.99	0.73	0.46	0.87
PHYKPL	2.41	0.016	0.64	-0.11	0.91	0.99	-1.6	0.11	0.6
POM121L12	2.4	0.016	0.64	-0.37	0.71	0.98	-1.83	0.067	0.53
PTTG1IP	2.42	0.016	0.64	-1.16	0.25	0.93	-0.82	0.41	0.84
SAP30L	2.42	0.016	0.63	0.13	0.89	0.99	-1.69	0.092	0.57
SMG8	2.42	0.016	0.64	-1.73	0.084	0.85	-0.99	0.32	0.79
SMLR1	-2.41	0.016	0.64	-0.84	0.4	0.95	0.11	0.92	0.99
SNX4	-2.41	0.016	0.64	0.5	0.62	0.97	1.96	0.05	0.49
TAF15	2.42	0.016	0.63	-0.65	0.52	0.96	0.23	0.82	0.97
TMX1	-2.42	0.016	0.63	1.89	0.059	0.82	2.86	0.0044	0.24
UGT1A10	-2.41	0.016	0.64	-0.23	0.82	0.99	1.1	0.27	0.76
UTP15	-2.42	0.016	0.64	0.17	0.86	0.99	3.19	0.0015	0.16
ZNF420	2.41	0.016	0.64	0.25	0.8	0.99	-0.54	0.59	0.91
ACTG1	2.38	0.017	0.65	1.33	0.18	0.91	-1.87	0.062	0.52
AKIRIN1	2.38	0.017	0.65	1.9	0.058	0.82	-1.77	0.078	0.55
ATP10A	-2.4	0.017	0.64	-0.63	0.53	0.96	0.87	0.38	0.83
CAMKV	2.4	0.017	0.64	0.71	0.48	0.96	-1.46	0.14	0.64
CBX2	2.39	0.017	0.64	0.24	0.81	0.99	-1.32	0.19	0.7
CCDC39	-2.39	0.017	0.65	0.53	0.59	0.97	-1.05	0.29	0.77
CPZ	2.39	0.017	0.64	-0.39	0.7	0.98	-1.39	0.17	0.67
CYP2A6	2.4	0.017	0.64	-1.15	0.25	0.93	-1.06	0.29	0.77
DDX59	-2.4	0.017	0.64	0.11	0.92	0.99	0.58	0.56	0.9
EFS	-2.4	0.017	0.64	0.49	0.63	0.97	1.25	0.21	0.72
GATB	-2.38	0.017	0.65	1.65	0.099	0.86	-0.53	0.6	0.92
GSTO2	-2.4	0.017	0.64	-1.02	0.31	0.94	1.69	0.091	0.57
IL17D	2.39	0.017	0.64	-0.33	0.74	0.98	0.99	0.32	0.79
LSM1	2.4	0.017	0.64	0.59	0.56	0.97	0.75	0.45	0.86
LSM11	-2.4	0.017	0.64	-1.23	0.22	0.93	-0.87	0.39	0.83
MIF4GD	2.39	0.017	0.64	0.25	0.8	0.99	-2.26	0.024	0.41
NACA	2.4	0.017	0.64	-1.21	0.23	0.93	2.05	0.041	0.46
NELFCD	-2.39	0.017	0.65	-0.05	0.96	1	0.54	0.59	0.91
PHC3	-2.4	0.017	0.64	1.01	0.31	0.94	0.52	0.6	0.92
PSMG1	2.4	0.017	0.64	-0.08	0.93	1	0.42	0.67	0.93
PXMP2	2.4	0.017	0.64	-1.57	0.12	0.88	0.55	0.58	0.91
RIOK1	2.39	0.017	0.64	-0.95	0.34	0.94	1.41	0.16	0.66
RXRG	-2.39	0.017	0.65	-1.16	0.25	0.93	1.21	0.22	0.73
S1PR2	2.39	0.017	0.64	2.17	0.03	0.77	-1.53	0.13	0.62
TNFRSF19	2.38	0.017	0.65	-1.6	0.11	0.88	-2.03	0.043	0.47
TNS3	2.39	0.017	0.65	0.34	0.73	0.98	0.18	0.86	0.98
WDHD1	-2.4	0.017	0.64	1.78	0.075	0.84	0.09	0.92	0.99
WWC2	-2.39	0.017	0.64	2.59	0.0099	0.69	-2.52	0.012	0.32
XKR3	2.39	0.017	0.64	0.52	0.61	0.97	0.84	0.4	0.83
ZFYVE26	-2.4	0.017	0.64	-0.45	0.65	0.97	0.51	0.61	0.92
ATPAF2	-2.37	0.018	0.65	1.46	0.14	0.9	0.23	0.82	0.97
CFAP73	2.37	0.018	0.65	-2.57	0.01	0.69	-1.51	0.13	0.63
CIDEC	2.37	0.018	0.65	0.16	0.87	0.99	-0.72	0.47	0.87
CSNK2A2	-2.37	0.018	0.65	-0.49	0.63	0.97	-1.59	0.11	0.6
DCAF4L2	2.38	0.018	0.65	-0.72	0.47	0.96	-0.62	0.53	0.89
DEFB126	-2.38	0.018	0.65	0.09	0.92	0.99	3.04	0.0024	0.19
GMFG	-2.38	0.018	0.65	1.46	0.14	0.9	0.69	0.49	0.88
KIAA0319	-2.38	0.018	0.65	0.25	0.8	0.99	0.47	0.64	0.93
LY6G6F	-2.38	0.018	0.65	0.97	0.33	0.94	-0.69	0.49	0.88
SDHC	-2.37	0.018	0.65	0.22	0.83	0.99	0.54	0.59	0.92
SLC12A6	-2.36	0.018	0.66	1.54	0.12	0.88	0.97	0.33	0.8
SPATA5	2.36	0.018	0.66	0.81	0.42	0.95	-0.69	0.49	0.88
TAF1D	2.38	0.018	0.65	-0.66	0.51	0.96	2.74	0.0063	0.27
TAF6L	2.37	0.018	0.65	-0.84	0.4	0.95	-1.6	0.11	0.6
TMEM144	-2.37	0.018	0.65	1.95	0.052	0.81	3.09	0.0021	0.19
UBE2H	2.38	0.018	0.65	-0.48	0.63	0.97	-0.37	0.71	0.94
VPREB1	2.37	0.018	0.65	-1.23	0.22	0.93	-2.37	0.018	0.38
ZNF557	2.37	0.018	0.65	-1.42	0.16	0.9	-0.42	0.67	0.93
BCAN	-2.35	0.019	0.66	-0.46	0.65	0.97	1.28	0.2	0.71
C11orf53	-2.35	0.019	0.66	1.41	0.16	0.9	0.46	0.65	0.93
CDC6	-2.36	0.019	0.66	-0.11	0.91	0.99	1.83	0.067	0.53
DDX43	-2.35	0.019	0.66	-0.66	0.51	0.96	0.47	0.64	0.93
DHX9	-2.35	0.019	0.66	-0.84	0.4	0.95	-0.56	0.57	0.91
EXOSC6	-2.36	0.019	0.66	0.16	0.88	0.99	0.54	0.59	0.91
HIVEP1	-2.36	0.019	0.66	1.05	0.3	0.94	0.07	0.94	0.99
IMP4	-2.34	0.019	0.67	-0.96	0.34	0.94	0.1	0.92	0.99
JPT2	2.35	0.019	0.66	1.15	0.25	0.93	-0.46	0.65	0.93
NELFB	-2.35	0.019	0.66	0.43	0.67	0.97	-0.62	0.53	0.89
NEUROG1	2.35	0.019	0.66	-1.14	0.26	0.93	-1.72	0.086	0.56
OR5M3	2.36	0.019	0.66	-2.02	0.044	0.79	-0.58	0.56	0.9
PPP1R37	2.34	0.019	0.67	0.43	0.66	0.97	-1.49	0.14	0.63
RNF152	-2.36	0.019	0.66	0.82	0.41	0.95	2.37	0.018	0.37
RRP12	-2.36	0.019	0.66	0.23	0.82	0.99	1.18	0.24	0.74
SCML4	-2.35	0.019	0.66	-0.68	0.5	0.96	-0.66	0.51	0.88
SERPINA1	-2.36	0.019	0.66	-0.97	0.33	0.94	0.61	0.54	0.89
SLC39A3	2.34	0.019	0.66	-0.1	0.92	0.99	-0.18	0.86	0.98
SLC9A6	2.35	0.019	0.66	-0.02	0.99	1	-1.64	0.1	0.59
STX19	2.36	0.019	0.66	-0.93	0.35	0.95	0.21	0.84	0.97
TMEM134	2.34	0.019	0.67	-0.48	0.63	0.97	-1.29	0.2	0.7
USP35	-2.36	0.019	0.66	-0.17	0.87	0.99	2.84	0.0047	0.24
ZNF571	2.34	0.019	0.66	0.61	0.54	0.97	0.37	0.71	0.94
ADPRH	-2.34	0.02	0.67	-0.58	0.56	0.97	0.16	0.88	0.98
AHSP	2.33	0.02	0.67	-0.06	0.95	1	0.6	0.55	0.9
BMP5	-2.33	0.02	0.67	-1.57	0.12	0.88	-1.22	0.22	0.73
C3orf36	-2.33	0.02	0.67	-0.02	0.98	1	1.1	0.27	0.76
DNM1	2.32	0.02	0.67	1.48	0.14	0.9	-1.69	0.091	0.57
DRG1	2.33	0.02	0.67	-0.47	0.64	0.97	-0.64	0.52	0.89
DUSP21	2.34	0.02	0.67	-1.5	0.13	0.89	-0.24	0.81	0.97
EFTUD2	-2.33	0.02	0.67	-1.33	0.19	0.91	0.56	0.58	0.91
FAM19A1	2.33	0.02	0.67	0.54	0.59	0.97	-1.39	0.16	0.67
ITGAV	2.33	0.02	0.67	0.4	0.69	0.98	1.21	0.23	0.73
MAD2L2	-2.32	0.02	0.67	-0.08	0.94	1	-1.76	0.078	0.55
MPIG6B	-2.33	0.02	0.67	0.96	0.34	0.94	-0.73	0.47	0.87
OR8K5	2.33	0.02	0.67	0.59	0.56	0.97	0.12	0.91	0.99
PIK3C2A	-2.33	0.02	0.67	-0.44	0.66	0.97	2.38	0.017	0.37
POTEF	2.33	0.02	0.67	1.37	0.17	0.91	-1.29	0.2	0.7
RNF111	2.34	0.02	0.67	0.09	0.93	1	-2.15	0.032	0.44
TEAD1	2.33	0.02	0.67	-0.07	0.94	1	0.69	0.49	0.88
TNNT1	-2.32	0.02	0.67	0.5	0.61	0.97	0.28	0.78	0.96
TSHZ2	2.34	0.02	0.67	-0.55	0.58	0.97	-1.98	0.048	0.48
BCAP31	2.32	0.021	0.67	-0.85	0.4	0.95	-0.33	0.74	0.95
BMI1	-2.32	0.021	0.67	-0.92	0.36	0.95	1.43	0.15	0.66
C1QTNF5	-2.32	0.021	0.67	-0.96	0.34	0.94	2.4	0.017	0.37
CCL26	2.32	0.021	0.67	-0.43	0.67	0.97	-0.07	0.95	0.99
CEP85	2.31	0.021	0.68	0.12	0.9	0.99	-0.45	0.65	0.93
CLDN1	-2.31	0.021	0.67	0.19	0.85	0.99	0.67	0.5	0.88
CSTF1	-2.31	0.021	0.67	0.68	0.49	0.96	0.48	0.63	0.92
CTSH	2.32	0.021	0.67	-0.44	0.66	0.97	-0.98	0.32	0.8
HIST1H2BI	2.31	0.021	0.67	0.99	0.32	0.94	-1	0.32	0.79
LNX2	-2.31	0.021	0.67	0.01	0.99	1	2.68	0.0075	0.29
MAGEC1	2.31	0.021	0.67	-0.54	0.59	0.97	-0.23	0.82	0.97
MAPK1IP1L	-2.31	0.021	0.67	-1.19	0.24	0.93	1.51	0.13	0.63
MUC21	-2.32	0.021	0.67	-0.02	0.98	1	1.39	0.17	0.67
ODAPH	-2.32	0.021	0.67	0.52	0.61	0.97	1.09	0.28	0.76
P2RY1	-2.32	0.021	0.67	-0.36	0.72	0.98	0.64	0.52	0.89
PLA2G16	2.32	0.021	0.67	0.58	0.56	0.97	-2.19	0.029	0.43
PRLR	-2.32	0.021	0.67	0.6	0.55	0.97	1.64	0.1	0.58
PZP	-2.31	0.021	0.67	0.53	0.59	0.97	0.82	0.41	0.84
RBFOX1	-2.31	0.021	0.67	0.42	0.68	0.98	-0.05	0.96	0.99
RCN3	2.31	0.021	0.67	1.09	0.28	0.94	-2.01	0.044	0.47
RPS2	-2.32	0.021	0.67	-0.47	0.64	0.97	2.06	0.04	0.46
SAMHD1	2.31	0.021	0.67	-0.6	0.55	0.97	-0.75	0.45	0.86
SPINK4	2.31	0.021	0.67	0.07	0.94	1	-0.34	0.74	0.95
TBRG1	2.31	0.021	0.67	1.86	0.063	0.82	-0.82	0.41	0.84
TIGAR	2.31	0.021	0.67	1.08	0.28	0.94	-2.09	0.037	0.45
TOMM40L	2.32	0.021	0.67	-0.98	0.33	0.94	-0.32	0.75	0.95
A4GNT	-2.3	0.022	0.68	-0.98	0.33	0.94	1.16	0.25	0.74
ANKRD44	-2.3	0.022	0.68	0.19	0.85	0.99	0.84	0.4	0.84
C1QTNF3	-2.3	0.022	0.68	-1	0.32	0.94	1.57	0.12	0.61
CCT8	2.3	0.022	0.68	-1.18	0.24	0.93	-1.22	0.22	0.73
DKK4	2.3	0.022	0.68	1.12	0.26	0.93	-0.31	0.76	0.95
GPX6	-2.29	0.022	0.68	0.43	0.67	0.97	0.57	0.57	0.91
IFI30	2.29	0.022	0.68	0.19	0.85	0.99	-1.07	0.29	0.77
ISYNA1	2.29	0.022	0.68	0.41	0.68	0.98	-1.36	0.17	0.68
LGALS7	2.29	0.022	0.68	-0.13	0.89	0.99	-0.6	0.55	0.9
MAMSTR	2.3	0.022	0.68	-0.93	0.35	0.95	0.3	0.77	0.96
NAE1	-2.3	0.022	0.68	-0.65	0.52	0.96	-0.43	0.67	0.93
NGLY1	-2.29	0.022	0.68	1.39	0.16	0.91	1.16	0.25	0.74
PANK4	-2.3	0.022	0.68	1.4	0.16	0.9	0.55	0.58	0.91
SBDS	2.3	0.022	0.68	0.39	0.7	0.98	0.17	0.86	0.98
SOX4	-2.29	0.022	0.68	-1.21	0.23	0.93	1.82	0.069	0.53
TMEM248	2.3	0.022	0.68	0.38	0.7	0.98	-0.53	0.6	0.92
TPPP	-2.3	0.022	0.68	0.99	0.32	0.94	1.94	0.053	0.5
TSPAN14	-2.29	0.022	0.68	0.94	0.35	0.94	0.72	0.47	0.87
TXLNG	2.3	0.022	0.68	-1.19	0.24	0.93	-0.21	0.83	0.97
VENTX	-2.29	0.022	0.68	-0.19	0.85	0.99	2.42	0.016	0.36
ZNF514	2.29	0.022	0.68	0.62	0.53	0.96	-0.61	0.54	0.89
CAND1	2.28	0.023	0.69	0.67	0.5	0.96	-1.56	0.12	0.61
FAM57A	2.28	0.023	0.69	-0.64	0.52	0.96	0.06	0.95	0.99
FOXN2	-2.28	0.023	0.69	-0.91	0.36	0.95	2.89	0.0039	0.23
FUCA1	2.28	0.023	0.69	1.16	0.25	0.93	-2.14	0.033	0.44
GINS1	-2.28	0.023	0.69	0.39	0.7	0.98	0.45	0.65	0.93
IGFBP1	2.28	0.023	0.69	1.47	0.14	0.9	-1.27	0.2	0.71
IQCH	2.28	0.023	0.69	0.3	0.76	0.98	0.77	0.44	0.86
LLGL2	2.27	0.023	0.69	1.47	0.14	0.9	-2.12	0.034	0.45
MRPL19	-2.29	0.023	0.68	2.65	0.0083	0.68	0.69	0.49	0.88
NOL12	2.27	0.023	0.69	0.04	0.96	1	0.03	0.97	1
RBFOX3	2.27	0.023	0.69	-0.49	0.62	0.97	-1.01	0.31	0.79
RPL10	2.28	0.023	0.69	-0.72	0.47	0.96	-1.97	0.05	0.49
SPRY4	-2.28	0.023	0.69	0.62	0.53	0.96	0.6	0.55	0.9
TNF	-2.28	0.023	0.69	1.04	0.3	0.94	1.2	0.23	0.73
VMAC	-2.27	0.023	0.69	-0.8	0.42	0.95	0.77	0.44	0.86
ZNF100	2.27	0.023	0.69	0.02	0.99	1	-0.21	0.83	0.97
AAED1	2.26	0.024	0.69	0.79	0.43	0.96	-0.62	0.53	0.89
AP2M1	-2.26	0.024	0.69	-0.3	0.77	0.98	0.61	0.55	0.9
AQP11	2.27	0.024	0.69	0.2	0.84	0.99	-1.01	0.31	0.79
ARHGEF33	-2.26	0.024	0.69	-0.4	0.69	0.98	0.95	0.34	0.8
BRWD3	2.26	0.024	0.69	-1.49	0.14	0.89	1.05	0.29	0.77
CDCA8	2.27	0.024	0.69	1.42	0.16	0.9	-1.44	0.15	0.65
CFL2	-2.26	0.024	0.69	0.02	0.98	1	0.97	0.33	0.8
ENDOG	2.25	0.024	0.69	1.14	0.25	0.93	-3.06	0.0023	0.19
GRK7	-2.26	0.024	0.69	-0.37	0.71	0.98	-0.32	0.75	0.95
HINT2	2.26	0.024	0.69	0.79	0.43	0.96	-1.01	0.31	0.79
KLF10	2.27	0.024	0.69	0.31	0.76	0.98	-0.76	0.45	0.86
MEI4	-2.27	0.024	0.69	0.04	0.97	1	0.5	0.62	0.92
NECAB1	2.26	0.024	0.69	-0.11	0.91	0.99	-2.24	0.026	0.41
PDZK1	-2.26	0.024	0.69	0.66	0.51	0.96	2.26	0.024	0.41
PKDREJ	2.26	0.024	0.69	0.17	0.87	0.99	-2.2	0.028	0.42
RP1	2.26	0.024	0.69	-0.18	0.85	0.99	-0.57	0.57	0.9
S1PR3	2.27	0.024	0.69	0.79	0.43	0.96	-1.86	0.063	0.52
SLC1A4	2.26	0.024	0.69	-0.48	0.63	0.97	0.74	0.46	0.87
STAU1	2.26	0.024	0.69	-1.76	0.079	0.84	0.47	0.64	0.93
STN1	-2.26	0.024	0.69	0.79	0.43	0.96	-1.1	0.27	0.76
TADA2B	2.27	0.024	0.69	-0.39	0.7	0.98	-2.67	0.0078	0.29
TRIM15	2.25	0.024	0.69	0.16	0.87	0.99	-0.57	0.57	0.91
UBE2QL1	-2.26	0.024	0.69	-0.33	0.74	0.98	1.62	0.11	0.59
USH2A	-2.26	0.024	0.69	0.04	0.97	1	2.31	0.021	0.39
ZIC2	-2.26	0.024	0.69	1.12	0.26	0.93	-0.33	0.74	0.95
ZNF233	2.27	0.024	0.69	2.07	0.038	0.78	-0.84	0.4	0.83
CHERP	2.25	0.025	0.7	-1.45	0.15	0.9	-0.31	0.76	0.95
CTSW	2.25	0.025	0.7	1.1	0.27	0.93	-1.38	0.17	0.67
DOHH	-2.24	0.025	0.7	0.45	0.65	0.97	-1.46	0.14	0.64
EIF4EBP3	2.25	0.025	0.7	-2.29	0.022	0.73	-1.95	0.051	0.49
FCGRT	2.24	0.025	0.7	-1.2	0.23	0.93	-3.32	0.00094	0.13
GINS2	-2.24	0.025	0.7	-0.4	0.69	0.98	0.14	0.89	0.98
GTF2H3	-2.25	0.025	0.7	0.92	0.36	0.95	-0.1	0.92	0.99
HSD17B2	-2.24	0.025	0.7	-1.95	0.051	0.81	-0.61	0.54	0.89
MASTL	-2.25	0.025	0.7	1.11	0.27	0.93	-0.39	0.7	0.94
OTOL1	-2.25	0.025	0.7	0.83	0.41	0.95	1.67	0.096	0.58
PTRH1	2.25	0.025	0.7	0.53	0.59	0.97	-0.9	0.37	0.82
RBM7	-2.24	0.025	0.7	1.37	0.17	0.91	2.52	0.012	0.32
RPA2	2.25	0.025	0.69	0.44	0.66	0.97	1.08	0.28	0.77
STAMBPL1	2.24	0.025	0.7	0.16	0.87	0.99	-3.2	0.0014	0.15
TEX30	-2.25	0.025	0.7	0.1	0.92	0.99	1.08	0.28	0.77
USP17L5	2.25	0.025	0.7	0.62	0.54	0.96	2.31	0.021	0.39
APOC3	-2.22	0.026	0.71	-0.64	0.52	0.96	0.31	0.76	0.95
ARHGAP28	-2.23	0.026	0.71	0.15	0.88	0.99	1.07	0.28	0.77
C12orf71	-2.24	0.026	0.7	-0.66	0.51	0.96	1.62	0.11	0.59
CCDC153	-2.23	0.026	0.71	0.03	0.98	1	1.08	0.28	0.77
CCDC71	2.23	0.026	0.71	-1.13	0.26	0.93	-0.54	0.59	0.91
FAM83B	-2.23	0.026	0.71	0.72	0.47	0.96	1.42	0.16	0.66
FMO3	-2.24	0.026	0.7	-1.85	0.064	0.82	1.94	0.053	0.5
ISCU	-2.24	0.026	0.7	1.06	0.29	0.94	-0.98	0.33	0.8
KMT2B	2.23	0.026	0.71	-0.63	0.53	0.96	-1.37	0.17	0.67
L3MBTL3	-2.24	0.026	0.7	-0.6	0.55	0.97	2.98	0.003	0.21
MYH14	2.23	0.026	0.71	-1.28	0.2	0.92	-1.2	0.23	0.73
NTF3	2.24	0.026	0.7	-0.44	0.66	0.97	-1.4	0.16	0.66
ORC4	-2.23	0.026	0.71	-0.68	0.5	0.96	0.37	0.71	0.94
SCRN3	-2.24	0.026	0.7	0.07	0.94	1	1.24	0.21	0.72
SNAI1	2.24	0.026	0.7	0	1	1	-0.81	0.42	0.85
SULT1C2	2.24	0.026	0.7	0.97	0.33	0.94	0.77	0.44	0.86
TIMM10	-2.24	0.026	0.7	0.63	0.53	0.96	-0.12	0.91	0.99
TUBB3	2.23	0.026	0.71	1.09	0.27	0.94	-0.49	0.62	0.92
CLDN5	2.21	0.027	0.71	-1.73	0.084	0.85	-0.22	0.83	0.97
CNTN4	2.21	0.027	0.71	-0.33	0.74	0.98	-0.84	0.4	0.84
CSNK1D	2.22	0.027	0.71	0.51	0.61	0.97	-0.67	0.51	0.88
EED	-2.21	0.027	0.71	0.91	0.36	0.95	0.23	0.82	0.97
ELF3	2.21	0.027	0.71	-0.79	0.43	0.96	-1.29	0.2	0.7
ERCC2	-2.21	0.027	0.71	-0.56	0.57	0.97	-1.86	0.063	0.52
HEPH	2.21	0.027	0.71	-1.27	0.2	0.92	-0.35	0.72	0.95
IFNL3	2.22	0.027	0.71	-0.91	0.36	0.95	-0.72	0.47	0.87
KBTBD7	2.21	0.027	0.71	-1.12	0.26	0.93	-0.6	0.55	0.9
KIAA0100	2.22	0.027	0.71	0.17	0.87	0.99	-0.17	0.87	0.98
KRT19	2.22	0.027	0.71	-0.44	0.66	0.97	-0.54	0.59	0.91
LIN52	2.22	0.027	0.71	0.54	0.59	0.97	-1.45	0.15	0.65
MAP4K3	-2.22	0.027	0.71	0.15	0.88	0.99	0.45	0.65	0.93
MKS1	2.22	0.027	0.71	-1.26	0.21	0.92	-1.93	0.055	0.5
MYB	-2.22	0.027	0.71	-0.42	0.68	0.98	0.83	0.41	0.84
NMT1	-2.21	0.027	0.71	0.84	0.4	0.95	-1.6	0.11	0.6
NQO2	-2.22	0.027	0.71	-0.4	0.69	0.98	-0.56	0.57	0.91
OR10W1	2.22	0.027	0.71	0.38	0.7	0.98	-0.05	0.96	0.99
OR4A16	2.22	0.027	0.71	1.13	0.26	0.93	-1.21	0.23	0.73
PIK3R2	2.22	0.027	0.71	-1.43	0.15	0.9	-0.17	0.87	0.98
PRPF4	2.22	0.027	0.71	-0.47	0.64	0.97	-0.82	0.41	0.84
TOM1L1	2.22	0.027	0.71	-1.82	0.069	0.82	0.87	0.39	0.83
TRAIP	-2.21	0.027	0.71	0.69	0.49	0.96	0.32	0.75	0.95
VEPH1	-2.22	0.027	0.71	-0.63	0.53	0.96	1.5	0.13	0.63
YIPF1	-2.21	0.027	0.71	-0.81	0.42	0.95	0.74	0.46	0.87
ZNF267	-2.21	0.027	0.71	0.23	0.82	0.99	0.1	0.92	0.99
AP3S1	2.2	0.028	0.71	-1.61	0.11	0.88	-1.54	0.12	0.62
BBOF1	2.2	0.028	0.71	0.18	0.86	0.99	-1.9	0.058	0.51
CMTM8	2.2	0.028	0.71	0.13	0.9	0.99	-1.55	0.12	0.61
CUZD1	-2.2	0.028	0.71	1.31	0.19	0.92	1.19	0.24	0.74
DNAJC21	2.21	0.028	0.71	0.71	0.48	0.96	1.23	0.22	0.72
EVI2B	-2.21	0.028	0.71	0.36	0.72	0.98	-0.25	0.8	0.97
EZR	-2.2	0.028	0.71	-0.5	0.62	0.97	1.04	0.3	0.78
GUSB	2.21	0.028	0.71	0.08	0.94	1	0.22	0.82	0.97
ITFG1	2.2	0.028	0.71	0	1	1	-0.64	0.53	0.89
KLHL2	-2.2	0.028	0.71	0.18	0.85	0.99	2.35	0.019	0.38
LBHD1	2.2	0.028	0.71	0.19	0.85	0.99	-2.53	0.012	0.32
NCAPD2	-2.2	0.028	0.71	0.31	0.76	0.98	0.26	0.8	0.97
NCBP2	-2.21	0.028	0.71	0.4	0.69	0.98	-1.13	0.26	0.75
PIGU	2.2	0.028	0.71	-0.35	0.73	0.98	-0.08	0.94	0.99
PLAC9	-2.21	0.028	0.71	2.13	0.033	0.77	0.92	0.36	0.81
RTL8B	2.21	0.028	0.71	0.03	0.98	1	0.51	0.61	0.92
SIPA1	2.2	0.028	0.71	0.77	0.44	0.96	-3.16	0.0016	0.17
SLC7A4	2.21	0.028	0.71	1.05	0.29	0.94	-2.82	0.0049	0.25
STX17	2.2	0.028	0.71	-0.91	0.36	0.95	-0.31	0.76	0.95
TAF8	-2.21	0.028	0.71	-1.2	0.23	0.93	2.78	0.0056	0.26
TANC1	-2.2	0.028	0.71	0.94	0.35	0.95	0.21	0.83	0.97
TCEAL1	-2.2	0.028	0.71	-1.29	0.2	0.92	2.19	0.029	0.43
TENT5D	2.2	0.028	0.71	-0.25	0.8	0.99	-2.04	0.042	0.46
ZNF622	2.2	0.028	0.71	-0.88	0.38	0.95	1.61	0.11	0.6
ACOT11	-2.19	0.029	0.72	0.55	0.58	0.97	0.54	0.59	0.91
C19orf53	2.18	0.029	0.72	1.11	0.27	0.93	1.44	0.15	0.65
CACNB2	2.18	0.029	0.72	1.35	0.18	0.91	-2.52	0.012	0.33
CCDC137	2.19	0.029	0.72	-1.13	0.26	0.93	-0.73	0.47	0.87
CEP131	2.18	0.029	0.72	-0.15	0.88	0.99	-1.72	0.086	0.56
CLNS1A	-2.18	0.029	0.72	0.3	0.77	0.98	1.94	0.053	0.5
EDN3	2.18	0.029	0.72	1.58	0.12	0.88	-0.96	0.34	0.8
GALR3	2.18	0.029	0.72	1.85	0.064	0.82	-0.38	0.71	0.94
GSC2	-2.19	0.029	0.72	0.36	0.72	0.98	-0.29	0.77	0.96
MUC12	2.19	0.029	0.72	0.02	0.98	1	1.94	0.053	0.5
POLE3	-2.19	0.029	0.72	0.4	0.69	0.98	3.61	0.00033	0.067
RAE1	-2.19	0.029	0.72	-0.28	0.78	0.98	1.97	0.049	0.49
SFR1	-2.19	0.029	0.72	2	0.046	0.8	-0.08	0.94	0.99
SIAE	-2.18	0.029	0.72	-1.72	0.086	0.85	0.74	0.46	0.87
STAT4	-2.19	0.029	0.72	-0.71	0.48	0.96	0.24	0.81	0.97
TMED1	2.19	0.029	0.72	-1.86	0.064	0.82	-0.97	0.33	0.8
ZNF189	2.19	0.029	0.72	0.9	0.37	0.95	-0.82	0.41	0.84
ARHGAP33	2.17	0.03	0.72	0.85	0.4	0.95	-1.01	0.32	0.79
CIT	-2.17	0.03	0.72	1.97	0.05	0.8	-1.51	0.13	0.63
CRP	-2.17	0.03	0.72	1.11	0.27	0.93	-0.12	0.9	0.98
CYBC1	2.18	0.03	0.72	0.59	0.56	0.97	-2.1	0.036	0.45
FAM222A	2.17	0.03	0.72	0.21	0.83	0.99	-0.96	0.34	0.8
GNRH2	-2.17	0.03	0.72	-0.33	0.74	0.98	1.35	0.18	0.68
GPN3	-2.17	0.03	0.72	-0.43	0.67	0.97	-0.06	0.95	0.99
IGHMBP2	2.17	0.03	0.72	-0.24	0.81	0.99	-0.95	0.34	0.8
KCTD20	-2.18	0.03	0.72	2.21	0.027	0.77	1.23	0.22	0.73
MTG2	-2.17	0.03	0.72	2.47	0.014	0.71	-0.5	0.62	0.92
NUDT11	2.18	0.03	0.72	-0.26	0.79	0.98	-1.39	0.17	0.67
PDGFRA	-2.18	0.03	0.72	-1.71	0.088	0.85	2.9	0.0038	0.22
PRCC	2.17	0.03	0.72	-1.02	0.31	0.94	2.05	0.041	0.46
SERTAD3	2.17	0.03	0.72	1.2	0.23	0.93	0.61	0.54	0.89
SIAH2	-2.17	0.03	0.72	-3.25	0.0012	0.52	1.59	0.11	0.6
SLC16A3	2.18	0.03	0.72	-0.45	0.65	0.97	-1.06	0.29	0.77
SLFN12	-2.17	0.03	0.72	-0.93	0.35	0.95	0.87	0.38	0.83
SNAP23	2.17	0.03	0.72	-1.99	0.047	0.8	-0.87	0.38	0.83
SRGAP1	-2.18	0.03	0.72	-0.07	0.94	1	0.46	0.65	0.93
USP53	2.17	0.03	0.72	-1.01	0.31	0.94	-0.01	1	1
UTP20	-2.18	0.03	0.72	1.09	0.28	0.94	3.13	0.0018	0.17
XAGE5	2.18	0.03	0.72	0.93	0.36	0.95	-0.63	0.53	0.89
ACAA1	2.16	0.031	0.72	-0.74	0.46	0.96	-0.67	0.5	0.88
AMIGO1	-2.16	0.031	0.72	0.82	0.41	0.95	-1.15	0.25	0.75
ARSF	2.16	0.031	0.72	0.34	0.73	0.98	-2.16	0.031	0.43
CARNMT1	2.16	0.031	0.72	2.27	0.023	0.73	0	1	1
CCL20	-2.16	0.031	0.72	0.39	0.69	0.98	1.79	0.073	0.54
CEP44	2.16	0.031	0.72	1.05	0.3	0.94	-0.34	0.73	0.95
CHMP7	2.16	0.031	0.72	-0.06	0.95	1	-1.88	0.06	0.51
GNPAT	-2.16	0.031	0.72	-0.9	0.37	0.95	1.07	0.29	0.77
GPR3	2.16	0.031	0.72	0.2	0.84	0.99	-1.84	0.066	0.53
HIST1H2AI	-2.16	0.031	0.72	1.15	0.25	0.93	1.41	0.16	0.66
HOXD12	-2.17	0.031	0.72	-0.19	0.85	0.99	1.5	0.13	0.63
HYAL4	-2.16	0.031	0.72	1.01	0.31	0.94	0.14	0.89	0.98
LIPC	2.16	0.031	0.72	-0.61	0.54	0.97	-0.62	0.54	0.89
LMAN2L	-2.16	0.031	0.72	0.85	0.39	0.95	0.29	0.77	0.96
MYEOV	2.16	0.031	0.72	1.65	0.098	0.86	-1.66	0.096	0.58
NFYC	2.17	0.031	0.72	-0.32	0.75	0.98	-1.04	0.3	0.78
PLXNB3	2.16	0.031	0.72	1.12	0.26	0.93	-2.24	0.026	0.41
RING1	-2.16	0.031	0.72	2.26	0.024	0.73	-0.49	0.62	0.92
RNF2	-2.16	0.031	0.72	-0.48	0.63	0.97	-0.22	0.82	0.97
TCEAL4	-2.16	0.031	0.72	-0.5	0.62	0.97	1	0.32	0.79
TFRC	-2.16	0.031	0.72	-1.16	0.25	0.93	1.37	0.17	0.68
THAP1	2.16	0.031	0.72	2.92	0.0036	0.59	-2.87	0.0043	0.23
TUBD1	2.17	0.031	0.72	0.55	0.58	0.97	-0.31	0.76	0.95
USP28	-2.16	0.031	0.72	0.06	0.95	1	-5	7.2e-07	0.00077
ZC3H7A	2.16	0.031	0.72	-0.36	0.72	0.98	1.54	0.12	0.62
CCL4L2	-2.15	0.032	0.73	2.44	0.015	0.71	1.17	0.24	0.74
CDCA2	2.15	0.032	0.73	0.19	0.85	0.99	0.3	0.77	0.96
CNTNAP5	2.15	0.032	0.73	-1.01	0.31	0.94	-1.55	0.12	0.61
DEFB127	2.14	0.032	0.73	1	0.32	0.94	-0.65	0.51	0.89
GHRH	2.15	0.032	0.73	-0.78	0.44	0.96	-2.26	0.024	0.41
KBTBD6	-2.15	0.032	0.73	0.84	0.4	0.95	1.26	0.21	0.71
KCNS3	-2.15	0.032	0.73	1.31	0.19	0.92	1.71	0.087	0.56
MCL1	-2.15	0.032	0.73	0.78	0.44	0.96	-1.13	0.26	0.75
MMP11	2.15	0.032	0.73	0.24	0.81	0.99	-3.47	0.00056	0.096
NBPF3	-2.15	0.032	0.73	-1.25	0.21	0.92	1.87	0.061	0.52
PIGB	-2.15	0.032	0.73	-2.4	0.017	0.72	2.97	0.0031	0.21
POU4F3	2.15	0.032	0.73	0.57	0.57	0.97	-2.49	0.013	0.34
PPP2R2B	2.15	0.032	0.73	0.89	0.37	0.95	-2.28	0.023	0.4
RPL27A	2.15	0.032	0.73	-0.1	0.92	0.99	1.61	0.11	0.6
SKAP1	2.15	0.032	0.73	-0.5	0.62	0.97	-2.61	0.0092	0.3
SMURF1	2.14	0.032	0.73	0.49	0.62	0.97	-2.42	0.016	0.36
SYNJ2	2.15	0.032	0.73	0.73	0.47	0.96	0.64	0.53	0.89
TEDC1	2.15	0.032	0.73	1.55	0.12	0.88	0.71	0.48	0.87
USP17L13	2.14	0.032	0.73	0.82	0.41	0.95	1.08	0.28	0.76
UTP25	-2.15	0.032	0.73	-1.8	0.073	0.83	2.35	0.019	0.38
ZFP37	2.15	0.032	0.73	-1.81	0.071	0.83	0.27	0.79	0.96
CYP20A1	2.13	0.033	0.73	-0.75	0.45	0.96	-3	0.0028	0.21
FAM110D	2.13	0.033	0.73	1.46	0.15	0.9	-2.57	0.01	0.31
MANSC1	-2.14	0.033	0.73	-1.22	0.22	0.93	1.28	0.2	0.71
MAP3K10	2.14	0.033	0.73	-0.19	0.85	0.99	-4.02	6.4e-05	0.024
NKX3-2	2.14	0.033	0.73	-1.17	0.24	0.93	-0.45	0.66	0.93
ORC5	-2.14	0.033	0.73	0.36	0.72	0.98	-1.65	0.099	0.58
PDZD3	-2.13	0.033	0.73	0.16	0.87	0.99	0.16	0.87	0.98
PLAC1	2.14	0.033	0.73	-1.15	0.25	0.93	-1.77	0.077	0.55
PSIP1	-2.14	0.033	0.73	1.02	0.31	0.94	1.19	0.23	0.74
PTAR1	2.14	0.033	0.73	0.32	0.75	0.98	0.04	0.97	0.99
RAB27B	-2.14	0.033	0.73	-0.82	0.41	0.95	3.05	0.0024	0.19
RIMBP2	-2.14	0.033	0.73	-0.12	0.91	0.99	-0.32	0.75	0.95
RPRD2	-2.14	0.033	0.73	-1.14	0.26	0.93	-2.11	0.035	0.45
SHH	2.14	0.033	0.73	-0.49	0.62	0.97	-1.54	0.12	0.62
SLITRK3	-2.14	0.033	0.73	-1.79	0.073	0.83	1.11	0.27	0.76
TMEM139	-2.13	0.033	0.73	0.08	0.94	1	1.74	0.082	0.55
TRIM32	2.13	0.033	0.73	-0.85	0.4	0.95	-1.14	0.25	0.75
UHRF2	-2.14	0.033	0.73	-0.49	0.62	0.97	0.88	0.38	0.82
WFDC1	2.14	0.033	0.73	1.3	0.2	0.92	-1.85	0.065	0.53
AFF2	-2.13	0.034	0.73	-0.33	0.74	0.98	0.6	0.55	0.9
CCDC90B	2.12	0.034	0.73	0.62	0.53	0.96	-1.49	0.14	0.63
CYP2W1	2.13	0.034	0.73	1.57	0.12	0.88	-1.09	0.28	0.76
DHX57	-2.12	0.034	0.73	-0.1	0.92	0.99	2.32	0.021	0.39
EPRS	-2.13	0.034	0.73	-0.01	0.99	1	0.85	0.4	0.83
FBXO45	-2.13	0.034	0.73	-1.32	0.19	0.91	0.73	0.46	0.87
GOT1	2.13	0.034	0.73	-0.57	0.57	0.97	-1.52	0.13	0.62
KIF25	2.13	0.034	0.73	-2.25	0.025	0.74	-1	0.32	0.79
LANCL3	2.13	0.034	0.73	-0.17	0.87	0.99	-1.13	0.26	0.75
MAPK11	2.13	0.034	0.73	-0.02	0.99	1	-2.29	0.022	0.4
MRS2	-2.12	0.034	0.73	-0.27	0.79	0.98	-0.46	0.64	0.93
MSH5	-2.12	0.034	0.73	2.75	0.0061	0.64	-0.11	0.91	0.99
MSRB1	2.12	0.034	0.73	2.55	0.011	0.69	-0.98	0.33	0.8
NUP107	-2.13	0.034	0.73	-1.5	0.14	0.89	0.55	0.58	0.91
PTPN9	2.12	0.034	0.73	-1.03	0.3	0.94	-0.66	0.51	0.88
RPL31	2.13	0.034	0.73	-0.21	0.84	0.99	2.02	0.044	0.47
SASH3	2.12	0.034	0.73	-0.79	0.43	0.96	-1.6	0.11	0.6
SCFD1	2.12	0.034	0.73	2.56	0.011	0.69	-0.23	0.82	0.97
SLC7A6OS	-2.13	0.034	0.73	-1.19	0.24	0.93	-0.77	0.44	0.86
SREK1	2.12	0.034	0.73	0.36	0.72	0.98	0.35	0.73	0.95
TCP11L2	-2.13	0.034	0.73	0.31	0.76	0.98	0.18	0.86	0.98
TMEM150C	-2.13	0.034	0.73	1.65	0.099	0.86	0.67	0.51	0.88
WDR90	-2.13	0.034	0.73	2.74	0.0064	0.64	-0.46	0.64	0.93
WEE2	2.13	0.034	0.73	0.22	0.83	0.99	-1.78	0.075	0.54
ZNF76	-2.12	0.034	0.73	-0.52	0.61	0.97	-0.51	0.61	0.92
ABCG8	-2.12	0.035	0.73	-0.17	0.86	0.99	0.72	0.47	0.87
ABI1	2.11	0.035	0.73	-0.21	0.83	0.99	0.84	0.4	0.84
ADRA1B	-2.11	0.035	0.73	-0.43	0.66	0.97	0.72	0.47	0.87
AKAP5	2.11	0.035	0.73	-0.39	0.7	0.98	-0.42	0.68	0.93
ALKBH5	2.12	0.035	0.73	0.38	0.7	0.98	-3.29	0.001	0.13
BTD	-2.11	0.035	0.73	0.44	0.66	0.97	2.53	0.012	0.32
C1orf54	-2.11	0.035	0.73	-0.21	0.83	0.99	0.91	0.37	0.82
CACNA2D4	-2.11	0.035	0.73	-0.33	0.74	0.98	0.59	0.55	0.9
DSN1	-2.11	0.035	0.73	-2.33	0.02	0.73	2.88	0.0042	0.23
EFCAB6	-2.11	0.035	0.73	0.85	0.4	0.95	0.64	0.53	0.89
EIF2AK1	2.11	0.035	0.73	-0.76	0.45	0.96	-2.22	0.027	0.42
FFAR4	2.11	0.035	0.73	-0.15	0.88	0.99	-1.2	0.23	0.73
HRNR	2.12	0.035	0.73	-0.98	0.33	0.94	-0.51	0.61	0.92
KRI1	2.12	0.035	0.73	-0.67	0.5	0.96	-1.15	0.25	0.75
MCCC1	-2.11	0.035	0.73	0.4	0.69	0.98	0.69	0.49	0.88
MED12	2.11	0.035	0.73	-0.9	0.37	0.95	-2.38	0.018	0.37
NDE1	2.12	0.035	0.73	0.09	0.93	1	-2.09	0.037	0.46
RASL10A	2.12	0.035	0.73	-1.28	0.2	0.92	-2.34	0.02	0.38
RBBP7	2.11	0.035	0.73	-0.09	0.93	0.99	0.18	0.86	0.98
SLC10A7	2.11	0.035	0.73	-0.67	0.51	0.96	0.74	0.46	0.87
SLC38A10	2.12	0.035	0.73	0.71	0.48	0.96	-2.43	0.015	0.36
SLURP2	2.11	0.035	0.73	0.2	0.84	0.99	-1	0.32	0.79
SOBP	-2.11	0.035	0.73	-0.53	0.6	0.97	1.65	0.1	0.58
TLN1	2.11	0.035	0.73	1.02	0.31	0.94	1.59	0.11	0.6
TTLL7	-2.11	0.035	0.73	0.92	0.36	0.95	0.09	0.92	0.99
ATAD3C	2.1	0.036	0.73	-0.3	0.76	0.98	-1.88	0.06	0.51
CCDC157	2.1	0.036	0.73	-0.99	0.32	0.94	-1.18	0.24	0.74
CD83	-2.1	0.036	0.73	-0.15	0.88	0.99	1.66	0.096	0.58
CEP170	-2.1	0.036	0.73	-1.86	0.063	0.82	1.48	0.14	0.64
DDX28	-2.1	0.036	0.73	1.23	0.22	0.93	-0.8	0.42	0.85
DHX16	2.1	0.036	0.73	0.92	0.36	0.95	0.21	0.84	0.97
EDC4	-2.1	0.036	0.73	-0.77	0.44	0.96	-1.05	0.29	0.77
ELK1	2.1	0.036	0.73	1.07	0.29	0.94	-1.67	0.095	0.58
GLCCI1	2.1	0.036	0.73	0.31	0.76	0.98	-2.53	0.012	0.32
GRAMD1C	-2.1	0.036	0.73	-0.87	0.38	0.95	1.67	0.096	0.58
KAT2A	-2.1	0.036	0.73	-0.61	0.54	0.97	0.15	0.88	0.98
KHDC1L	-2.1	0.036	0.73	-1.23	0.22	0.93	0.52	0.6	0.92
KIF3B	-2.1	0.036	0.73	0.37	0.71	0.98	0.33	0.74	0.95
LDB2	-2.1	0.036	0.73	0.16	0.87	0.99	2.77	0.0057	0.26
NCOA6	2.1	0.036	0.73	0.33	0.74	0.98	0.67	0.5	0.88
NLE1	-2.1	0.036	0.73	0.86	0.39	0.95	0.42	0.68	0.94
NUDT8	2.1	0.036	0.73	2.06	0.04	0.78	-1.39	0.16	0.67
OGFOD3	2.1	0.036	0.73	-0.26	0.8	0.98	-2.67	0.0078	0.29
PRMT9	2.11	0.036	0.73	2.45	0.014	0.71	1.56	0.12	0.61
PRPS1L1	2.1	0.036	0.73	0.43	0.67	0.97	-1.12	0.26	0.76
RBM10	2.1	0.036	0.73	-0.17	0.87	0.99	-2.72	0.0068	0.27
SLC6A4	-2.1	0.036	0.73	0.19	0.85	0.99	0.89	0.37	0.82
SOX30	2.1	0.036	0.73	-1.74	0.081	0.85	-1.93	0.054	0.5
WDR89	2.1	0.036	0.73	-1.27	0.2	0.92	4.32	1.8e-05	0.0094
ZBTB10	2.1	0.036	0.73	0.63	0.53	0.96	-1.39	0.16	0.67
ZNF107	2.1	0.036	0.73	-0.5	0.62	0.97	0.34	0.73	0.95
AP3S2	2.09	0.037	0.74	0.36	0.72	0.98	-0.5	0.62	0.92
BDKRB1	-2.09	0.037	0.74	1.42	0.16	0.9	-0.72	0.47	0.87
BORA	2.09	0.037	0.73	1.97	0.049	0.8	-1.81	0.071	0.54
F13B	-2.09	0.037	0.74	-1.34	0.18	0.91	2.58	0.01	0.31
FNDC3A	2.09	0.037	0.74	0.87	0.39	0.95	-0.84	0.4	0.84
HIST1H4G	2.08	0.037	0.74	-0.16	0.88	0.99	-2.05	0.041	0.46
HSPD1	-2.09	0.037	0.74	1.21	0.23	0.93	-0.52	0.6	0.92
KLF14	2.08	0.037	0.74	0.34	0.73	0.98	-1.06	0.29	0.77
LILRA1	2.09	0.037	0.74	-1.33	0.18	0.91	-0.13	0.9	0.98
MINDY2	2.09	0.037	0.74	0.75	0.45	0.96	-0.24	0.81	0.97
MORF4L2	-2.09	0.037	0.74	1.89	0.059	0.82	2.1	0.036	0.45
OTOG	-2.09	0.037	0.73	-1.33	0.18	0.91	0.3	0.76	0.95
PYROXD1	2.09	0.037	0.74	0.86	0.39	0.95	-0.2	0.84	0.97
TIMM8B	2.09	0.037	0.74	-1.62	0.11	0.87	-2.06	0.04	0.46
TMEM178A	-2.1	0.037	0.73	0.11	0.91	0.99	1.74	0.083	0.56
TMEM242	-2.09	0.037	0.73	1.05	0.29	0.94	1.42	0.15	0.66
TMPRSS5	-2.09	0.037	0.74	-0.18	0.85	0.99	-2.23	0.026	0.42
TPPP3	2.09	0.037	0.74	-1.01	0.31	0.94	-2.81	0.0052	0.25
AGER	-2.08	0.038	0.74	-0.96	0.34	0.94	0.39	0.69	0.94
ARSJ	-2.08	0.038	0.74	0.67	0.5	0.96	1.37	0.17	0.67
CCNY	2.07	0.038	0.74	0.04	0.97	1	0.39	0.69	0.94
COMMD7	2.08	0.038	0.74	0.28	0.78	0.98	-2.38	0.018	0.37
COPB2	2.08	0.038	0.74	-1.39	0.17	0.91	1.48	0.14	0.64
CRADD	2.07	0.038	0.74	-1.72	0.086	0.85	-0.75	0.45	0.86
FRMD8	2.08	0.038	0.74	0.61	0.54	0.97	-0.89	0.38	0.82
FUT2	2.08	0.038	0.74	-0.83	0.41	0.95	-0.55	0.58	0.91
GFRAL	-2.08	0.038	0.74	1.34	0.18	0.91	-0.1	0.92	0.99
GGA1	2.08	0.038	0.74	0.39	0.7	0.98	-1.95	0.051	0.49
LAMTOR3	2.08	0.038	0.74	-1.08	0.28	0.94	-1.01	0.31	0.79
MPPE1	-2.08	0.038	0.74	0.6	0.55	0.97	-1.71	0.088	0.57
MRPS27	-2.08	0.038	0.74	1.87	0.062	0.82	-0.14	0.89	0.98
MYBL2	-2.07	0.038	0.74	-1.14	0.25	0.93	-0.62	0.54	0.89
OR52H1	-2.08	0.038	0.74	1.81	0.071	0.83	2.25	0.025	0.41
PDE6G	2.08	0.038	0.74	-1.03	0.3	0.94	-0.99	0.32	0.79
POM121C	2.08	0.038	0.74	0.35	0.73	0.98	-0.62	0.53	0.89
POMK	2.08	0.038	0.74	-1.1	0.27	0.93	-0.88	0.38	0.83
RHOT2	2.08	0.038	0.74	0.98	0.33	0.94	0	1	1
RSU1	2.08	0.038	0.74	0.55	0.58	0.97	0.46	0.65	0.93
TTC28	2.08	0.038	0.74	-0.89	0.37	0.95	0.49	0.63	0.92
ZCCHC10	2.08	0.038	0.74	-1.55	0.12	0.88	-1.25	0.21	0.72
ZNF385D	-2.08	0.038	0.74	-0.62	0.53	0.96	0.61	0.54	0.89
ZNF543	2.07	0.038	0.74	-0.49	0.63	0.97	0.2	0.84	0.97
ACER3	2.06	0.039	0.74	-0.86	0.39	0.95	-1.38	0.17	0.67
CIAPIN1	-2.07	0.039	0.74	-1.06	0.29	0.94	3.26	0.0012	0.14
DNAJA1	-2.07	0.039	0.74	0.36	0.72	0.98	3.02	0.0026	0.2
GML	2.07	0.039	0.74	-1.1	0.27	0.94	-0.34	0.74	0.95
HASPIN	2.07	0.039	0.74	1.26	0.21	0.92	-2.94	0.0034	0.21
HIST1H1A	-2.07	0.039	0.74	0.1	0.92	0.99	3.89	0.00011	0.033
NRXN3	-2.07	0.039	0.74	-0.17	0.87	0.99	0.31	0.76	0.95
OR5M8	2.07	0.039	0.74	-0.32	0.75	0.98	-1.15	0.25	0.75
PCCA	-2.06	0.039	0.74	-2.39	0.017	0.72	1.55	0.12	0.61
PPM1E	2.07	0.039	0.74	0.16	0.87	0.99	-1.01	0.31	0.79
SCPEP1	2.07	0.039	0.74	1.9	0.058	0.82	-0.85	0.4	0.83
SF1	2.07	0.039	0.74	0.15	0.88	0.99	0.31	0.76	0.95
THAP8	2.07	0.039	0.74	1.7	0.09	0.85	-1.51	0.13	0.63
THNSL1	2.07	0.039	0.74	-0.37	0.71	0.98	-1.13	0.26	0.75
WDR45B	2.07	0.039	0.74	-0.72	0.47	0.96	-1.96	0.05	0.49
ZBTB7A	2.07	0.039	0.74	-0.93	0.35	0.95	-1.88	0.061	0.52
ZSCAN31	-2.07	0.039	0.74	-0.63	0.53	0.96	-0.23	0.82	0.97
ARMH3	-2.06	0.04	0.74	-0.05	0.96	1	0.95	0.34	0.8
BCL2L12	2.06	0.04	0.74	-1.15	0.25	0.93	-1.15	0.25	0.75
C6orf132	-2.06	0.04	0.74	1.31	0.19	0.92	-0.33	0.74	0.95
DNAJB11	-2.05	0.04	0.74	1.19	0.23	0.93	-0.22	0.83	0.97
E2F8	2.06	0.04	0.74	0.55	0.58	0.97	-1.25	0.21	0.72
FAM102B	-2.06	0.04	0.74	-0.21	0.84	0.99	-0.51	0.61	0.92
FNDC11	-2.06	0.04	0.74	-0.39	0.7	0.98	1.09	0.27	0.76
FPR2	2.06	0.04	0.74	-1.94	0.052	0.81	-1.5	0.13	0.63
GABRA6	2.06	0.04	0.74	-0.24	0.81	0.99	-0.02	0.99	1
JMJD6	2.06	0.04	0.74	0	1	1	-2.13	0.034	0.44
KIAA0391	-2.06	0.04	0.74	2.73	0.0064	0.64	-2.07	0.039	0.46
LPAR2	2.06	0.04	0.74	0.39	0.69	0.98	-1.81	0.07	0.53
MT1M	2.06	0.04	0.74	-0.3	0.76	0.98	-0.44	0.66	0.93
OR2T35	2.06	0.04	0.74	-1.21	0.23	0.93	1.09	0.28	0.76
PPRC1	-2.06	0.04	0.74	0.48	0.63	0.97	0.19	0.85	0.97
PRKG2	2.06	0.04	0.74	3.08	0.0021	0.54	-1.78	0.075	0.54
PRODH	-2.06	0.04	0.74	0.18	0.86	0.99	1.5	0.13	0.63
RAD23B	2.06	0.04	0.74	1	0.32	0.94	0	1	1
SMCHD1	-2.06	0.04	0.74	-0.06	0.95	1	1.81	0.07	0.53
SUZ12	-2.06	0.04	0.74	0.87	0.39	0.95	0.42	0.67	0.93
TIMM50	2.05	0.04	0.74	-0.37	0.71	0.98	-0.27	0.79	0.96
ZIC4	2.06	0.04	0.74	-0.93	0.35	0.95	-1.71	0.089	0.57
ZNF287	2.06	0.04	0.74	0.66	0.51	0.96	-0.57	0.57	0.91
BHLHA15	2.05	0.041	0.74	-1.13	0.26	0.93	-0.13	0.89	0.98
DHX35	-2.05	0.041	0.74	-0.25	0.81	0.99	-0.28	0.78	0.96
DNAJC10	-2.04	0.041	0.75	0.74	0.46	0.96	1.28	0.2	0.71
GPATCH8	-2.05	0.041	0.74	0.14	0.89	0.99	-2.19	0.029	0.43
GSTM2	-2.05	0.041	0.75	2.09	0.037	0.78	1.09	0.28	0.76
HIST1H1T	-2.05	0.041	0.75	0.73	0.47	0.96	0.24	0.81	0.97
IQCB1	-2.05	0.041	0.74	-2.08	0.038	0.78	3.42	0.00067	0.11
ME2	-2.05	0.041	0.74	-0.07	0.95	1	1.67	0.096	0.58
NWD2	-2.05	0.041	0.75	-0.12	0.91	0.99	0.82	0.41	0.84
OPN5	-2.05	0.041	0.74	-2.06	0.04	0.78	-0.8	0.42	0.85
PFDN1	2.05	0.041	0.74	2.16	0.031	0.77	-0.67	0.5	0.88
PTGES2	2.04	0.041	0.75	0.58	0.56	0.97	-1.17	0.24	0.74
RAB4A	-2.05	0.041	0.74	-1.18	0.24	0.93	1.31	0.19	0.7
SERPINI2	-2.04	0.041	0.75	-2.28	0.023	0.73	2.04	0.042	0.46
SLAMF7	-2.05	0.041	0.74	1.07	0.28	0.94	1.45	0.15	0.65
SLC35A2	2.04	0.041	0.75	-0.14	0.89	0.99	-0.68	0.5	0.88
TCP10L2	2.04	0.041	0.75	-1.33	0.18	0.91	0.38	0.7	0.94
TIMM17A	2.05	0.041	0.75	-0.19	0.85	0.99	-1.29	0.2	0.7
TMEM151A	2.05	0.041	0.74	-0.15	0.88	0.99	-1.18	0.24	0.74
TRPC1	-2.05	0.041	0.74	-1.55	0.12	0.88	0.45	0.65	0.93
ZNF701	2.04	0.041	0.75	-1.7	0.089	0.85	0.18	0.86	0.98
ADAM2	2.04	0.042	0.75	1.43	0.15	0.9	0.06	0.96	0.99
AGR3	2.04	0.042	0.75	0.43	0.67	0.97	-1.83	0.067	0.53
ATP6V1D	2.04	0.042	0.75	0.2	0.84	0.99	-1.33	0.18	0.69
C3orf38	2.04	0.042	0.75	0.29	0.77	0.98	2.99	0.0029	0.21
CAP2	-2.04	0.042	0.75	0.49	0.62	0.97	-0.99	0.32	0.79
CRK	2.04	0.042	0.75	-1.27	0.2	0.92	0.11	0.92	0.99
DAAM2	-2.04	0.042	0.75	0.99	0.32	0.94	-0.61	0.54	0.89
DPP3	2.03	0.042	0.75	0.78	0.43	0.96	-1.88	0.061	0.52
FAM71E1	2.03	0.042	0.75	-0.99	0.32	0.94	-1.15	0.25	0.75
FOXJ1	2.04	0.042	0.75	-1.53	0.13	0.89	-2.1	0.037	0.45
GIPC3	2.03	0.042	0.75	-1.57	0.12	0.88	-2.37	0.018	0.37
HIST1H2BE	2.04	0.042	0.75	0.58	0.56	0.97	0.41	0.68	0.94
IFI27	-2.04	0.042	0.75	0.56	0.58	0.97	0.85	0.4	0.83
MAP3K13	2.04	0.042	0.75	-0.09	0.93	1	-1.29	0.2	0.7
PANX1	-2.04	0.042	0.75	-0.25	0.8	0.99	-0.93	0.35	0.81
PON2	-2.03	0.042	0.75	-0.34	0.73	0.98	2.74	0.0063	0.27
PRR14L	-2.04	0.042	0.75	0.81	0.42	0.95	0.37	0.71	0.94
PTBP2	-2.04	0.042	0.75	0.31	0.75	0.98	-0.54	0.59	0.91
PTGER3	-2.04	0.042	0.75	-1.01	0.31	0.94	-0.37	0.71	0.94
RFX6	-2.04	0.042	0.75	-1.12	0.26	0.93	1.54	0.12	0.61
SERPINI1	-2.04	0.042	0.75	-0.48	0.63	0.97	2.71	0.0069	0.28
TBC1D3B	-2.04	0.042	0.75	-0.11	0.91	0.99	1.08	0.28	0.77
THPO	-2.04	0.042	0.75	-0.12	0.9	0.99	1.67	0.096	0.58
TUBB6	-2.04	0.042	0.75	0.89	0.37	0.95	1.62	0.1	0.59
AP3B2	-2.02	0.043	0.75	1.22	0.22	0.93	-0.15	0.88	0.98
BTBD2	2.03	0.043	0.75	-1.08	0.28	0.94	-1.98	0.048	0.48
CDC20	2.03	0.043	0.75	-1.06	0.29	0.94	-0.05	0.96	0.99
CDK16	2.02	0.043	0.75	0.57	0.57	0.97	-2.31	0.021	0.39
CORO1A	-2.03	0.043	0.75	-1.24	0.22	0.93	1.16	0.25	0.74
CREB1	2.03	0.043	0.75	-0.31	0.75	0.98	-0.59	0.55	0.9
CTNNBIP1	-2.03	0.043	0.75	0.8	0.43	0.96	-0.81	0.42	0.84
FGFRL1	-2.03	0.043	0.75	-0.17	0.86	0.99	-0.34	0.73	0.95
IER3	-2.03	0.043	0.75	1.15	0.25	0.93	-1.08	0.28	0.77
IRF6	-2.03	0.043	0.75	1.04	0.3	0.94	1.45	0.15	0.65
JAZF1	2.02	0.043	0.75	0.67	0.5	0.96	-0.1	0.92	0.99
MLXIPL	2.03	0.043	0.75	-0.53	0.6	0.97	-2.18	0.03	0.43
MYCL	-2.03	0.043	0.75	0.17	0.87	0.99	1.45	0.15	0.65
PDE6D	2.03	0.043	0.75	0.63	0.53	0.96	-0.34	0.73	0.95
POLD2	-2.02	0.043	0.75	-0.52	0.6	0.97	-1.09	0.28	0.76
PPP2R5E	2.03	0.043	0.75	1.58	0.12	0.88	-1.64	0.1	0.59
SPDYE3	-2.03	0.043	0.75	0.13	0.9	0.99	1.16	0.25	0.74
ZNF582	2.03	0.043	0.75	-1.03	0.3	0.94	-1.09	0.27	0.76
BAIAP2L1	2.02	0.044	0.75	0.02	0.98	1	-1.17	0.24	0.74
CCER2	2.02	0.044	0.75	0.74	0.46	0.96	-2.54	0.011	0.32
CPLX3	-2.02	0.044	0.75	1.46	0.14	0.9	-0.79	0.43	0.85
DCAF16	2.02	0.044	0.75	1.24	0.22	0.92	-0.75	0.45	0.86
DEGS1	2.01	0.044	0.75	0.36	0.72	0.98	-0.24	0.81	0.97
DKK3	2.01	0.044	0.75	0.31	0.75	0.98	-0.2	0.84	0.97
ELAC1	-2.02	0.044	0.75	-0.52	0.6	0.97	0.6	0.55	0.9
FN3KRP	2.01	0.044	0.75	-0.78	0.44	0.96	-1.71	0.088	0.57
FOXQ1	-2.02	0.044	0.75	0.35	0.72	0.98	0.45	0.65	0.93
FUT3	2.02	0.044	0.75	-1.52	0.13	0.89	-0.75	0.45	0.86
GRB2	2.02	0.044	0.75	0.46	0.65	0.97	-1.24	0.21	0.72
HTR3B	-2.02	0.044	0.75	0.69	0.49	0.96	1.2	0.23	0.73
IPO5	2.02	0.044	0.75	-0.82	0.41	0.95	0.96	0.34	0.8
KDM1B	-2.02	0.044	0.75	-0.49	0.63	0.97	1.72	0.086	0.56
LACTB2	-2.02	0.044	0.75	-0.09	0.93	1	1.4	0.16	0.67
LGR5	-2.02	0.044	0.75	-2.03	0.043	0.79	3.42	0.00065	0.11
LRRC75A	2.01	0.044	0.75	-0.98	0.33	0.94	-1.04	0.3	0.78
MGAT4B	-2.02	0.044	0.75	-1.63	0.1	0.87	1.56	0.12	0.61
OR5B12	2.01	0.044	0.75	1.19	0.24	0.93	-1.39	0.16	0.67
OTULIN	-2.02	0.044	0.75	-0.83	0.41	0.95	3.11	0.0019	0.18
RETNLB	-2.02	0.044	0.75	-2.27	0.023	0.73	2.19	0.029	0.43
RNF170	2.02	0.044	0.75	-0.1	0.92	0.99	0.26	0.79	0.96
STARD8	2.02	0.044	0.75	0.76	0.45	0.96	-0.79	0.43	0.85
TCHH	2.01	0.044	0.75	-0.77	0.44	0.96	0.09	0.93	0.99
TEX36	2.02	0.044	0.75	-0.07	0.95	1	-0.16	0.87	0.98
THOC5	-2.01	0.044	0.75	-0.63	0.53	0.96	-1.36	0.18	0.68
TLE2	2.01	0.044	0.75	-0.31	0.76	0.98	-1.43	0.15	0.66
UXS1	2.02	0.044	0.75	0.18	0.86	0.99	1.48	0.14	0.63
ZNF257	2.02	0.044	0.75	-0.67	0.51	0.96	-0.5	0.62	0.92
ABCC11	-2.01	0.045	0.75	-0.66	0.51	0.96	1.32	0.19	0.69
B3GALT5	-2.01	0.045	0.75	-0.33	0.74	0.98	2.21	0.027	0.42
BTBD7	2.01	0.045	0.75	-1.14	0.25	0.93	0.51	0.61	0.92
CTC1	-2.01	0.045	0.75	0.3	0.77	0.98	-0.36	0.72	0.95
DNAJB13	-2.01	0.045	0.75	1.19	0.23	0.93	1.48	0.14	0.64
DOK1	-2.01	0.045	0.75	2.51	0.012	0.7	-1.56	0.12	0.61
FAM200B	-2.01	0.045	0.75	0.14	0.89	0.99	2.37	0.018	0.38
GAK	2.01	0.045	0.75	-1.01	0.31	0.94	-0.94	0.35	0.81
GJD4	2.01	0.045	0.75	-0.2	0.84	0.99	0.01	0.99	1
GTF2IRD1	2.01	0.045	0.75	-1.95	0.052	0.81	-0.64	0.52	0.89
ICAM2	2.01	0.045	0.75	1.14	0.25	0.93	-1.49	0.14	0.63
KCNJ12	2.01	0.045	0.75	-0.71	0.48	0.96	-2.36	0.019	0.38
MSL2	2.01	0.045	0.75	-0.2	0.84	0.99	-1.23	0.22	0.73
NR1H3	2.01	0.045	0.75	0.33	0.74	0.98	-0.13	0.9	0.98
OTOF	-2.01	0.045	0.75	0.99	0.32	0.94	0.71	0.48	0.87
PBOV1	2.01	0.045	0.75	0.37	0.71	0.98	-1.19	0.24	0.74
PCID2	-2.01	0.045	0.75	1.81	0.071	0.83	-0.98	0.33	0.8
PTPA	-2.01	0.045	0.75	2.85	0.0045	0.6	0.34	0.74	0.95
RAB3D	2.01	0.045	0.75	-0.59	0.55	0.97	-1.95	0.052	0.49
SARS2	-2.01	0.045	0.75	2.38	0.018	0.72	-1.89	0.059	0.51
SOX17	2.01	0.045	0.75	0.03	0.98	1	0.04	0.97	0.99
ST8SIA6	2	0.045	0.75	0.01	0.99	1	0.99	0.32	0.79
TAS1R2	2.01	0.045	0.75	-0.32	0.75	0.98	-1.05	0.29	0.77
TMEM41A	2.01	0.045	0.75	0.51	0.61	0.97	-1.99	0.048	0.48
XPA	2.01	0.045	0.75	-0.9	0.37	0.95	-0.42	0.67	0.93
ARGLU1	2	0.046	0.75	0.5	0.61	0.97	-2.04	0.041	0.46
ARHGDIA	2	0.046	0.75	0.37	0.71	0.98	-2.01	0.044	0.47
ATP2A2	-2	0.046	0.75	1.42	0.16	0.9	1.36	0.17	0.68
CA14	-2	0.046	0.75	-0.71	0.48	0.96	-0.21	0.84	0.97
CAMKMT	2	0.046	0.75	1.76	0.078	0.84	-2.41	0.016	0.37
ELOC	-2	0.046	0.75	-1.33	0.18	0.91	0.3	0.77	0.96
FAM124B	2	0.046	0.75	0.81	0.42	0.95	-1.66	0.098	0.58
FAM217B	2	0.046	0.75	-1.31	0.19	0.92	-0.62	0.53	0.89
HDGFL1	-2	0.046	0.75	0.79	0.43	0.96	0.49	0.62	0.92
LDHD	-2	0.046	0.75	-0.13	0.9	0.99	1.79	0.073	0.54
MED19	2	0.046	0.75	-0.79	0.43	0.96	-1.29	0.2	0.7
MTHFD1	-2	0.046	0.75	0.21	0.83	0.99	0.77	0.44	0.86
PROCR	1.99	0.046	0.75	-1.13	0.26	0.93	-1.84	0.066	0.53
PTPN1	2	0.046	0.75	-0.75	0.45	0.96	0.06	0.95	0.99
RNF135	2	0.046	0.75	0.25	0.8	0.99	-1.83	0.068	0.53
SS18	-2	0.046	0.75	0.06	0.95	1	1.65	0.099	0.58
SSR4	2	0.046	0.75	0.57	0.57	0.97	-1.95	0.051	0.49
TAF6	-2	0.046	0.75	-1.23	0.22	0.93	1.94	0.053	0.5
TAS2R19	2	0.046	0.75	0.79	0.43	0.96	-0.47	0.64	0.93
TMEM154	2	0.046	0.75	-0.56	0.58	0.97	-0.98	0.33	0.8
TRAPPC12	1.99	0.046	0.75	-0.41	0.69	0.98	0.5	0.62	0.92
UPK2	-2	0.046	0.75	0.86	0.39	0.95	1.17	0.24	0.74
WDPCP	-2	0.046	0.75	0.9	0.37	0.95	0.88	0.38	0.83
ZNF117	2	0.046	0.75	-0.54	0.59	0.97	0.08	0.94	0.99
ZNF318	-2	0.046	0.75	-0.15	0.88	0.99	-5.12	4.1e-07	0.0005
AMIGO2	1.99	0.047	0.75	1.02	0.31	0.94	-2.77	0.0058	0.26
ASPSCR1	1.99	0.047	0.75	0.25	0.8	0.99	-4.19	3.2e-05	0.014
BHLHB9	-1.99	0.047	0.75	-0.05	0.96	1	-0.01	0.99	1
CEP126	-1.99	0.047	0.75	0.06	0.95	1	1.16	0.24	0.74
DDR1	-1.99	0.047	0.75	0.95	0.34	0.94	0.25	0.8	0.97
FCGR2B	-1.99	0.047	0.75	-1.6	0.11	0.88	1.42	0.16	0.66
HOXC4	1.99	0.047	0.75	-0.15	0.88	0.99	-0.69	0.49	0.88
KHK	1.99	0.047	0.75	-0.89	0.37	0.95	0.6	0.55	0.9
METTL2A	1.99	0.047	0.75	-0.73	0.47	0.96	-0.22	0.83	0.97
MFSD6	1.99	0.047	0.75	0.77	0.44	0.96	-0.49	0.63	0.92
MTA1	1.99	0.047	0.75	0.13	0.9	0.99	-2.16	0.031	0.43
MTMR11	-1.99	0.047	0.75	-0.69	0.49	0.96	-1.13	0.26	0.75
NKD2	-1.99	0.047	0.75	0.58	0.56	0.97	0.51	0.61	0.92
NLRP4	-1.99	0.047	0.75	-1.12	0.26	0.93	1.21	0.22	0.73
NPIPB6	-1.99	0.047	0.75	0.35	0.72	0.98	1.54	0.12	0.62
OR2T6	1.99	0.047	0.75	-0.64	0.52	0.96	-1.62	0.11	0.59
PCDH17	-1.99	0.047	0.75	-1.11	0.27	0.93	2.56	0.011	0.31
PLA2G5	-1.99	0.047	0.75	0.58	0.56	0.97	-0.41	0.68	0.94
PYCR1	1.99	0.047	0.75	-1.06	0.29	0.94	-2.62	0.0089	0.3
SPIRE1	-1.99	0.047	0.75	0.11	0.91	0.99	2.21	0.027	0.42
SPRN	-1.99	0.047	0.75	0.44	0.66	0.97	0.92	0.36	0.81
STEAP2	1.99	0.047	0.75	-0.53	0.6	0.97	0.36	0.72	0.95
UBE4B	1.99	0.047	0.75	-1.57	0.12	0.88	-0.69	0.49	0.88
ZCCHC13	-1.99	0.047	0.75	-0.4	0.69	0.98	1.09	0.28	0.76
ACY1	-1.98	0.048	0.75	1.16	0.25	0.93	1.29	0.2	0.7
ALMS1	-1.98	0.048	0.75	-0.01	0.99	1	0.81	0.42	0.85
APOM	-1.98	0.048	0.75	1.39	0.17	0.91	-2.33	0.02	0.39
ARMH4	-1.98	0.048	0.75	-0.45	0.65	0.97	0.02	0.98	1
BIN1	1.98	0.048	0.75	1.59	0.11	0.88	-2.79	0.0054	0.26
CCL3	1.98	0.048	0.75	-1.47	0.14	0.9	-0.02	0.98	1
CLMN	1.98	0.048	0.75	0.55	0.58	0.97	-1.17	0.24	0.74
DAPK3	1.98	0.048	0.75	0.57	0.57	0.97	-2.17	0.03	0.43
FAM122A	1.99	0.048	0.75	0.41	0.68	0.98	-4.01	6.8e-05	0.024
HIST1H2AM	-1.98	0.048	0.75	0.65	0.51	0.96	0.66	0.51	0.88
HOXA4	1.98	0.048	0.75	-0.86	0.39	0.95	-0.6	0.55	0.9
LYRM2	1.98	0.048	0.75	-0.25	0.81	0.99	-2.07	0.039	0.46
MSANTD3	1.98	0.048	0.75	0.24	0.81	0.99	-1.13	0.26	0.75
MXRA5	1.98	0.048	0.75	-0.42	0.68	0.98	-0.32	0.75	0.95
OCSTAMP	1.98	0.048	0.75	-1.39	0.17	0.91	-0.91	0.37	0.82
RPL7A	1.99	0.048	0.75	-1.75	0.081	0.85	-0.03	0.97	1
SIGLEC7	1.98	0.048	0.75	-0.42	0.67	0.97	-2.08	0.038	0.46
UQCRC1	-1.98	0.048	0.75	0.84	0.4	0.95	0.39	0.7	0.94
ZYG11A	1.98	0.048	0.75	-1.36	0.17	0.91	-0.62	0.54	0.89
ACAP3	-1.97	0.049	0.75	0.21	0.83	0.99	-0.75	0.45	0.86
ACTR3	1.97	0.049	0.75	-1.16	0.25	0.93	0.23	0.82	0.97
ADGRE1	1.98	0.049	0.75	-1.78	0.075	0.84	-0.65	0.52	0.89
BICD2	1.97	0.049	0.75	2.39	0.017	0.72	-0.79	0.43	0.85
BOLA1	-1.97	0.049	0.75	0.74	0.46	0.96	1.57	0.12	0.61
CIB1	1.97	0.049	0.75	0.22	0.83	0.99	-1.62	0.1	0.59
CPA4	1.98	0.049	0.75	0.48	0.63	0.97	-0.27	0.79	0.96
EFNA5	1.98	0.049	0.75	-0.37	0.72	0.98	0.74	0.46	0.86
FADS6	1.98	0.049	0.75	2.17	0.031	0.77	-2.95	0.0033	0.21
FBXO32	1.97	0.049	0.75	-0.1	0.92	0.99	-2.49	0.013	0.34
GDAP2	-1.97	0.049	0.75	-0.14	0.89	0.99	0.1	0.92	0.99
HPRT1	1.98	0.049	0.75	0.81	0.42	0.95	0.59	0.55	0.9
PAICS	-1.97	0.049	0.75	0.1	0.92	0.99	1.09	0.27	0.76
RPP21	-1.97	0.049	0.75	0.47	0.64	0.97	-0.44	0.66	0.93
SLIT3	1.98	0.049	0.75	0.76	0.45	0.96	-1.23	0.22	0.73
SMDT1	-1.97	0.049	0.75	0.29	0.77	0.98	-0.21	0.84	0.97
SSR2	1.97	0.049	0.75	0.58	0.56	0.97	-1.04	0.3	0.78
TMEM128	1.98	0.049	0.75	0.65	0.51	0.96	-0.1	0.92	0.99
WDR34	1.97	0.049	0.75	0.18	0.86	0.99	-0.98	0.33	0.8
ZUP1	-1.97	0.049	0.75	-1.56	0.12	0.88	1.87	0.062	0.52
ATP6V0D1	-1.97	0.05	0.75	-1.45	0.15	0.9	1.89	0.059	0.51
CCDC34	1.96	0.05	0.76	0.13	0.9	0.99	1.43	0.15	0.66
CSMD3	-1.96	0.05	0.75	-0.45	0.66	0.97	0.73	0.47	0.87
CTRB2	-1.96	0.05	0.76	-1.14	0.26	0.93	1.22	0.22	0.73
ITGAE	1.97	0.05	0.75	-2.52	0.012	0.69	-1.69	0.091	0.57
KIAA1211	-1.96	0.05	0.76	-0.76	0.45	0.96	1.19	0.24	0.74
MGARP	1.96	0.05	0.76	-0.01	0.99	1	-0.9	0.37	0.82
MLANA	1.97	0.05	0.75	1.4	0.16	0.91	-0.83	0.41	0.84
PHF12	1.96	0.05	0.76	-0.99	0.32	0.94	0.67	0.5	0.88
RASA2	-1.96	0.05	0.75	-0.1	0.92	0.99	2.18	0.03	0.43
RNF157	-1.96	0.05	0.76	0.94	0.35	0.95	0.03	0.97	1
SNORC	1.97	0.05	0.75	0.66	0.51	0.96	-2.18	0.03	0.43
SYNGAP1	-1.96	0.05	0.76	1.74	0.083	0.85	0.21	0.83	0.97
TRAK1	1.97	0.05	0.75	0.65	0.52	0.96	-2.32	0.021	0.39
TRIM50	1.96	0.05	0.76	-1.74	0.082	0.85	1.07	0.28	0.77
TUBB4B	1.97	0.05	0.75	0.9	0.37	0.95	-0.53	0.6	0.92
WARS2	-1.96	0.05	0.76	2.04	0.042	0.79	-0.38	0.7	0.94
XYLT2	1.96	0.05	0.75	-1.47	0.14	0.9	0.07	0.94	0.99
ZNF33B	1.96	0.05	0.76	-0.78	0.44	0.96	-0.65	0.52	0.89
ZNF736	1.96	0.05	0.76	-0.26	0.79	0.98	-0.09	0.93	0.99
AKNA	1.96	0.051	0.76	1.08	0.28	0.94	-2.37	0.018	0.38
ANKRD13C	1.96	0.051	0.76	0.29	0.77	0.98	0.37	0.71	0.94
BRK1	1.96	0.051	0.76	-0.31	0.76	0.98	0.07	0.95	0.99
C17orf67	1.96	0.051	0.76	-0.53	0.59	0.97	-0.25	0.8	0.97
CCDC158	-1.95	0.051	0.76	0.93	0.35	0.95	0.25	0.8	0.97
CFLAR	1.96	0.051	0.76	-0.76	0.45	0.96	0.67	0.5	0.88
DAZAP1	1.95	0.051	0.76	2.12	0.034	0.77	0.46	0.65	0.93
DDX23	1.95	0.051	0.76	-0.45	0.65	0.97	-1.69	0.092	0.57
ERVFRD-1	-1.95	0.051	0.76	1.17	0.24	0.93	1.08	0.28	0.76
FRMPD2	1.95	0.051	0.76	0.92	0.36	0.95	0.42	0.67	0.93
KAT14	-1.95	0.051	0.76	-2.61	0.0094	0.69	0.83	0.4	0.84
LYN	1.95	0.051	0.76	-0.67	0.51	0.96	-0.55	0.58	0.91
MTF2	-1.96	0.051	0.76	0.82	0.41	0.95	0.32	0.75	0.95
NCBP1	-1.96	0.051	0.76	0.26	0.8	0.99	-2.07	0.039	0.46
NUDT3	1.96	0.051	0.76	0.55	0.58	0.97	-2.61	0.0093	0.31
NUP153	1.95	0.051	0.76	0.75	0.45	0.96	-0.84	0.4	0.84
RIPOR2	-1.96	0.051	0.76	0.76	0.45	0.96	1.72	0.087	0.56
UNC119B	-1.96	0.051	0.76	-0.12	0.91	0.99	-1.48	0.14	0.64
UQCR11	1.96	0.051	0.76	-1.43	0.15	0.9	0.08	0.94	0.99
ZNF593	1.95	0.051	0.76	1.47	0.14	0.9	0.2	0.84	0.97
ZNF606	1.95	0.051	0.76	-0.09	0.93	0.99	0.38	0.71	0.94
AARD	1.95	0.052	0.76	-0.25	0.8	0.99	-0.5	0.62	0.92
APOBEC3F	1.95	0.052	0.76	-2.01	0.044	0.8	-1.52	0.13	0.62
ASTE1	-1.95	0.052	0.76	-0.05	0.96	1	0.53	0.59	0.92
ATP1A1	1.94	0.052	0.76	-0.11	0.91	0.99	0.22	0.83	0.97
ATRX	1.94	0.052	0.76	1.31	0.19	0.92	-0.18	0.86	0.98
CEP120	1.94	0.052	0.76	-0.76	0.45	0.96	1.58	0.11	0.6
CHRNA6	1.95	0.052	0.76	1.88	0.061	0.82	-1.89	0.06	0.51
CSHL1	1.95	0.052	0.76	-0.19	0.85	0.99	-1.49	0.14	0.63
LDLRAD3	1.94	0.052	0.76	-1.88	0.061	0.82	1.37	0.17	0.67
MPO	1.95	0.052	0.76	-0.57	0.57	0.97	-2.1	0.036	0.45
RNF220	1.94	0.052	0.76	0.83	0.41	0.95	-2.1	0.036	0.45
RPS6	1.95	0.052	0.76	-1.27	0.21	0.92	0.42	0.67	0.93
SASS6	1.95	0.052	0.76	1.77	0.077	0.84	0.26	0.8	0.97
SMIM5	1.95	0.052	0.76	0.87	0.39	0.95	-3.51	0.00047	0.089
SMO	-1.95	0.052	0.76	-0.34	0.74	0.98	0.15	0.88	0.98
TMOD4	-1.95	0.052	0.76	-1.47	0.14	0.9	2.73	0.0066	0.27
UBA5	1.94	0.052	0.76	0.38	0.71	0.98	-0.68	0.5	0.88
USP49	-1.94	0.052	0.76	1.57	0.12	0.88	-1.46	0.14	0.64
ZNF562	1.95	0.052	0.76	-1.23	0.22	0.93	-0.29	0.77	0.96
ANKRD45	-1.94	0.053	0.76	2.35	0.019	0.72	0.96	0.34	0.8
ARNTL	1.94	0.053	0.76	-0.3	0.76	0.98	-1.19	0.23	0.73
C1orf35	1.94	0.053	0.76	-2.79	0.0054	0.64	-2	0.046	0.47
CBX1	1.94	0.053	0.76	-1.33	0.18	0.91	-0.17	0.87	0.98
CELF2	1.94	0.053	0.76	-0.76	0.45	0.96	0.13	0.9	0.98
CELSR1	-1.94	0.053	0.76	-0.19	0.85	0.99	-0.91	0.36	0.82
CERS4	-1.93	0.053	0.76	-1.47	0.14	0.9	0.3	0.76	0.95
CLEC18C	1.94	0.053	0.76	-0.96	0.34	0.94	-0.63	0.53	0.89
CMTM5	-1.94	0.053	0.76	-1.58	0.11	0.88	1.17	0.24	0.74
COMMD3	1.94	0.053	0.76	0.87	0.38	0.95	0.49	0.63	0.92
HFM1	-1.93	0.053	0.76	0.72	0.47	0.96	1.69	0.092	0.57
IL10	1.94	0.053	0.76	-1.21	0.23	0.93	-0.32	0.75	0.95
KANK1	1.94	0.053	0.76	-0.3	0.76	0.98	-1.9	0.057	0.51
MTF1	-1.94	0.053	0.76	0.48	0.63	0.97	-1.24	0.21	0.72
MYADML2	1.94	0.053	0.76	-1.22	0.22	0.93	-2.24	0.026	0.41
NFIL3	1.94	0.053	0.76	2.12	0.034	0.77	-2.05	0.041	0.46
PBXIP1	-1.94	0.053	0.76	-0.08	0.94	1	0.98	0.33	0.8
RAVER1	-1.94	0.053	0.76	0.1	0.92	0.99	1.18	0.24	0.74
TTC27	-1.94	0.053	0.76	2.03	0.042	0.79	-1.67	0.096	0.58
TYW5	-1.94	0.053	0.76	0.02	0.99	1	2.17	0.03	0.43
USF2	1.94	0.053	0.76	1.01	0.31	0.94	-0.75	0.45	0.86
ZNF705B	1.94	0.053	0.76	-0.29	0.77	0.98	-0.57	0.57	0.9
ZXDC	-1.94	0.053	0.76	0.28	0.78	0.98	0.44	0.66	0.93
ANKLE1	1.93	0.054	0.76	-1.23	0.22	0.93	-2.9	0.0038	0.22
ARL1	1.93	0.054	0.76	-0.7	0.49	0.96	0.12	0.9	0.99
CDYL	-1.93	0.054	0.76	1.26	0.21	0.92	1.46	0.15	0.65
CEP162	-1.93	0.054	0.76	0.44	0.66	0.97	2.49	0.013	0.34
CNKSR2	1.93	0.054	0.76	0.35	0.73	0.98	0.41	0.68	0.94
CTTNBP2NL	-1.93	0.054	0.76	-0.16	0.88	0.99	0.33	0.74	0.95
DAZAP2	-1.93	0.054	0.76	-1.2	0.23	0.93	2.04	0.042	0.46
GCSAML	1.93	0.054	0.76	0.45	0.65	0.97	-1.12	0.26	0.76
INTS8	-1.93	0.054	0.76	-0.17	0.86	0.99	1.42	0.16	0.66
LDLRAP1	-1.93	0.054	0.76	-0.35	0.72	0.98	-0.42	0.68	0.94
MET	1.93	0.054	0.76	0.55	0.58	0.97	-1.69	0.092	0.57
MFSD3	1.93	0.054	0.76	0.91	0.36	0.95	-0.8	0.43	0.85
OR7G1	1.93	0.054	0.76	-1.35	0.18	0.91	-0.39	0.69	0.94
P2RX5	1.93	0.054	0.76	-0.2	0.84	0.99	-2.22	0.027	0.42
PHLDB3	1.93	0.054	0.76	1.4	0.16	0.91	-0.68	0.49	0.88
QPCTL	1.93	0.054	0.76	-1.7	0.09	0.85	-1.54	0.12	0.62
RFC3	-1.93	0.054	0.76	1.84	0.066	0.82	0.02	0.98	1
RHOA	1.93	0.054	0.76	-0.09	0.93	0.99	-1.38	0.17	0.67
SFTPD	-1.93	0.054	0.76	-0.75	0.45	0.96	1.81	0.07	0.53
SLC17A4	-1.93	0.054	0.76	0.48	0.63	0.97	0.07	0.95	0.99
TOR1AIP1	1.93	0.054	0.76	-0.25	0.8	0.99	0.47	0.64	0.93
TTN	-1.93	0.054	0.76	0.71	0.48	0.96	2.88	0.004	0.23
UBE2D3	1.93	0.054	0.76	1.22	0.22	0.93	2.54	0.011	0.32
ABHD5	-1.92	0.055	0.76	-0.56	0.58	0.97	2.08	0.038	0.46
ATL3	1.92	0.055	0.76	0.12	0.9	0.99	-1.35	0.18	0.68
CENPS	-1.92	0.055	0.76	-2.2	0.028	0.77	0.43	0.67	0.93
CYP11B1	1.92	0.055	0.76	-1.35	0.18	0.91	0.41	0.68	0.94
DAZL	-1.93	0.055	0.76	-1.19	0.24	0.93	3.41	0.00068	0.11
DNAJC2	-1.93	0.055	0.76	-1.68	0.093	0.86	2.02	0.043	0.47
FOXI2	1.92	0.055	0.76	-0.86	0.39	0.95	-0.2	0.84	0.97
GABRD	-1.92	0.055	0.76	-1.14	0.26	0.93	-0.2	0.84	0.97
IRAK3	1.92	0.055	0.76	-1.81	0.071	0.83	-1.09	0.28	0.76
JPH1	-1.93	0.055	0.76	0.32	0.75	0.98	0.11	0.91	0.99
KLF7	-1.93	0.055	0.76	-0.15	0.88	0.99	1.65	0.099	0.58
MAGEH1	1.92	0.055	0.76	0.51	0.61	0.97	-0.25	0.8	0.97
MAP3K4	-1.92	0.055	0.76	0.69	0.49	0.96	0.11	0.91	0.99
MYADM	1.92	0.055	0.76	-0.41	0.68	0.98	-0.46	0.65	0.93
NDUFA5	1.92	0.055	0.76	-0.05	0.96	1	2.09	0.037	0.46
OR52J3	1.92	0.055	0.76	-0.95	0.34	0.94	-0.92	0.36	0.81
OR5T1	1.93	0.055	0.76	-2.52	0.012	0.69	1.16	0.24	0.74
PAGE1	1.92	0.055	0.76	2.14	0.033	0.77	-1.73	0.084	0.56
PPAT	-1.92	0.055	0.76	-0.46	0.65	0.97	0.94	0.35	0.81
SCUBE3	-1.92	0.055	0.76	1.29	0.2	0.92	-0.52	0.6	0.92
SDC1	-1.92	0.055	0.76	0.1	0.92	0.99	1.64	0.1	0.59
SH3BP5L	1.92	0.055	0.76	-3.07	0.0022	0.54	-0.62	0.53	0.89
SLCO6A1	-1.93	0.055	0.76	-1.15	0.25	0.93	0.32	0.75	0.95
SPATS1	-1.92	0.055	0.76	-0.02	0.98	1	-0.28	0.78	0.96
STIM2	1.92	0.055	0.76	-0.34	0.74	0.98	-0.44	0.66	0.93
TDRD7	1.92	0.055	0.76	1.83	0.068	0.82	-1.74	0.083	0.55
ZNF248	1.92	0.055	0.76	0.73	0.47	0.96	0.76	0.45	0.86
ZNF266	1.92	0.055	0.76	0.69	0.49	0.96	-1.22	0.22	0.73
ZNF534	1.92	0.055	0.76	-1.12	0.26	0.93	-0.67	0.5	0.88
ZNF845	1.92	0.055	0.76	-1.25	0.21	0.92	-1.11	0.27	0.76
ABCC5	-1.91	0.056	0.76	0.08	0.93	1	2.59	0.0099	0.31
CDKL1	1.91	0.056	0.76	-0.63	0.53	0.96	-1.5	0.14	0.63
DHRS13	1.92	0.056	0.76	-0.47	0.64	0.97	-0.97	0.33	0.8
EEF1D	1.91	0.056	0.76	-0.26	0.79	0.98	0.44	0.66	0.93
ERCC4	1.91	0.056	0.76	-0.6	0.55	0.97	2.21	0.027	0.42
FIBP	1.91	0.056	0.76	-0.3	0.76	0.98	-1.08	0.28	0.76
GINS3	-1.91	0.056	0.76	-1.34	0.18	0.91	2.3	0.022	0.4
MTG1	-1.92	0.056	0.76	1.84	0.066	0.82	-0.76	0.45	0.86
MYF5	-1.92	0.056	0.76	0.34	0.74	0.98	1.15	0.25	0.75
NGFR	1.91	0.056	0.76	0.2	0.84	0.99	-1.48	0.14	0.64
PLPBP	1.92	0.056	0.76	1.73	0.084	0.85	0.21	0.84	0.97
PRSS48	-1.91	0.056	0.76	0.42	0.68	0.98	0.74	0.46	0.87
SCYL1	1.91	0.056	0.76	1.15	0.25	0.93	-1.11	0.27	0.76
SEMA4D	1.91	0.056	0.76	-0.3	0.77	0.98	-0.41	0.68	0.94
TENT5B	-1.92	0.056	0.76	-0.51	0.61	0.97	1.28	0.2	0.71
TTF2	-1.92	0.056	0.76	0.43	0.67	0.97	1.85	0.065	0.53
ZC3H13	-1.91	0.056	0.76	-1.11	0.27	0.93	-0.93	0.35	0.81
ACE2	-1.9	0.057	0.77	-0.36	0.72	0.98	0.64	0.52	0.89
ATP8B4	-1.91	0.057	0.76	1.67	0.096	0.86	0.75	0.46	0.86
BCL2L11	1.91	0.057	0.76	1.54	0.12	0.89	-0.82	0.41	0.84
CLEC7A	-1.91	0.057	0.76	0.38	0.71	0.98	0.64	0.52	0.89
DACT1	-1.9	0.057	0.76	0.91	0.36	0.95	-0.55	0.58	0.91
DHH	1.9	0.057	0.76	0.56	0.57	0.97	-1.8	0.072	0.54
FAM83D	1.9	0.057	0.76	0.3	0.76	0.98	0.16	0.88	0.98
MMP7	-1.9	0.057	0.77	-0.13	0.9	0.99	0.47	0.64	0.93
MOB1B	-1.91	0.057	0.76	-1.18	0.24	0.93	1.93	0.055	0.5
NKAPL	-1.9	0.057	0.76	0.12	0.9	0.99	0.26	0.8	0.97
OR5J2	1.9	0.057	0.76	0.34	0.74	0.98	-0.67	0.51	0.88
PAX1	-1.91	0.057	0.76	-2.32	0.021	0.73	1.73	0.084	0.56
PCNT	1.9	0.057	0.76	0.54	0.59	0.97	-0.08	0.94	0.99
PSMD13	1.9	0.057	0.76	-1.8	0.073	0.83	0.69	0.49	0.88
RAB21	-1.91	0.057	0.76	-1.73	0.084	0.85	1.43	0.15	0.66
RCC1	-1.91	0.057	0.76	0.03	0.98	1	-0.22	0.83	0.97
SLC2A4RG	1.91	0.057	0.76	-1.11	0.27	0.93	-0.81	0.42	0.85
SLC45A3	-1.91	0.057	0.76	-0.73	0.47	0.96	1.39	0.17	0.67
TXNDC12	-1.91	0.057	0.76	-0.44	0.66	0.97	1.44	0.15	0.65
ACTR5	-1.9	0.058	0.77	-0.53	0.6	0.97	1.5	0.13	0.63
AFF1	1.9	0.058	0.77	0.2	0.84	0.99	-2.77	0.0058	0.26
C3orf33	-1.9	0.058	0.77	-1.13	0.26	0.93	-0.28	0.78	0.96
CYP2J2	-1.9	0.058	0.77	-1.15	0.25	0.93	1.15	0.25	0.75
ENO3	-1.9	0.058	0.77	-0.11	0.91	0.99	1.93	0.053	0.5
FGGY	-1.9	0.058	0.77	1.13	0.26	0.93	-0.15	0.88	0.98
FZD9	1.9	0.058	0.77	0.34	0.73	0.98	-1.24	0.22	0.72
GPR88	-1.9	0.058	0.77	1.97	0.049	0.8	-0.92	0.36	0.81
HSD17B13	-1.9	0.058	0.77	0.46	0.64	0.97	2.68	0.0075	0.29
OR2T27	1.9	0.058	0.77	-0.73	0.46	0.96	-0.32	0.75	0.95
PPWD1	-1.9	0.058	0.77	-1	0.32	0.94	-0.09	0.93	0.99
SCHIP1	-1.9	0.058	0.77	0.7	0.48	0.96	1.21	0.23	0.73
SMC3	1.9	0.058	0.77	0.07	0.95	1	-1.3	0.19	0.7
ARMC12	-1.89	0.059	0.77	-0.11	0.91	0.99	0.6	0.55	0.9
C12orf65	-1.89	0.059	0.77	0.17	0.86	0.99	0.42	0.67	0.93
C2orf69	1.89	0.059	0.77	-0.95	0.34	0.94	0.18	0.86	0.98
CERCAM	1.89	0.059	0.77	0.39	0.7	0.98	-2.11	0.036	0.45
CYP19A1	-1.89	0.059	0.77	0.48	0.63	0.97	-0.24	0.81	0.97
CYP2B6	1.89	0.059	0.77	-0.44	0.66	0.97	-1.25	0.21	0.72
FBXL5	-1.89	0.059	0.77	0.39	0.69	0.98	1.03	0.3	0.78
FCRL5	-1.9	0.059	0.77	-0.11	0.91	0.99	2.16	0.031	0.43
FSIP1	-1.89	0.059	0.77	0.94	0.35	0.94	1.71	0.088	0.57
GJB4	-1.89	0.059	0.77	0.79	0.43	0.96	-0.05	0.96	0.99
IMPG1	1.89	0.059	0.77	0.22	0.83	0.99	0.61	0.54	0.9
JUNB	1.89	0.059	0.77	-0.65	0.52	0.96	-1.56	0.12	0.61
KRTAP6-2	1.89	0.059	0.77	-0.55	0.58	0.97	-0.86	0.39	0.83
LCE3C	1.89	0.059	0.77	-0.74	0.46	0.96	-1.38	0.17	0.67
LPL	-1.89	0.059	0.77	0.99	0.32	0.94	1	0.32	0.79
LY6G6D	-1.89	0.059	0.77	1.37	0.17	0.91	0.02	0.98	1
MMP21	1.89	0.059	0.77	-0.76	0.44	0.96	0.28	0.78	0.96
MTOR	1.89	0.059	0.77	0.97	0.33	0.94	-1.47	0.14	0.64
NIM1K	-1.89	0.059	0.77	-1.16	0.25	0.93	0.56	0.58	0.91
NRBF2	-1.89	0.059	0.77	0.84	0.4	0.95	1	0.32	0.79
NUDT16	1.89	0.059	0.77	-1.62	0.11	0.87	0.06	0.95	0.99
OGT	-1.89	0.059	0.77	-1.95	0.051	0.81	1.55	0.12	0.61
PFDN5	1.89	0.059	0.77	1	0.32	0.94	-0.82	0.41	0.84
PPP1CC	1.89	0.059	0.77	0.03	0.98	1	-0.7	0.49	0.88
SGCG	-1.89	0.059	0.77	-1.54	0.13	0.89	2.56	0.011	0.31
SUSD1	1.89	0.059	0.77	0.19	0.85	0.99	-1.28	0.2	0.71
TPP2	-1.89	0.059	0.77	0.3	0.76	0.98	1.32	0.19	0.69
ZNF326	-1.89	0.059	0.77	-1.34	0.18	0.91	-1.68	0.094	0.57
ZNF488	-1.89	0.059	0.77	1.79	0.074	0.84	0.03	0.97	1
AR	1.89	0.06	0.77	-0.99	0.32	0.94	0.29	0.77	0.96
ATP5MC3	-1.88	0.06	0.77	0.75	0.45	0.96	1.76	0.078	0.55
CD80	1.88	0.06	0.77	-0.72	0.47	0.96	-0.77	0.44	0.86
EFNA2	1.88	0.06	0.77	-0.58	0.56	0.97	-0.66	0.51	0.88
FEN1	-1.89	0.06	0.77	0.44	0.66	0.97	0.35	0.73	0.95
LPCAT2	-1.88	0.06	0.77	0.94	0.35	0.94	0.91	0.37	0.82
NUDT21	-1.88	0.06	0.77	-1	0.32	0.94	2.97	0.0031	0.21
PGBD1	-1.88	0.06	0.77	0.93	0.35	0.95	0.7	0.48	0.88
PHACTR3	1.89	0.06	0.77	-0.49	0.63	0.97	-0.25	0.8	0.97
POLD3	-1.88	0.06	0.77	0.57	0.57	0.97	1.12	0.26	0.76
RAMAC	-1.88	0.06	0.77	0.02	0.99	1	-0.81	0.42	0.85
RTKN2	-1.89	0.06	0.77	-1.24	0.22	0.93	1.19	0.23	0.74
SEMA3A	1.88	0.06	0.77	0.51	0.61	0.97	0.83	0.41	0.84
SERPINA6	-1.89	0.06	0.77	0.13	0.9	0.99	-2.04	0.042	0.46
SFMBT2	1.88	0.06	0.77	-2.49	0.013	0.7	0.75	0.45	0.86
TNFSF9	1.88	0.06	0.77	-1.23	0.22	0.93	-1.04	0.3	0.78
TNIP3	-1.89	0.06	0.77	0.13	0.9	0.99	1.96	0.05	0.49
TSGA10	-1.88	0.06	0.77	0.45	0.65	0.97	1.96	0.05	0.49
UBE2D2	1.89	0.06	0.77	0.14	0.89	0.99	-0.79	0.43	0.85
ZBTB7B	-1.88	0.06	0.77	0.53	0.6	0.97	0.97	0.33	0.8
ZNF333	1.89	0.06	0.77	-0.39	0.69	0.98	-0.9	0.37	0.82
ACTR1A	1.88	0.061	0.77	1.49	0.14	0.89	-1.96	0.051	0.49
AMBN	-1.88	0.061	0.77	-0.49	0.63	0.97	2.06	0.04	0.46
CABP1	-1.88	0.061	0.77	0.2	0.84	0.99	-1.7	0.089	0.57
CD96	-1.88	0.061	0.77	-0.31	0.76	0.98	2.3	0.022	0.39
DEPDC7	-1.87	0.061	0.77	0.77	0.44	0.96	0.9	0.37	0.82
EIF3J	1.87	0.061	0.77	-0.82	0.41	0.95	0.43	0.67	0.93
ERGIC3	-1.88	0.061	0.77	1.69	0.091	0.85	-0.12	0.91	0.99
IL31	-1.88	0.061	0.77	0.85	0.39	0.95	-2.15	0.032	0.43
IPO9	1.88	0.061	0.77	1.55	0.12	0.88	0.37	0.71	0.94
KCNK3	1.88	0.061	0.77	1.4	0.16	0.91	-1.58	0.11	0.61
KRTAP4-9	1.88	0.061	0.77	-1.94	0.053	0.82	-0.77	0.44	0.86
MGLL	-1.88	0.061	0.77	-1.22	0.22	0.93	-0.03	0.97	1
MNAT1	-1.87	0.061	0.77	1.87	0.062	0.82	-0.75	0.45	0.86
PABPC3	-1.88	0.061	0.77	0.36	0.72	0.98	0.66	0.51	0.88
PCDHB3	-1.87	0.061	0.77	-0.07	0.95	1	0.91	0.37	0.82
PDHA2	1.88	0.061	0.77	-0.86	0.39	0.95	-0.88	0.38	0.83
SIPA1L3	1.88	0.061	0.77	2.27	0.023	0.73	-2.84	0.0047	0.24
SLC44A3	-1.87	0.061	0.77	-0.95	0.34	0.94	0.2	0.84	0.97
SNX25	-1.88	0.061	0.77	-0.52	0.61	0.97	3.39	0.00073	0.11
SORCS3	1.87	0.061	0.77	-0.63	0.53	0.96	-0.97	0.33	0.8
SQSTM1	1.87	0.061	0.77	-0.79	0.43	0.96	0.19	0.85	0.97
TMEM237	-1.88	0.061	0.77	0.37	0.71	0.98	1.69	0.092	0.57
AHDC1	-1.87	0.062	0.77	0.44	0.66	0.97	-1.04	0.3	0.78
BEND4	-1.87	0.062	0.77	0.57	0.57	0.97	0.19	0.85	0.97
CDR1	1.87	0.062	0.77	0.77	0.44	0.96	-0.92	0.36	0.81
CKM	1.87	0.062	0.77	-0.18	0.86	0.99	-1.17	0.24	0.74
DHX40	-1.87	0.062	0.77	-2.13	0.033	0.77	-0.71	0.48	0.87
ELOVL7	-1.87	0.062	0.77	0.15	0.88	0.99	0.76	0.44	0.86
FBXL7	-1.87	0.062	0.77	0.3	0.77	0.98	0.36	0.72	0.95
GJA1	-1.87	0.062	0.77	-0.54	0.59	0.97	0.7	0.49	0.88
HYAL3	-1.87	0.062	0.77	2.22	0.027	0.77	0.23	0.81	0.97
IL1RL1	1.87	0.062	0.77	1.13	0.26	0.93	0.45	0.65	0.93
MRPS18A	-1.87	0.062	0.77	2.07	0.039	0.78	-0.51	0.61	0.92
PCBP1	1.87	0.062	0.77	-0.75	0.45	0.96	-1.57	0.12	0.61
PLPP6	1.87	0.062	0.77	1.3	0.19	0.92	-2.09	0.037	0.46
RAB31	-1.87	0.062	0.77	-0.57	0.57	0.97	1.73	0.085	0.56
RFC2	-1.87	0.062	0.77	0.16	0.87	0.99	-2.75	0.006	0.26
STK35	1.87	0.062	0.77	-1.12	0.26	0.93	-0.18	0.85	0.98
TRMT61B	1.87	0.062	0.77	-0.24	0.81	0.99	-1.24	0.22	0.72
TRPM4	1.87	0.062	0.77	0.24	0.81	0.99	-1.35	0.18	0.68
TXLNA	-1.87	0.062	0.77	0.99	0.32	0.94	-1.39	0.16	0.67
VN1R4	1.87	0.062	0.77	0.37	0.71	0.98	-0.59	0.56	0.9
AHRR	-1.86	0.063	0.77	2.2	0.028	0.77	2.56	0.011	0.31
C9orf129	1.86	0.063	0.77	1.04	0.3	0.94	-1.63	0.1	0.59
CES5A	-1.86	0.063	0.77	0.98	0.33	0.94	0.12	0.91	0.99
DDX54	-1.86	0.063	0.77	0.18	0.86	0.99	0.42	0.67	0.93
GAA	1.86	0.063	0.77	-2.17	0.03	0.77	-0.9	0.37	0.82
GATA1	1.86	0.063	0.77	0.84	0.4	0.95	-2.82	0.005	0.25
GJD2	1.86	0.063	0.77	-0.65	0.52	0.96	-2.35	0.019	0.38
KCTD19	-1.86	0.063	0.77	0	1	1	-0.88	0.38	0.83
KRTAP19-2	-1.87	0.063	0.77	-0.27	0.79	0.98	0.83	0.41	0.84
MFSD1	-1.87	0.063	0.77	-0.57	0.57	0.97	2.58	0.01	0.31
OR2A4	-1.86	0.063	0.77	-0.2	0.84	0.99	-0.47	0.64	0.93
RAMP2	1.86	0.063	0.77	1.13	0.26	0.93	-1.61	0.11	0.6
SERPINF2	1.86	0.063	0.77	-1.02	0.31	0.94	-2.23	0.026	0.41
SLC25A16	1.86	0.063	0.77	-1.65	0.099	0.86	0.21	0.84	0.97
SRP72	1.86	0.063	0.77	0.97	0.33	0.94	-0.49	0.62	0.92
TH	-1.86	0.063	0.77	-0.88	0.38	0.95	-0.96	0.34	0.8
ALKBH8	-1.86	0.064	0.77	-0.4	0.69	0.98	2.45	0.014	0.35
ALPL	-1.85	0.064	0.77	0.96	0.34	0.94	-1.36	0.18	0.68
BRAT1	1.86	0.064	0.77	-0.33	0.74	0.98	1.21	0.23	0.73
BTNL3	-1.85	0.064	0.77	1.54	0.12	0.88	-0.12	0.91	0.99
C1orf194	-1.86	0.064	0.77	0.53	0.6	0.97	-2.21	0.028	0.42
CLDN4	1.85	0.064	0.77	0.99	0.32	0.94	-0.1	0.92	0.99
CNOT3	1.86	0.064	0.77	-0.43	0.67	0.97	1.58	0.11	0.61
DFFB	1.86	0.064	0.77	-0.28	0.78	0.98	-0.54	0.59	0.91
DNM3	-1.85	0.064	0.77	-0.1	0.92	0.99	1.18	0.24	0.74
DUSP13	-1.85	0.064	0.77	1.14	0.25	0.93	0.54	0.59	0.91
GLIS3	1.85	0.064	0.77	0.11	0.92	0.99	0.46	0.64	0.93
GMNN	1.85	0.064	0.77	1.04	0.3	0.94	-2.06	0.04	0.46
HOXA7	-1.86	0.064	0.77	1.26	0.21	0.92	0.74	0.46	0.87
KRT6B	1.85	0.064	0.77	-0.98	0.33	0.94	-0.13	0.9	0.98
MRPL21	-1.85	0.064	0.77	2.02	0.044	0.8	-1.45	0.15	0.65
MUC7	-1.86	0.064	0.77	-0.09	0.93	1	0.13	0.89	0.98
NEK1	1.86	0.064	0.77	0.77	0.44	0.96	-1.01	0.31	0.79
OR1A1	1.86	0.064	0.77	0.51	0.61	0.97	-1.77	0.078	0.55
OR6S1	-1.86	0.064	0.77	1.95	0.051	0.81	0.04	0.97	0.99
PRDX4	1.86	0.064	0.77	-0.08	0.94	1	0.95	0.34	0.8
SETD7	-1.86	0.064	0.77	0.19	0.85	0.99	0.11	0.91	0.99
STPG3	1.86	0.064	0.77	1.88	0.061	0.82	-1.47	0.14	0.64
TMEM44	-1.86	0.064	0.77	1.56	0.12	0.88	1.51	0.13	0.63
TMPRSS4	-1.86	0.064	0.77	0.19	0.85	0.99	0.4	0.69	0.94
VILL	1.85	0.064	0.77	0.84	0.4	0.95	-2.46	0.014	0.35
ZNF587B	1.85	0.064	0.77	-3.05	0.0024	0.55	-1.41	0.16	0.66
ARTN	1.85	0.065	0.77	0.74	0.46	0.96	-0.86	0.39	0.83
BCAS4	1.85	0.065	0.77	-0.33	0.75	0.98	-0.52	0.6	0.92
BEX5	-1.85	0.065	0.77	-0.89	0.37	0.95	0.1	0.92	0.99
BID	1.85	0.065	0.77	-1.17	0.24	0.93	0.76	0.45	0.86
BPIFB6	-1.85	0.065	0.77	-0.41	0.68	0.98	2.12	0.034	0.44
CDC25B	1.85	0.065	0.77	-1.39	0.17	0.91	-1.79	0.073	0.54
CDKN2AIP	-1.85	0.065	0.77	0.22	0.83	0.99	1.92	0.055	0.51
CFHR5	-1.85	0.065	0.77	-0.11	0.91	0.99	1.58	0.11	0.6
CYP46A1	-1.85	0.065	0.77	1.33	0.19	0.91	-1.08	0.28	0.77
DPT	-1.85	0.065	0.77	0.16	0.88	0.99	0.53	0.6	0.92
ESCO2	1.85	0.065	0.77	-0.93	0.35	0.95	-0.89	0.37	0.82
GAL	1.85	0.065	0.77	1.16	0.25	0.93	-1.73	0.084	0.56
GLIPR1L2	-1.85	0.065	0.77	-0.89	0.37	0.95	2.09	0.037	0.46
GPR1	-1.85	0.065	0.77	1.55	0.12	0.88	-0.63	0.53	0.89
HSPA6	-1.85	0.065	0.77	0.07	0.95	1	2.16	0.031	0.43
LIMS1	1.85	0.065	0.77	1.41	0.16	0.9	-0.39	0.69	0.94
OR52W1	-1.85	0.065	0.77	-1.85	0.065	0.82	2.66	0.0081	0.29
OR6C4	1.85	0.065	0.77	0	1	1	-1.68	0.093	0.57
PRAG1	-1.85	0.065	0.77	-0.68	0.5	0.96	-0.44	0.66	0.93
RFX8	1.85	0.065	0.77	1.04	0.3	0.94	-1.81	0.071	0.54
RPS9	1.85	0.065	0.77	-0.48	0.63	0.97	-0.74	0.46	0.87
SLC22A4	1.85	0.065	0.77	1.04	0.3	0.94	-2.13	0.033	0.44
TNNC2	1.85	0.065	0.77	-0.33	0.74	0.98	0.86	0.39	0.83
ACTRT1	1.84	0.066	0.77	-1.08	0.28	0.94	-0.91	0.36	0.82
AURKC	1.84	0.066	0.77	1.12	0.27	0.93	-1.99	0.047	0.48
C1orf68	1.84	0.066	0.77	-1.52	0.13	0.89	-0.35	0.73	0.95
CACNA1E	1.84	0.066	0.77	-0.1	0.92	0.99	-1.68	0.093	0.57
CDC42EP2	1.84	0.066	0.77	-0.8	0.42	0.95	-2.56	0.011	0.31
CIAO1	-1.84	0.066	0.77	1.29	0.2	0.92	0.06	0.95	0.99
CRCP	-1.84	0.066	0.77	-0.47	0.64	0.97	0.25	0.81	0.97
CYREN	1.84	0.066	0.77	-0.77	0.44	0.96	0.51	0.61	0.92
DRAP1	1.84	0.066	0.77	1.1	0.27	0.93	-0.26	0.79	0.96
FAM172A	-1.84	0.066	0.77	-0.8	0.42	0.95	1.79	0.074	0.54
KRTAP10-9	1.84	0.066	0.77	-1.34	0.18	0.91	0.1	0.92	0.99
NEURL2	1.84	0.066	0.77	-0.17	0.86	0.99	-1.73	0.084	0.56
RBMS1	1.84	0.066	0.77	2.83	0.0048	0.62	1.33	0.18	0.69
RD3L	-1.84	0.066	0.77	0.29	0.77	0.98	-0.04	0.97	0.99
RPL9	1.84	0.066	0.77	0.32	0.75	0.98	1.45	0.15	0.65
SH3PXD2B	1.84	0.066	0.77	-0.06	0.95	1	-2.01	0.044	0.47
SMKR1	-1.84	0.066	0.77	0.81	0.42	0.95	-0.13	0.9	0.98
TSPAN5	-1.84	0.066	0.77	-0.63	0.53	0.96	-0.11	0.91	0.99
ABCB9	-1.83	0.067	0.77	0.33	0.74	0.98	-1.95	0.051	0.49
C1QA	-1.83	0.067	0.77	-0.35	0.72	0.98	0.41	0.69	0.94
CDKN1A	-1.83	0.067	0.77	-0.55	0.58	0.97	-5.63	2.7e-08	6.1e-05
CNTNAP3B	1.83	0.067	0.77	1.98	0.048	0.8	-2.96	0.0032	0.21
GNB4	-1.83	0.067	0.77	-1.66	0.097	0.86	0.21	0.83	0.97
KLC3	1.83	0.067	0.77	1.27	0.2	0.92	-0.23	0.82	0.97
RNASE7	-1.83	0.067	0.77	-0.63	0.53	0.96	0.75	0.45	0.86
SHPRH	-1.84	0.067	0.77	-0.31	0.76	0.98	2.57	0.01	0.31
SLIT2	-1.83	0.067	0.77	0.19	0.85	0.99	0.98	0.33	0.8
SPDYE1	1.84	0.067	0.77	0.74	0.46	0.96	-0.61	0.54	0.89
TAF11	-1.83	0.067	0.77	-0.66	0.51	0.96	-0.04	0.97	0.99
TCL1B	-1.84	0.067	0.77	0.8	0.42	0.95	-0.39	0.69	0.94
TIMD4	1.84	0.067	0.77	0.95	0.34	0.94	-1.05	0.3	0.78
TPCN1	-1.83	0.067	0.77	0.45	0.65	0.97	-0.35	0.73	0.95
VAPA	-1.84	0.067	0.77	-0.97	0.33	0.94	1.24	0.22	0.72
ZDHHC4	1.84	0.067	0.77	0.49	0.63	0.97	1.02	0.31	0.78
ZNF282	-1.83	0.067	0.77	0.95	0.34	0.94	0.57	0.57	0.9
ZNF70	1.84	0.067	0.77	-2.15	0.032	0.77	-2.29	0.022	0.4
AMPD3	-1.83	0.068	0.77	0.35	0.73	0.98	0.34	0.73	0.95
ATP6V1B1	-1.83	0.068	0.77	0.18	0.85	0.99	0.38	0.7	0.94
C8orf86	1.83	0.068	0.77	-1.55	0.12	0.88	-1.03	0.3	0.78
C9orf85	1.83	0.068	0.77	0.63	0.53	0.96	-1.68	0.093	0.57
CATSPERG	1.83	0.068	0.77	1.51	0.13	0.89	-1.06	0.29	0.77
CT83	1.83	0.068	0.77	-0.86	0.39	0.95	0.77	0.44	0.86
DISP1	1.83	0.068	0.77	-1.18	0.24	0.93	-0.59	0.55	0.9
EFL1	1.83	0.068	0.77	-0.79	0.43	0.96	-0.49	0.62	0.92
FBXL6	1.83	0.068	0.77	-0.86	0.39	0.95	-0.63	0.53	0.89
ITFG2	1.83	0.068	0.77	-0.46	0.65	0.97	-0.44	0.66	0.93
KCNE2	-1.83	0.068	0.77	-2.13	0.034	0.77	0.38	0.71	0.94
MIGA2	1.83	0.068	0.77	2.27	0.024	0.73	-2.82	0.0049	0.25
PFKM	-1.83	0.068	0.77	0.05	0.96	1	-0.79	0.43	0.85
QSOX1	1.83	0.068	0.77	-1.55	0.12	0.88	-0.72	0.47	0.87
RNF168	-1.83	0.068	0.77	0.65	0.51	0.96	-0.79	0.43	0.85
SCUBE1	-1.83	0.068	0.77	0.1	0.92	0.99	0.09	0.93	0.99
SNX14	-1.83	0.068	0.77	1.12	0.26	0.93	0.78	0.43	0.85
TAF5L	1.83	0.068	0.77	-0.83	0.41	0.95	-1.09	0.28	0.76
TFDP2	-1.83	0.068	0.77	-1.44	0.15	0.9	1.07	0.28	0.77
VPS35L	1.82	0.068	0.77	-1.7	0.09	0.85	-0.89	0.37	0.82
ZBTB4	-1.83	0.068	0.77	0.35	0.73	0.98	-0.76	0.44	0.86
ZC3H18	-1.83	0.068	0.77	-1.4	0.16	0.91	1.43	0.15	0.66
C16orf87	-1.82	0.069	0.77	-0.13	0.9	0.99	1.84	0.067	0.53
C19orf38	1.82	0.069	0.77	-1.27	0.2	0.92	-1.21	0.23	0.73
C2orf49	1.82	0.069	0.77	1.24	0.21	0.92	2.25	0.024	0.41
CACNA2D1	1.82	0.069	0.77	0.78	0.43	0.96	-1.74	0.082	0.55
CATSPERE	1.82	0.069	0.77	-0.67	0.5	0.96	0	1	1
DDB2	-1.82	0.069	0.77	1.23	0.22	0.93	0.95	0.34	0.8
DDX19A	-1.82	0.069	0.77	0.74	0.46	0.96	0.34	0.73	0.95
ELMOD1	-1.82	0.069	0.77	0.61	0.54	0.97	2.05	0.041	0.46
EPHX3	1.82	0.069	0.77	-0.88	0.38	0.95	-1.12	0.26	0.76
FERMT2	1.82	0.069	0.77	0.31	0.75	0.98	1.93	0.053	0.5
HDGFL3	1.82	0.069	0.77	0.21	0.83	0.99	-0.55	0.58	0.91
LRP8	-1.82	0.069	0.77	0.09	0.93	0.99	-0.5	0.62	0.92
MYL6	-1.82	0.069	0.77	0.47	0.64	0.97	0.91	0.36	0.82
NRL	-1.82	0.069	0.77	1.16	0.25	0.93	1.41	0.16	0.66
OCA2	-1.82	0.069	0.77	-0.62	0.53	0.96	1.69	0.091	0.57
SEC61G	1.82	0.069	0.77	-0.63	0.53	0.96	2.94	0.0034	0.21
SH2D1A	1.82	0.069	0.77	0.81	0.42	0.95	-2.65	0.0081	0.29
SLC1A5	1.82	0.069	0.77	-1.71	0.087	0.85	0.78	0.43	0.85
SMURF2	-1.82	0.069	0.77	0.98	0.33	0.94	-0.44	0.66	0.93
SYCP2	1.82	0.069	0.77	0.63	0.53	0.96	-0.11	0.91	0.99
TERF2	-1.82	0.069	0.77	-1.86	0.063	0.82	1.42	0.15	0.66
ABHD12	-1.81	0.07	0.77	0.74	0.46	0.96	0.99	0.32	0.79
ADGRA3	-1.82	0.07	0.77	-0.53	0.59	0.97	-0.13	0.9	0.98
AIPL1	-1.82	0.07	0.77	0.9	0.37	0.95	-0.46	0.65	0.93
C2orf73	-1.82	0.07	0.77	-0.94	0.35	0.95	1.47	0.14	0.64
DRD4	1.81	0.07	0.77	0.11	0.91	0.99	0.24	0.81	0.97
EFCAB7	-1.81	0.07	0.77	0.33	0.74	0.98	1.64	0.1	0.59
FCRLA	-1.82	0.07	0.77	-0.11	0.91	0.99	1.39	0.16	0.67
IFNE	1.82	0.07	0.77	1.67	0.096	0.86	1.12	0.26	0.76
KCNH8	-1.82	0.07	0.77	-0.63	0.53	0.96	0.95	0.34	0.8
KRTAP3-3	1.81	0.07	0.77	1.4	0.16	0.91	-1.65	0.1	0.58
NEDD4	-1.82	0.07	0.77	-1.24	0.22	0.93	2.56	0.011	0.31
OR6Q1	1.82	0.07	0.77	-0.42	0.68	0.98	0.48	0.63	0.92
PIWIL4	-1.82	0.07	0.77	1.75	0.081	0.85	0.79	0.43	0.85
PLEKHH3	-1.81	0.07	0.77	2.08	0.038	0.78	1.14	0.25	0.75
RBM44	1.81	0.07	0.77	1.01	0.31	0.94	1.4	0.16	0.66
RFC1	-1.82	0.07	0.77	-0.06	0.95	1	-0.29	0.77	0.96
RPAP1	-1.82	0.07	0.77	-0.93	0.35	0.95	0.33	0.74	0.95
SLC44A2	1.82	0.07	0.77	-1.11	0.27	0.93	-1.09	0.28	0.76
SVIP	1.81	0.07	0.77	-1.4	0.16	0.91	0.26	0.79	0.96
TMPRSS11F	1.82	0.07	0.77	2.19	0.029	0.77	-1.05	0.29	0.77
UBE2J1	-1.82	0.07	0.77	-1.13	0.26	0.93	1.47	0.14	0.64
WASHC2C	1.81	0.07	0.77	-0.41	0.68	0.98	-1.45	0.15	0.65
ZNF35	-1.81	0.07	0.77	-2.3	0.022	0.73	0.73	0.47	0.87
ZNF793	1.81	0.07	0.77	0.55	0.58	0.97	-0.55	0.58	0.91
ACAT1	-1.81	0.071	0.77	0.98	0.33	0.94	0.93	0.35	0.81
B4GALT7	1.81	0.071	0.77	-1.58	0.11	0.88	-0.07	0.94	0.99
CD209	-1.81	0.071	0.77	-0.02	0.99	1	-0.09	0.93	0.99
CLTC	-1.81	0.071	0.77	-1.08	0.28	0.94	0.91	0.36	0.82
CYB561D2	1.81	0.071	0.77	-1.53	0.13	0.89	-1.6	0.11	0.6
FAM209A	1.81	0.071	0.77	-1.77	0.077	0.84	0.91	0.37	0.82
LCE5A	1.81	0.071	0.77	-0.81	0.42	0.95	-0.72	0.47	0.87
MAEA	1.81	0.071	0.77	-0.97	0.33	0.94	-0.59	0.55	0.9
NDUFA4	1.81	0.071	0.77	1.38	0.17	0.91	-0.32	0.75	0.95
NEUROG2	-1.81	0.071	0.77	0.94	0.35	0.94	-1.15	0.25	0.75
PDK3	1.81	0.071	0.77	0.65	0.52	0.96	-2.25	0.025	0.41
PLA2G2A	1.81	0.071	0.77	2.47	0.014	0.71	-2.76	0.0059	0.26
PMPCB	-1.81	0.071	0.77	-1.09	0.28	0.94	1.41	0.16	0.66
PRKCA	1.81	0.071	0.77	-1.46	0.15	0.9	-0.94	0.35	0.81
PYGB	-1.81	0.071	0.77	0.47	0.64	0.97	1.85	0.065	0.53
RABAC1	1.81	0.071	0.77	-1.24	0.22	0.93	-1.54	0.12	0.62
SHISA7	1.81	0.071	0.77	-1.48	0.14	0.9	0.5	0.62	0.92
SLC22A2	1.81	0.071	0.77	-0.44	0.66	0.97	-1.7	0.089	0.57
TEX38	1.81	0.071	0.77	0.12	0.91	0.99	-1.84	0.066	0.53
TMCO1	-1.81	0.071	0.77	-0.67	0.5	0.96	4.28	2.2e-05	0.011
TMEM266	-1.81	0.071	0.77	0.23	0.82	0.99	0.79	0.43	0.85
ZNF37A	1.81	0.071	0.77	-0.52	0.6	0.97	-0.65	0.52	0.89
ZNF454	1.81	0.071	0.77	-0.9	0.37	0.95	-1.32	0.19	0.69
ZNF567	1.81	0.071	0.77	1.47	0.14	0.9	2.17	0.03	0.43
ATAD5	-1.8	0.072	0.77	-1.55	0.12	0.88	2.16	0.031	0.43
COL4A3	-1.8	0.072	0.77	1.71	0.087	0.85	0.83	0.41	0.84
CXCL16	1.8	0.072	0.77	0.17	0.87	0.99	-2.07	0.039	0.46
CYP51A1	1.8	0.072	0.77	-1.02	0.31	0.94	-0.74	0.46	0.87
DCANP1	-1.8	0.072	0.77	0.17	0.87	0.99	0.2	0.84	0.97
DCP1B	-1.8	0.072	0.77	-0.72	0.47	0.96	0.82	0.41	0.84
DDI2	-1.8	0.072	0.77	0.46	0.64	0.97	0.62	0.53	0.89
FOXE1	1.8	0.072	0.77	1.53	0.13	0.89	-2.52	0.012	0.33
HSD17B12	-1.8	0.072	0.77	-0.17	0.87	0.99	0.63	0.53	0.89
INHA	-1.8	0.072	0.77	1.73	0.084	0.85	0.39	0.7	0.94
KLK4	1.8	0.072	0.77	-0.76	0.45	0.96	-0.1	0.92	0.99
LAMTOR4	1.8	0.072	0.77	-0.9	0.37	0.95	-0.5	0.62	0.92
LSP1	-1.8	0.072	0.77	0.52	0.6	0.97	1.55	0.12	0.61
LYL1	-1.8	0.072	0.77	1.09	0.28	0.94	-0.72	0.47	0.87
NHSL1	-1.8	0.072	0.77	2.29	0.022	0.73	1.32	0.19	0.69
OR1L1	1.8	0.072	0.77	1.22	0.22	0.93	-1.11	0.27	0.76
OR6K2	-1.81	0.072	0.77	-0.68	0.49	0.96	0.16	0.87	0.98
PRMT2	-1.8	0.072	0.77	0.42	0.67	0.97	1.48	0.14	0.63
R3HDML	1.8	0.072	0.77	-1.14	0.25	0.93	0.04	0.97	0.99
RAB20	-1.8	0.072	0.77	0.5	0.62	0.97	2.04	0.041	0.46
RGS21	1.8	0.072	0.77	-2.49	0.013	0.7	0.61	0.54	0.89
SART1	1.8	0.072	0.77	-1.1	0.27	0.93	0.23	0.81	0.97
SIGMAR1	1.8	0.072	0.77	0.45	0.65	0.97	-0.75	0.45	0.86
SLC16A10	-1.8	0.072	0.77	1.19	0.24	0.93	-0.48	0.63	0.92
SLC22A10	1.8	0.072	0.77	1.28	0.2	0.92	-1.31	0.19	0.7
SPATA18	-1.8	0.072	0.77	-0.38	0.7	0.98	1.23	0.22	0.72
STXBP2	1.8	0.072	0.77	0.01	0.99	1	-2.31	0.021	0.39
TTC39C	1.8	0.072	0.77	-1.27	0.2	0.92	1.17	0.24	0.74
UNC5CL	-1.8	0.072	0.77	1.98	0.048	0.8	-1.7	0.089	0.57
ZNF77	1.8	0.072	0.77	-0.13	0.9	0.99	-0.85	0.4	0.83
C14orf119	-1.79	0.073	0.77	-1.18	0.24	0.93	0.94	0.35	0.81
CCNDBP1	-1.8	0.073	0.77	-1.68	0.094	0.86	0.33	0.74	0.95
CD6	-1.79	0.073	0.77	1.66	0.098	0.86	0.11	0.91	0.99
DENND2D	-1.8	0.073	0.77	0.79	0.43	0.96	-1.64	0.1	0.59
EARS2	-1.79	0.073	0.77	2.04	0.042	0.79	-1.6	0.11	0.6
EIF2A	-1.79	0.073	0.77	-0.87	0.38	0.95	1.02	0.31	0.78
EPHX2	1.8	0.073	0.77	-0.21	0.84	0.99	-1.25	0.21	0.72
FAM47B	1.79	0.073	0.77	-1.36	0.17	0.91	-1.8	0.072	0.54
FKBP4	-1.79	0.073	0.77	0.82	0.41	0.95	1.85	0.065	0.53
GRHL3	1.79	0.073	0.77	-0.55	0.58	0.97	-1.22	0.22	0.73
GTPBP4	1.8	0.073	0.77	-0.5	0.62	0.97	0.06	0.95	0.99
IGSF11	1.8	0.073	0.77	-0.26	0.8	0.99	0.33	0.74	0.95
ILK	1.79	0.073	0.77	0.2	0.84	0.99	0.68	0.5	0.88
KCNRG	-1.8	0.073	0.77	-0.71	0.48	0.96	1.76	0.078	0.55
NAALADL1	1.8	0.073	0.77	0.9	0.37	0.95	-0.79	0.43	0.85
POLG	-1.8	0.073	0.77	1.74	0.082	0.85	-1.14	0.26	0.75
PTBP1	1.8	0.073	0.77	1.08	0.28	0.94	-0.85	0.39	0.83
RAB27A	1.79	0.073	0.77	-0.42	0.67	0.98	-0.01	0.99	1
SKP1	-1.79	0.073	0.77	-1.09	0.28	0.94	-0.13	0.9	0.98
SLC18A1	-1.79	0.073	0.77	-0.01	0.99	1	1.45	0.15	0.65
SLC8B1	-1.8	0.073	0.77	1.12	0.26	0.93	-0.18	0.86	0.98
SNIP1	1.8	0.073	0.77	0.1	0.92	0.99	-0.79	0.43	0.85
SNX15	1.8	0.073	0.77	0.59	0.55	0.97	-4.81	1.9e-06	0.0017
VCAM1	-1.8	0.073	0.77	-0.33	0.74	0.98	0.99	0.32	0.79
ZNF462	1.8	0.073	0.77	0.68	0.5	0.96	-1.65	0.1	0.58
ZSCAN5A	-1.79	0.073	0.77	0.49	0.62	0.97	-0.26	0.8	0.97
AICDA	-1.79	0.074	0.77	-0.54	0.59	0.97	1.32	0.19	0.69
B3GAT2	-1.79	0.074	0.77	0.37	0.71	0.98	1.26	0.21	0.72
C12orf42	-1.79	0.074	0.77	0.63	0.53	0.96	0.55	0.58	0.91
CASR	-1.79	0.074	0.77	0.66	0.51	0.96	-0.47	0.64	0.93
DSTN	1.79	0.074	0.77	-1	0.32	0.94	-0.41	0.68	0.94
GPKOW	1.79	0.074	0.77	-0.7	0.48	0.96	-0.96	0.34	0.8
IGFBP7	-1.79	0.074	0.77	-0.2	0.84	0.99	0.6	0.55	0.9
LINGO4	1.79	0.074	0.77	-0.01	0.99	1	-0.22	0.83	0.97
MAK	-1.79	0.074	0.77	-1.04	0.3	0.94	1.54	0.13	0.62
MAOB	1.79	0.074	0.77	-0.81	0.42	0.95	-0.67	0.5	0.88
MEPCE	-1.79	0.074	0.77	-2.61	0.0094	0.69	-0.37	0.71	0.94
MMP13	1.79	0.074	0.77	0.75	0.46	0.96	-0.35	0.72	0.95
NKIRAS2	1.79	0.074	0.77	0.42	0.68	0.98	-2.9	0.0038	0.22
OPRD1	1.79	0.074	0.77	0.33	0.74	0.98	-2.16	0.031	0.43
OR5M10	1.79	0.074	0.77	-0.1	0.92	0.99	0.05	0.96	0.99
PCDHGA10	-1.79	0.074	0.77	0.64	0.52	0.96	0.31	0.76	0.95
PDHX	1.79	0.074	0.77	0.26	0.8	0.98	-0.99	0.32	0.8
PLPP1	1.79	0.074	0.77	0.39	0.7	0.98	-0.43	0.67	0.93
SLC38A7	-1.79	0.074	0.77	-0.26	0.8	0.99	0.44	0.66	0.93
TAF9	1.79	0.074	0.77	0.57	0.57	0.97	0.32	0.75	0.95
TAS2R41	1.79	0.074	0.77	1.08	0.28	0.94	-0.27	0.79	0.96
VWA3B	1.79	0.074	0.77	1.06	0.29	0.94	-0.83	0.4	0.84
WNT8A	-1.79	0.074	0.77	2.07	0.039	0.78	-0.68	0.5	0.88
ZNF398	-1.79	0.074	0.77	0.84	0.4	0.95	2.11	0.035	0.45
ANGPTL4	-1.78	0.075	0.77	-1.9	0.058	0.82	0.71	0.48	0.87
ARL8B	-1.78	0.075	0.77	0.42	0.67	0.97	0.74	0.46	0.87
CD52	-1.79	0.075	0.77	0.04	0.96	1	-1.63	0.1	0.59
CYP4V2	-1.78	0.075	0.77	0.75	0.46	0.96	0.81	0.42	0.85
DEFB4B	-1.79	0.075	0.77	-0.12	0.9	0.99	0.73	0.46	0.87
DIDO1	1.78	0.075	0.77	-0.3	0.76	0.98	0.52	0.6	0.92
DNMBP	-1.78	0.075	0.77	0.92	0.36	0.95	1.43	0.15	0.66
ENDOD1	-1.78	0.075	0.77	1.12	0.26	0.93	1.49	0.14	0.63
FECH	-1.78	0.075	0.77	0.24	0.81	0.99	0.27	0.79	0.96
LCN2	1.78	0.075	0.78	-0.12	0.91	0.99	-2.09	0.037	0.46
LIN7C	1.78	0.075	0.77	-1.62	0.1	0.87	-0.12	0.9	0.98
MRPS23	-1.78	0.075	0.77	2.87	0.0042	0.6	-1.11	0.27	0.76
OR5D18	1.78	0.075	0.77	0.59	0.55	0.97	0.45	0.66	0.93
PCSK2	-1.79	0.075	0.77	-1.28	0.2	0.92	2.01	0.045	0.47
PDE5A	-1.78	0.075	0.77	1.15	0.25	0.93	1.15	0.25	0.75
PRDM2	1.78	0.075	0.77	-0.18	0.86	0.99	-0.22	0.83	0.97
RPL10A	1.78	0.075	0.77	0.28	0.78	0.98	0.38	0.7	0.94
SALL3	-1.78	0.075	0.77	-2.89	0.004	0.6	1.54	0.12	0.61
SAP130	1.78	0.075	0.77	-1.45	0.15	0.9	-1.01	0.31	0.79
SKA2	1.78	0.075	0.78	0.38	0.71	0.98	1.03	0.31	0.78
SLC25A18	1.78	0.075	0.77	-0.88	0.38	0.95	-0.61	0.54	0.89
SLC25A42	1.78	0.075	0.77	1.13	0.26	0.93	-1.66	0.097	0.58
TMEM187	1.78	0.075	0.77	-0.36	0.72	0.98	-1.28	0.2	0.71
TMEM232	-1.79	0.075	0.77	0.58	0.56	0.97	1	0.32	0.79
VPS4A	-1.78	0.075	0.77	-0.11	0.92	0.99	-1.06	0.29	0.77
ZNF770	-1.78	0.075	0.77	0.5	0.62	0.97	0.54	0.59	0.91
ACIN1	1.77	0.076	0.78	0.27	0.79	0.98	-1.86	0.064	0.52
C2orf40	1.77	0.076	0.78	1.87	0.062	0.82	-1.73	0.085	0.56
CCDC166	1.78	0.076	0.78	1.35	0.18	0.91	-1.45	0.15	0.65
CDC42BPG	1.78	0.076	0.78	-1.46	0.14	0.9	-0.67	0.51	0.88
ECI2	-1.78	0.076	0.78	0.63	0.53	0.96	0.96	0.34	0.8
ETV3L	1.78	0.076	0.78	0.29	0.78	0.98	-1.16	0.24	0.74
FBXW8	-1.78	0.076	0.78	1.65	0.099	0.86	-1.06	0.29	0.77
IGSF3	1.78	0.076	0.78	0.22	0.83	0.99	-1.34	0.18	0.69
INSM1	-1.77	0.076	0.78	-1.99	0.047	0.8	1.82	0.069	0.53
NCF2	-1.78	0.076	0.78	-0.95	0.34	0.94	-0.23	0.82	0.97
NRSN1	-1.78	0.076	0.78	0.74	0.46	0.96	0.28	0.78	0.96
PILRA	1.78	0.076	0.78	-0.58	0.56	0.97	0.38	0.7	0.94
RANBP3	1.78	0.076	0.78	-0.39	0.69	0.98	-0.79	0.43	0.85
SLC20A2	1.78	0.076	0.78	1.39	0.17	0.91	0.18	0.85	0.98
TBK1	1.77	0.076	0.78	-0.02	0.98	1	0.38	0.7	0.94
TTI1	-1.77	0.076	0.78	-0.44	0.66	0.97	-0.71	0.48	0.87
ZNF679	1.78	0.076	0.78	-0.47	0.64	0.97	-0.73	0.46	0.87
CHAF1A	-1.77	0.077	0.78	-0.24	0.81	0.99	0.05	0.96	0.99
COG5	1.77	0.077	0.78	-0.7	0.49	0.96	0.61	0.54	0.89
FAM184A	-1.77	0.077	0.78	-0.55	0.58	0.97	1.36	0.17	0.68
FREM2	1.77	0.077	0.78	0.04	0.97	1	0.07	0.95	0.99
GPR137C	1.77	0.077	0.78	1.15	0.25	0.93	-0.62	0.53	0.89
GRN	-1.77	0.077	0.78	0.42	0.67	0.97	-0.05	0.96	0.99
HES2	1.77	0.077	0.78	-0.87	0.39	0.95	-2.37	0.018	0.38
HNRNPH2	-1.77	0.077	0.78	-0.67	0.5	0.96	0.65	0.52	0.89
IL17A	-1.77	0.077	0.78	1.56	0.12	0.88	0.31	0.76	0.95
IP6K1	1.77	0.077	0.78	-0.01	0.99	1	-1.54	0.12	0.61
KIF15	1.77	0.077	0.78	0.15	0.88	0.99	1.65	0.099	0.58
LPCAT3	1.77	0.077	0.78	0.79	0.43	0.96	0.04	0.97	0.99
RGS7BP	1.77	0.077	0.78	0.9	0.37	0.95	-0.16	0.88	0.98
TMEM131L	-1.77	0.077	0.78	0.25	0.8	0.99	-0.42	0.68	0.94
TMEM204	1.77	0.077	0.78	-0.94	0.35	0.94	-1.33	0.18	0.69
FLI1	-1.77	0.078	0.78	-0.17	0.86	0.99	-0.71	0.48	0.87
HABP2	1.77	0.078	0.78	-1.56	0.12	0.88	0.09	0.93	0.99
HIST1H2BF	1.76	0.078	0.78	2.01	0.045	0.8	-0.3	0.76	0.96
LRRD1	-1.77	0.078	0.78	0.64	0.52	0.96	0.2	0.84	0.97
LSM12	1.77	0.078	0.78	0.12	0.9	0.99	-0.91	0.36	0.81
NAT14	-1.76	0.078	0.78	-0.8	0.43	0.95	1.25	0.21	0.72
NDRG3	1.77	0.078	0.78	-0.94	0.35	0.94	-1.35	0.18	0.68
NOXA1	1.77	0.078	0.78	0.64	0.52	0.96	-2.43	0.015	0.36
PBDC1	1.77	0.078	0.78	-1.3	0.19	0.92	0.49	0.63	0.92
PPP1R15B	-1.76	0.078	0.78	0.56	0.57	0.97	0.26	0.79	0.96
RPL36AL	1.76	0.078	0.78	-0.11	0.91	0.99	2.34	0.019	0.38
SBF1	1.76	0.078	0.78	0.89	0.37	0.95	-1.92	0.055	0.51
SLC26A7	1.77	0.078	0.78	-0.02	0.98	1	-1.37	0.17	0.67
TNRC18	1.77	0.078	0.78	-0.28	0.78	0.98	-0.62	0.53	0.89
TUFT1	-1.77	0.078	0.78	0.03	0.98	1	0.98	0.33	0.8
WNK1	1.77	0.078	0.78	0.98	0.33	0.94	-0.91	0.36	0.82
ABHD17B	-1.76	0.079	0.78	0.01	0.99	1	1.43	0.15	0.66
AMPD1	-1.76	0.079	0.78	1.17	0.24	0.93	-0.2	0.84	0.97
CEP68	1.76	0.079	0.78	-0.94	0.35	0.94	-1.22	0.22	0.73
CHRD	-1.76	0.079	0.78	0.99	0.32	0.94	0.67	0.5	0.88
EIF3D	-1.76	0.079	0.78	-0.27	0.79	0.98	-0.31	0.76	0.95
ETFB	1.76	0.079	0.78	-1.56	0.12	0.88	-0.45	0.65	0.93
FSCN2	1.76	0.079	0.78	-0.71	0.47	0.96	-3.12	0.0019	0.18
GBP6	-1.76	0.079	0.78	0.27	0.79	0.98	-0.8	0.42	0.85
GNG11	1.76	0.079	0.78	0.17	0.87	0.99	0.23	0.82	0.97
GPR137B	-1.76	0.079	0.78	0.45	0.65	0.97	1.31	0.19	0.7
JAM2	-1.76	0.079	0.78	-1.27	0.2	0.92	1.23	0.22	0.73
LPO	1.76	0.079	0.78	-0.14	0.89	0.99	-1.41	0.16	0.66
NCAPD3	1.76	0.079	0.78	-0.73	0.47	0.96	1.91	0.057	0.51
NTN4	-1.76	0.079	0.78	1.2	0.23	0.93	-1.06	0.29	0.77
PMM1	1.76	0.079	0.78	1.07	0.28	0.94	-1.22	0.22	0.73
PRCP	-1.76	0.079	0.78	0.01	0.99	1	2.25	0.025	0.41
R3HCC1L	1.76	0.079	0.78	0.61	0.54	0.96	-0.88	0.38	0.82
RANBP9	-1.76	0.079	0.78	-0.47	0.64	0.97	-0.18	0.86	0.98
RXFP1	-1.76	0.079	0.78	-1.78	0.075	0.84	3.1	0.002	0.18
SSC4D	1.76	0.079	0.78	-0.14	0.89	0.99	-1.11	0.27	0.76
STAR	-1.76	0.079	0.78	2.61	0.0092	0.69	2.89	0.004	0.23
TEX28	1.76	0.079	0.78	0.04	0.97	1	-0.91	0.37	0.82
TMPRSS2	-1.76	0.079	0.78	-0.06	0.95	1	1.56	0.12	0.61
UBE3A	1.76	0.079	0.78	0.6	0.55	0.97	2.89	0.0039	0.23
ZNF273	1.76	0.079	0.78	-0.57	0.57	0.97	0.45	0.65	0.93
C2CD4C	1.75	0.08	0.78	0.19	0.85	0.99	-1	0.32	0.79
CALHM1	1.75	0.08	0.78	1.67	0.095	0.86	-1.87	0.061	0.52
DTNBP1	-1.75	0.08	0.78	-1.8	0.072	0.83	1.56	0.12	0.61
EEF2	1.76	0.08	0.78	-0.93	0.35	0.95	-0.36	0.72	0.94
FARS2	-1.75	0.08	0.78	0.98	0.33	0.94	-1.68	0.094	0.57
GTF2H1	-1.75	0.08	0.78	-0.89	0.38	0.95	0.65	0.52	0.89
KHNYN	-1.75	0.08	0.78	-1.36	0.17	0.91	2.03	0.043	0.47
OR2J3	-1.75	0.08	0.78	-0.27	0.79	0.98	1.66	0.097	0.58
OSBPL1A	1.75	0.08	0.78	-2.53	0.012	0.69	-0.41	0.68	0.94
PCYT1B	1.75	0.08	0.78	-0.53	0.59	0.97	-1.59	0.11	0.6
PPP1R27	1.75	0.08	0.78	-0.01	0.99	1	-2.41	0.016	0.37
PPP3CB	-1.75	0.08	0.78	0.46	0.65	0.97	0.52	0.6	0.92
RCOR2	1.75	0.08	0.78	0.44	0.66	0.97	-3.27	0.0011	0.14
SVIL	1.75	0.08	0.78	0.38	0.7	0.98	-1.11	0.27	0.76
TADA1	1.75	0.08	0.78	-0.34	0.73	0.98	-1.19	0.23	0.74
TMEM205	1.75	0.08	0.78	-0.21	0.84	0.99	-0.61	0.54	0.89
TRIB3	1.75	0.08	0.78	-1.03	0.3	0.94	-1.65	0.1	0.58
XKR4	1.75	0.08	0.78	-1.63	0.1	0.87	-0.22	0.82	0.97
XPO7	1.75	0.08	0.78	0.75	0.45	0.96	-5.88	6.3e-09	1.9e-05
ABRAXAS1	-1.75	0.081	0.79	-1.05	0.29	0.94	1.58	0.12	0.61
CCDC80	-1.75	0.081	0.78	0.58	0.56	0.97	-0.33	0.74	0.95
CCP110	1.75	0.081	0.79	0.08	0.93	1	0.78	0.43	0.85
CLEC2B	1.75	0.081	0.78	0.49	0.62	0.97	0.35	0.73	0.95
DCAF8L2	1.75	0.081	0.78	-0.47	0.64	0.97	-1.76	0.079	0.55
DCTD	-1.75	0.081	0.79	0.84	0.4	0.95	1.13	0.26	0.75
FAM218A	-1.75	0.081	0.78	-0.88	0.38	0.95	-1.88	0.06	0.51
GPC6	-1.75	0.081	0.79	-2.1	0.036	0.78	3.91	0.0001	0.032
HNRNPF	1.75	0.081	0.78	-0.57	0.57	0.97	-1.19	0.24	0.74
NRSN2	-1.75	0.081	0.79	0.86	0.39	0.95	0.9	0.37	0.82
SULT6B1	-1.75	0.081	0.78	0.85	0.39	0.95	0.74	0.46	0.87
TRMT10B	1.75	0.081	0.78	0.73	0.47	0.96	-0.39	0.7	0.94
VN1R2	1.75	0.081	0.79	0.58	0.57	0.97	-0.63	0.53	0.89
WDR38	1.74	0.081	0.79	-0.05	0.96	1	-0.45	0.65	0.93
ZGRF1	-1.75	0.081	0.78	0.15	0.88	0.99	3.07	0.0022	0.19
ZNF20	1.75	0.081	0.78	0.23	0.82	0.99	-0.68	0.5	0.88
BRS3	1.74	0.082	0.79	-0.64	0.53	0.96	-1.44	0.15	0.65
C9orf78	1.74	0.082	0.79	-1.01	0.31	0.94	-3.16	0.0017	0.17
CAB39	-1.74	0.082	0.79	-1.33	0.18	0.91	-0.7	0.48	0.88
CADM4	1.74	0.082	0.79	-0.71	0.48	0.96	0.78	0.44	0.86
CHCHD10	1.74	0.082	0.79	-0.44	0.66	0.97	-0.57	0.57	0.91
EFNB3	-1.74	0.082	0.79	0.49	0.62	0.97	-1.25	0.21	0.72
EYA2	-1.74	0.082	0.79	0.44	0.66	0.97	0.09	0.93	0.99
GLP1R	-1.74	0.082	0.79	0.1	0.92	0.99	-0.97	0.33	0.8
GPD1L	1.74	0.082	0.79	-0.79	0.43	0.96	-0.03	0.98	1
GPN1	-1.74	0.082	0.79	-0.56	0.58	0.97	1.19	0.23	0.74
HAVCR1	1.74	0.082	0.79	0.16	0.87	0.99	-1.44	0.15	0.65
MAK16	1.74	0.082	0.79	1.34	0.18	0.91	0.57	0.57	0.91
OR2AG2	-1.74	0.082	0.79	-1.35	0.18	0.91	-0.22	0.83	0.97
PDCL	1.74	0.082	0.79	0.53	0.6	0.97	-0.16	0.87	0.98
PROP1	-1.74	0.082	0.79	-0.39	0.7	0.98	-1.56	0.12	0.61
RNF144B	-1.74	0.082	0.79	-0.02	0.98	1	-0.1	0.92	0.99
SDHAF1	1.74	0.082	0.79	-1.09	0.27	0.94	-1.83	0.068	0.53
SMIM21	1.74	0.082	0.79	-0.43	0.67	0.97	0.22	0.82	0.97
SNAPC1	-1.74	0.082	0.79	2.78	0.0056	0.64	-1.55	0.12	0.61
TCAP	1.74	0.082	0.79	0.79	0.43	0.96	-1.23	0.22	0.72
VAC14	-1.74	0.082	0.79	1.27	0.21	0.92	1.23	0.22	0.72
ZNF492	1.74	0.082	0.79	-2.11	0.035	0.78	0.12	0.91	0.99
AKAP17A	1.74	0.083	0.79	-0.97	0.33	0.94	1.03	0.3	0.78
B3GAT3	1.74	0.083	0.79	0.44	0.66	0.97	-1.61	0.11	0.6
CIDEB	-1.74	0.083	0.79	0.19	0.85	0.99	0.72	0.47	0.87
CYBA	-1.74	0.083	0.79	2.45	0.015	0.71	-0.93	0.35	0.81
DGKQ	-1.73	0.083	0.79	0.92	0.36	0.95	-0.25	0.81	0.97
EML2	1.74	0.083	0.79	0.02	0.98	1	-2.7	0.0072	0.28
GCK	-1.74	0.083	0.79	1.5	0.13	0.89	-1.23	0.22	0.72
GSPT2	-1.73	0.083	0.79	-1.16	0.25	0.93	0.72	0.47	0.87
HPD	-1.73	0.083	0.79	-1.09	0.28	0.94	-0.07	0.94	0.99
IRAK1BP1	-1.74	0.083	0.79	-1.59	0.11	0.88	0.66	0.51	0.88
KCNA7	1.73	0.083	0.79	-0.09	0.93	1	-2.97	0.0031	0.21
LIG4	1.73	0.083	0.79	-1.63	0.1	0.87	2.86	0.0043	0.23
OPALIN	-1.74	0.083	0.79	-0.68	0.5	0.96	0.77	0.44	0.86
PODXL	1.74	0.083	0.79	-0.3	0.76	0.98	0.05	0.96	0.99
PRAMEF1	1.74	0.083	0.79	1.54	0.13	0.89	-1.1	0.27	0.76
PRPF18	1.74	0.083	0.79	-0.4	0.69	0.98	-0.37	0.71	0.94
RLBP1	-1.74	0.083	0.79	1.15	0.25	0.93	0.81	0.42	0.85
RNF186	-1.74	0.083	0.79	-0.31	0.76	0.98	0.65	0.52	0.89
SCARA5	1.74	0.083	0.79	-0.92	0.36	0.95	-0.93	0.35	0.81
SLC17A1	-1.74	0.083	0.79	0.06	0.95	1	0.33	0.74	0.95
SUV39H2	1.74	0.083	0.79	-0.91	0.36	0.95	0.31	0.75	0.95
ZSWIM6	-1.73	0.083	0.79	0.46	0.65	0.97	-0.5	0.62	0.92
CHORDC1	1.73	0.084	0.79	-0.09	0.93	1	-1.64	0.1	0.58
DLG5	1.73	0.084	0.79	-0.64	0.52	0.96	0.65	0.52	0.89
DRP2	1.73	0.084	0.79	-0.35	0.72	0.98	-1.15	0.25	0.75
EHD4	1.73	0.084	0.79	-0.63	0.53	0.96	-0.79	0.43	0.85
EIF2D	1.73	0.084	0.79	-0.82	0.41	0.95	-0.31	0.76	0.95
FAM153A	1.73	0.084	0.79	1.14	0.26	0.93	-0.9	0.37	0.82
HEATR6	1.73	0.084	0.79	-0.13	0.9	0.99	1.81	0.07	0.53
KLHL35	1.73	0.084	0.79	-1.74	0.083	0.85	-0.48	0.63	0.93
PLEKHG2	1.73	0.084	0.79	0.83	0.41	0.95	-0.32	0.75	0.95
PPP1R14A	1.73	0.084	0.79	1.2	0.23	0.93	-0.83	0.41	0.84
RPL37	1.73	0.084	0.79	0.07	0.95	1	0.54	0.59	0.91
SCGB1D1	1.73	0.084	0.79	-0.76	0.45	0.96	0.14	0.89	0.98
SOD2	-1.73	0.084	0.79	1.55	0.12	0.88	0.53	0.59	0.92
SOD3	-1.73	0.084	0.79	1.02	0.31	0.94	0.46	0.65	0.93
CACNG4	1.73	0.085	0.79	0.03	0.98	1	-0.85	0.39	0.83
CBLN1	1.73	0.085	0.79	-1.26	0.21	0.92	-1.39	0.16	0.67
LSM4	1.72	0.085	0.79	-1.32	0.19	0.91	-0.65	0.51	0.89
NEBL	1.72	0.085	0.79	1.06	0.29	0.94	-1.89	0.06	0.51
NIP7	-1.72	0.085	0.79	0.8	0.42	0.95	2.08	0.038	0.46
PHF1	-1.72	0.085	0.79	-0.73	0.47	0.96	-0.92	0.36	0.81
PRLH	1.73	0.085	0.79	-1.78	0.076	0.84	-2.4	0.017	0.37
PURG	1.72	0.085	0.79	0.22	0.82	0.99	-0.16	0.88	0.98
PXN	1.72	0.085	0.79	0.22	0.83	0.99	-0.25	0.8	0.97
RNF212	-1.73	0.085	0.79	-0.18	0.86	0.99	-0.13	0.9	0.98
RORB	1.73	0.085	0.79	0.45	0.65	0.97	-1.01	0.31	0.79
SAP30BP	-1.72	0.085	0.79	-0.14	0.89	0.99	-0.42	0.68	0.94
SLC25A36	-1.72	0.085	0.79	-0.48	0.63	0.97	1.74	0.082	0.55
SUCNR1	-1.72	0.085	0.79	-0.03	0.98	1	1.26	0.21	0.72
TXN	-1.72	0.085	0.79	0.75	0.46	0.96	-0.62	0.54	0.89
ZNF304	-1.72	0.085	0.79	-1.88	0.06	0.82	3.06	0.0023	0.19
ZNF497	1.72	0.085	0.8	0.92	0.36	0.95	0.21	0.83	0.97
C8A	-1.72	0.086	0.8	0.93	0.35	0.95	0.61	0.54	0.89
CANT1	1.72	0.086	0.8	-0.08	0.93	1	-1.18	0.24	0.74
CPSF6	1.72	0.086	0.8	-0.92	0.36	0.95	0.57	0.57	0.91
DLK1	-1.72	0.086	0.8	1.23	0.22	0.93	0.61	0.54	0.9
DNAJC30	1.72	0.086	0.8	0.61	0.54	0.96	-1.47	0.14	0.64
GBA	-1.72	0.086	0.8	-2.39	0.017	0.72	-0.12	0.91	0.99
GNG2	1.72	0.086	0.8	-0.31	0.76	0.98	-1.9	0.057	0.51
HSPH1	-1.72	0.086	0.8	-1.42	0.15	0.9	1.98	0.049	0.48
LAP3	-1.72	0.086	0.8	1.57	0.12	0.88	-1.15	0.25	0.75
MAD2L1BP	1.72	0.086	0.8	0.19	0.85	0.99	2.5	0.013	0.33
MED10	1.72	0.086	0.8	-0.59	0.56	0.97	-2.13	0.033	0.44
PBX2	-1.72	0.086	0.8	-0.95	0.34	0.94	-0.73	0.46	0.87
PSPH	1.72	0.086	0.8	0.15	0.88	0.99	-0.27	0.78	0.96
RTL6	1.72	0.086	0.8	1.01	0.31	0.94	0.07	0.95	0.99
SLA	-1.72	0.086	0.8	-2.7	0.0072	0.65	0.82	0.41	0.84
SYPL2	-1.72	0.086	0.8	0.87	0.38	0.95	0.67	0.5	0.88
TMED2	1.72	0.086	0.8	-0.46	0.64	0.97	-1.06	0.29	0.77
UBE3C	1.72	0.086	0.8	0.04	0.97	1	-0.69	0.49	0.88
BAG4	1.71	0.087	0.8	0.89	0.37	0.95	-2.24	0.025	0.41
CCDC177	-1.71	0.087	0.8	0.62	0.54	0.96	0.98	0.33	0.8
CNNM4	-1.72	0.087	0.8	0.57	0.57	0.97	0.15	0.88	0.98
FAM117B	1.71	0.087	0.8	0.11	0.92	0.99	-1.76	0.079	0.55
GCN1	1.71	0.087	0.8	-0.42	0.68	0.98	0.46	0.65	0.93
LINS1	1.71	0.087	0.8	-0.91	0.36	0.95	-1.23	0.22	0.72
MICB	-1.71	0.087	0.8	1.12	0.26	0.93	-0.81	0.42	0.85
MYRF	1.72	0.087	0.8	1.64	0.1	0.86	-3.77	0.00018	0.045
NOXRED1	-1.71	0.087	0.8	0.44	0.66	0.97	0.15	0.88	0.98
PAH	-1.71	0.087	0.8	-0.08	0.94	1	-0.49	0.62	0.92
RMND5A	1.72	0.087	0.8	-1.88	0.061	0.82	-0.17	0.87	0.98
SEPT12	-1.72	0.087	0.8	1.35	0.18	0.91	-0.38	0.7	0.94
TCF23	1.72	0.087	0.8	0.02	0.98	1	-1.56	0.12	0.61
TMEM229A	1.72	0.087	0.8	0.66	0.51	0.96	-1.1	0.27	0.76
UNC45A	-1.71	0.087	0.8	-1.31	0.19	0.92	-0.05	0.96	0.99
AASS	-1.71	0.088	0.8	0.67	0.5	0.96	0.79	0.43	0.85
ACOT1	-1.71	0.088	0.8	0.94	0.35	0.94	-0.3	0.77	0.96
ADCY4	-1.71	0.088	0.8	-0.23	0.82	0.99	1.43	0.15	0.65
ADM2	1.71	0.088	0.8	-1.43	0.15	0.9	-1.49	0.14	0.63
C9orf3	1.71	0.088	0.8	1.37	0.17	0.91	-3.32	0.00095	0.13
CFAP206	-1.71	0.088	0.8	-1.3	0.19	0.92	0.07	0.94	0.99
COLGALT1	-1.71	0.088	0.8	0.52	0.6	0.97	0.2	0.84	0.97
EFEMP1	-1.71	0.088	0.8	-0.66	0.51	0.96	0.22	0.83	0.97
ESR1	1.71	0.088	0.8	0.13	0.9	0.99	0.26	0.8	0.97
GDF9	1.71	0.088	0.8	0.55	0.59	0.97	-2.12	0.034	0.44
GREM1	1.71	0.088	0.8	1.48	0.14	0.9	-2.27	0.023	0.4
HEXIM2	1.71	0.088	0.8	0.4	0.69	0.98	-1.79	0.074	0.54
INVS	1.71	0.088	0.8	0.63	0.53	0.96	0.13	0.9	0.98
IRGC	-1.71	0.088	0.8	0.02	0.99	1	0.28	0.78	0.96
PTPN3	-1.71	0.088	0.8	0.5	0.62	0.97	0.74	0.46	0.87
RFX5	-1.71	0.088	0.8	-0.12	0.91	0.99	0.71	0.48	0.87
SF3B3	-1.71	0.088	0.8	-0.27	0.79	0.98	1.13	0.26	0.75
SLC25A6	1.71	0.088	0.8	-0.25	0.8	0.99	-0.49	0.62	0.92
[truncated: 16,121 more rows]

## Sheet: S6
Table S6. Differential RNAi dependency score analysis
gene	comutant_t	comutant_pv	comutant_padj	TP53_t	TP53_pv	TP53_padj	RB1_t	RB1_pv	RB1_padj
CCND1	7.75	3.7e-14	5.6e-10	1.45	0.15	0.85	-1.19	0.24	0.52
SKP2	-7.67	6.5e-14	5.6e-10	-4.4	1.3e-05	0.05	5.71	1.7e-08	1.6e-05
CKS1B	-6.94	9.5e-12	5.4e-08	0.2	0.84	0.99	3.7	0.00024	0.011
CDK6	6.88	1.4e-11	6.1e-08	0.23	0.82	0.99	-2.43	0.015	0.12
E2F3	-6.65	6.4e-11	2.2e-07	-3.22	0.0013	0.43	4.03	6.3e-05	0.0045
CCNE2	-6.51	1.5e-10	4.4e-07	-2.69	0.0073	0.57	2.1	0.036	0.19
CRMP1	-6.23	9.9e-10	2.4e-06	0.76	0.44	0.94	2.75	0.0061	0.071
TBC1D2B	6.16	1.3e-09	2.8e-06	-0.25	0.8	0.99	-1.53	0.13	0.38
DNASE1L1	6.07	2.2e-09	4.2e-06	1.53	0.13	0.83	-4.73	2.8e-06	0.00051
CDK4	5.68	2e-08	3.4e-05	2.79	0.0054	0.57	-2.44	0.015	0.12
ELL3	5.27	1.9e-07	0.0003	1.36	0.17	0.86	-3.75	0.00019	0.0093
ORC6	-5.15	3.6e-07	0.00052	-0.43	0.67	0.98	1.23	0.22	0.5
TFDP1	-5.12	4e-07	0.00053	-2.51	0.012	0.6	5.06	5.5e-07	0.00018
PRG3	-4.98	8.9e-07	0.0011	-2.08	0.038	0.71	1.19	0.23	0.52
CST9	-4.97	1.2e-06	0.0013	1	0.32	0.92	3.34	0.00096	0.025
GABRR1	-4.82	1.8e-06	0.0019	1.28	0.2	0.87	0.27	0.79	0.91
ORC1	-4.79	2.1e-06	0.0022	-1.29	0.2	0.87	3.64	0.0003	0.012
GDAP2	-4.79	2.7e-06	0.0026	0.4	0.69	0.98	2.31	0.021	0.14
CREB5	-4.72	3.1e-06	0.0028	-0.05	0.96	1	1.85	0.065	0.26
SPAG4	-4.71	3.2e-06	0.0028	-0.72	0.47	0.95	1.97	0.05	0.23
RFC3	-4.67	3.7e-06	0.003	-0.48	0.63	0.98	2.82	0.0049	0.063
PGA5	4.63	4.7e-06	0.0037	-0.21	0.83	0.99	-2.37	0.018	0.13
RGPD4	4.58	5.5e-06	0.0041	-1.9	0.058	0.75	0.42	0.68	0.85
TMEM65	4.58	5.8e-06	0.0042	-0.78	0.43	0.94	-2.47	0.014	0.11
TADA2B	4.59	6.3e-06	0.0043	0.86	0.39	0.94	-0.88	0.38	0.65
CABS1	-4.6	6.4e-06	0.0043	-1.05	0.29	0.91	2.53	0.012	0.1
PRSS36	4.48	9.5e-06	0.0061	2.53	0.012	0.6	-1.9	0.058	0.25
KHDRBS1	4.44	1.1e-05	0.0064	0.54	0.59	0.97	-1.35	0.18	0.45
ZNF41	4.44	1.1e-05	0.0064	0.39	0.69	0.98	-3.28	0.0011	0.027
FCGR1B	-4.43	1.2e-05	0.0064	0.39	0.69	0.98	3.88	0.00012	0.0066
PNRC2	-4.43	1.2e-05	0.0064	-1.02	0.31	0.91	1.54	0.12	0.37
LOC100101478&H2BFXP	4.43	1.4e-05	0.0074	0.11	0.91	1	-1.66	0.097	0.33
CHRDL1	4.37	1.5e-05	0.0079	-0.78	0.44	0.94	2.24	0.026	0.16
POLR2L	-4.36	1.6e-05	0.0079	0.56	0.58	0.97	0.12	0.9	0.96
UGT1A10	4.35	1.7e-05	0.0082	-1.29	0.2	0.87	-1.49	0.14	0.39
HHATL	4.36	1.9e-05	0.0092	0.96	0.34	0.92	-3.01	0.0029	0.047
PPIL3	-4.3	2.1e-05	0.0096	-0.66	0.51	0.96	-1.23	0.22	0.5
E2F1	-4.27	2.3e-05	0.01	-1.84	0.066	0.78	5.34	1.3e-07	6.8e-05
WSB2	-4.26	2.3e-05	0.01	-1.31	0.19	0.87	1.4	0.16	0.43
GLTP	-4.3	2.4e-05	0.01	-2.56	0.011	0.6	1.9	0.058	0.25
RB1	-4.22	2.8e-05	0.012	-1.29	0.2	0.87	0.2	0.84	0.94
SELENOO	-4.25	2.9e-05	0.012	0.02	0.99	1	3.16	0.0018	0.035
ELK3	4.17	3.5e-05	0.014	1.38	0.17	0.86	-2.98	0.003	0.048
DAXX	-4.15	3.8e-05	0.015	-0.57	0.57	0.97	3.32	0.00096	0.025
MEX3C	-4.15	3.9e-05	0.015	-0.23	0.82	0.99	3.18	0.0016	0.033
IRAK1	-4.13	4.2e-05	0.016	0.24	0.81	0.99	-0.29	0.77	0.91
ANP32E	4.12	4.4e-05	0.016	0.37	0.71	0.98	0.33	0.74	0.89
FMO1	4.12	4.5e-05	0.016	0.39	0.7	0.98	-4	7.4e-05	0.0049
CLCN7	4.08	5.1e-05	0.018	0.56	0.58	0.97	-0.26	0.8	0.92
ARHGEF18	-4.08	5.2e-05	0.018	0.32	0.75	0.99	4	7e-05	0.0047
OVOL2	-4.08	5.2e-05	0.018	-1.56	0.12	0.83	-0.44	0.66	0.84
LAMA1	-4.09	5.5e-05	0.018	1.14	0.26	0.89	1.39	0.17	0.43
MYLK	4.04	6e-05	0.019	0.56	0.57	0.97	1.47	0.14	0.4
PEG3	-4.04	6e-05	0.019	-1.23	0.22	0.88	1.1	0.27	0.55
GARNL3	4.05	6e-05	0.019	-1.06	0.29	0.91	-0.34	0.73	0.89
UGGT1	4.02	6.4e-05	0.019	-0.55	0.58	0.97	-2.45	0.015	0.12
EFHD2	-4.06	6.4e-05	0.019	1.35	0.18	0.86	1.32	0.19	0.46
NFS1	4.07	6.4e-05	0.019	-0.48	0.63	0.98	-2.1	0.037	0.19
TM9SF3	4	7.4e-05	0.021	0.86	0.39	0.94	-2.7	0.0072	0.078
DAZAP1	3.99	7.6e-05	0.021	1.62	0.11	0.82	-0.43	0.67	0.85
CACNA1F	3.98	7.6e-05	0.021	0.35	0.72	0.98	-3.62	0.00032	0.013
IPO4	3.98	7.6e-05	0.021	-0.38	0.7	0.98	-0.58	0.56	0.79
NME1	-3.97	8.1e-05	0.022	0.59	0.56	0.97	-0.47	0.64	0.83
PIM1	-3.95	8.6e-05	0.023	-0.14	0.89	1	2.7	0.0071	0.077
SERINC1	3.96	8.6e-05	0.023	0.58	0.56	0.97	0.74	0.46	0.72
ADAMDEC1	3.95	9.1e-05	0.023	1.7	0.091	0.8	-1.58	0.11	0.36
USO1	3.95	9.1e-05	0.023	-0.4	0.69	0.98	-1.63	0.1	0.34
KRTAP1-3	-3.97	9.2e-05	0.023	-0.94	0.35	0.93	0.96	0.34	0.62
C14orf166	3.94	9.5e-05	0.024	1	0.32	0.92	-2.63	0.0088	0.087
GTF3C3	-3.92	9.7e-05	0.024	-0.47	0.64	0.98	2.48	0.014	0.11
TRIM25	-3.93	9.8e-05	0.024	1.37	0.17	0.86	-0.46	0.64	0.84
PRAMEF6	-3.95	9.9e-05	0.024	-0.02	0.98	1	3.11	0.002	0.038
FPR2	-3.91	0.0001	0.024	-0.59	0.56	0.97	1.95	0.052	0.23
GM2A	-3.9	0.0001	0.024	-0.59	0.56	0.97	2.48	0.013	0.11
ZNF222	-3.92	0.0001	0.024	0.47	0.64	0.98	3.3	0.001	0.026
ARHGDIA	-3.91	0.00011	0.024	0.51	0.61	0.97	2	0.046	0.22
TBX5	3.88	0.00011	0.025	0.26	0.8	0.99	-0.66	0.51	0.75
LOC102723728	3.87	0.00012	0.026	0.1	0.92	1	-4.23	2.7e-05	0.0027
AGBL2	3.89	0.00012	0.025	1.58	0.11	0.83	-4.11	4.6e-05	0.0038
DOCK5	3.87	0.00012	0.026	-0.78	0.44	0.94	-0.91	0.36	0.64
FBXO38	-3.91	0.00012	0.025	0.6	0.55	0.97	2.24	0.026	0.16
PDLIM3	-3.89	0.00013	0.026	-0.05	0.96	1	3.11	0.0021	0.038
MYO3A	3.85	0.00013	0.026	1.6	0.11	0.82	-1.03	0.31	0.59
PPIC	-3.85	0.00013	0.027	0.66	0.51	0.96	2.01	0.045	0.22
TRAF5	-3.87	0.00013	0.026	-2.71	0.0071	0.57	0.55	0.58	0.8
CDC45	-3.86	0.00013	0.026	-1.2	0.23	0.88	3.33	0.00093	0.024
EIF4B	-3.84	0.00014	0.027	1.29	0.2	0.87	-0.02	0.98	0.99
RAB40AL	3.84	0.00014	0.027	1.14	0.26	0.89	-1.93	0.054	0.24
ATP13A5	3.85	0.00014	0.027	-0.77	0.44	0.94	0.94	0.35	0.63
FOXO1	3.82	0.00015	0.028	0.97	0.33	0.92	-0.98	0.33	0.61
COMMD9	-3.85	0.00015	0.028	-0.46	0.65	0.98	2.02	0.045	0.21
AP1M2	-3.82	0.00016	0.03	-0.54	0.59	0.97	1.27	0.2	0.48
OR52A1	3.81	0.00016	0.03	0.36	0.72	0.98	-2.55	0.011	0.098
KRTAP1-1	-3.82	0.00016	0.03	-1.31	0.19	0.87	2.51	0.013	0.11
CUL4B	3.8	0.00016	0.03	-0.42	0.67	0.98	-2	0.046	0.22
TMEM132B	3.82	0.00017	0.03	-0.46	0.64	0.98	-0.65	0.52	0.76
ACBD3	3.8	0.00017	0.03	0.76	0.45	0.94	-2.16	0.031	0.17
TRMT1L	3.79	0.00017	0.03	1.38	0.17	0.86	-0.58	0.56	0.79
PCBD2	-3.8	0.00018	0.031	0.77	0.44	0.94	1.75	0.081	0.3
OR51S1	3.78	0.00019	0.032	-0.68	0.5	0.96	-4.75	3e-06	0.00055
LOC101929322	3.74	0.0002	0.033	-1.08	0.28	0.9	-1.17	0.24	0.53
NPRL2	3.75	0.0002	0.033	-0.43	0.67	0.98	-1.41	0.16	0.42
RNPEP	-3.74	0.0002	0.033	-2.52	0.012	0.6	0.84	0.4	0.67
SELENOP	-3.77	0.0002	0.033	0.35	0.73	0.98	3.19	0.0016	0.033
IQCH	3.77	0.0002	0.033	0.96	0.34	0.92	-3.13	0.002	0.037
ATP8B1	-3.72	0.00021	0.033	-0.22	0.83	0.99	2.31	0.021	0.14
TTC3	-3.73	0.00021	0.033	1.02	0.31	0.91	2.95	0.0033	0.05
PRAM1	-3.76	0.00021	0.033	0.52	0.6	0.97	0.99	0.32	0.6
MYSM1	3.74	0.00022	0.033	1.53	0.13	0.83	-0.69	0.49	0.74
EMX1	-3.72	0.00022	0.033	0.01	1	1	0.58	0.57	0.79
CEP68	3.74	0.00022	0.033	0.75	0.46	0.95	-4.04	6.8e-05	0.0046
LAMB2	3.74	0.00022	0.033	1.47	0.14	0.85	-3.72	0.00024	0.011
PRPF39	3.75	0.00022	0.033	-0.54	0.59	0.97	-0.69	0.49	0.74
EBF2	-3.72	0.00022	0.033	0.93	0.35	0.93	1.41	0.16	0.42
SMS	3.73	0.00022	0.033	0.56	0.57	0.97	-0.23	0.82	0.93
SRP9	3.72	0.00022	0.033	3.12	0.0019	0.47	-3.92	0.0001	0.0059
SLC25A2	-3.72	0.00022	0.033	-1.6	0.11	0.82	2	0.046	0.22
C1orf198	3.75	0.00022	0.033	-3.94	0.0001	0.18	-2.44	0.015	0.12
AASDH	3.71	0.00023	0.033	1.11	0.27	0.9	-3.41	0.00071	0.021
COPS9	-3.73	0.00023	0.033	-1.01	0.31	0.91	2.3	0.022	0.14
UBR5	3.7	0.00023	0.033	1.62	0.11	0.82	-0.09	0.93	0.97
LOC653513	3.71	0.00023	0.033	-0.51	0.61	0.97	-2.46	0.014	0.11
SENP3-EIF4A1	3.69	0.00024	0.033	0.08	0.94	1	-1.43	0.15	0.42
ATRX	3.69	0.00024	0.033	-0.23	0.82	0.99	-0.37	0.71	0.87
SLC17A3	3.69	0.00025	0.034	0.38	0.7	0.98	-2.44	0.015	0.12
DKK3	-3.69	0.00025	0.034	-1.92	0.055	0.75	1.67	0.095	0.32
DERL1	-3.69	0.00025	0.034	-0.48	0.63	0.98	1.46	0.14	0.4
NOG	-3.69	0.00025	0.034	0.42	0.68	0.98	-0.17	0.86	0.95
PMPCB	3.68	0.00026	0.035	1.24	0.22	0.88	-0.62	0.53	0.77
ZNF281	3.66	0.00028	0.037	1.54	0.12	0.83	-2.88	0.0041	0.057
AIG1	-3.65	0.00028	0.037	0.36	0.72	0.98	0.26	0.79	0.92
BNIP3	3.65	0.00028	0.037	1.41	0.16	0.85	-3.72	0.00022	0.01
FCGR1CP	3.65	0.00029	0.038	1.09	0.28	0.9	-4.06	5.7e-05	0.0043
KBTBD3	-3.65	0.00029	0.037	-0.22	0.83	0.99	-0.35	0.72	0.88
UPF1	3.63	0.00031	0.04	1.27	0.21	0.88	-0.15	0.88	0.95
COL6A6	3.64	0.00032	0.04	0.24	0.81	0.99	-1.26	0.21	0.49
RIOK1	3.62	0.00032	0.04	-0.97	0.33	0.92	2.06	0.04	0.2
TEN1-CDK3&CDK3	-3.61	0.00033	0.04	1.7	0.09	0.8	-0.06	0.95	0.98
CHI3L1	3.62	0.00033	0.04	-1.12	0.27	0.9	-2.34	0.02	0.14
SPEN	3.61	0.00033	0.04	-0.61	0.54	0.97	-0.81	0.42	0.68
GPRASP1	3.62	0.00033	0.04	-0.47	0.64	0.98	-1.97	0.05	0.23
GLB1	-3.6	0.00034	0.042	-0.51	0.61	0.97	0.89	0.37	0.65
DPT	3.6	0.00035	0.042	1.41	0.16	0.86	-2.46	0.014	0.11
HS3ST4	3.6	0.00035	0.042	-0.01	1	1	-2.49	0.013	0.11
C19orf18	-3.61	0.00036	0.043	1.15	0.25	0.89	1.67	0.095	0.33
GTF2H4	3.58	0.00037	0.044	-0.1	0.92	1	-2.01	0.045	0.22
IL20	-3.59	0.00037	0.043	-1.35	0.18	0.86	1.72	0.086	0.31
CD99	-3.57	0.00039	0.045	0.59	0.56	0.97	1.24	0.22	0.49
SRP54	3.59	0.00039	0.046	-0.29	0.77	0.99	-2.75	0.0063	0.072
TOMM20L	3.58	0.0004	0.046	0.03	0.98	1	-3.69	0.00026	0.012
BRI3	-3.56	0.00041	0.046	-2.19	0.029	0.67	2.3	0.022	0.14
TCOF1	-3.55	0.00041	0.046	-0.05	0.96	1	1.91	0.057	0.24
GCHFR	-3.55	0.00042	0.047	-1.91	0.056	0.75	0.71	0.48	0.73
SLK	3.53	0.00045	0.051	-0.67	0.5	0.96	-1.17	0.24	0.52
CDK2	-3.52	0.00047	0.052	-2.66	0.0081	0.58	0.9	0.37	0.64
HRASLS2	-3.54	0.00047	0.052	0.4	0.69	0.98	2.07	0.039	0.2
ZNF25	3.52	0.00048	0.052	0.52	0.6	0.97	-2.25	0.025	0.15
KDELR1	-3.51	0.00049	0.053	-1.53	0.13	0.83	2.27	0.024	0.15
PCAT4	-3.51	0.00049	0.053	1.56	0.12	0.83	-1.35	0.18	0.45
TNRC6C	-3.5	0.00049	0.053	-0.61	0.54	0.97	1.9	0.058	0.25
ZNF471	-3.51	0.0005	0.053	-0.8	0.42	0.94	0.66	0.51	0.75
CDC37	3.49	0.00052	0.055	-0.03	0.98	1	0.17	0.86	0.95
IMPA1	3.49	0.00052	0.055	-0.66	0.51	0.96	-0.57	0.57	0.79
WT1	3.49	0.00052	0.055	-0.02	0.98	1	-1.96	0.05	0.23
ADAMTS14	-3.48	0.00054	0.056	-0.15	0.88	1	1.9	0.058	0.25
PDIA3P1	-3.5	0.00054	0.056	-0.86	0.39	0.94	0.65	0.51	0.75
APOA4	-3.48	0.00054	0.056	-1.93	0.054	0.74	1.54	0.12	0.37
CHM	3.47	0.00056	0.058	-0.78	0.44	0.94	-0.28	0.78	0.91
ITPRIPL1	-3.48	0.00058	0.059	0.73	0.46	0.95	2.87	0.0044	0.059
CLEC4F	3.46	0.00058	0.059	1.52	0.13	0.83	-3.17	0.0016	0.033
CMTM6	3.48	0.00058	0.059	1.92	0.056	0.75	-3.14	0.0019	0.036
ARHGEF26	-3.45	0.0006	0.06	-2.37	0.018	0.63	1.32	0.19	0.46
ALMS1P1	3.46	0.00061	0.06	0.08	0.94	1	-2.89	0.0042	0.057
LGALS17A	3.45	0.00061	0.06	-1.31	0.19	0.87	1.22	0.22	0.5
DPM1	3.45	0.00061	0.06	-0.61	0.54	0.97	-2.75	0.0062	0.071
NDUFV2	3.45	0.00062	0.06	-0.37	0.71	0.98	0.82	0.41	0.68
GRIPAP1	-3.45	0.00065	0.063	1.24	0.21	0.88	2.55	0.011	0.099
LOC105370978	3.43	0.00067	0.065	-0.12	0.9	1	1.44	0.15	0.41
SERPINA5	-3.42	0.00067	0.065	-0.24	0.81	0.99	-0.05	0.96	0.98
SPNS3	-3.44	0.00068	0.065	-0.51	0.61	0.97	3.2	0.0015	0.033
FAM157B	3.43	0.0007	0.066	-0.09	0.93	1	-3.08	0.0023	0.041
LOC101929876	3.43	0.0007	0.066	-1.23	0.22	0.88	-2.9	0.004	0.056
DES	3.41	0.0007	0.066	0.09	0.92	1	-1.85	0.065	0.26
B3GLCT	-3.39	0.00074	0.07	0.88	0.38	0.93	-1.64	0.1	0.34
LOC107984067	-3.41	0.00076	0.071	0.42	0.68	0.98	2.79	0.0057	0.069
CTAG2	3.39	0.00076	0.071	0.28	0.78	0.99	-1.69	0.092	0.32
BEX2	-3.41	0.00076	0.071	-0.89	0.38	0.93	3.1	0.0021	0.039
ASCC3	3.37	0.00078	0.071	0	1	1	-1.44	0.15	0.41
NUP35	-3.38	0.00078	0.071	-1.76	0.079	0.8	2.44	0.015	0.12
PCDH11X	3.38	0.00078	0.071	0.03	0.98	1	-3.04	0.0025	0.043
TMA16	-3.4	0.00078	0.071	0.74	0.46	0.95	2.08	0.038	0.2
UGT2B4	-3.38	0.00078	0.071	0.79	0.43	0.94	0.5	0.62	0.82
SSR1	-3.37	0.00079	0.071	0.38	0.71	0.98	1.15	0.25	0.53
ZNF438	-3.37	0.00082	0.072	-1.31	0.19	0.87	-0.7	0.48	0.73
DNALI1	3.38	0.00082	0.072	-0.32	0.75	0.99	-1.47	0.14	0.4
BAIAP3	-3.37	0.00085	0.075	0.97	0.33	0.92	1.44	0.15	0.41
APOC4	3.37	0.00086	0.075	0.64	0.53	0.96	-1.42	0.16	0.42
RIN3	-3.35	0.00086	0.075	-0.62	0.54	0.97	2.82	0.0051	0.064
PDC	3.35	0.00087	0.076	1.92	0.056	0.75	-1.1	0.27	0.55
ORAOV1	-3.34	0.00088	0.076	-1.87	0.062	0.76	4.14	4e-05	0.0034
ANKRD20A19P	3.34	0.00089	0.077	-1.75	0.081	0.8	1.58	0.11	0.36
AIFM3	3.33	0.00091	0.077	-1.52	0.13	0.83	-1.75	0.081	0.3
C20orf166-AS1	3.35	0.00092	0.077	1.71	0.089	0.8	-1.23	0.22	0.5
PSMC3IP	-3.33	0.00092	0.077	-0.86	0.39	0.93	0.93	0.35	0.63
SNRPE	-3.33	0.00092	0.077	1.44	0.15	0.85	-0.82	0.41	0.68
SEC24C	-3.33	0.00093	0.078	-0.17	0.87	1	2.65	0.0083	0.084
HSD3B1	3.33	0.00094	0.078	0.55	0.58	0.97	-1.17	0.24	0.52
RNF39	-3.33	0.00094	0.078	-0.09	0.93	1	2.31	0.022	0.14
STK17B	-3.32	0.00095	0.079	-0.76	0.44	0.94	3.42	0.00067	0.02
TRAM1L1	-3.34	0.00096	0.079	0.37	0.71	0.98	-0.07	0.94	0.98
DDX21	3.32	0.00096	0.079	-1.14	0.26	0.89	4.93	1e-06	0.00028
RCC1	-3.32	0.00097	0.079	-1.12	0.26	0.89	-0.06	0.95	0.98
TPCN1	-3.32	0.00097	0.079	0.07	0.94	1	1.09	0.28	0.56
TCEAL8	-3.33	0.00098	0.079	-0.3	0.76	0.99	0.97	0.34	0.61
ZNF559-ZNF177&ZNF177	-3.31	0.00099	0.079	-0.18	0.85	0.99	0.77	0.44	0.7
QRSL1	3.31	0.00099	0.079	1.03	0.3	0.91	-2.69	0.0074	0.079
DBET	3.31	0.001	0.08	-0.68	0.5	0.96	-0.53	0.6	0.81
CCNO	3.3	0.001	0.08	-0.03	0.98	1	-2.01	0.045	0.21
PIGU	3.3	0.001	0.081	0.46	0.65	0.98	0.06	0.95	0.98
FAM81A	3.32	0.001	0.08	-0.15	0.88	1	-1.34	0.18	0.45
SEC14L2	3.3	0.001	0.08	-0.93	0.35	0.93	-2.42	0.016	0.12
AACS	3.31	0.001	0.079	-0.31	0.76	0.99	-0.25	0.8	0.92
DCTN5	-3.31	0.001	0.081	-2.62	0.0093	0.58	1.61	0.11	0.35
COMP	-3.29	0.0011	0.082	-0.21	0.84	0.99	3.62	0.00032	0.013
B3GNTL1	-3.3	0.0011	0.082	0.6	0.55	0.97	2.33	0.02	0.14
LMTK2	-3.29	0.0011	0.081	-0.04	0.97	1	0.24	0.81	0.92
DENND3	3.29	0.0011	0.082	1.7	0.09	0.8	-1.7	0.09	0.32
GPM6A	3.3	0.0011	0.082	3.17	0.0017	0.46	-3.46	0.00063	0.02
H1F0	-3.27	0.0011	0.084	0.2	0.84	0.99	1.83	0.067	0.27
SCN3B	3.28	0.0011	0.083	1.02	0.31	0.91	-0.82	0.41	0.68
SMAP2	-3.28	0.0011	0.084	-0.91	0.37	0.93	-0.02	0.99	0.99
SPINK1	-3.27	0.0011	0.084	-0.05	0.96	1	0.83	0.41	0.67
ZFP37	-3.27	0.0011	0.084	-0.73	0.46	0.95	1.61	0.11	0.35
TXNDC5	-3.28	0.0011	0.083	-0.25	0.81	0.99	2.54	0.011	0.099
MICAL2	3.28	0.0011	0.083	-1.87	0.062	0.76	3.4	0.00072	0.021
WDTC1	-3.26	0.0012	0.085	0.88	0.38	0.93	1.4	0.16	0.43
EHD4	-3.26	0.0012	0.085	1.76	0.078	0.8	1.52	0.13	0.38
MCC	-3.25	0.0012	0.086	-1.66	0.098	0.81	2.26	0.024	0.15
PLOD1	-3.26	0.0012	0.085	-0.84	0.4	0.94	4.64	4.2e-06	0.00069
POLE2	-3.26	0.0012	0.085	-0.1	0.92	1	2.67	0.0077	0.08
ZNF319	3.25	0.0012	0.086	1.23	0.22	0.88	0.15	0.88	0.95
TIAM1	3.26	0.0012	0.085	1.24	0.22	0.88	0.19	0.85	0.94
TSG101	3.25	0.0012	0.086	2.95	0.0033	0.53	-4.13	4e-05	0.0034
ZNF155	-3.27	0.0012	0.084	-0.52	0.6	0.97	3.59	0.00037	0.014
MFSD14B	3.25	0.0012	0.086	0.07	0.94	1	-0.55	0.58	0.8
PLCD4	3.25	0.0012	0.086	1.17	0.24	0.89	-1.85	0.065	0.26
PDE8B	3.26	0.0012	0.085	0.42	0.67	0.98	0.09	0.93	0.97
RHOBTB1	3.25	0.0012	0.086	2.15	0.032	0.68	-0.55	0.58	0.8
GJA9-MYCBP	-3.23	0.0013	0.088	0.12	0.9	1	-2.37	0.018	0.13
ASB6	-3.25	0.0013	0.088	-1.35	0.18	0.86	2.58	0.01	0.096
CRYBB3	-3.26	0.0013	0.087	1.26	0.21	0.88	4.02	7.3e-05	0.0048
CTNND1	3.23	0.0013	0.088	1.14	0.25	0.89	-2.57	0.01	0.095
GZMK	3.22	0.0013	0.089	-0.27	0.79	0.99	0.02	0.99	0.99
BCRP2	3.23	0.0013	0.089	2.02	0.044	0.73	-3.54	0.00043	0.015
MGC70870	3.24	0.0013	0.088	1.44	0.15	0.85	-0.93	0.35	0.63
SPANXN1	-3.26	0.0013	0.088	1.3	0.19	0.87	2.7	0.0075	0.079
TACC1	-3.26	0.0013	0.087	2.29	0.023	0.65	0.38	0.7	0.87
ITIH5	3.23	0.0013	0.089	-0.06	0.95	1	-1.27	0.2	0.48
TNFSF18	3.23	0.0013	0.089	-1.72	0.086	0.8	-2.41	0.016	0.12
HS6ST2	3.23	0.0013	0.089	0.01	0.99	1	-1.07	0.28	0.57
APOBEC3B	-3.26	0.0013	0.087	-2.23	0.027	0.66	2.96	0.0034	0.051
RABL2A	-3.21	0.0014	0.09	1.22	0.22	0.88	-5.2	2.7e-07	0.00011
ASB11	-3.21	0.0014	0.09	-0.46	0.64	0.98	3.38	0.00078	0.022
ESRRG	-3.21	0.0014	0.09	-2.28	0.023	0.65	1.02	0.31	0.59
LINC00602	3.23	0.0014	0.09	0.65	0.52	0.96	-1.92	0.056	0.24
OR1F1	3.21	0.0014	0.09	1.11	0.27	0.9	-2.12	0.035	0.19
SERPINF1	-3.21	0.0014	0.09	0.86	0.39	0.93	-0.98	0.33	0.61
MRGBP	-3.23	0.0014	0.09	0.44	0.66	0.98	3.45	0.00064	0.02
TTN	3.22	0.0014	0.089	0.74	0.46	0.95	-1.42	0.16	0.42
PABPC1L	3.22	0.0014	0.09	0.61	0.54	0.97	-2.92	0.0037	0.054
KRTAP17-1	-3.22	0.0014	0.09	-0.5	0.62	0.97	2.03	0.043	0.21
TUBB6	-3.22	0.0014	0.089	-0.19	0.85	0.99	-0.58	0.56	0.79
SOCS3	3.2	0.0014	0.09	-0.76	0.45	0.94	-0.44	0.66	0.84
ZBTB39	-3.21	0.0014	0.09	-0.45	0.65	0.98	2.15	0.032	0.18
LINC01160&LOC105379331&LOC107984772&FAM71F2	3.2	0.0015	0.093	-0.67	0.5	0.96	0.54	0.59	0.8
CCT2	-3.18	0.0015	0.093	-1.53	0.13	0.83	1.58	0.12	0.36
EMILIN1	-3.19	0.0015	0.092	0.82	0.41	0.94	0.79	0.43	0.7
CHD5	3.19	0.0015	0.092	-0.5	0.61	0.97	-0.23	0.82	0.93
CLUL1	-3.21	0.0015	0.092	-1.09	0.28	0.9	1.52	0.13	0.38
HLA-DQB2	3.19	0.0015	0.093	-0.29	0.77	0.99	-1.92	0.055	0.24
MMAB	-3.2	0.0015	0.092	0.05	0.96	1	1.89	0.059	0.25
BMP8A	3.19	0.0015	0.093	0.78	0.44	0.94	-1.14	0.25	0.54
NRROS	-3.18	0.0015	0.093	-1.56	0.12	0.83	0.07	0.94	0.98
CYB5R4	3.2	0.0015	0.092	0.33	0.74	0.99	-0.97	0.33	0.61
ACTR3B	3.19	0.0015	0.093	-0.32	0.75	0.99	-1.91	0.056	0.24
AARS2	3.2	0.0015	0.092	1.2	0.23	0.88	-1.46	0.14	0.4
FAM49A	-3.2	0.0015	0.093	0.45	0.65	0.98	4.04	6.9e-05	0.0047
DVL1	3.18	0.0016	0.095	-1.11	0.27	0.9	-1.34	0.18	0.45
GJA8	3.17	0.0016	0.096	0.5	0.62	0.97	2.3	0.022	0.14
PANK1	-3.16	0.0016	0.096	-0.5	0.62	0.97	3.7	0.00023	0.011
FNBP1L	3.17	0.0016	0.096	2.77	0.0058	0.57	-1.8	0.073	0.28
SRPK2	3.16	0.0016	0.096	0.89	0.38	0.93	-3.9	0.00011	0.0062
ZC3H14	3.18	0.0016	0.096	-0.98	0.33	0.92	-2.52	0.012	0.1
PRPF3	3.16	0.0016	0.096	1.13	0.26	0.89	-3.43	0.00064	0.02
CUL7	3.17	0.0016	0.096	-0.3	0.77	0.99	-0.72	0.47	0.72
CIART	3.17	0.0017	0.098	0.87	0.38	0.93	-1.81	0.071	0.28
SPDEF	3.16	0.0017	0.098	-1.51	0.13	0.83	-3.14	0.0018	0.035
HSD17B11	3.16	0.0017	0.097	1.56	0.12	0.83	1.8	0.072	0.28
MKL2	3.15	0.0017	0.099	0.9	0.37	0.93	0.97	0.33	0.61
RNASE3	3.16	0.0017	0.098	-0.04	0.97	1	-1.79	0.074	0.28
RORB	3.15	0.0017	0.098	0.65	0.51	0.96	-1.91	0.056	0.24
ARRDC4	3.15	0.0017	0.099	0.47	0.64	0.98	-1.63	0.1	0.34
LOC100996724	-3.14	0.0018	0.099	-1.5	0.13	0.83	4.29	2e-05	0.0023
SLC27A2	-3.13	0.0018	0.1	-0.14	0.89	1	-0.01	0.99	1
TBC1D20	3.14	0.0018	0.1	-1.58	0.11	0.83	0	1	1
CPA3	-3.14	0.0018	0.099	1	0.32	0.92	0.99	0.32	0.6
KCNC3	-3.14	0.0018	0.099	2.74	0.0063	0.57	-2.67	0.0078	0.081
ASIC1	-3.16	0.0018	0.099	-0.59	0.55	0.97	1.58	0.12	0.36
POLR1D	3.14	0.0018	0.1	-1.33	0.18	0.87	-2.03	0.043	0.21
EQTN	3.15	0.0018	0.1	0.66	0.51	0.96	-1.15	0.25	0.53
DMRTC1&DMRTC1B	-3.16	0.0018	0.1	0.65	0.52	0.96	2.05	0.041	0.21
SHOX	-3.15	0.0018	0.099	-0.95	0.34	0.92	1.13	0.26	0.54
CHRNA6	3.14	0.0018	0.099	1.16	0.24	0.89	1.02	0.31	0.59
AURKB	-3.14	0.0018	0.099	0.12	0.91	1	2.23	0.026	0.16
SPEG	3.12	0.0019	0.1	2.17	0.03	0.68	-0.69	0.49	0.74
OR2T34&OR2T3	3.12	0.0019	0.1	-1.06	0.29	0.91	4.72	3.4e-06	0.00059
CRHBP	3.14	0.0019	0.1	0.27	0.78	0.99	0.43	0.66	0.85
ZSCAN29	3.12	0.0019	0.1	0.68	0.5	0.96	-0.43	0.67	0.85
ANKS1A	3.12	0.0019	0.1	-0.54	0.59	0.97	-1.66	0.097	0.33
LHX6	3.11	0.0019	0.1	2.61	0.0093	0.58	-0.42	0.68	0.85
KRT26	-3.12	0.0019	0.1	-1.29	0.2	0.87	1.57	0.12	0.36
PTPRO	3.13	0.0019	0.1	-0.58	0.56	0.97	-1.48	0.14	0.4
SNRPF	-3.12	0.0019	0.1	1.37	0.17	0.86	2.19	0.029	0.17
AXIN1	-3.13	0.0019	0.1	-0.49	0.63	0.98	0.25	0.81	0.92
TEKT1	-3.14	0.0019	0.1	-0.32	0.75	0.99	1.73	0.084	0.3
HCAR3	-3.12	0.0019	0.1	-1.21	0.23	0.88	0.62	0.53	0.77
ITM2A	3.14	0.0019	0.1	0.23	0.82	0.99	-0.42	0.67	0.85
UPK3BL1	3.11	0.002	0.1	1.46	0.15	0.85	3.45	0.00062	0.02
DNAAF4	-3.12	0.002	0.1	-1.11	0.27	0.9	4.85	2.1e-06	0.00043
FAM9C	-3.12	0.002	0.1	-1.1	0.27	0.9	0.52	0.6	0.81
SERPINB1	-3.1	0.002	0.1	-0.06	0.95	1	0.95	0.34	0.62
POMZP3	-3.12	0.002	0.1	-0.7	0.48	0.95	2.77	0.0059	0.07
IBTK	-3.1	0.002	0.1	-0.64	0.52	0.96	-0.99	0.32	0.6
TSEN54	-3.12	0.002	0.1	-0.79	0.43	0.94	0.22	0.83	0.93
SEC61A1	3.12	0.002	0.1	0.64	0.53	0.96	-2.91	0.0039	0.055
MYLK4	3.1	0.002	0.1	1.62	0.11	0.82	0.44	0.66	0.85
KLK3	-3.11	0.002	0.1	0.77	0.44	0.94	1.52	0.13	0.38
PRKAA2	-3.11	0.002	0.1	-0.33	0.74	0.99	1.8	0.072	0.28
PSMC1	3.1	0.002	0.1	-0.14	0.89	1	-0.37	0.71	0.87
IGDCC4	3.11	0.002	0.1	-2.08	0.038	0.71	-0.18	0.85	0.94
TPI1	-3.11	0.002	0.1	0.37	0.71	0.98	0.24	0.81	0.92
GPANK1	-3.11	0.002	0.1	1.91	0.058	0.75	0.75	0.45	0.71
GORAB	-3.12	0.002	0.1	0.42	0.68	0.98	0.87	0.38	0.66
MPC1	3.09	0.0021	0.11	-0.43	0.66	0.98	-1.53	0.13	0.38
PGR	-3.09	0.0021	0.1	-0.12	0.91	1	2.13	0.033	0.18
GAN	3.09	0.0021	0.1	0.72	0.47	0.95	-2.91	0.0037	0.054
ZBTB37	3.09	0.0021	0.11	-2	0.046	0.73	1.35	0.18	0.44
DMTF1	3.09	0.0021	0.11	1.3	0.19	0.87	-2.04	0.041	0.21
RAB40A	-3.08	0.0022	0.11	-1.15	0.25	0.89	1.55	0.12	0.37
PIWIL4	-3.09	0.0022	0.11	0.93	0.35	0.93	0.86	0.39	0.66
OR6V1	-3.07	0.0022	0.11	0.46	0.64	0.98	2.43	0.016	0.12
CHRAC1	-3.07	0.0022	0.11	1.38	0.17	0.86	3.2	0.0014	0.031
KLHL28	3.08	0.0022	0.11	1.66	0.097	0.81	-1.6	0.11	0.35
SHB	3.07	0.0022	0.11	1.36	0.17	0.86	1.15	0.25	0.53
ZNF512	3.09	0.0022	0.11	-0.72	0.47	0.95	-2.46	0.015	0.12
FBXO32	3.07	0.0023	0.11	-1.74	0.082	0.8	0.9	0.37	0.65
HINT3	3.07	0.0023	0.11	0.19	0.85	0.99	0.04	0.97	0.99
CNKSR3	-3.07	0.0023	0.11	-1.04	0.3	0.91	-0.43	0.67	0.85
HIVEP1	3.06	0.0023	0.11	0.65	0.52	0.96	-1.86	0.064	0.26
PABPN1L	3.08	0.0023	0.11	0.39	0.7	0.98	1.1	0.27	0.55
DYNLL1	3.06	0.0023	0.11	0.31	0.76	0.99	-0.88	0.38	0.65
NEDD1	-3.05	0.0024	0.11	-1.17	0.24	0.89	2.89	0.004	0.056
DOK1	3.06	0.0024	0.11	-0.57	0.57	0.97	-0.91	0.36	0.64
NPHP3	3.07	0.0024	0.11	1.42	0.16	0.85	-1.41	0.16	0.43
CERS2	-3.05	0.0024	0.11	0.99	0.32	0.92	1.69	0.091	0.32
ITIH6	3.06	0.0024	0.11	1.71	0.088	0.8	-1.9	0.059	0.25
STX1A	-3.05	0.0024	0.11	-0.07	0.94	1	2.21	0.028	0.16
DEFB126	-3.06	0.0024	0.11	-0.12	0.9	1	2.43	0.016	0.12
TMTC1	3.06	0.0024	0.11	2.01	0.045	0.73	-3.72	0.00024	0.011
ZNF677	-3.04	0.0025	0.12	1.34	0.18	0.86	0.67	0.5	0.75
LIPT1	-3.04	0.0025	0.12	0.36	0.72	0.98	1.4	0.16	0.43
METTL13	-3.03	0.0025	0.12	-0.39	0.7	0.98	1.34	0.18	0.45
ENOSF1	-3.05	0.0025	0.12	0.39	0.69	0.98	1.33	0.19	0.46
MYDGF	-3.04	0.0025	0.12	-0.59	0.55	0.97	2.88	0.0042	0.057
ROS1	3.03	0.0025	0.12	-0.64	0.52	0.96	0.74	0.46	0.71
MBD3L4&MBD3L3	-3.03	0.0025	0.12	-0.75	0.45	0.95	-1.08	0.28	0.56
SLC17A1	-3.04	0.0025	0.12	0.1	0.92	1	3.53	0.00046	0.016
NPEPPS	3.03	0.0025	0.12	1.38	0.17	0.86	-2.07	0.039	0.2
CACNG2	-3.02	0.0026	0.12	0.54	0.59	0.97	-1.35	0.18	0.45
SAMD13	-3.04	0.0026	0.12	-0.19	0.85	0.99	4.03	7.2e-05	0.0048
FOXD4L1	3.02	0.0026	0.12	-0.24	0.81	0.99	0.45	0.65	0.84
NCOA6	3.02	0.0026	0.12	-1.38	0.17	0.86	0.65	0.51	0.75
NPPA	-3.04	0.0026	0.12	0.23	0.82	0.99	0.62	0.54	0.77
RBM26	3.03	0.0026	0.12	0.86	0.39	0.94	-0.72	0.47	0.72
USP7	3.02	0.0026	0.12	-0.75	0.46	0.95	8.62	5.1e-17	1.8e-13
TCHP	3.04	0.0026	0.12	-0.1	0.92	1	-2.83	0.005	0.064
PRPF4B	3.02	0.0026	0.12	0.04	0.97	1	3.14	0.0018	0.035
RPP30	3.01	0.0027	0.12	0.03	0.98	1	-3.26	0.0012	0.028
LOXHD1	3.02	0.0027	0.12	1.09	0.28	0.9	-3.02	0.0027	0.045
RASA3	-3.01	0.0027	0.12	1.51	0.13	0.83	1.38	0.17	0.43
INSR	-3.01	0.0027	0.12	-2.45	0.015	0.62	4.78	2.2e-06	0.00043
WNT4	3.02	0.0027	0.12	0.38	0.71	0.98	0.59	0.56	0.78
MYO5C	3.03	0.0027	0.12	1.63	0.1	0.82	-0.84	0.4	0.67
ZSCAN31	-3.02	0.0027	0.12	-0.85	0.39	0.94	3.98	8.1e-05	0.0051
CNDP1	3.02	0.0027	0.12	-1.21	0.23	0.88	0.45	0.65	0.84
ST3GAL6	3	0.0028	0.12	-0.23	0.82	0.99	2.47	0.014	0.11
RABL2B	3	0.0028	0.12	-0.38	0.7	0.98	1.27	0.2	0.48
CSPG4	-3	0.0028	0.12	0.04	0.97	1	0.89	0.37	0.65
NRK	3	0.0028	0.12	0.11	0.91	1	-1.25	0.21	0.49
ATL3	3	0.0028	0.12	-0.65	0.51	0.96	-2.29	0.022	0.15
DNAJC4	3	0.0028	0.12	-0.08	0.94	1	-2.24	0.026	0.16
RBM11	-3.01	0.0028	0.12	-0.36	0.72	0.98	2.33	0.02	0.14
PPP2CA	3	0.0028	0.12	-0.99	0.32	0.92	1.45	0.15	0.41
ZNF446	3	0.0028	0.12	-0.27	0.79	0.99	-0.93	0.35	0.63
PARP6	-3.01	0.0028	0.12	0.13	0.9	1	1.98	0.048	0.22
SLC5A5	3	0.0028	0.12	-0.24	0.81	0.99	-2.9	0.0039	0.055
SLMAP	3.02	0.0028	0.12	0.76	0.45	0.94	-2.36	0.019	0.13
CDC16	3.01	0.0028	0.12	0.35	0.73	0.98	-2.01	0.046	0.22
CNIH1	3	0.0029	0.12	-1.06	0.29	0.91	-0.12	0.91	0.96
CLTB	-3	0.0029	0.12	-0.45	0.65	0.98	-0.1	0.92	0.97
CRYGD	-2.99	0.0029	0.12	0.47	0.64	0.98	2.41	0.016	0.12
AGPAT1	-2.98	0.003	0.12	0.37	0.71	0.98	1.78	0.075	0.29
CHML	2.98	0.003	0.12	-0.13	0.9	1	-2.16	0.031	0.17
C16orf89	2.99	0.003	0.12	0.33	0.74	0.99	-2.82	0.0051	0.064
RPE65	2.98	0.003	0.12	0.26	0.79	0.99	-2.19	0.029	0.17
CCL2	2.98	0.003	0.12	-0.24	0.81	0.99	-3.68	0.00025	0.011
CNTN2	2.98	0.003	0.12	2.47	0.014	0.61	-3.47	0.00057	0.019
UCN	2.98	0.003	0.12	-0.27	0.79	0.99	0.54	0.59	0.8
PMS2P7	-2.97	0.0031	0.12	-1.13	0.26	0.89	-0.35	0.72	0.88
CLDN4	-2.97	0.0031	0.12	0.47	0.64	0.98	0.99	0.32	0.6
LARP1	2.98	0.0031	0.12	-0.7	0.48	0.95	-1.93	0.055	0.24
PAN3	-2.97	0.0031	0.12	-1.39	0.16	0.86	0.11	0.92	0.97
RABL3	2.97	0.0031	0.12	0.65	0.51	0.96	-1.06	0.29	0.57
XKRY2&XKRY	2.98	0.0031	0.12	0.58	0.56	0.97	-4.21	3.5e-05	0.0032
TRIM49D1	-2.97	0.0031	0.12	-0.21	0.84	0.99	-0.92	0.36	0.63
MYO5A	-2.97	0.0031	0.13	0.22	0.83	0.99	1.69	0.092	0.32
C1RL	-2.98	0.0031	0.12	0.41	0.68	0.98	0.28	0.78	0.91
TMA7	-2.98	0.0031	0.13	-0.31	0.75	0.99	1.05	0.3	0.58
RGS3	2.98	0.0031	0.12	0.31	0.75	0.99	-1.04	0.3	0.58
SAT1	2.97	0.0031	0.12	1.25	0.21	0.88	-2.87	0.0042	0.058
PORCN	2.97	0.0031	0.12	-1.19	0.24	0.89	-2.01	0.045	0.22
DNAH11	2.97	0.0031	0.12	0.21	0.83	0.99	-1.42	0.16	0.42
CCDC138	-2.97	0.0032	0.13	-1.26	0.21	0.88	2.25	0.025	0.16
FOXM1	-2.96	0.0032	0.13	-3.13	0.0019	0.47	-0.17	0.86	0.95
LINC00670	-2.97	0.0032	0.13	-1.59	0.11	0.83	2.12	0.035	0.19
LIN9	-2.96	0.0032	0.13	0.12	0.91	1	-0.15	0.88	0.95
RNF141	-2.96	0.0032	0.13	-1.28	0.2	0.87	-1.89	0.06	0.25
ZFAT	2.97	0.0032	0.13	-1.27	0.2	0.88	-0.7	0.49	0.74
NRP2	2.96	0.0032	0.13	1.57	0.12	0.83	-0.32	0.75	0.89
LAMC3	-2.95	0.0033	0.13	0.68	0.5	0.96	1.89	0.059	0.25
ZNF418	-2.95	0.0033	0.13	-0.16	0.88	1	1.29	0.2	0.47
NVL	2.95	0.0033	0.13	0.43	0.67	0.98	-2.73	0.0066	0.074
LOC101060399&CDR2	2.96	0.0034	0.13	-0.65	0.52	0.96	-2.89	0.0042	0.057
FAM69B	2.95	0.0034	0.13	-2.13	0.033	0.69	-0.66	0.51	0.75
AFF3	2.94	0.0034	0.13	-0.08	0.94	1	0.56	0.57	0.79
SPOUT1	2.96	0.0034	0.13	-1.68	0.094	0.81	-2.04	0.042	0.21
LOC729739	2.95	0.0034	0.13	0.69	0.49	0.95	0.32	0.75	0.89
WNT9A	2.94	0.0034	0.13	-0.92	0.36	0.93	-0.21	0.84	0.94
CENPO	-2.94	0.0034	0.13	-0.37	0.71	0.98	-0.64	0.52	0.76
CYP4F2	-2.94	0.0034	0.13	-2.52	0.012	0.6	1.16	0.25	0.53
ZCRB1	-2.94	0.0034	0.13	0.21	0.83	0.99	1.85	0.065	0.26
CDKN2C	-2.93	0.0035	0.13	-1.5	0.14	0.84	1.38	0.17	0.43
RIMS4	-2.93	0.0035	0.13	-1.12	0.26	0.9	4.4	1.3e-05	0.0016
SLC5A12	-2.93	0.0035	0.13	0.91	0.36	0.93	-0.97	0.33	0.61
FOXJ1	2.93	0.0035	0.13	0.95	0.34	0.92	0.78	0.44	0.7
FAM19A5	-2.95	0.0035	0.13	-1.49	0.14	0.84	1.92	0.055	0.24
ZNF500	-2.93	0.0035	0.13	-0.45	0.65	0.98	1.03	0.3	0.59
GOLGA1	-2.95	0.0035	0.13	-0.23	0.82	0.99	0.6	0.55	0.78
ZNF512B	2.95	0.0035	0.13	-0.1	0.92	1	-2.09	0.037	0.19
LRRC19	2.95	0.0035	0.13	0.84	0.4	0.94	-0.95	0.34	0.62
HIST2H2AC	2.93	0.0035	0.13	0.9	0.37	0.93	-1.46	0.14	0.4
CABP1	2.94	0.0035	0.13	0.88	0.38	0.93	-2.58	0.01	0.094
CCT7	-2.93	0.0036	0.13	0.03	0.97	1	0.81	0.42	0.69
SLC18B1	2.93	0.0036	0.13	0.17	0.87	1	-2.39	0.017	0.13
BBS9	-2.93	0.0036	0.13	-2.77	0.006	0.57	3.06	0.0024	0.043
APLP2	2.93	0.0036	0.13	1.8	0.073	0.79	-2.17	0.03	0.17
LRRC37A3	2.94	0.0036	0.13	-0.68	0.5	0.96	-0.66	0.51	0.75
LHX5	2.92	0.0036	0.13	-0.79	0.43	0.94	-1.26	0.21	0.48
XRCC3	2.92	0.0036	0.13	-1.41	0.16	0.86	-2.18	0.03	0.17
RUSC1	2.93	0.0037	0.14	1.53	0.13	0.83	-1.95	0.053	0.23
HEMGN	-2.92	0.0037	0.14	-2.37	0.018	0.63	2.98	0.0032	0.049
DPY19L2P1	2.93	0.0037	0.13	-3.28	0.0012	0.42	-1.93	0.054	0.24
PDLIM2	-2.92	0.0037	0.14	0.79	0.43	0.94	-0.46	0.64	0.84
MANEA	2.92	0.0037	0.13	-1.2	0.23	0.88	-0.24	0.81	0.92
GMEB1	-2.9	0.0038	0.14	-0.28	0.78	0.99	-0.51	0.61	0.81
EPHB4	2.9	0.0038	0.14	0.53	0.6	0.97	-0.51	0.61	0.81
H3F3C	-2.91	0.0038	0.14	0.46	0.64	0.98	0.71	0.48	0.73
INTS9	2.92	0.0038	0.14	1	0.32	0.92	-2.5	0.013	0.11
SEC62	-2.9	0.0038	0.14	0	1	1	0.01	0.99	1
TSPAN4	2.91	0.0038	0.14	1.16	0.24	0.89	-1.03	0.3	0.59
GGTLC1	-2.91	0.0038	0.14	1.49	0.14	0.84	1.06	0.29	0.57
MRPL52	-2.92	0.0039	0.14	0.08	0.94	1	3.06	0.0025	0.043
C17orf64	-2.91	0.0039	0.14	-0.26	0.79	0.99	3.37	0.00088	0.024
NFE2L1	2.9	0.0039	0.14	-0.78	0.44	0.94	-1.45	0.15	0.41
MRPS23	-2.91	0.0039	0.14	-0.11	0.91	1	2.14	0.033	0.18
PLD1	2.9	0.0039	0.14	0.31	0.75	0.99	-0.71	0.48	0.73
CNGB3	2.89	0.0039	0.14	0.84	0.4	0.94	-3.01	0.0027	0.046
PXN	2.91	0.0039	0.14	1.04	0.3	0.91	-2.01	0.045	0.22
ZNF696	-2.9	0.0039	0.14	-1.65	0.1	0.81	2.8	0.0053	0.066
DEPDC4	2.9	0.004	0.14	-0.77	0.44	0.94	-1.61	0.11	0.35
ZFP28	-2.89	0.004	0.14	-0.07	0.94	1	0.21	0.83	0.93
C3orf30	2.9	0.004	0.14	0.81	0.42	0.94	-1.12	0.26	0.54
TIMM8B	2.9	0.004	0.14	1.29	0.2	0.87	-1.8	0.073	0.28
MYL7	-2.89	0.004	0.14	0.09	0.93	1	2.82	0.005	0.064
EPS15L1	2.89	0.004	0.14	0.68	0.5	0.96	-2.2	0.028	0.17
UBALD2	-2.89	0.0041	0.14	-0.4	0.69	0.98	1.68	0.095	0.32
NCL	2.88	0.0041	0.14	-1.58	0.12	0.83	4.27	2.3e-05	0.0024
NGF	-2.88	0.0041	0.14	-0.26	0.79	0.99	2.57	0.01	0.096
HERC2	2.88	0.0041	0.14	0.77	0.44	0.94	0.68	0.5	0.74
HSFX4&HSFX3	-2.87	0.0042	0.14	-2.6	0.0095	0.58	3.05	0.0024	0.043
CREB3L4	2.87	0.0042	0.14	0.83	0.41	0.94	1.8	0.072	0.28
APCS	-2.89	0.0042	0.14	0.11	0.91	1	1.08	0.28	0.56
AUH	2.87	0.0042	0.14	-0.23	0.82	0.99	-1	0.32	0.6
GPALPP1	-2.89	0.0042	0.14	-0.93	0.35	0.93	1.34	0.18	0.45
TP53	-2.88	0.0042	0.14	0.4	0.69	0.98	-10.23	7.4e-23	4.2e-19
ZNF148	2.87	0.0042	0.14	0.23	0.82	0.99	-4.63	4.5e-06	0.0007
HNRNPCL4&HNRNPCL3	2.87	0.0043	0.14	-0.33	0.74	0.99	-1.75	0.08	0.3
SLC9A6	-2.87	0.0043	0.14	-1.5	0.13	0.84	4.04	6e-05	0.0044
PELP1	2.87	0.0043	0.15	0.96	0.34	0.92	0.54	0.59	0.8
KCNIP3	2.87	0.0043	0.14	0.93	0.35	0.93	0.04	0.97	0.99
EHD3	2.86	0.0043	0.15	0.32	0.75	0.99	0.41	0.68	0.86
KCTD4	2.87	0.0043	0.14	1.12	0.26	0.9	0.71	0.48	0.73
RAVER2	2.87	0.0043	0.15	1.25	0.21	0.88	0.31	0.75	0.9
TKT	2.87	0.0043	0.15	-2.34	0.019	0.63	2.03	0.043	0.21
LOC107987397	2.88	0.0044	0.15	1.7	0.089	0.8	-4.24	3.1e-05	0.0029
ZNF257	-2.86	0.0044	0.15	0.09	0.93	1	0.71	0.48	0.73
DDB2	-2.86	0.0044	0.15	0.23	0.81	0.99	2.88	0.0041	0.057
FBXL2	-2.86	0.0044	0.15	0.15	0.88	1	-2.73	0.0065	0.073
SERTAD4	2.86	0.0044	0.15	0.75	0.46	0.95	-2.19	0.029	0.17
KLF6	-2.85	0.0045	0.15	-1.04	0.3	0.91	0.39	0.69	0.86
MSTO1	-2.87	0.0045	0.15	-0.27	0.79	0.99	0.79	0.43	0.69
FAM167A	2.86	0.0045	0.15	1.46	0.15	0.85	0.57	0.57	0.79
ATP8B5P	2.85	0.0046	0.15	1.11	0.27	0.9	-2.75	0.0064	0.072
UBR4	2.85	0.0046	0.15	-0.82	0.42	0.94	-1.85	0.066	0.26
CENPK	-2.86	0.0046	0.15	-2.03	0.044	0.73	3.22	0.0015	0.032
E2F2	-2.83	0.0047	0.15	1.88	0.061	0.76	1.63	0.1	0.34
ZNF337	2.84	0.0047	0.15	-1.32	0.19	0.87	-0.7	0.48	0.73
HS1BP3	-2.85	0.0047	0.15	-1.07	0.28	0.9	0.95	0.34	0.62
YEATS4	-2.83	0.0047	0.15	-1.73	0.085	0.8	0.92	0.36	0.64
GSTO1	2.84	0.0047	0.15	-0.97	0.33	0.92	-1.09	0.27	0.56
FAM20B	-2.84	0.0047	0.15	-2.31	0.021	0.63	4.49	8.9e-06	0.0012
CEBPA	-2.83	0.0048	0.15	-1.43	0.15	0.85	2.9	0.0039	0.055
KCNK4-TEX40&KCNK4	2.83	0.0048	0.15	3.7	0.00023	0.26	-2.85	0.0045	0.06
SYT10	2.84	0.0048	0.15	0.05	0.96	1	0.17	0.86	0.95
SBDS	2.83	0.0048	0.15	-1.08	0.28	0.9	-0.05	0.96	0.98
IPO11	2.84	0.0048	0.15	-1.94	0.053	0.73	0.19	0.85	0.94
MRPS21	2.83	0.0048	0.15	0.18	0.86	0.99	-3.6	0.00035	0.014
ENAH	2.84	0.0048	0.15	-1.39	0.17	0.86	-1.04	0.3	0.58
SQOR	2.83	0.0048	0.15	1.91	0.056	0.75	-2.29	0.022	0.15
ITPRIP	-2.84	0.0048	0.15	1.05	0.3	0.91	1.93	0.054	0.24
TDRD12	-2.84	0.0048	0.15	0.59	0.56	0.97	1.68	0.093	0.32
TMEM94	-2.83	0.0048	0.15	-1.6	0.11	0.82	0.56	0.58	0.8
EFCAB14	2.84	0.0048	0.15	-1.79	0.074	0.79	-1.64	0.1	0.34
ABHD14A	2.83	0.0049	0.15	-0.85	0.4	0.94	0.76	0.45	0.71
MBTPS2	-2.83	0.0049	0.15	-1.22	0.22	0.88	0.34	0.73	0.88
RHOF	-2.82	0.0049	0.15	-0.05	0.96	1	1.1	0.27	0.55
SEC61A2	-2.84	0.0049	0.16	-0.06	0.95	1	1.76	0.079	0.29
OLFML3	-2.84	0.0049	0.15	0.17	0.86	0.99	2.07	0.04	0.2
RANBP1	2.83	0.0049	0.15	0.43	0.67	0.98	-1.34	0.18	0.45
LRRC14	-2.84	0.0049	0.16	0.83	0.41	0.94	3.37	0.00088	0.024
FOXA1	2.82	0.005	0.16	-1.11	0.27	0.9	0.92	0.36	0.63
ARSD	2.82	0.005	0.16	-0.76	0.45	0.94	-1.92	0.055	0.24
PPIAP30	-2.81	0.0051	0.16	-2	0.046	0.73	2.02	0.044	0.21
CDKN3	-2.81	0.0051	0.16	0.05	0.96	1	2.73	0.0066	0.074
ALOX12B	2.81	0.0051	0.16	0.05	0.96	1	0.65	0.51	0.75
H3F3B	2.81	0.0051	0.16	1.58	0.11	0.83	-2.52	0.012	0.1
MME	2.81	0.0051	0.16	-1.12	0.26	0.89	-1.73	0.085	0.31
OS9	-2.8	0.0052	0.16	0.49	0.62	0.97	0.6	0.55	0.78
IL24	2.81	0.0052	0.16	-0.32	0.75	0.99	-1.69	0.091	0.32
EDC4	-2.81	0.0052	0.16	-1.55	0.12	0.83	2.03	0.043	0.21
WDR91	-2.81	0.0052	0.16	-0.34	0.73	0.99	2.86	0.0044	0.059
HTR2C	2.81	0.0052	0.16	-1.52	0.13	0.83	-2.77	0.0058	0.069
OR2M7	2.81	0.0052	0.16	0.19	0.85	0.99	-3.03	0.0026	0.045
NDUFS2	2.81	0.0052	0.16	2.46	0.014	0.61	-3.41	0.00071	0.021
EMSY	2.81	0.0052	0.16	0.21	0.83	0.99	1.39	0.17	0.43
YAF2	2.8	0.0053	0.16	-0.22	0.83	0.99	0.73	0.47	0.72
ZNF100	-2.8	0.0053	0.16	-1.54	0.13	0.83	1.38	0.17	0.43
COL22A1	2.81	0.0053	0.16	-0.44	0.66	0.98	3.36	0.00087	0.024
KCNJ14	2.8	0.0053	0.16	1.36	0.17	0.86	-0.29	0.77	0.91
LCP2	-2.8	0.0053	0.16	0.25	0.8	0.99	0.92	0.36	0.63
TCEAL9	-2.81	0.0053	0.16	-0.31	0.76	0.99	3.12	0.002	0.037
AHSP	-2.81	0.0053	0.16	1.17	0.24	0.89	0.97	0.33	0.61
MRPS6	-2.81	0.0053	0.16	-0.39	0.7	0.98	2.2	0.029	0.17
RACK1	-2.79	0.0054	0.16	-0.68	0.5	0.96	3.04	0.0025	0.043
CETN2	2.79	0.0054	0.16	-0.52	0.6	0.97	2.91	0.0038	0.055
SUPT16H	2.79	0.0054	0.16	0.08	0.93	1	-0.12	0.91	0.96
CIB4	-2.8	0.0054	0.16	0.51	0.61	0.97	0.34	0.73	0.89
FAM161B	2.8	0.0054	0.16	-0.74	0.46	0.95	-2	0.047	0.22
FFAR4	2.79	0.0054	0.16	0.11	0.91	1	-3.22	0.0013	0.03
VPS54	-2.8	0.0054	0.16	-1.82	0.069	0.78	2.47	0.014	0.11
NSMCE4A	-2.8	0.0054	0.16	0.7	0.48	0.95	-0.21	0.83	0.93
TAF10	-2.8	0.0054	0.16	-1.23	0.22	0.88	0.5	0.62	0.82
METTL18	-2.81	0.0054	0.16	0.4	0.69	0.98	0.28	0.78	0.91
PRAG1	-2.79	0.0055	0.16	1.56	0.12	0.83	1.06	0.29	0.57
DAGLB	-2.79	0.0055	0.16	-1.08	0.28	0.9	2.65	0.0086	0.086
SLC17A5	-2.79	0.0055	0.16	0.09	0.93	1	1.48	0.14	0.4
SPRN	-2.8	0.0055	0.16	-0.46	0.65	0.98	2.99	0.003	0.048
THUMPD2	-2.79	0.0055	0.16	0.27	0.78	0.99	1.09	0.28	0.56
WWP2	2.78	0.0056	0.16	-1.45	0.15	0.85	-0.64	0.52	0.76
ERBB2	2.78	0.0056	0.16	0.27	0.79	0.99	-2.29	0.022	0.14
FOLH1	2.78	0.0056	0.16	-0.82	0.41	0.94	-1.11	0.27	0.55
GTF2A2	-2.78	0.0056	0.16	-0.95	0.34	0.92	2.57	0.01	0.095
PCDH12	2.78	0.0056	0.16	-3.03	0.0026	0.51	0.23	0.82	0.93
CMBL	-2.78	0.0057	0.17	0.06	0.95	1	0.02	0.99	0.99
APEX1	2.78	0.0057	0.16	-1.72	0.086	0.8	-0.26	0.79	0.92
SCLY	2.78	0.0057	0.17	-0.13	0.9	1	-2.72	0.0068	0.075
TMEM11	2.77	0.0057	0.17	0.47	0.64	0.98	-1.79	0.074	0.28
C9orf85	-2.78	0.0058	0.17	0.38	0.7	0.98	2.3	0.022	0.14
WSCD1	-2.77	0.0058	0.17	0	1	1	0.66	0.51	0.75
UBBP4	-2.77	0.0058	0.17	0.09	0.93	1	-2.2	0.028	0.17
CAPN8	-2.77	0.0058	0.17	-1.3	0.19	0.87	-0.26	0.79	0.92
MYL4	-2.77	0.0058	0.17	-0.34	0.74	0.99	1.94	0.053	0.23
PAX9	-2.77	0.0058	0.17	0.3	0.76	0.99	0.02	0.99	0.99
CACNG1	2.77	0.0058	0.17	1.56	0.12	0.83	-1.57	0.12	0.36
HYDIN2	-2.77	0.0059	0.17	2.13	0.034	0.69	0.23	0.82	0.93
LOC107987545&OR2A7&OR2A4	-2.77	0.0059	0.17	-0.77	0.44	0.94	-0.98	0.33	0.61
CPT1A	2.76	0.0059	0.17	0.3	0.76	0.99	-1.44	0.15	0.41
KRT27	2.77	0.0059	0.17	-1.85	0.065	0.77	-2.85	0.0047	0.062
NDUFS1	2.77	0.0059	0.17	0.8	0.42	0.94	-0.17	0.86	0.95
SNRK	2.76	0.0059	0.17	0.14	0.89	1	-2.39	0.017	0.13
BMP8B	-2.76	0.0059	0.17	1.23	0.22	0.88	-0.09	0.93	0.97
TPI1P3	2.76	0.0059	0.17	-1.07	0.29	0.9	-2.94	0.0034	0.051
E2F8	2.77	0.0059	0.17	1.73	0.084	0.8	-2.3	0.022	0.14
CENPT	-2.78	0.0059	0.17	-1.78	0.076	0.8	1.81	0.071	0.28
PSMG1	2.77	0.0059	0.17	1.43	0.15	0.85	-1.65	0.1	0.33
PDE5A	2.76	0.0059	0.17	1.48	0.14	0.84	-1.18	0.24	0.52
MAPK1IP1L	2.78	0.0059	0.17	-0.42	0.68	0.98	-2.84	0.0048	0.063
LOC107984058	2.76	0.006	0.17	0.39	0.69	0.98	-0.8	0.42	0.69
CHRND	-2.76	0.006	0.17	0.13	0.9	1	0.54	0.59	0.8
ZNF827	2.77	0.006	0.17	0.67	0.51	0.96	-1.13	0.26	0.54
CAND2	-2.76	0.006	0.17	1.39	0.16	0.86	1.97	0.049	0.23
RAB5A	2.76	0.006	0.17	-1.33	0.18	0.87	-0.37	0.71	0.87
RPL3L	-2.77	0.006	0.17	-2.13	0.034	0.69	0.82	0.41	0.68
BMP5	-2.76	0.006	0.17	0.27	0.78	0.99	-1.47	0.14	0.4
ALYREF	-2.75	0.0061	0.17	-1.14	0.26	0.89	1.44	0.15	0.41
SPTLC1	2.75	0.0061	0.17	-0.05	0.96	1	-0.19	0.85	0.94
LILRB4	-2.75	0.0061	0.17	0.94	0.35	0.93	1.01	0.31	0.6
CTHRC1	2.75	0.0061	0.17	1.38	0.17	0.86	-2.37	0.018	0.13
TRIM32	2.75	0.0061	0.17	0.52	0.61	0.97	-1.74	0.083	0.3
RGPD1	-2.75	0.0061	0.17	0.05	0.96	1	2.3	0.022	0.14
RAG1	-2.75	0.0061	0.17	-1.16	0.25	0.89	3.14	0.0018	0.035
STIL	2.75	0.0061	0.17	0.93	0.35	0.93	0.74	0.46	0.72
FBXO30	-2.76	0.0061	0.17	0.89	0.38	0.93	0.47	0.64	0.83
FAM58A	2.75	0.0061	0.17	1.31	0.19	0.87	0.82	0.41	0.68
C7orf55-LUC7L2	-2.75	0.0062	0.17	0.13	0.9	1	-0.5	0.62	0.82
CTSB	2.75	0.0062	0.17	1.07	0.29	0.9	-1.66	0.097	0.33
NSL1	-2.76	0.0062	0.17	-0.26	0.79	0.99	2.75	0.0063	0.072
OR4E2	2.75	0.0062	0.17	2.39	0.017	0.63	-1	0.32	0.6
SMTNL2	-2.76	0.0062	0.17	-0.91	0.37	0.93	0.61	0.54	0.77
IFNA4	2.75	0.0062	0.17	0.58	0.57	0.97	-1.12	0.26	0.54
PIGH	-2.76	0.0062	0.17	-1.45	0.15	0.85	2.61	0.0095	0.09
NOL8	2.76	0.0062	0.17	0.82	0.41	0.94	-0.6	0.55	0.78
WRNIP1	2.74	0.0062	0.17	-0.46	0.65	0.98	-2.99	0.0029	0.047
ST3GAL4	2.75	0.0062	0.17	-0.79	0.43	0.94	-0.64	0.52	0.76
TCP11	-2.76	0.0062	0.17	-1.77	0.078	0.8	2.33	0.021	0.14
WDR26	-2.75	0.0062	0.17	0.79	0.43	0.94	1.6	0.11	0.35
KCNK6	-2.75	0.0062	0.17	-0.11	0.91	1	-0.26	0.8	0.92
DUSP19	2.74	0.0063	0.17	-0.33	0.74	0.99	-0.43	0.67	0.85
GPR180	-2.74	0.0063	0.17	-2.09	0.037	0.7	1.86	0.063	0.26
CALML6	-2.74	0.0063	0.17	-0.98	0.33	0.92	1.93	0.054	0.24
OR1S2	2.74	0.0063	0.17	-0.38	0.7	0.98	0.53	0.6	0.81
HELLS	2.74	0.0063	0.17	-0.18	0.86	0.99	0.7	0.48	0.73
HLA-J	-2.74	0.0063	0.17	-0.18	0.86	0.99	3.88	0.00012	0.0065
C1orf186	2.75	0.0063	0.17	1.71	0.088	0.8	-2.01	0.045	0.21
SUCNR1	-2.74	0.0063	0.17	-0.61	0.54	0.97	1.18	0.24	0.52
LGR5	-2.74	0.0063	0.17	-0.66	0.51	0.96	0.14	0.89	0.95
CDK8	2.73	0.0064	0.17	1.41	0.16	0.86	-2.65	0.0082	0.084
MDS2	2.75	0.0064	0.17	-0.37	0.71	0.98	0.75	0.45	0.71
PLBD1	2.75	0.0064	0.17	1.54	0.12	0.83	-3.64	0.00033	0.013
SERINC3	2.73	0.0065	0.17	-0.48	0.63	0.98	-2.65	0.0083	0.084
IGFL2	2.74	0.0065	0.17	-0.21	0.83	0.99	-0.56	0.57	0.79
RNF168	2.73	0.0065	0.17	1.02	0.31	0.91	-1.66	0.097	0.33
DRD1	2.73	0.0065	0.17	0.07	0.95	1	-0.59	0.55	0.78
EPHA5	-2.73	0.0065	0.17	-1.87	0.062	0.76	-0.5	0.62	0.82
EXOC4	2.74	0.0065	0.17	0.89	0.37	0.93	-3.31	0.0011	0.026
SLC25A14	2.73	0.0065	0.17	-0.18	0.85	0.99	-1.47	0.14	0.4
VPS26A	2.74	0.0065	0.17	-1	0.32	0.91	-2.05	0.041	0.2
SPECC1L-ADORA2A	2.73	0.0066	0.17	0.92	0.36	0.93	-2.08	0.038	0.19
CTAGE10P	2.74	0.0066	0.17	1.92	0.055	0.75	-3.31	0.0011	0.026
RRBP1	-2.74	0.0066	0.17	1.88	0.06	0.76	1.3	0.19	0.47
CDC27	-2.73	0.0066	0.17	0.76	0.44	0.94	-0.15	0.88	0.95
ADCYAP1R1	2.73	0.0067	0.17	-0.6	0.55	0.97	-0.51	0.61	0.81
KIF19	2.72	0.0067	0.17	0.43	0.67	0.98	-2.23	0.026	0.16
OR2M5	-2.73	0.0067	0.17	0.23	0.82	0.99	3.5	0.00053	0.018
HSPA9	-2.73	0.0067	0.17	-1.62	0.11	0.82	1.62	0.11	0.34
PHF21A	2.72	0.0067	0.17	-1.03	0.3	0.91	-1.17	0.24	0.52
HBP1	-2.72	0.0068	0.17	1.95	0.052	0.73	-0.44	0.66	0.84
LRRC30	2.72	0.0068	0.17	-1.25	0.21	0.88	-0.65	0.51	0.75
PYCR3	-2.72	0.0068	0.17	1.2	0.23	0.88	1.37	0.17	0.44
SPG11	2.73	0.0068	0.17	-1.43	0.15	0.85	-1.87	0.062	0.26
PLPP2	-2.72	0.0068	0.17	1.41	0.16	0.86	-1.13	0.26	0.54
DLGAP1	-2.72	0.0068	0.17	0.88	0.38	0.93	1.83	0.068	0.27
ATP6V0E2	-2.71	0.0069	0.17	-0.16	0.87	1	1.11	0.27	0.55
HERC2P3	-2.71	0.0069	0.17	-0.77	0.44	0.94	2.16	0.031	0.17
FREM2	2.71	0.0069	0.17	-0.18	0.86	0.99	1.85	0.065	0.26
PODXL	-2.72	0.0069	0.17	-0.8	0.43	0.94	2.42	0.016	0.12
ANKH	-2.71	0.0069	0.17	0.81	0.42	0.94	0.27	0.79	0.91
CDH26	2.71	0.0069	0.17	1.01	0.31	0.91	-1.28	0.2	0.48
BMI1	-2.71	0.0069	0.17	-1.64	0.1	0.81	3.83	0.00014	0.0073
ASZ1	-2.72	0.007	0.17	-0.51	0.61	0.97	0.29	0.78	0.91
ZNF583	-2.71	0.007	0.17	-0.36	0.72	0.98	2.96	0.0032	0.049
JAKMIP1	-2.72	0.007	0.17	-0.68	0.5	0.96	3.03	0.0027	0.046
SMG5	2.72	0.007	0.17	-0.99	0.33	0.92	0.75	0.46	0.71
NSD2	-2.7	0.007	0.17	0.5	0.62	0.97	1.1	0.27	0.55
SMYD5	-2.7	0.0071	0.18	0.71	0.48	0.95	0.25	0.8	0.92
NPC1L1	-2.71	0.0071	0.18	-0.36	0.72	0.98	0.29	0.77	0.91
SLC22A2	2.7	0.0071	0.18	0.41	0.68	0.98	-0.93	0.35	0.63
KRBA2	-2.7	0.0072	0.18	0.2	0.84	0.99	2.24	0.026	0.16
FAM120A	2.7	0.0072	0.18	0.86	0.39	0.94	-4.09	5.1e-05	0.004
KRT33A	-2.71	0.0072	0.18	-1.36	0.18	0.86	3	0.0029	0.047
VPS35	2.71	0.0072	0.18	-2.8	0.0055	0.57	-1.81	0.072	0.28
MIER1	-2.7	0.0072	0.18	0.28	0.78	0.99	-0.13	0.9	0.96
CFB	-2.7	0.0072	0.18	1.17	0.24	0.89	-0.06	0.95	0.98
NKAIN1	-2.7	0.0072	0.18	1.88	0.061	0.76	0.15	0.88	0.95
RNF10	2.7	0.0072	0.18	0.41	0.69	0.98	-1.5	0.13	0.39
SLC25A35	-2.71	0.0073	0.18	-0.39	0.7	0.98	0.4	0.69	0.86
RUFY1	-2.69	0.0073	0.18	0.53	0.59	0.97	0.49	0.62	0.82
HACD1	-2.69	0.0073	0.18	-0.99	0.32	0.92	2.26	0.024	0.15
PIP5KL1	-2.69	0.0074	0.18	-0.95	0.34	0.92	2.02	0.044	0.21
PTPRVP	-2.69	0.0074	0.18	-0.9	0.37	0.93	2.42	0.016	0.12
NKAIN3	2.7	0.0074	0.18	0.13	0.9	1	-3	0.003	0.048
SOAT2	-2.69	0.0074	0.18	-0.07	0.94	1	1.83	0.068	0.27
ABLIM2	-2.7	0.0074	0.18	0.52	0.6	0.97	1.12	0.26	0.55
RBM17	2.69	0.0074	0.18	0.09	0.93	1	-0.68	0.5	0.74
PHYKPL	-2.69	0.0074	0.18	-2.62	0.0091	0.58	1.92	0.055	0.24
AATK	-2.69	0.0074	0.18	0.13	0.9	1	-0.21	0.84	0.94
LOC105374601	-2.69	0.0075	0.18	-0.5	0.62	0.97	0.35	0.72	0.88
CDY1B&CDY1	2.68	0.0075	0.18	1.59	0.11	0.83	-2.74	0.0063	0.072
ADGRA2	2.68	0.0075	0.18	-1.03	0.3	0.91	-0.12	0.9	0.96
C1QTNF12	2.69	0.0075	0.18	0.4	0.69	0.98	-0.61	0.54	0.77
ARL6IP4	2.69	0.0075	0.18	-0.87	0.38	0.93	-1.73	0.085	0.31
EDN3	2.69	0.0076	0.18	-0.35	0.73	0.98	-3.52	0.0005	0.017
C1orf53	-2.69	0.0076	0.18	-0.51	0.61	0.97	0.08	0.94	0.97
PCDHA2	2.68	0.0076	0.18	-0.35	0.72	0.98	-1.1	0.27	0.55
PLPP7	2.68	0.0076	0.18	1.25	0.21	0.88	-3.4	0.00074	0.021
ANKRD45	-2.68	0.0077	0.18	0.07	0.94	1	4.85	2e-06	0.00042
CLGN	2.67	0.0078	0.18	-1.34	0.18	0.86	-0.66	0.51	0.75
WFIKKN1	2.68	0.0078	0.18	-0.09	0.93	1	1.17	0.24	0.52
C4orf36	-2.68	0.0078	0.18	1.67	0.096	0.81	0.76	0.45	0.71
CABIN1	-2.68	0.0078	0.18	-0.18	0.86	0.99	1.78	0.076	0.29
PTHLH	2.67	0.0078	0.18	-1.03	0.3	0.91	-2.69	0.0074	0.079
NME1-NME2	2.67	0.0078	0.18	-0.9	0.37	0.93	1.97	0.05	0.23
TLR5	2.67	0.0078	0.18	-0.44	0.66	0.98	-1.53	0.13	0.38
CETN1	-2.67	0.0079	0.19	-0.05	0.96	1	1.14	0.26	0.54
ADAMTS5	-2.67	0.0079	0.19	-0.93	0.35	0.93	1.13	0.26	0.54
ZNF718	2.68	0.0079	0.18	2.08	0.038	0.71	-2.6	0.0099	0.093
LSP1	-2.68	0.0079	0.19	1.4	0.16	0.86	2.49	0.013	0.11
MRAP	2.67	0.0079	0.19	0.02	0.99	1	-2.39	0.017	0.13
TAT	2.66	0.0079	0.19	0.15	0.88	1	1.33	0.18	0.46
RNF167	2.66	0.008	0.19	0.28	0.78	0.99	-0.71	0.48	0.73
TMEM104	-2.67	0.008	0.19	0.34	0.73	0.99	2.23	0.026	0.16
AGK	2.67	0.008	0.19	0.11	0.91	1	-1.94	0.054	0.24
BBOX1	2.66	0.008	0.19	1.5	0.13	0.84	-4.22	2.8e-05	0.0027
FCRL1	-2.66	0.0081	0.19	1.98	0.048	0.73	-0.3	0.76	0.9
GLDN	2.66	0.0081	0.19	-0.86	0.39	0.94	0.69	0.49	0.74
NIPAL3	2.66	0.0081	0.19	-1	0.32	0.91	0.38	0.7	0.87
SDHD	2.66	0.0081	0.19	0.61	0.54	0.97	-0.08	0.93	0.97
SRP19	2.66	0.0081	0.19	-1.11	0.27	0.9	-0.9	0.37	0.64
THNSL1	2.66	0.0081	0.19	-0.79	0.43	0.94	-0.89	0.38	0.65
RNFT2	2.66	0.0081	0.19	1.54	0.12	0.83	-3	0.0029	0.047
ZNF579	2.66	0.0082	0.19	0.72	0.47	0.95	0.65	0.52	0.76
ANGPTL8	2.66	0.0082	0.19	-0.52	0.6	0.97	0.41	0.68	0.86
CYP4F3	2.65	0.0083	0.19	1.92	0.055	0.75	-4.28	2.2e-05	0.0023
NCOR2	2.65	0.0083	0.19	-0.61	0.54	0.97	-3.12	0.0019	0.037
KCNQ1OT1	2.65	0.0084	0.19	-0.49	0.62	0.97	-2.04	0.042	0.21
MGST2	2.65	0.0084	0.19	-0.51	0.61	0.97	-3.43	0.0007	0.021
RGS13	2.65	0.0084	0.19	-1.18	0.24	0.89	-0.03	0.98	0.99
CBFA2T3	-2.64	0.0084	0.19	-0.54	0.59	0.97	-0.12	0.91	0.96
NUAK1	2.64	0.0084	0.19	0	1	1	-1.44	0.15	0.41
TRIM60	-2.64	0.0085	0.19	0.89	0.37	0.93	3.27	0.0012	0.027
KLHL18	-2.64	0.0085	0.19	0.4	0.69	0.98	0.97	0.33	0.61
LAMP5	2.64	0.0085	0.19	1.23	0.22	0.88	-0.13	0.9	0.96
VHLL	-2.64	0.0085	0.19	-0.63	0.53	0.96	0.02	0.99	0.99
PLEKHA1	-2.65	0.0085	0.19	0.64	0.52	0.96	2.98	0.0032	0.049
RNASEH2C	-2.65	0.0085	0.19	0.12	0.9	1	2.65	0.0085	0.086
BRSK1	2.64	0.0085	0.19	-0.93	0.35	0.93	1.11	0.27	0.55
ANAPC4	-2.64	0.0086	0.19	0.66	0.51	0.96	-2.2	0.028	0.16
MDM4	2.64	0.0086	0.19	-1.75	0.081	0.8	10.34	2.9e-23	2.5e-19
ZNF624	2.64	0.0086	0.19	1.83	0.068	0.78	-1.41	0.16	0.42
NDST3	2.64	0.0086	0.19	1.79	0.075	0.8	-0.98	0.33	0.61
CLPS	2.63	0.0087	0.19	-2.15	0.032	0.68	-1.12	0.26	0.54
CCR5	-2.63	0.0087	0.19	-0.17	0.86	0.99	-0.5	0.62	0.82
PCDHB5	-2.63	0.0087	0.19	-1.5	0.13	0.83	3.28	0.0011	0.027
OR13G1	-2.64	0.0087	0.19	0.2	0.84	0.99	2.29	0.023	0.15
SPHKAP	-2.63	0.0087	0.19	0.91	0.36	0.93	-1.36	0.17	0.44
CALHM3	-2.64	0.0088	0.2	-1.59	0.11	0.83	1.97	0.05	0.23
ARHGAP27	-2.63	0.0088	0.2	-0.88	0.38	0.93	0.01	0.99	1
ORC4	-2.63	0.0088	0.2	0.66	0.51	0.96	1.98	0.049	0.22
RBL2	2.63	0.0088	0.2	1.86	0.063	0.77	-0.87	0.39	0.66
THBS4	2.63	0.0088	0.2	2	0.046	0.73	-2.69	0.0075	0.079
CCDC28B	-2.64	0.0088	0.2	0.26	0.8	0.99	0.98	0.33	0.61
GABPB2	2.62	0.0089	0.2	1.78	0.076	0.8	-1.04	0.3	0.58
RC3H1	2.63	0.0089	0.2	0.35	0.72	0.98	-1.54	0.13	0.38
HUS1	2.63	0.0089	0.2	0.07	0.95	1	-0.18	0.86	0.95
ITGA9	2.63	0.0089	0.2	0.61	0.55	0.97	-0.62	0.53	0.77
PA2G4	2.63	0.0089	0.2	2.29	0.022	0.64	-4.01	6.9e-05	0.0047
MS4A7	-2.63	0.0089	0.2	0.6	0.55	0.97	1.59	0.11	0.36
SOD1	2.62	0.0089	0.2	0.58	0.56	0.97	0.31	0.76	0.9
VIM	2.62	0.0089	0.2	0.45	0.65	0.98	0.44	0.66	0.84
PLAC1	-2.63	0.009	0.2	-0.55	0.58	0.97	1.63	0.1	0.34
PHF23	-2.62	0.009	0.2	1.9	0.057	0.75	0.52	0.6	0.81
IRX6	2.62	0.009	0.2	-0.88	0.38	0.93	-0.39	0.7	0.87
LRSAM1	-2.62	0.009	0.2	-0.41	0.69	0.98	0.54	0.59	0.8
ERBB3	2.61	0.0091	0.2	-1.3	0.19	0.87	-2.76	0.0059	0.069
XRN2	2.62	0.0091	0.2	-0.8	0.43	0.94	-0.68	0.5	0.74
SLC25A19	-2.62	0.0091	0.2	-0.12	0.91	1	0.59	0.56	0.78
NT5DC2	-2.63	0.0091	0.2	0.9	0.37	0.93	1.33	0.18	0.46
DEGS1	-2.62	0.0091	0.2	-0.98	0.33	0.92	1.86	0.063	0.26
CLEC4C	-2.62	0.0092	0.2	-0.1	0.92	1	0.91	0.36	0.64
SPATS1	-2.62	0.0092	0.2	1.36	0.17	0.86	-0.21	0.83	0.93
RAB3GAP1	-2.61	0.0092	0.2	1.75	0.08	0.8	1.48	0.14	0.4
ABCA5	-2.61	0.0092	0.2	0.06	0.95	1	0.45	0.65	0.84
FBXO8	-2.61	0.0092	0.2	-1.05	0.29	0.91	2.75	0.0062	0.071
SAMD12	2.62	0.0092	0.2	-0.57	0.57	0.97	-1.45	0.15	0.41
DACT1	2.63	0.0092	0.2	2.31	0.021	0.63	-3.49	0.00056	0.019
CD63	2.61	0.0092	0.2	-1	0.32	0.91	-1.22	0.22	0.5
LRRC23	-2.61	0.0093	0.2	1.27	0.21	0.88	3.97	8.3e-05	0.0052
CILP2	2.62	0.0094	0.2	1.03	0.3	0.91	-1.32	0.19	0.46
CRCP	2.61	0.0094	0.2	0.01	0.99	1	-2.56	0.011	0.097
PTGER4	2.6	0.0094	0.2	-0.13	0.9	1	-1.54	0.12	0.37
NDST4	2.6	0.0094	0.2	-1.09	0.28	0.9	-0.87	0.38	0.66
TSPAN2	-2.61	0.0095	0.2	0.39	0.7	0.98	1.15	0.25	0.53
FBXO10	2.61	0.0095	0.2	-0.7	0.48	0.95	2.11	0.036	0.19
AQP7	-2.61	0.0095	0.2	-0.44	0.66	0.98	1.62	0.11	0.34
ATG101	-2.61	0.0095	0.2	-0.02	0.98	1	1.64	0.1	0.34
RPS6KA2	2.6	0.0095	0.2	1.79	0.074	0.79	-0.85	0.4	0.67
VOPP1	2.6	0.0095	0.2	0.5	0.62	0.97	-2.99	0.0029	0.047
MAP2K6	-2.6	0.0096	0.2	-1.05	0.3	0.91	3.09	0.0021	0.038
COQ9	-2.61	0.0096	0.2	0.26	0.8	0.99	1.9	0.059	0.25
DAZ2	-2.6	0.0096	0.2	-0.25	0.8	0.99	1.53	0.13	0.38
PGA4	-2.6	0.0096	0.2	-0.56	0.58	0.97	1.18	0.24	0.52
EIF1AD	-2.61	0.0096	0.2	-2.39	0.018	0.63	2.93	0.0036	0.053
GALNTL5	2.6	0.0097	0.2	0.4	0.69	0.98	-2.79	0.0055	0.067
ANO6	-2.6	0.0097	0.2	-0.06	0.95	1	3.54	0.00046	0.016
MTOR	2.59	0.0097	0.2	-1.24	0.21	0.88	-1.46	0.14	0.4
NEB	-2.59	0.0097	0.2	1.97	0.05	0.73	-0.35	0.73	0.88
OPN1MW	-2.59	0.0098	0.2	-0.41	0.68	0.98	-0.1	0.92	0.97
MAGEA9	-2.59	0.0098	0.2	0.87	0.38	0.93	1.59	0.11	0.36
SLC6A8	2.59	0.0098	0.2	0.32	0.75	0.99	-2.63	0.0089	0.088
ZXDA	-2.6	0.0098	0.2	-0.07	0.95	1	2.55	0.011	0.099
EMC3-AS1	-2.59	0.0099	0.21	-0.3	0.76	0.99	0.49	0.63	0.82
FZR1	-2.59	0.0099	0.21	-0.43	0.67	0.98	-1.91	0.057	0.24
GOLGA6L3&GOLGA6L19&LOC102724093&LOC102724117&GOLGA6L5P&GOLGA6L9&GOLGA6L17P&GOLGA6L4&GOLGA6L10	-2.58	0.01	0.21	0.36	0.72	0.98	0.95	0.34	0.62
POSTN	2.58	0.01	0.21	1.44	0.15	0.85	-2.54	0.011	0.1
CSF2RA	2.57	0.01	0.21	-1.07	0.29	0.9	-2.89	0.004	0.056
MS4A2	2.58	0.01	0.21	1.9	0.058	0.75	0.39	0.7	0.87
ALDOA	-2.57	0.01	0.21	0.87	0.38	0.93	1.75	0.081	0.3
GALNT2	-2.57	0.01	0.21	-1.02	0.31	0.91	1.45	0.15	0.41
SH2B1	-2.59	0.01	0.21	-1.01	0.32	0.91	-1.36	0.17	0.44
LMO7	-2.58	0.01	0.21	-1.61	0.11	0.82	5.22	2.5e-07	9.9e-05
MDM2	2.57	0.01	0.21	-0.48	0.63	0.98	12.14	1.2e-30	2.1e-26
TRIM51HP	-2.57	0.01	0.21	-0.88	0.38	0.93	2.93	0.0035	0.052
PRAMEF25&PRAMEF26	2.58	0.01	0.21	0.09	0.93	1	-2.28	0.023	0.15
MYF5	-2.58	0.01	0.21	0.26	0.79	0.99	0.9	0.37	0.64
ATP2B2	2.58	0.01	0.21	0.94	0.35	0.93	-1.35	0.18	0.44
RFWD3	2.57	0.01	0.21	0.14	0.89	1	-1.69	0.092	0.32
TTC27	-2.58	0.01	0.21	0.38	0.7	0.98	2	0.046	0.22
NAXD	2.58	0.01	0.21	-2.42	0.016	0.62	-0.18	0.85	0.94
VPS18	2.59	0.01	0.21	-0.8	0.42	0.94	-0.19	0.85	0.94
ABCC6P1	2.59	0.01	0.21	-0.13	0.89	1	-0.67	0.5	0.75
BMP6	-2.58	0.01	0.21	-0.19	0.85	0.99	2.54	0.011	0.1
UBA52	2.58	0.01	0.21	-0.7	0.48	0.95	-1.45	0.15	0.41
EIF4H	2.57	0.01	0.21	-1.48	0.14	0.84	-0.25	0.8	0.92
KMT2D	2.57	0.01	0.21	-1.03	0.31	0.91	-0.32	0.75	0.89
PROM1	2.58	0.01	0.21	2.21	0.028	0.66	-0.44	0.66	0.85
NAV2	2.58	0.01	0.21	0.84	0.4	0.94	-1.13	0.26	0.54
STBD1	-2.59	0.01	0.21	-1.74	0.084	0.8	2.93	0.0036	0.053
SLC16A6	-2.57	0.01	0.21	-0.49	0.62	0.97	-1.4	0.16	0.43
CXorf40A	-2.59	0.01	0.21	-0.02	0.98	1	2.4	0.017	0.13
LIPG	2.58	0.01	0.21	1.73	0.085	0.8	-0.69	0.49	0.74
RALGPS1	2.58	0.01	0.21	1.04	0.3	0.91	-1.84	0.067	0.27
TTC37	2.57	0.01	0.21	-0.2	0.84	0.99	-1.4	0.16	0.43
SAA2-SAA4	2.54	0.011	0.22	-0.82	0.41	0.94	-0.86	0.39	0.66
MIA-RAB4B	2.56	0.011	0.21	-0.35	0.73	0.98	1.41	0.16	0.42
LOC102723930&LOC105369184&LOC107984810	2.56	0.011	0.21	0.5	0.61	0.97	0.1	0.92	0.97
CDX4	2.56	0.011	0.21	2.52	0.012	0.6	0.48	0.63	0.83
POLD3	2.55	0.011	0.21	0.12	0.9	1	1.06	0.29	0.57
LOC107984126	-2.56	0.011	0.21	0.47	0.64	0.98	0.88	0.38	0.65
VSIG4	2.57	0.011	0.21	0.32	0.75	0.99	1.8	0.073	0.28
MSI2	2.54	0.011	0.21	-0.22	0.83	0.99	3.86	0.00012	0.0067
MPLKIP	-2.56	0.011	0.21	-0.25	0.81	0.99	-0.34	0.74	0.89
IL34	2.57	0.011	0.21	-0.19	0.85	0.99	-4.29	2.5e-05	0.0025
FAM187B	-2.55	0.011	0.21	1.13	0.26	0.89	-0.04	0.97	0.99
C1orf64	2.56	0.011	0.21	0.63	0.53	0.96	-1.71	0.088	0.31
SNRNP48	2.57	0.011	0.21	1.93	0.055	0.75	-0.39	0.7	0.87
IBA57	2.57	0.011	0.21	0.95	0.35	0.92	-0.11	0.91	0.97
N4BP3	-2.56	0.011	0.21	-0.01	0.99	1	-0.16	0.87	0.95
TSPYL4	2.56	0.011	0.21	-0.14	0.89	1	-0.8	0.42	0.69
ATMIN	2.57	0.011	0.21	1.63	0.1	0.82	-1.27	0.2	0.48
PIP5K1C	2.57	0.011	0.21	2.19	0.029	0.67	-1.93	0.054	0.24
BACE1	-2.55	0.011	0.21	0.72	0.47	0.95	1.94	0.053	0.24
EIF3K	2.55	0.011	0.22	-2.38	0.018	0.63	-1.1	0.27	0.55
GLRX	-2.55	0.011	0.21	0.23	0.82	0.99	-0.29	0.77	0.91
HID1	-2.54	0.011	0.22	0.33	0.74	0.99	0.91	0.36	0.64
ZFP41	-2.55	0.011	0.21	-0.01	0.99	1	0.68	0.49	0.74
HLA-DRA	-2.55	0.011	0.21	-1.39	0.16	0.86	-0.49	0.63	0.82
HPD	-2.53	0.011	0.22	1.22	0.22	0.88	-2.3	0.022	0.14
IFIT3	2.55	0.011	0.21	1.08	0.28	0.9	-0.35	0.72	0.88
IGF2	2.56	0.011	0.21	1.62	0.11	0.82	-5.3	1.7e-07	7.4e-05
CCL15-CCL14	-2.55	0.011	0.21	0.83	0.41	0.94	1.63	0.1	0.34
TEX38	2.55	0.011	0.21	-0.14	0.89	1	-5.32	2.3e-07	9.6e-05
PCP4	-2.57	0.011	0.21	0.16	0.88	1	1.68	0.094	0.32
ABI3	2.56	0.011	0.21	0.57	0.57	0.97	-1.18	0.24	0.52
EXOSC4	-2.55	0.011	0.21	-1.45	0.15	0.85	1.33	0.18	0.45
EPB41L4B	-2.54	0.011	0.21	0.9	0.37	0.93	-0.1	0.92	0.97
ELOVL2	2.56	0.011	0.21	-0.34	0.74	0.99	-3.09	0.0021	0.038
KLK15	2.56	0.011	0.21	0.89	0.38	0.93	-0.89	0.38	0.65
PRKAR1A	-2.56	0.011	0.21	-1.07	0.28	0.9	-0.99	0.32	0.6
DMAP1	-2.57	0.011	0.21	-1.52	0.13	0.83	3.47	0.00055	0.018
PSMB10	-2.54	0.011	0.22	-1.21	0.23	0.88	1.85	0.065	0.26
TBX20	2.54	0.011	0.21	1.49	0.14	0.84	-1.61	0.11	0.35
PSMD4	2.55	0.011	0.21	1.54	0.12	0.83	-1.58	0.11	0.36
ABHD4	2.56	0.011	0.21	-0.61	0.54	0.97	1.64	0.1	0.34
DLGAP1-AS1	2.56	0.011	0.21	0.44	0.66	0.98	-0.37	0.71	0.88
GOLGA8O	-2.57	0.011	0.21	0.33	0.74	0.99	0.72	0.47	0.72
TYROBP	2.56	0.011	0.21	-0.28	0.78	0.99	-1.13	0.26	0.54
RPAP3	-2.56	0.011	0.21	-0.66	0.51	0.96	0.37	0.71	0.87
VPS37B	-2.57	0.011	0.21	0.37	0.71	0.98	1.63	0.1	0.34
STAM	2.54	0.011	0.21	-0.2	0.84	0.99	1.29	0.2	0.47
CMIP	2.55	0.011	0.21	-1.3	0.19	0.87	-3.33	0.00098	0.025
COX4I2	-2.54	0.011	0.22	2.03	0.043	0.73	0.41	0.69	0.86
ZNF587	2.54	0.011	0.21	-0.03	0.97	1	0.9	0.37	0.64
RSPH1	2.55	0.011	0.21	0.89	0.37	0.93	-0.88	0.38	0.66
ZNF628	-2.56	0.011	0.21	1	0.32	0.92	-0.21	0.84	0.94
SH2D2A	-2.57	0.011	0.21	1.83	0.068	0.78	-1.41	0.16	0.43
GPR55	-2.55	0.011	0.21	0.55	0.58	0.97	-0.47	0.64	0.83
GRHPR	2.54	0.011	0.21	-0.66	0.51	0.96	-0.31	0.75	0.9
LOC100129055	-2.52	0.012	0.22	0.54	0.59	0.97	-0.33	0.74	0.89
NPY4R2	-2.51	0.012	0.22	0.91	0.36	0.93	-2	0.046	0.22
TCIRG1	2.53	0.012	0.22	-0.44	0.66	0.98	0.63	0.53	0.76
LOC107986383	-2.51	0.012	0.22	1.2	0.23	0.88	1.72	0.086	0.31
CZ1P-ASNS	-2.52	0.012	0.22	0.54	0.59	0.97	0.74	0.46	0.72
CDC42EP1	2.53	0.012	0.22	-0.51	0.61	0.97	-2.74	0.0064	0.072
PARK7	-2.52	0.012	0.22	-0.05	0.96	1	2.61	0.0093	0.089
SLC35A4	-2.52	0.012	0.22	-0.03	0.98	1	2.6	0.0097	0.092
GJB4	-2.53	0.012	0.22	1.44	0.15	0.85	2.27	0.023	0.15
TEDDM1	2.53	0.012	0.22	0.83	0.41	0.94	-2.33	0.021	0.14
SIRPD	-2.53	0.012	0.22	-0.2	0.84	0.99	1.66	0.097	0.33
CRYGB	2.54	0.012	0.22	1.19	0.23	0.89	-0.99	0.32	0.6
UBQLNL	2.52	0.012	0.22	-1.18	0.24	0.89	-1.78	0.075	0.29
DYRK1A	-2.51	0.012	0.22	-1.94	0.053	0.73	2.71	0.0068	0.075
USF3	2.52	0.012	0.22	-1.02	0.31	0.91	0.52	0.6	0.81
HSPA4L	-2.54	0.012	0.22	-2.11	0.035	0.69	2.13	0.034	0.18
NUP188	2.52	0.012	0.22	-3.09	0.0022	0.47	-0.95	0.34	0.62
TMEM97	-2.51	0.012	0.22	0.05	0.96	1	2.33	0.02	0.14
ZSCAN22	-2.53	0.012	0.22	-0.33	0.74	0.99	5.51	5.3e-08	3.8e-05
IFNA17	-2.51	0.012	0.22	0.23	0.82	0.99	1.25	0.21	0.49
LINC00671	-2.54	0.012	0.22	0.65	0.52	0.96	0.69	0.49	0.74
MAGEB3	2.51	0.012	0.22	-1.58	0.11	0.83	1.37	0.17	0.44
NKTR	2.52	0.012	0.22	1.39	0.16	0.86	-0.71	0.48	0.73
RTFDC1	-2.53	0.012	0.22	0.24	0.81	0.99	1.06	0.29	0.57
UBE2D4	2.52	0.012	0.22	1.66	0.097	0.81	-1.34	0.18	0.45
PLS1	-2.52	0.012	0.22	-1.21	0.23	0.88	1.67	0.094	0.32
DDX56	2.52	0.012	0.22	1.02	0.31	0.91	-2.61	0.0091	0.089
GPN2	-2.52	0.012	0.22	-1.06	0.29	0.91	0.99	0.32	0.6
XKR8	-2.52	0.012	0.22	0.29	0.77	0.99	1.55	0.12	0.37
LGR4	2.52	0.012	0.22	0.64	0.52	0.96	0.18	0.86	0.95
PRKDC	2.53	0.012	0.22	-0.85	0.39	0.94	-0.84	0.4	0.67
TMEM8A	2.53	0.012	0.22	0.33	0.74	0.99	-1.47	0.14	0.4
TLN1	2.51	0.012	0.22	0.15	0.88	1	-2.77	0.0057	0.069
TMPRSS2	2.52	0.012	0.22	0.96	0.34	0.92	-2.22	0.027	0.16
NUTM2D	2.53	0.012	0.22	0.12	0.9	1	-1.86	0.064	0.26
ZNF135	-2.53	0.012	0.22	-1.25	0.21	0.88	1.37	0.17	0.44
TRPM8	-2.51	0.012	0.22	1.64	0.1	0.81	0.24	0.81	0.92
ARMC7	-2.51	0.012	0.22	-0.49	0.62	0.97	2.03	0.043	0.21
STARD5	-2.51	0.012	0.22	1.45	0.15	0.85	-2.3	0.022	0.14
NSRP1	2.52	0.012	0.22	-0.39	0.69	0.98	-4.82	2e-06	0.00042
TOX2	2.51	0.012	0.22	1.33	0.18	0.87	0.05	0.96	0.98
CCNT1	2.53	0.012	0.22	0.05	0.96	1	-1.5	0.13	0.39
LOC102724428	-2.48	0.013	0.23	0.66	0.51	0.96	1.47	0.14	0.4
KLRA1P	2.48	0.013	0.23	1.71	0.088	0.8	-0.5	0.62	0.82
ERP29	-2.51	0.013	0.23	0.6	0.55	0.97	3.81	0.00016	0.008
ZFPM1	2.49	0.013	0.23	0.02	0.98	1	-0.44	0.66	0.85
GPHA2	-2.5	0.013	0.23	-0.81	0.42	0.94	1.56	0.12	0.37
EFNA5	-2.49	0.013	0.23	1.26	0.21	0.88	1.24	0.22	0.49
CT83	2.49	0.013	0.23	0.26	0.8	0.99	-0.6	0.55	0.78
ERH	-2.48	0.013	0.23	0.89	0.37	0.93	-0.52	0.6	0.81
GSTA5	2.48	0.013	0.23	0.56	0.58	0.97	-0.96	0.34	0.62
TNIK	-2.49	0.013	0.23	-0.11	0.91	1	0.85	0.39	0.66
SLC7A8	2.5	0.013	0.23	1.97	0.049	0.73	-1.11	0.27	0.55
PDSS1	-2.48	0.013	0.23	1.16	0.24	0.89	0.41	0.68	0.86
GPR22	-2.49	0.013	0.23	-1.31	0.19	0.87	0.34	0.73	0.89
GRID1	2.5	0.013	0.23	2.37	0.018	0.63	-0.19	0.85	0.94
SLC27A6	2.48	0.013	0.23	-1.16	0.25	0.89	1.31	0.19	0.46
SLC29A2	-2.5	0.013	0.23	1.21	0.23	0.88	2.44	0.015	0.12
ACACB	2.49	0.013	0.23	0.58	0.56	0.97	-0.02	0.98	0.99
DRAXIN	-2.51	0.013	0.23	-1.28	0.2	0.87	1.46	0.14	0.4
AQP12A	2.48	0.013	0.23	1.51	0.13	0.83	-1.15	0.25	0.53
MAST4	-2.48	0.013	0.23	-1.05	0.29	0.91	1.36	0.17	0.44
DNAJB9	-2.5	0.013	0.23	-0.65	0.52	0.96	3.08	0.0022	0.039
NEO1	2.5	0.013	0.23	-0.62	0.54	0.97	-2.11	0.035	0.19
GPX8	-2.5	0.013	0.23	0.63	0.53	0.96	0.98	0.33	0.61
NIN	2.48	0.013	0.23	-1.69	0.091	0.8	-1.04	0.3	0.58
MIOS	2.5	0.013	0.23	-1.92	0.055	0.75	-0.23	0.82	0.93
AUP1	2.5	0.013	0.23	0.89	0.38	0.93	-0.33	0.74	0.89
FBXW7	2.48	0.013	0.23	-1.35	0.18	0.86	-0.65	0.52	0.76
OTUB1	2.48	0.013	0.23	-0.78	0.44	0.94	-0.73	0.47	0.72
PRKAR2A	2.48	0.013	0.23	1.24	0.21	0.88	-1.44	0.15	0.41
AZU1	-2.49	0.013	0.23	-0.4	0.69	0.98	-0.01	0.99	1
MRPS22	2.51	0.013	0.23	0.9	0.37	0.93	0.32	0.75	0.89
PSMB9	2.5	0.013	0.23	0.2	0.84	0.99	-0.06	0.95	0.98
SHROOM3	-2.49	0.013	0.23	-0.74	0.46	0.95	-0.25	0.8	0.92
RAB5B	-2.48	0.013	0.23	0.49	0.63	0.98	-0.06	0.96	0.98
SELENOW	-2.51	0.013	0.23	-0.58	0.56	0.97	-1.51	0.13	0.39
WNK3	-2.49	0.013	0.23	-1.7	0.09	0.8	-1.33	0.18	0.45
STYX	2.49	0.013	0.23	0.37	0.71	0.98	-3.09	0.0021	0.038
MKRN3	2.49	0.013	0.23	0.71	0.48	0.95	-1.34	0.18	0.45
ZNF175	-2.49	0.013	0.23	0.52	0.6	0.97	-0.65	0.52	0.76
TCTN1	-2.5	0.013	0.23	-2.52	0.012	0.6	4.38	1.6e-05	0.0019
ST7	-2.48	0.013	0.23	-0.67	0.51	0.96	-0.28	0.78	0.91
SLC38A1	2.5	0.013	0.23	-1.35	0.18	0.86	-2.44	0.015	0.12
NOL4	-2.49	0.013	0.23	0.96	0.34	0.92	-0.16	0.87	0.95
UBA3	-2.5	0.013	0.23	0.79	0.43	0.94	1.9	0.058	0.25
ZNF670	-2.48	0.013	0.23	1.29	0.2	0.87	1.25	0.21	0.49
RIN1	-2.49	0.013	0.23	-0.63	0.53	0.96	1.58	0.11	0.36
TVP23C-CDRT4	2.47	0.014	0.23	1.52	0.13	0.83	-2.22	0.027	0.16
NBPF19&NBPF1	2.48	0.014	0.23	0.17	0.86	1	-1.42	0.16	0.42
LOC105376839	-2.47	0.014	0.23	2.89	0.004	0.53	-2.12	0.034	0.18
BRD8	-2.46	0.014	0.23	-0.4	0.69	0.98	0.92	0.36	0.64
PRSS21	-2.47	0.014	0.23	-1.22	0.22	0.88	0.13	0.9	0.96
TUBA3D	2.47	0.014	0.23	0.39	0.7	0.98	-0.96	0.34	0.62
CHRNB1	2.46	0.014	0.23	1.58	0.11	0.83	-1.74	0.083	0.3
OR2A14&OR2A2	2.48	0.014	0.23	-1.36	0.18	0.86	0.92	0.36	0.64
ZNF362	2.46	0.014	0.23	-0.19	0.85	0.99	-1.2	0.23	0.51
ASXL1	2.47	0.014	0.23	1.88	0.06	0.76	-2.11	0.035	0.19
ADCY4	2.47	0.014	0.23	0.97	0.33	0.92	-0.29	0.77	0.91
SCFD1	2.48	0.014	0.23	-0.51	0.61	0.97	-0.72	0.47	0.73
SASH1	2.47	0.014	0.23	-1.48	0.14	0.85	0.32	0.75	0.89
GEM	-2.46	0.014	0.24	0.99	0.32	0.92	-0.57	0.57	0.79
CIDEB	-2.48	0.014	0.23	0.18	0.86	0.99	2.13	0.034	0.18
GPR37	2.45	0.014	0.24	0.2	0.84	0.99	-2.15	0.032	0.18
HTN1	-2.49	0.014	0.23	1.28	0.2	0.87	0.4	0.69	0.86
AQP8	2.47	0.014	0.23	1.05	0.3	0.91	-0.69	0.49	0.74
STT3A	-2.47	0.014	0.23	-1.38	0.17	0.86	2.13	0.034	0.18
JUP	2.47	0.014	0.23	-0.17	0.87	1	-1.75	0.08	0.3
KCNA2	2.46	0.014	0.23	0.67	0.5	0.96	-3.6	0.00035	0.014
HEATR4	-2.47	0.014	0.23	-0.67	0.5	0.96	1.89	0.06	0.25
CDNF	2.47	0.014	0.23	-1.2	0.23	0.88	-0.83	0.41	0.68
NUSAP1	-2.47	0.014	0.23	-0.47	0.64	0.98	2	0.046	0.22
PFKFB1	2.45	0.014	0.24	-0.48	0.63	0.98	-0.28	0.78	0.91
PCSK4	-2.48	0.014	0.23	-2.38	0.018	0.63	1.54	0.12	0.37
LRIF1	2.46	0.014	0.23	-0.84	0.4	0.94	-2.45	0.015	0.12
C8orf44	-2.46	0.014	0.23	0.54	0.59	0.97	0.23	0.82	0.93
LGMN	2.47	0.014	0.23	-0.76	0.45	0.94	0.32	0.75	0.89
RAB27A	-2.46	0.014	0.23	0.06	0.95	1	-3.25	0.0012	0.028
RAC1	2.46	0.014	0.23	0.17	0.86	1	-0.49	0.62	0.82
RBL1	2.48	0.014	0.23	1.4	0.16	0.86	-0.14	0.89	0.96
RPLP2	-2.47	0.014	0.23	0.82	0.41	0.94	2.37	0.019	0.13
NEUROD6	2.46	0.014	0.23	1	0.32	0.91	0.1	0.92	0.97
MFSD14A	2.47	0.014	0.23	-0.51	0.61	0.97	-3.15	0.0017	0.035
SRP68	2.46	0.014	0.23	-0.18	0.86	0.99	-4.03	6.5e-05	0.0045
TADA2A	-2.47	0.014	0.23	-0.85	0.4	0.94	1.44	0.15	0.41
TAP2	2.46	0.014	0.23	-0.33	0.74	0.99	-2.27	0.023	0.15
TNR	-2.46	0.014	0.24	1.58	0.11	0.83	3.07	0.0022	0.04
SLC30A1	2.46	0.014	0.23	0.31	0.76	0.99	-1.67	0.095	0.32
MYO19	2.48	0.014	0.23	0.98	0.33	0.92	-1.46	0.15	0.41
LBH	-2.46	0.014	0.23	0.52	0.61	0.97	-1.1	0.27	0.55
HORMAD1	2.47	0.014	0.23	-0.44	0.66	0.98	-0.19	0.85	0.94
CD101	-2.47	0.014	0.23	0.54	0.59	0.97	-1.89	0.059	0.25
SERHL	2.46	0.014	0.24	0.72	0.47	0.95	-3.3	0.001	0.026
ENTPD5	2.46	0.014	0.23	0.04	0.97	1	-0.81	0.42	0.68
SERTAD2	-2.47	0.014	0.23	-0.02	0.99	1	0.85	0.4	0.67
CDC6	-2.46	0.014	0.24	0.37	0.71	0.98	-1.29	0.2	0.47
OXSR1	2.47	0.014	0.23	-1.73	0.084	0.8	-1.94	0.053	0.23
ISY1-RAB43	-2.44	0.015	0.24	0.01	0.99	1	0.77	0.44	0.7
HUWE1	2.45	0.015	0.24	0.23	0.82	0.99	2.61	0.0093	0.089
LOC100996517&LOC100996716&LOC102724364	2.44	0.015	0.24	-0.61	0.55	0.97	-2.04	0.042	0.21
PGRMC2	2.44	0.015	0.24	-0.63	0.53	0.96	0.45	0.65	0.84
LOC105379426	2.43	0.015	0.24	1.52	0.13	0.83	-2.23	0.026	0.16
ZPLD1	-2.44	0.015	0.24	1.58	0.11	0.83	1.07	0.28	0.57
STARD4	2.43	0.015	0.24	0.03	0.98	1	-1.5	0.14	0.39
RAET1E	-2.44	0.015	0.24	1.53	0.13	0.83	0.6	0.55	0.78
DIRAS1	-2.45	0.015	0.24	-0.01	0.99	1	2.35	0.019	0.13
AP2A1	-2.44	0.015	0.24	-0.19	0.85	0.99	-0.8	0.42	0.69
PAOX	-2.45	0.015	0.24	-0.12	0.91	1	2.7	0.0071	0.077
EMP3	2.43	0.015	0.24	0.2	0.84	0.99	-2.14	0.033	0.18
ETFDH	2.44	0.015	0.24	-0.4	0.69	0.98	-1.33	0.18	0.45
ZC3H7B	-2.44	0.015	0.24	-1.01	0.31	0.91	1.78	0.077	0.29
FUS	2.44	0.015	0.24	-0.18	0.86	0.99	-0.54	0.59	0.8
GAPDH	-2.44	0.015	0.24	1.56	0.12	0.83	-0.6	0.55	0.78
ARFGAP3	-2.44	0.015	0.24	-0.28	0.78	0.99	0.26	0.79	0.92
MRPL46	2.44	0.015	0.24	0	1	1	-1.46	0.15	0.41
FAM156A&FAM156B	2.45	0.015	0.24	1.98	0.049	0.73	-3.82	0.00017	0.0084
GYS1	2.45	0.015	0.24	-0.98	0.33	0.92	-0.85	0.4	0.67
HIST1H2BB	2.45	0.015	0.24	0.5	0.62	0.97	-2.58	0.01	0.094
HOXA7	-2.44	0.015	0.24	0.59	0.56	0.97	3.55	0.00042	0.015
HPX	-2.45	0.015	0.24	-0.51	0.61	0.97	2.54	0.011	0.099
FOXN2	2.44	0.015	0.24	0.79	0.43	0.94	0.47	0.64	0.83
CCDC144NL	-2.45	0.015	0.24	0.62	0.54	0.97	2.52	0.012	0.1
IGFBP7	-2.45	0.015	0.24	0.26	0.79	0.99	1.35	0.18	0.45
ATP9B	2.43	0.015	0.24	0.96	0.34	0.92	-0.57	0.57	0.79
KRT8	-2.45	0.015	0.24	-1.11	0.27	0.9	3	0.0029	0.047
SPATA41	-2.43	0.015	0.24	-0.69	0.49	0.96	1.84	0.066	0.27
UBE2NL	-2.45	0.015	0.24	1.12	0.26	0.9	-1.38	0.17	0.44
MLN	-2.43	0.015	0.24	0.9	0.37	0.93	-1.27	0.2	0.48
NFATC4	2.43	0.015	0.24	0.63	0.53	0.96	0.27	0.78	0.91
PON2	2.43	0.015	0.24	0.02	0.98	1	-2.13	0.033	0.18
PAQR5	-2.43	0.015	0.24	1.26	0.21	0.88	0.58	0.56	0.79
TCP11L1	2.45	0.015	0.24	0.45	0.65	0.98	-0.57	0.57	0.79
ATP8B2	2.45	0.015	0.24	-0.56	0.57	0.97	0.26	0.79	0.92
MPP4	2.45	0.015	0.24	-0.4	0.69	0.98	1.42	0.16	0.42
RPN2	2.45	0.015	0.24	0.29	0.77	0.99	-1.07	0.29	0.57
HIST2H3D	-2.43	0.015	0.24	0.25	0.81	0.99	1.02	0.31	0.59
GTF2IRD1P1	-2.43	0.015	0.24	-0.07	0.95	1	0.2	0.84	0.94
XBP1	-2.43	0.015	0.24	-0.15	0.88	1	-0.9	0.37	0.64
ADIPOR2	-2.43	0.015	0.24	-0.03	0.98	1	1.14	0.25	0.53
ZNF430	2.44	0.015	0.24	-0.82	0.41	0.94	-2.39	0.017	0.13
SPSB2	-2.45	0.015	0.24	-1.4	0.16	0.86	1.04	0.3	0.58
ARHGEF39	2.45	0.015	0.24	-0.32	0.75	0.99	-1.59	0.11	0.35
NUMB	2.43	0.015	0.24	-0.09	0.93	1	-0.68	0.5	0.74
AP4M1	2.43	0.015	0.24	0.54	0.59	0.97	-2.11	0.035	0.19
TNFSF13B	2.41	0.016	0.25	1	0.32	0.91	-3.45	0.00062	0.02
PNMA2	-2.41	0.016	0.25	-0.41	0.68	0.98	2.34	0.019	0.14
APLNR	-2.41	0.016	0.25	0.9	0.37	0.93	1.45	0.15	0.41
ERCC5	2.41	0.016	0.25	0.25	0.8	0.99	-1.64	0.1	0.34
NSUN6	-2.41	0.016	0.25	0.96	0.34	0.92	1.77	0.077	0.29
GGT3P	-2.42	0.016	0.25	0.86	0.39	0.94	0.77	0.44	0.7
TSPAN13	-2.42	0.016	0.25	-0.4	0.69	0.98	2.56	0.011	0.099
LCN12	-2.41	0.016	0.25	0.55	0.58	0.97	-1.88	0.061	0.25
OR4D10	-2.42	0.016	0.25	-0.15	0.88	1	1.67	0.095	0.33
MATK	-2.42	0.016	0.25	0.89	0.37	0.93	1.02	0.31	0.59
JKAMP	2.41	0.016	0.25	-0.05	0.96	1	-0.84	0.4	0.67
CAB39	-2.42	0.016	0.25	-1.56	0.12	0.83	0.71	0.48	0.73
PLRG1	-2.41	0.016	0.25	0.57	0.57	0.97	0.89	0.38	0.65
UGT1A7	-2.41	0.016	0.25	0.18	0.86	0.99	-0.28	0.78	0.91
MRPS18A	-2.42	0.016	0.25	0.42	0.67	0.98	3.82	0.00016	0.0083
ABHD10	2.42	0.016	0.25	-0.4	0.69	0.98	-1.77	0.078	0.29
BATF3	2.41	0.016	0.25	-0.29	0.77	0.99	0.03	0.97	0.99
RCN3	2.42	0.016	0.25	-1.17	0.24	0.89	0.44	0.66	0.85
ZNF106	2.41	0.016	0.25	1.46	0.14	0.85	-3.3	0.001	0.026
VPS33A	-2.42	0.016	0.25	0.71	0.48	0.95	-0.51	0.61	0.81
XRCC4	-2.42	0.016	0.25	-2.65	0.0083	0.58	3.95	8.7e-05	0.0053
SNRNP25	-2.42	0.016	0.25	1.53	0.13	0.83	-0.29	0.77	0.9
CAMKMT	2.43	0.016	0.24	-0.63	0.53	0.96	-2.32	0.021	0.14
CDK5RAP3	-2.42	0.016	0.25	1.38	0.17	0.86	0.44	0.66	0.84
KCNIP4	-2.42	0.016	0.25	0.75	0.45	0.95	0.7	0.48	0.73
TTC29	2.42	0.016	0.25	-0.36	0.72	0.98	-0.31	0.75	0.9
SIRPB1	2.4	0.017	0.25	-0.81	0.42	0.94	1.88	0.06	0.25
LOC105371242	-2.4	0.017	0.25	-1.17	0.24	0.89	1.77	0.077	0.29
CGB3&CGB1&CGB2&CGB5&CGB7&CGB8	2.39	0.017	0.26	0.7	0.49	0.95	-2.68	0.0076	0.08
LYPLA2	2.39	0.017	0.26	-0.78	0.44	0.94	-3.47	0.00056	0.019
BUD23	2.39	0.017	0.26	-0.3	0.76	0.99	-0.5	0.61	0.82
ACVR1C	-2.39	0.017	0.26	-1.28	0.2	0.87	2.23	0.026	0.16
ADORA2A	-2.39	0.017	0.26	-1.57	0.12	0.83	3.06	0.0023	0.041
PAGE3	2.41	0.017	0.25	0.73	0.47	0.95	-2.1	0.036	0.19
C11orf40	-2.4	0.017	0.26	-0.56	0.58	0.97	3.24	0.0013	0.03
CCDC42	-2.41	0.017	0.25	-0.38	0.71	0.98	1.06	0.29	0.57
CYP2C19	-2.4	0.017	0.25	1.38	0.17	0.86	2.33	0.02	0.14
C16orf82	-2.4	0.017	0.26	-0.51	0.61	0.97	1.69	0.091	0.32
TDRD5	2.38	0.017	0.26	0.38	0.7	0.98	1.06	0.29	0.57
ENO3	-2.4	0.017	0.25	0.74	0.46	0.95	1.27	0.2	0.48
RHBDD3	2.39	0.017	0.26	0.42	0.67	0.98	-1.26	0.21	0.48
GPC1	2.4	0.017	0.26	0.22	0.83	0.99	-1.55	0.12	0.37
TRIM49B	2.4	0.017	0.25	2.64	0.0085	0.58	-3.57	0.00038	0.014
NRG1	2.39	0.017	0.26	0.43	0.67	0.98	-1.55	0.12	0.37
IRF1	2.38	0.017	0.26	-0.69	0.49	0.95	0.35	0.73	0.88
ZNF829	-2.39	0.017	0.26	-0.11	0.91	1	1.98	0.049	0.23
LINC00336	-2.41	0.017	0.25	1.03	0.31	0.91	1.13	0.26	0.54
MMP15	-2.39	0.017	0.26	0.51	0.61	0.97	-1.24	0.22	0.49
MT1E	-2.4	0.017	0.26	0.34	0.74	0.99	3.78	0.00019	0.0093
NDUFA13	-2.4	0.017	0.25	-0.4	0.69	0.98	2.8	0.0053	0.065
SELENON	-2.39	0.017	0.26	-0.84	0.4	0.94	2.76	0.0059	0.07
ISY1	2.4	0.017	0.25	1.06	0.29	0.91	-0.56	0.57	0.79
RAG2	2.38	0.017	0.26	-0.62	0.54	0.97	-2.72	0.0067	0.074
CCL21	-2.39	0.017	0.26	0.81	0.42	0.94	2.63	0.0087	0.087
ZNF335	-2.41	0.017	0.25	0.76	0.45	0.95	2.48	0.014	0.11
SECTM1	-2.4	0.017	0.25	0.52	0.6	0.97	-3.31	0.001	0.025
BMP1	-2.39	0.017	0.26	-0.15	0.88	1	0.3	0.77	0.9
BTF3P11	-2.39	0.017	0.26	-0.58	0.56	0.97	1.41	0.16	0.42
KLF10	2.4	0.017	0.25	0.02	0.99	1	0.77	0.44	0.7
TCL1A	2.38	0.017	0.26	0.47	0.64	0.98	-1.2	0.23	0.51
HIST1H3G	2.4	0.017	0.25	-0.15	0.88	1	-0.58	0.56	0.79
TMEM107	-2.41	0.017	0.25	-0.53	0.6	0.97	-0.11	0.91	0.97
PLA2G12B	2.39	0.017	0.26	2.07	0.039	0.71	-0.2	0.84	0.94
CRACR2A	2.4	0.017	0.25	-0.18	0.86	0.99	-0.43	0.67	0.85
RELT	-2.4	0.017	0.25	0.19	0.85	0.99	-0.44	0.66	0.84
LRRCC1	-2.39	0.017	0.26	-0.63	0.53	0.96	3.21	0.0014	0.031
ALDH4A1	2.39	0.017	0.26	-0.78	0.44	0.94	-0.67	0.5	0.75
PSTPIP2	-2.38	0.017	0.26	0.55	0.58	0.97	0.01	0.99	1
SART1	-2.39	0.017	0.26	-1.53	0.13	0.83	3.61	0.00034	0.013
PICK1	2.4	0.017	0.25	0.1	0.92	1	-1.14	0.26	0.54
CD300LD	2.37	0.018	0.26	1.12	0.26	0.9	1.31	0.19	0.46
GALNT6	2.37	0.018	0.26	-0.93	0.35	0.93	-0.87	0.39	0.66
DDIT4L	2.38	0.018	0.26	1.8	0.073	0.79	-0.54	0.59	0.8
KLHDC1	-2.39	0.018	0.26	0.63	0.53	0.96	-0.8	0.42	0.69
ZNF684	-2.37	0.018	0.26	-1.13	0.26	0.89	1.18	0.24	0.52
COL13A1	2.37	0.018	0.26	0.21	0.84	0.99	0.3	0.77	0.9
ENPP6	-2.37	0.018	0.26	0.06	0.96	1	0.69	0.49	0.74
ADRA1B	2.38	0.018	0.26	-0.4	0.69	0.98	-2.43	0.015	0.12
CYP2C18	2.37	0.018	0.26	-0.26	0.8	0.99	0.66	0.51	0.75
ZNF48	-2.38	0.018	0.26	-0.58	0.56	0.97	0.48	0.63	0.83
EP300	2.37	0.018	0.26	-1.25	0.21	0.88	-0.87	0.39	0.66
SP8	2.37	0.018	0.26	2.08	0.038	0.71	-2.26	0.024	0.15
RAP1GAP2	-2.38	0.018	0.26	0.97	0.33	0.92	1.52	0.13	0.38
SDF2L1	2.36	0.018	0.26	0.01	0.99	1	-1.56	0.12	0.37
TNFAIP8	-2.37	0.018	0.26	1.2	0.23	0.88	1.55	0.12	0.37
KLK5	-2.38	0.018	0.26	-1.48	0.14	0.84	-0.22	0.82	0.93
GEMIN5	-2.37	0.018	0.26	0.32	0.75	0.99	0.34	0.73	0.89
C8orf31	2.38	0.018	0.26	1.65	0.1	0.81	1.14	0.25	0.53
EFEMP2	-2.38	0.018	0.26	0.4	0.69	0.98	0.26	0.79	0.92
TBX10	-2.38	0.018	0.26	0.45	0.65	0.98	3.55	0.00042	0.015
LMO2	-2.37	0.018	0.26	-0.44	0.66	0.98	-1.88	0.06	0.25
NDUFA8	-2.37	0.018	0.26	-0.99	0.32	0.92	1.82	0.07	0.27
SLC11A2	2.38	0.018	0.26	-0.11	0.91	1	-1.09	0.28	0.56
NTRK3	-2.38	0.018	0.26	2.52	0.012	0.6	-2.49	0.013	0.11
HSPA14	2.37	0.018	0.26	0.76	0.45	0.94	-1.29	0.2	0.47
SAMD9	2.39	0.018	0.26	1.21	0.23	0.88	-2.06	0.041	0.2
PHF10	2.38	0.018	0.26	1.13	0.26	0.89	-2.56	0.011	0.096
SYBU	2.38	0.018	0.26	1.56	0.12	0.83	-3.14	0.0019	0.036
GNG12	-2.38	0.018	0.26	-0.62	0.53	0.97	-1.13	0.26	0.54
CABP5	2.38	0.018	0.26	1.03	0.3	0.91	-1.28	0.2	0.48
C8orf4	-2.37	0.018	0.26	-0.03	0.98	1	2.25	0.025	0.15
ZNF304	-2.37	0.018	0.26	0.24	0.81	0.99	0.32	0.75	0.89
PTK2	2.38	0.018	0.26	0.46	0.64	0.98	0.62	0.54	0.77
PURA	2.37	0.018	0.26	1.59	0.11	0.83	-1.21	0.23	0.51
RGL2	2.37	0.018	0.26	0.15	0.88	1	0.05	0.96	0.98
RAD51	-2.38	0.018	0.26	-2.3	0.022	0.63	2.54	0.011	0.099
ANKEF1	2.36	0.018	0.26	1.51	0.13	0.83	-1.64	0.1	0.34
TRIM49C	-2.38	0.018	0.26	-1.04	0.3	0.91	2.03	0.043	0.21
TSPAN6	2.38	0.018	0.26	0.25	0.81	0.99	0.72	0.47	0.72
ZNF16	2.37	0.018	0.26	-1.34	0.18	0.87	3.42	0.00067	0.02
CRELD2	-2.37	0.018	0.26	-0.56	0.58	0.97	0.83	0.41	0.68
RIC3	2.37	0.018	0.26	0.79	0.43	0.94	-2.45	0.015	0.12
NR0B2	-2.37	0.018	0.26	1.07	0.28	0.9	-0.44	0.66	0.84
RHPN2	2.37	0.018	0.26	0.27	0.79	0.99	-1.68	0.094	0.32
SEC22C	-2.37	0.018	0.26	0.12	0.9	1	1.72	0.085	0.31
NUP210L	-2.38	0.018	0.26	-2.42	0.016	0.63	2.44	0.015	0.12
SYNGR1	-2.39	0.018	0.26	0.97	0.33	0.92	0.87	0.39	0.66
DLG5	2.38	0.018	0.26	-0.3	0.76	0.99	1.41	0.16	0.42
CACNG3	-2.35	0.019	0.27	1.64	0.1	0.81	0.67	0.51	0.75
TRIM16	2.35	0.019	0.26	-2.01	0.045	0.73	-1.33	0.18	0.46
RPUSD1	2.35	0.019	0.27	-0.45	0.65	0.98	0.54	0.59	0.8
APOA5	-2.35	0.019	0.27	-0.2	0.84	0.99	3.31	0.001	0.026
HAPLN1	-2.35	0.019	0.26	-0.46	0.65	0.98	-1.7	0.09	0.32
NEK10	-2.34	0.019	0.27	-1.38	0.17	0.86	1.91	0.057	0.24
COCH	2.35	0.019	0.26	1.51	0.13	0.83	-1.32	0.19	0.46
EML1	2.35	0.019	0.27	-0.91	0.36	0.93	-1.74	0.082	0.3
ANP32D	-2.36	0.019	0.26	0	1	1	1.48	0.14	0.4
BACE2	2.35	0.019	0.27	-1.75	0.081	0.8	-1.12	0.26	0.55
FAM155B	-2.36	0.019	0.26	-0.21	0.83	0.99	3.52	0.0005	0.017
RABGEF1	2.34	0.019	0.27	0.35	0.73	0.98	0.35	0.72	0.88
GSTK1	-2.37	0.019	0.26	0.99	0.32	0.92	-2.32	0.021	0.14
ZNF710	-2.36	0.019	0.26	-0.16	0.87	1	3.15	0.0018	0.035
KCNJ2	2.36	0.019	0.26	1.29	0.2	0.87	-0.94	0.35	0.63
PRAMEF11	2.38	0.019	0.26	-1.34	0.18	0.87	-0.77	0.44	0.7
MT2A	-2.35	0.019	0.26	0.06	0.96	1	1.49	0.14	0.39
NTM	-2.36	0.019	0.26	-1.35	0.18	0.86	-0.48	0.63	0.83
PMCHL1	-2.37	0.019	0.26	-0.38	0.7	0.98	2.75	0.0063	0.072
CLIC6	-2.35	0.019	0.26	-2.62	0.0091	0.58	-1.15	0.25	0.53
LOC554223	2.36	0.019	0.26	1.63	0.1	0.82	1.61	0.11	0.35
NSFL1C	-2.36	0.019	0.27	0.42	0.68	0.98	1.39	0.16	0.43
VARS2	-2.37	0.019	0.26	0.38	0.7	0.98	2.56	0.011	0.099
SLAMF7	2.36	0.019	0.26	0.44	0.66	0.98	-3.02	0.0026	0.045
CCL7	2.34	0.019	0.27	-1.27	0.2	0.87	-0.53	0.6	0.81
BCAN	-2.36	0.019	0.26	-0.68	0.5	0.96	0.21	0.83	0.93
TINAGL1	2.35	0.019	0.27	-1.96	0.051	0.73	-1.97	0.05	0.23
CARD9	2.36	0.019	0.26	1.82	0.07	0.78	-3.27	0.0011	0.027
SMYD3	2.35	0.019	0.27	-2.47	0.014	0.61	-1.08	0.28	0.56
VAMP2	-2.37	0.019	0.26	0.53	0.6	0.97	0.91	0.36	0.64
TGFBI	2.36	0.019	0.26	-1.64	0.1	0.81	0.32	0.75	0.89
TNNI3	-2.36	0.019	0.26	-0.23	0.82	0.99	-0.44	0.66	0.84
TPR	-2.36	0.019	0.26	0.52	0.6	0.97	0.1	0.92	0.97
WDR78	-2.35	0.019	0.27	0.26	0.8	0.99	1.49	0.14	0.39
ST6GALNAC5	2.36	0.019	0.26	0.22	0.83	0.99	1.43	0.15	0.42
NSMAF	2.35	0.019	0.26	1.21	0.23	0.88	0.53	0.6	0.81
IRS4	2.36	0.019	0.26	0.62	0.54	0.97	-0.77	0.44	0.7
CNTNAP4	2.37	0.019	0.26	-1.63	0.1	0.82	0.03	0.98	0.99
BLOC1S5-TXNDC5	2.33	0.02	0.27	-0.2	0.85	0.99	-1.36	0.18	0.44
CEBPZ	2.33	0.02	0.27	1.13	0.26	0.89	1.6	0.11	0.35
VTI1B	-2.34	0.02	0.27	0.26	0.8	0.99	-0.51	0.61	0.81
SDS	2.32	0.02	0.27	-0.9	0.37	0.93	-1.38	0.17	0.44
SMYD4	2.33	0.02	0.27	-1.13	0.26	0.89	-1.19	0.23	0.52
RAB42	2.32	0.02	0.27	-0.21	0.83	0.99	0.05	0.96	0.98
CNR2	-2.33	0.02	0.27	-0.97	0.33	0.92	1.21	0.23	0.5
LIPJ	2.33	0.02	0.27	0.61	0.54	0.97	-1.07	0.29	0.57
CACUL1	-2.33	0.02	0.27	-1.08	0.28	0.9	1.04	0.3	0.58
DAB1	-2.33	0.02	0.27	-0.33	0.74	0.99	2.22	0.027	0.16
CLEC12A	2.34	0.02	0.27	-0.14	0.89	1	-1.39	0.17	0.43
DHCR24	-2.34	0.02	0.27	0.98	0.33	0.92	-0.22	0.83	0.93
FGF4	2.33	0.02	0.27	1.7	0.09	0.8	-3.2	0.0014	0.031
ZNF510	-2.33	0.02	0.27	1.04	0.3	0.91	-0.98	0.33	0.6
FPR3	2.34	0.02	0.27	0.73	0.46	0.95	1.47	0.14	0.4
GLO1	-2.33	0.02	0.27	1.38	0.17	0.86	1.74	0.083	0.3
AQP11	-2.34	0.02	0.27	2.48	0.013	0.6	1.33	0.18	0.46
KCTD1	-2.33	0.02	0.27	1.4	0.16	0.86	-1.04	0.3	0.58
TCAIM	2.35	0.02	0.27	0.31	0.75	0.99	-1.06	0.29	0.57
SERTAD3	-2.33	0.02	0.27	-0.82	0.41	0.94	2.21	0.027	0.16
MS4A10	2.34	0.02	0.27	0.53	0.6	0.97	0.38	0.71	0.87
ARRB1	-2.33	0.02	0.27	-1.82	0.07	0.78	2.6	0.0095	0.09
MPV17	-2.33	0.02	0.27	0.14	0.89	1	-0.21	0.83	0.93
PLEKHM1P1	-2.33	0.02	0.27	-0.8	0.42	0.94	0.89	0.37	0.65
MUSK	2.33	0.02	0.27	-0.61	0.54	0.97	-2.24	0.025	0.16
DDX41	-2.33	0.02	0.27	-0.77	0.44	0.94	-0.49	0.62	0.82
ANAPC11	-2.32	0.02	0.27	0.93	0.35	0.93	-0.32	0.75	0.89
SLC25A39	-2.33	0.02	0.27	-0.59	0.56	0.97	3.25	0.0013	0.03
TAPBPL	2.33	0.02	0.27	1.8	0.072	0.79	-1.6	0.11	0.35
C8orf33	2.34	0.02	0.27	1.69	0.092	0.81	-0.63	0.53	0.76
FUNDC2	-2.34	0.02	0.27	-2.08	0.039	0.71	1.01	0.31	0.59
TAF13	2.34	0.02	0.27	0.97	0.33	0.92	-0.72	0.47	0.72
NR2C2	2.34	0.02	0.27	2.75	0.0061	0.57	-1.23	0.22	0.5
UBE2D1	-2.33	0.02	0.27	1.08	0.28	0.9	1.12	0.26	0.54
PDCD1LG2	2.34	0.02	0.27	0.56	0.58	0.97	-1.24	0.22	0.49
RASSF4	-2.34	0.02	0.27	0.77	0.44	0.94	-0.49	0.62	0.82
SPNS1	2.33	0.02	0.27	-0.73	0.46	0.95	0.52	0.61	0.81
PTTG1	2.34	0.02	0.27	1.8	0.072	0.79	-0.74	0.46	0.71
CLEC6A	-2.34	0.02	0.27	0.72	0.47	0.95	0.31	0.76	0.9
ENTPD4	-2.34	0.02	0.27	0.92	0.36	0.93	-1.17	0.24	0.52
NFE2L3	2.33	0.02	0.27	-0.61	0.54	0.97	1.07	0.28	0.57
CTDSP2	2.32	0.021	0.27	0.29	0.77	0.99	-2.78	0.0056	0.068
LOC102723917&RPL23AP7&RPL23AP82&RPL23AP87	-2.31	0.021	0.28	-0.51	0.61	0.97	0.45	0.65	0.84
BTN3A2	2.31	0.021	0.28	-0.35	0.73	0.98	-0.31	0.76	0.9
CHEK2	-2.31	0.021	0.28	0.86	0.39	0.93	-7.25	1.3e-12	2.7e-09
SLC46A1	2.32	0.021	0.27	-1.23	0.22	0.88	-1.82	0.07	0.27
CPN2	2.32	0.021	0.28	-0.77	0.44	0.94	-0.81	0.42	0.68
PTCHD1	2.32	0.021	0.28	-0.57	0.57	0.97	-1.03	0.3	0.59
PROCA1	-2.31	0.021	0.28	-0.26	0.8	0.99	0.79	0.43	0.69
TRIM16L	-2.32	0.021	0.27	1.13	0.26	0.89	1.73	0.085	0.31
SIK1	2.32	0.021	0.27	0.8	0.42	0.94	-1.44	0.15	0.41
FAM84A	2.32	0.021	0.28	1.12	0.26	0.89	-2.41	0.016	0.12
CYP3A4	-2.3	0.021	0.28	0.5	0.62	0.97	-2	0.046	0.22
EME2	-2.31	0.021	0.28	0.49	0.62	0.97	1.67	0.097	0.33
EIF4G1	2.31	0.021	0.28	0.01	1	1	1.39	0.16	0.43
MSRB2	-2.31	0.021	0.28	0.69	0.49	0.96	-0.02	0.98	0.99
MYCBP2	-2.32	0.021	0.27	-1.95	0.051	0.73	0.37	0.71	0.87
MAPK8IP3	-2.33	0.021	0.27	0.43	0.67	0.98	1.38	0.17	0.44
CAPN7	-2.31	0.021	0.28	0.07	0.95	1	-1.69	0.091	0.32
GABRP	-2.31	0.021	0.28	-0.24	0.81	0.99	2.15	0.032	0.18
IFNL1	-2.32	0.021	0.27	0.18	0.86	0.99	-0.48	0.63	0.83
KTN1	-2.31	0.021	0.28	-1.74	0.082	0.8	-1.03	0.3	0.59
GPR152	-2.31	0.021	0.28	-1.18	0.24	0.89	0.57	0.57	0.79
MYO7B	-2.32	0.021	0.28	-0.98	0.33	0.92	0.42	0.67	0.85
GMNN	2.32	0.021	0.27	1.06	0.29	0.91	-1.67	0.095	0.32
NOP16	-2.32	0.021	0.27	-0.34	0.73	0.99	2.38	0.018	0.13
ZRANB1	2.32	0.021	0.28	-0.79	0.43	0.94	0.66	0.51	0.75
MRPS10	2.32	0.021	0.27	-0.24	0.81	0.99	-0.61	0.54	0.77
CTNNBL1	-2.32	0.021	0.27	-1.23	0.22	0.88	2.44	0.015	0.12
PGM5P2	-2.32	0.021	0.27	0.08	0.94	1	2.17	0.03	0.17
RPL39	2.32	0.021	0.28	-1.03	0.3	0.91	1.13	0.26	0.54
MRPS12	-2.31	0.021	0.28	1.16	0.25	0.89	1.35	0.18	0.45
TCEA1	2.31	0.021	0.28	1.02	0.31	0.91	1.32	0.19	0.46
VPS51	-2.33	0.021	0.27	-0.63	0.53	0.96	2.64	0.0088	0.087
EFCAB1	-2.31	0.021	0.28	-0.83	0.41	0.94	1.05	0.3	0.58
GEMIN7	2.32	0.021	0.28	0.54	0.59	0.97	-0.63	0.53	0.76
ZRSR2	-2.31	0.021	0.28	0.02	0.98	1	1.16	0.25	0.53
DCUN1D5	-2.32	0.021	0.27	0.47	0.64	0.98	-1.02	0.31	0.59
SNX3	-2.31	0.021	0.28	1.11	0.27	0.9	0.54	0.59	0.8
CCND3	2.32	0.021	0.27	0.07	0.94	1	-2.72	0.0068	0.075
MIDN	-2.31	0.021	0.28	-0.13	0.9	1	0.82	0.41	0.68
ZSWIM1	2.33	0.021	0.27	0.03	0.97	1	-2.75	0.0063	0.072
KDELR3	2.3	0.022	0.28	-1.17	0.24	0.89	1.93	0.054	0.24
ADCY7	-2.29	0.022	0.28	-0.03	0.98	1	3.99	7.5e-05	0.0049
PKD1L2	-2.29	0.022	0.28	-0.12	0.9	1	0.09	0.93	0.97
FMO9P	2.3	0.022	0.28	-1.16	0.25	0.89	-1.94	0.052	0.23
RFFL	2.29	0.022	0.28	2.67	0.0077	0.57	-0.63	0.53	0.76
RXFP2	2.29	0.022	0.28	1.69	0.091	0.8	-3.93	9.6e-05	0.0057
WDR63	2.3	0.022	0.28	0.12	0.91	1	0.15	0.88	0.95
DCAF8L1	-2.29	0.022	0.28	0.18	0.86	0.99	1.47	0.14	0.4
SPATA8	2.29	0.022	0.28	0.48	0.63	0.98	0.51	0.61	0.81
AK8	-2.3	0.022	0.28	-1.64	0.1	0.81	0.13	0.9	0.96
ZNF780B	2.3	0.022	0.28	0.12	0.91	1	-0.44	0.66	0.84
ADGRF3	2.3	0.022	0.28	0.12	0.9	1	-0.42	0.68	0.85
TWISTNB	2.31	0.022	0.28	1.31	0.19	0.87	2.05	0.041	0.21
FH	2.3	0.022	0.28	0.32	0.75	0.99	-3.47	0.00056	0.019
ATF6	2.29	0.022	0.28	2.33	0.02	0.63	-2.21	0.028	0.16
AIPL1	-2.3	0.022	0.28	-2.26	0.024	0.66	2.22	0.027	0.16
CATSPERE	-2.29	0.022	0.28	-0.03	0.98	1	1.29	0.2	0.47
SH3KBP1	2.3	0.022	0.28	0.72	0.47	0.95	-1.4	0.16	0.43
ITGB2	2.29	0.022	0.28	1.81	0.07	0.78	-2.95	0.0033	0.051
PCSK5	-2.3	0.022	0.28	0.68	0.49	0.96	-1.41	0.16	0.43
ZFAND6	-2.3	0.022	0.28	-1.21	0.23	0.88	3.08	0.0022	0.039
BRIX1	2.29	0.022	0.28	1.15	0.25	0.89	0.72	0.47	0.72
KCMF1	2.29	0.022	0.28	0.09	0.93	1	-2.63	0.0087	0.087
PSMG2	2.3	0.022	0.28	1.3	0.2	0.87	-1.17	0.24	0.52
WDR18	2.3	0.022	0.28	2.21	0.028	0.66	-1.41	0.16	0.43
CGN	2.3	0.022	0.28	-0.82	0.41	0.94	-1.36	0.17	0.44
PTPRM	2.3	0.022	0.28	0.31	0.76	0.99	-2.4	0.017	0.12
KLHL12	2.31	0.022	0.28	0.48	0.63	0.98	-0.95	0.34	0.62
BST2	-2.3	0.022	0.28	-0.98	0.33	0.92	0.31	0.76	0.9
TIE1	-2.29	0.022	0.28	1.13	0.26	0.89	2	0.046	0.22
TLR2	-2.3	0.022	0.28	-0.4	0.69	0.98	-1.48	0.14	0.4
TSNAX	-2.31	0.022	0.28	1.27	0.21	0.88	2.85	0.0047	0.061
RAB11FIP4	-2.29	0.022	0.28	0.77	0.44	0.94	1.95	0.051	0.23
GBF1	2.3	0.022	0.28	0.92	0.36	0.93	-1.08	0.28	0.56
SYT7	-2.29	0.022	0.28	-1.38	0.17	0.86	2.29	0.022	0.14
VAPB	-2.29	0.022	0.28	-0.71	0.48	0.95	-0.82	0.41	0.68
MED14	2.3	0.022	0.28	2.15	0.032	0.68	-1.71	0.088	0.31
NUP58	2.29	0.022	0.28	1.04	0.3	0.91	-4.75	2.6e-06	0.00049
FCHSD2	2.29	0.022	0.28	1.25	0.21	0.88	-0.17	0.87	0.95
ACTR1B	-2.28	0.023	0.29	0.42	0.68	0.98	1.41	0.16	0.43
MRPL28	-2.29	0.023	0.28	-1.46	0.15	0.85	4.41	1.5e-05	0.0018
KHDRBS3	-2.28	0.023	0.29	0.62	0.54	0.97	1.35	0.18	0.45
SIX2	-2.28	0.023	0.28	0.3	0.77	0.99	-0.57	0.57	0.79
LOC107984562	-2.27	0.023	0.29	-1.16	0.25	0.89	-0.75	0.45	0.71
SPPL3	2.27	0.023	0.29	-0.47	0.64	0.98	-1	0.32	0.6
CCBE1	-2.27	0.023	0.29	-1.84	0.067	0.78	2.56	0.011	0.097
UBXN2A	2.28	0.023	0.28	1.51	0.13	0.83	-1.42	0.16	0.42
S1PR3	-2.28	0.023	0.28	0.84	0.4	0.94	0.77	0.44	0.7
ZNF626	-2.28	0.023	0.29	0.61	0.54	0.97	1.09	0.28	0.56
INTS6L	-2.28	0.023	0.29	-3.94	0.0001	0.18	2.05	0.041	0.21
FBL	2.29	0.023	0.28	2.23	0.027	0.66	-1.63	0.1	0.34
AKR7L	-2.27	0.023	0.29	-1.52	0.13	0.83	2.9	0.0039	0.055
FYB1	-2.29	0.023	0.28	-0.43	0.67	0.98	3.29	0.0011	0.027
AATF	2.28	0.023	0.28	-0.53	0.59	0.97	1.73	0.084	0.3
GHRHR	2.28	0.023	0.28	-0.03	0.98	1	-0.43	0.67	0.85
ANPEP	2.28	0.023	0.28	1.67	0.096	0.81	-3.72	0.00022	0.01
ITIH2	2.28	0.023	0.28	1.02	0.31	0.91	1.56	0.12	0.37
ZNF568	2.28	0.023	0.28	-1.37	0.17	0.86	1.33	0.19	0.46
KLHL5	-2.28	0.023	0.28	0.48	0.63	0.98	1.31	0.19	0.46
PITX2	-2.29	0.023	0.28	0.56	0.58	0.97	0.81	0.42	0.68
RCBTB1	-2.28	0.023	0.28	0.75	0.45	0.95	-0.78	0.44	0.7
RBM22	-2.27	0.023	0.29	-0.39	0.7	0.98	-0.25	0.8	0.92
KNL1	-2.29	0.023	0.28	-1.19	0.23	0.89	4.5	8.4e-06	0.0012
EP400	-2.28	0.023	0.28	-2.93	0.0035	0.53	1.61	0.11	0.35
SDC1	-2.28	0.023	0.28	-1.32	0.19	0.87	-0.27	0.78	0.91
SPP1	-2.28	0.023	0.28	-0.58	0.57	0.97	0.37	0.71	0.87
TRPC3	2.28	0.023	0.28	0.9	0.37	0.93	-2.45	0.015	0.12
TBC1D3	2.29	0.023	0.28	1.57	0.12	0.83	0.36	0.72	0.88
ARSJ	2.28	0.023	0.28	1.41	0.16	0.85	-0.93	0.35	0.63
SPATA22	-2.28	0.023	0.29	0.71	0.48	0.95	0.64	0.52	0.76
SLC16A7	-2.28	0.023	0.28	-0.03	0.97	1	0.24	0.81	0.92
CD8B2	2.27	0.023	0.29	1.48	0.14	0.84	-0.11	0.91	0.96
GINS1	-2.28	0.023	0.28	-1.07	0.28	0.9	2.13	0.034	0.18
JOSD1	-2.27	0.023	0.29	-0.56	0.58	0.97	0.9	0.37	0.64
DNAAF4-CCPG1	2.28	0.024	0.29	0.44	0.66	0.98	-3.01	0.0029	0.047
TM9SF1	2.26	0.024	0.29	0.38	0.71	0.98	-1.94	0.052	0.23
WDR6	2.26	0.024	0.29	1.65	0.1	0.81	-2.87	0.0043	0.059
KIF12	-2.26	0.024	0.29	0.01	0.99	1	1.67	0.095	0.32
EFCAB13	2.27	0.024	0.29	0.94	0.35	0.93	-0.84	0.4	0.67
C2orf73	2.27	0.024	0.29	-0.42	0.67	0.98	-1.41	0.16	0.42
CYP2E1	2.26	0.024	0.29	-0.74	0.46	0.95	0.58	0.56	0.79
CPNE2	-2.26	0.024	0.29	0.81	0.42	0.94	-1.28	0.2	0.48
ZNF777	-2.26	0.024	0.29	1.61	0.11	0.82	-0.63	0.53	0.76
SPINK4	2.27	0.024	0.29	-1.02	0.31	0.91	-0.19	0.85	0.94
SOX8	2.26	0.024	0.29	1.87	0.062	0.76	-3.51	0.00048	0.017
HLA-DOB	2.27	0.024	0.29	0.97	0.33	0.92	-0.8	0.42	0.69
HOXB1	-2.27	0.024	0.29	-1.42	0.15	0.85	3.39	0.00074	0.021
HPS1	2.27	0.024	0.29	-0.52	0.61	0.97	-1.08	0.28	0.56
ZNF680	-2.27	0.024	0.29	2.25	0.025	0.66	1.41	0.16	0.42
AMIGO2	2.26	0.024	0.29	1.27	0.2	0.87	-1.36	0.17	0.44
LOC440742	-2.28	0.024	0.29	-1.28	0.2	0.87	4.31	2.3e-05	0.0024
NFKBIA	2.27	0.024	0.29	1.61	0.11	0.82	-4.57	5.8e-06	0.00087
PCBP2	2.26	0.024	0.29	-1.26	0.21	0.88	-0.06	0.95	0.98
EXOSC3	2.27	0.024	0.29	-0.8	0.42	0.94	-0.73	0.47	0.72
COMMD10	2.26	0.024	0.29	-0.84	0.4	0.94	0.14	0.89	0.95
SERPINI2	-2.27	0.024	0.29	-0.67	0.51	0.96	1.82	0.069	0.27
KANSL3	-2.27	0.024	0.29	-0.16	0.87	1	0.47	0.64	0.83
MLST8	-2.27	0.024	0.29	-2.6	0.0096	0.58	-1.41	0.16	0.42
ST13	2.26	0.024	0.29	0.51	0.61	0.97	0.03	0.97	0.99
TNXB	2.26	0.024	0.29	-1.34	0.18	0.86	0.24	0.81	0.92
CAPN5	-2.26	0.024	0.29	-1.99	0.047	0.73	2.7	0.0072	0.077
UBE2I	2.26	0.024	0.29	0.44	0.66	0.98	-0.58	0.56	0.79
SF1	-2.27	0.024	0.29	-1.5	0.13	0.83	4.75	2.6e-06	0.00049
ABHD13	2.26	0.024	0.29	1.66	0.098	0.81	0.52	0.61	0.81
CERS5	-2.26	0.024	0.29	-0.01	0.99	1	0.47	0.64	0.83
LGI1	-2.26	0.024	0.29	-1.01	0.31	0.91	1.33	0.19	0.46
SPAG11B	-2.26	0.025	0.29	-1.01	0.31	0.91	2	0.046	0.22
ERMAP	-2.26	0.025	0.29	0.02	0.98	1	2.29	0.023	0.15
ALPK2	-2.25	0.025	0.3	1.2	0.23	0.88	-2	0.046	0.22
BHLHA15	-2.25	0.025	0.3	0.73	0.46	0.95	-0.72	0.47	0.72
DNAH9	2.26	0.025	0.29	-0.32	0.75	0.99	1.03	0.3	0.59
ESRRB	2.25	0.025	0.29	0.26	0.8	0.99	0.92	0.36	0.63
LAMB4	-2.26	0.025	0.29	-1.52	0.13	0.83	1.3	0.19	0.47
POTEH	-2.25	0.025	0.29	-0.43	0.67	0.98	-0.17	0.87	0.95
RNF175	2.25	0.025	0.3	-0.32	0.75	0.99	-2.19	0.029	0.17
UBE2E4P	-2.25	0.025	0.29	1.95	0.052	0.73	0.92	0.36	0.63
C5orf34	-2.25	0.025	0.3	0.01	0.99	1	1.43	0.15	0.42
DBX2	-2.25	0.025	0.29	-1.67	0.095	0.81	1.91	0.057	0.24
IL21R	-2.25	0.025	0.29	-0.16	0.87	1	-1.47	0.14	0.4
CLEC4A	-2.24	0.025	0.3	-0.8	0.43	0.94	2.46	0.014	0.11
PDE6G	-2.24	0.025	0.3	-0.08	0.93	1	1.3	0.19	0.47
OSER1	-2.26	0.025	0.29	0.75	0.45	0.95	0.63	0.53	0.76
GINS2	-2.25	0.025	0.29	-0.13	0.9	1	0.87	0.38	0.66
PEX13	2.25	0.025	0.29	0.15	0.88	1	-1.02	0.31	0.59
PHKA2	2.24	0.025	0.3	-0.37	0.71	0.98	0.07	0.95	0.98
ARL8B	-2.24	0.025	0.3	0.51	0.61	0.97	0.08	0.93	0.97
TSNAXIP1	-2.25	0.025	0.3	-0.95	0.34	0.92	2.46	0.015	0.11
C15orf39	-2.26	0.025	0.29	-1.01	0.31	0.91	3.57	0.00042	0.015
FAM160B1	2.26	0.025	0.29	0.98	0.33	0.92	-1.77	0.077	0.29
SKP1	-2.25	0.025	0.3	-1.04	0.3	0.91	0.94	0.35	0.62
ZNF236	2.24	0.025	0.3	-0.52	0.6	0.97	2	0.046	0.22
RNASEH2B	-2.26	0.025	0.29	0.08	0.94	1	2.02	0.044	0.21
NUBPL	2.26	0.025	0.29	1.29	0.2	0.87	-2	0.047	0.22
USP9X	-2.24	0.025	0.3	-0.73	0.47	0.95	3.32	0.00096	0.025
LIPF	-2.25	0.025	0.29	-2.14	0.033	0.68	0.83	0.41	0.68
AP3B1	-2.25	0.025	0.29	-0.77	0.44	0.94	4.28	2.2e-05	0.0024
MELK	-2.24	0.025	0.3	0.99	0.32	0.92	-2.75	0.006	0.071
APOC4-APOC2	2.24	0.026	0.3	0.47	0.64	0.98	-3.86	0.00013	0.0069
DHRS9	-2.23	0.026	0.3	-0.47	0.64	0.98	1.06	0.29	0.57
TRAIP	-2.23	0.026	0.3	-0.59	0.56	0.97	3.45	0.0006	0.019
PRMT5	2.23	0.026	0.3	-0.66	0.51	0.96	0.8	0.43	0.69
COL4A4	2.23	0.026	0.3	-1.27	0.21	0.88	-3.42	0.00067	0.02
COL6A1	2.24	0.026	0.3	0.53	0.6	0.97	-2.01	0.045	0.22
SEPT10	-2.24	0.026	0.3	0.01	0.99	1	-0.44	0.66	0.84
C9orf66	2.23	0.026	0.3	1.26	0.21	0.88	-1.06	0.29	0.57
CYP24A1	2.23	0.026	0.3	-2	0.046	0.73	-4.01	6.7e-05	0.0046
DGKG	-2.23	0.026	0.3	0.41	0.68	0.98	5.35	1.2e-07	6.8e-05
C10orf25	-2.24	0.026	0.3	-0.78	0.44	0.94	2.03	0.043	0.21
MON2	2.23	0.026	0.3	1	0.32	0.91	-1.11	0.27	0.55
BICD2	-2.23	0.026	0.3	0.36	0.72	0.98	0.55	0.59	0.8
SACS	-2.23	0.026	0.3	0.69	0.49	0.96	1	0.32	0.6
GSTA4	2.23	0.026	0.3	-2.22	0.027	0.66	0.88	0.38	0.65
ZNF391	-2.25	0.026	0.3	-0.49	0.63	0.98	0.34	0.74	0.89
ERVFRD-1	-2.23	0.026	0.3	0.3	0.77	0.99	2.22	0.027	0.16
TVP23B	2.23	0.026	0.3	-0.87	0.38	0.93	-0.96	0.34	0.62
PDE4A	2.24	0.026	0.3	0.66	0.51	0.96	-0.28	0.78	0.91
PPEF1	2.23	0.026	0.3	0.43	0.67	0.98	-3.35	0.00085	0.023
IL17RD	-2.24	0.026	0.3	-1.49	0.14	0.84	1.91	0.056	0.24
PLEKHB2	2.23	0.026	0.3	0.1	0.92	1	0.41	0.68	0.86
CNDP2	2.23	0.026	0.3	0.76	0.44	0.94	1.08	0.28	0.56
FAM45BP	-2.24	0.026	0.3	1.32	0.19	0.87	0.85	0.4	0.67
ST6GAL1	-2.23	0.026	0.3	0.57	0.57	0.97	2.21	0.028	0.16
VRK1	-2.23	0.026	0.3	-0.52	0.6	0.97	1.96	0.05	0.23
GAL3ST4	-2.23	0.026	0.3	-1.66	0.097	0.81	0.91	0.37	0.64
MCTP1	-2.23	0.026	0.3	0.52	0.6	0.97	-0.24	0.81	0.92
ACTL8	-2.23	0.026	0.3	0.22	0.83	0.99	0.9	0.37	0.64
ELOVL3	2.23	0.026	0.3	-0.82	0.41	0.94	0.13	0.9	0.96
ARHGEF2	2.24	0.026	0.3	1.32	0.19	0.87	0.86	0.39	0.66
RAB11B	2.23	0.026	0.3	-0.01	0.99	1	-0.21	0.83	0.93
CYTH1	-2.24	0.026	0.3	-0.99	0.32	0.92	0.06	0.95	0.98
TBC1D31	2.23	0.026	0.3	-0.31	0.76	0.99	-1.33	0.18	0.45
TNFSF8	2.24	0.026	0.3	-0.19	0.85	0.99	2.25	0.025	0.15
H6PD	-2.23	0.026	0.3	-0.4	0.69	0.98	2.42	0.016	0.12
CD59	2.24	0.026	0.3	0.02	0.99	1	0.39	0.7	0.87
THRAP3	-2.24	0.026	0.3	-0.1	0.92	1	1.27	0.21	0.48
NRG3	-2.22	0.027	0.3	1.04	0.3	0.91	0.24	0.81	0.92
FAF1	-2.22	0.027	0.3	0.65	0.52	0.96	2.71	0.0069	0.076
SYT2	-2.21	0.027	0.31	-0.01	1	1	0.88	0.38	0.65
FGFBP3	-2.22	0.027	0.31	-0.39	0.7	0.98	1.89	0.06	0.25
GLIPR2	2.23	0.027	0.3	3.65	0.00031	0.3	-1.62	0.11	0.34
LINC00518	-2.22	0.027	0.3	-0.85	0.4	0.94	1.75	0.081	0.3
WDR47	-2.22	0.027	0.3	-1.82	0.069	0.78	3.96	8.4e-05	0.0053
NMNAT2	2.22	0.027	0.3	0.88	0.38	0.93	-0.87	0.39	0.66
CACNG5	2.22	0.027	0.3	1.6	0.11	0.82	-0.53	0.6	0.81
RPL7L1	2.23	0.027	0.3	0.54	0.59	0.97	-0.43	0.67	0.85
LRIT2	-2.21	0.027	0.31	1.1	0.27	0.9	-0.2	0.84	0.94
GSTM2P1	2.22	0.027	0.3	-0.37	0.71	0.98	-1.89	0.06	0.25
DUSP13	-2.21	0.027	0.3	1.29	0.2	0.87	1.09	0.28	0.56
PIPOX	2.22	0.027	0.3	-0.58	0.56	0.97	-2.2	0.028	0.17
KLHL11	-2.22	0.027	0.3	-3.24	0.0013	0.43	2.81	0.0051	0.064
CRTAM	-2.22	0.027	0.3	0.98	0.33	0.92	3.16	0.0017	0.034
PSMB8	2.21	0.027	0.31	-0.89	0.37	0.93	-1.28	0.2	0.48
SMAGP	2.23	0.027	0.3	0.91	0.36	0.93	-4.22	3.2e-05	0.003
TLDC1	-2.22	0.027	0.3	0.31	0.75	0.99	1.59	0.11	0.36
PCIF1	-2.23	0.027	0.3	-1.04	0.3	0.91	-0.77	0.44	0.7
ALG1L2	2.22	0.027	0.3	-0.2	0.84	0.99	-2.02	0.044	0.21
SPTBN2	-2.23	0.027	0.3	1.66	0.098	0.81	2.07	0.039	0.2
MORN2	-2.22	0.027	0.3	-0.05	0.96	1	3.86	0.00014	0.0074
UGP2	2.22	0.027	0.3	0.53	0.59	0.97	-1.75	0.081	0.3
KDELC1	-2.23	0.027	0.3	0.6	0.55	0.97	1.56	0.12	0.37
MIXL1	-2.22	0.027	0.3	1.93	0.054	0.74	0.92	0.36	0.63
CDKL1	2.22	0.027	0.3	1.88	0.06	0.76	-2.55	0.011	0.098
CCNA2	-2.21	0.027	0.3	-0.59	0.56	0.97	-0.25	0.8	0.92
HOMER2	-2.21	0.027	0.3	-0.02	0.98	1	1.03	0.3	0.58
USP15	-2.22	0.027	0.3	-0.75	0.45	0.95	-0.17	0.87	0.95
LIMS4&LIMS3	-2.2	0.028	0.31	-0.93	0.35	0.93	1.3	0.2	0.47
CETP	-2.2	0.028	0.31	0.81	0.42	0.94	0.8	0.42	0.69
HSPH1	-2.21	0.028	0.31	1.04	0.3	0.91	2.47	0.014	0.11
COL1A1	2.21	0.028	0.31	-0.01	0.99	1	0.45	0.65	0.84
CST2	-2.21	0.028	0.31	0.61	0.54	0.97	1.53	0.13	0.38
F2RL2	-2.2	0.028	0.31	0.41	0.68	0.98	0.68	0.49	0.74
JAZF1	-2.2	0.028	0.31	1.44	0.15	0.85	0.49	0.62	0.82
NCBP2	-2.21	0.028	0.31	1.68	0.093	0.81	-0.36	0.72	0.88
FMO5	2.21	0.028	0.31	-1.22	0.22	0.88	-2.27	0.024	0.15
OR51B5	-2.21	0.028	0.31	0.52	0.6	0.97	-2.54	0.011	0.1
RCOR2	2.2	0.028	0.31	1.1	0.27	0.9	-0.54	0.59	0.81
GTF3C1	-2.2	0.028	0.31	0.27	0.79	0.99	-0.17	0.86	0.95
OR11L1	2.21	0.028	0.31	-0.43	0.66	0.98	2.53	0.012	0.1
ANKRD65	2.2	0.028	0.31	1.61	0.11	0.82	-0.46	0.65	0.84
YARS2	2.21	0.028	0.31	0.42	0.67	0.98	-2.35	0.019	0.13
PLIN1	-2.21	0.028	0.31	0.62	0.53	0.97	1.9	0.058	0.25
POU4F1	-2.2	0.028	0.31	0.47	0.64	0.98	1	0.32	0.6
NCBP3	2.2	0.028	0.31	-0.64	0.52	0.96	-1.56	0.12	0.37
IFT122	-2.21	0.028	0.31	0.17	0.87	1	0.28	0.78	0.91
PSMA6	2.2	0.028	0.31	1.19	0.24	0.89	-3.4	0.00072	0.021
OPN1LW	2.21	0.028	0.31	0.23	0.81	0.99	-1.53	0.13	0.38
WNT9B	-2.21	0.028	0.31	0.66	0.51	0.96	-1.68	0.094	0.32
PTP4A1	2.21	0.028	0.31	0.28	0.78	0.99	-3.3	0.001	0.026
TVP23A	-2.21	0.028	0.31	-0.35	0.73	0.99	-1.09	0.28	0.56
CACNB1	2.2	0.028	0.31	-0.33	0.74	0.99	-2.45	0.015	0.12
DCAF10	-2.21	0.028	0.31	-1.22	0.22	0.88	2.53	0.012	0.1
ELMO3	-2.21	0.028	0.31	0.16	0.87	1	0.01	0.99	1
QRICH2	2.21	0.028	0.31	-0.28	0.78	0.99	0.32	0.75	0.89
CEP95	-2.2	0.028	0.31	0.38	0.71	0.98	0.37	0.71	0.87
CRIPT	-2.2	0.028	0.31	-0.41	0.68	0.98	2.42	0.016	0.12
ADAMTS2	-2.2	0.028	0.31	1.6	0.11	0.82	0.57	0.57	0.79
TATDN2	2.21	0.028	0.31	-1.97	0.05	0.73	-0.38	0.7	0.87
DSCR3	2.19	0.029	0.31	-2.47	0.014	0.61	0.17	0.87	0.95
TIMM17A	2.19	0.029	0.31	1.62	0.11	0.82	-1.77	0.078	0.29
CGRRF1	-2.19	0.029	0.31	0.98	0.33	0.92	2.26	0.024	0.15
CNPY3-GNMT	2.18	0.029	0.32	2.41	0.016	0.63	-2.73	0.0065	0.073
AHCYL1	2.19	0.029	0.31	-1.32	0.19	0.87	-0.18	0.86	0.94
GPR83	2.19	0.029	0.31	0.62	0.53	0.97	-1.13	0.26	0.54
CHN1	-2.19	0.029	0.31	0.36	0.72	0.98	1.87	0.062	0.26
BEST3	-2.19	0.029	0.31	-0.65	0.52	0.96	1.66	0.097	0.33
C2orf15	2.19	0.029	0.32	0.3	0.77	0.99	-0.56	0.57	0.79
DRG2	2.19	0.029	0.31	-0.33	0.74	0.99	-1.34	0.18	0.45
TCTEX1D1	2.19	0.029	0.31	2.01	0.045	0.73	-1.34	0.18	0.45
OR5T2	2.19	0.029	0.31	2.15	0.032	0.68	-1.17	0.24	0.52
LCORL	-2.19	0.029	0.31	0.22	0.83	0.99	0.53	0.6	0.81
OR10H3	-2.19	0.029	0.31	0.22	0.82	0.99	0.18	0.86	0.94
FAM102B	-2.19	0.029	0.32	0.93	0.35	0.93	0.74	0.46	0.72
TBC1D3B	2.19	0.029	0.32	0.38	0.71	0.98	-4.06	5.7e-05	0.0043
MAP3K3	-2.19	0.029	0.31	0.05	0.96	1	0.74	0.46	0.71
MNT	-2.19	0.029	0.31	-1.32	0.19	0.87	-2.06	0.039	0.2
MOG	2.19	0.029	0.31	1.49	0.14	0.84	0.12	0.9	0.96
ANKFY1	2.19	0.029	0.31	-0.37	0.71	0.98	-1.32	0.19	0.46
POLE	-2.19	0.029	0.31	-2.38	0.018	0.63	3.26	0.0012	0.028
ZDHHC13	-2.19	0.029	0.32	1.09	0.28	0.9	4.01	7.6e-05	0.0049
PPP2R3C	2.2	0.029	0.31	-2.06	0.04	0.72	0.42	0.67	0.85
TRPC7	-2.18	0.029	0.32	0	1	1	1.39	0.17	0.43
SARS	2.19	0.029	0.32	-1.57	0.12	0.83	0.32	0.75	0.89
SYK	-2.19	0.029	0.31	-0.8	0.42	0.94	0.97	0.33	0.61
TFAP4	2.19	0.029	0.31	0.39	0.7	0.98	3.61	0.00032	0.013
PSCA	2.2	0.029	0.31	-0.34	0.73	0.99	-0.05	0.96	0.98
EIF3H	2.19	0.029	0.31	0.43	0.67	0.98	-1.45	0.15	0.41
CCNG2	2.19	0.029	0.31	-2	0.045	0.73	2.15	0.032	0.18
ZNF625-ZNF20	2.17	0.03	0.32	0.17	0.87	1	0.26	0.8	0.92
TUBGCP3	2.18	0.03	0.32	1.12	0.27	0.9	0.19	0.85	0.94
CSRP1	2.18	0.03	0.32	1.99	0.047	0.73	-3.07	0.0024	0.042
FAM163A	-2.18	0.03	0.32	0.73	0.46	0.95	2.05	0.042	0.21
DGKH	2.17	0.03	0.32	-0.42	0.68	0.98	0.29	0.77	0.9
DSC3	2.17	0.03	0.32	1.05	0.3	0.91	-1.46	0.15	0.41
FAH	-2.18	0.03	0.32	0.57	0.57	0.97	1.18	0.24	0.52
FCGR1A	2.17	0.03	0.32	0.93	0.35	0.93	-2.74	0.0064	0.072
POFUT1	-2.17	0.03	0.32	-0.36	0.72	0.98	-1.7	0.09	0.32
GALT	-2.17	0.03	0.32	-0.14	0.89	1	0.78	0.44	0.7
ZNF311	-2.17	0.03	0.32	-1	0.32	0.92	2.72	0.0067	0.074
NT5C	2.18	0.03	0.32	-0.97	0.33	0.92	-0.22	0.83	0.93
KCNF1	-2.18	0.03	0.32	-0.43	0.66	0.98	1.2	0.23	0.51
C10orf113	-2.18	0.03	0.32	0.75	0.45	0.95	-1.14	0.26	0.54
ARL13A	2.18	0.03	0.32	-0.65	0.52	0.96	-1.89	0.06	0.25
SHC4	-2.17	0.03	0.32	1.45	0.15	0.85	1.21	0.23	0.51
TRIT1	-2.17	0.03	0.32	-1.03	0.3	0.91	2.09	0.037	0.19
ZNF334	-2.18	0.03	0.32	-0.13	0.9	1	0.22	0.82	0.93
PRDM8	2.18	0.03	0.32	-0.49	0.62	0.97	-2.57	0.011	0.096
RBP1	2.17	0.03	0.32	0.97	0.33	0.92	-0.24	0.81	0.92
MCUR1	2.17	0.03	0.32	-1.24	0.22	0.88	2.56	0.011	0.096
NSD1	2.18	0.03	0.32	0.44	0.66	0.98	-3.86	0.00012	0.0067
NADK	-2.18	0.03	0.32	-0.8	0.42	0.94	3.15	0.0017	0.034
LGALS9C	-2.18	0.03	0.32	-2.09	0.037	0.71	1.83	0.068	0.27
STAR	-2.18	0.03	0.32	-1.55	0.12	0.83	-1.15	0.25	0.53
DYNLT3	2.18	0.03	0.32	1.08	0.28	0.9	-2.67	0.0078	0.081
SERPING1	-2.17	0.03	0.32	-0.56	0.58	0.97	-2.55	0.011	0.098
LOC728554	-2.17	0.03	0.32	-0.27	0.79	0.99	1.36	0.17	0.44
UCP1	2.18	0.03	0.32	-0.3	0.77	0.99	-1.32	0.19	0.46
CUL5	2.18	0.03	0.32	0.86	0.39	0.94	-1.83	0.068	0.27
TMEM128	-2.17	0.03	0.32	-1.66	0.098	0.81	3.14	0.0018	0.035
FAM207A	2.18	0.03	0.32	-0.89	0.37	0.93	-1.11	0.27	0.55
KCNK5	2.17	0.03	0.32	1.5	0.13	0.84	-1.01	0.31	0.59
MYOT	-2.18	0.03	0.32	-1.17	0.24	0.89	1.63	0.1	0.34
GUSBP9&LOC100653061&SMA5&GUSBP2&GUSBP3	-2.17	0.031	0.32	-2.04	0.042	0.73	0.93	0.35	0.63
TUBA1B	2.17	0.031	0.32	0.24	0.81	0.99	-3.37	0.00082	0.023
PIAS3	-2.17	0.031	0.32	-0.03	0.98	1	1.36	0.18	0.44
ARPC1A	2.16	0.031	0.33	-0.08	0.94	1	-1.48	0.14	0.4
TOB2	-2.16	0.031	0.32	-0.7	0.48	0.95	3.32	0.00096	0.025
SLCO2B1	2.16	0.031	0.32	-1.26	0.21	0.88	1.17	0.24	0.53
OR2M3	2.17	0.031	0.32	-0.49	0.62	0.97	-0.49	0.62	0.82
ANKRD35	2.16	0.031	0.33	0.71	0.48	0.95	-1.46	0.15	0.41
EPHB2	-2.16	0.031	0.33	0.8	0.42	0.94	0.59	0.56	0.78
NFASC	-2.16	0.031	0.32	0.72	0.47	0.95	-1.48	0.14	0.4
NPTXR	2.16	0.031	0.32	-0.53	0.6	0.97	2.59	0.0098	0.092
DEFB119	-2.17	0.031	0.32	-0.88	0.38	0.93	1.33	0.18	0.46
FAM83H	2.17	0.031	0.32	1.26	0.21	0.88	-1.48	0.14	0.4
IFNA2	-2.17	0.031	0.32	-0.28	0.78	0.99	1.75	0.081	0.3
JUN	2.16	0.031	0.32	-2.4	0.017	0.63	-0.17	0.86	0.95
CLEC18B	-2.17	0.031	0.32	-0.6	0.55	0.97	2.6	0.01	0.093
TLR9	2.17	0.031	0.32	1.83	0.068	0.78	-1.9	0.058	0.25
APBB1IP	-2.16	0.031	0.33	0.33	0.74	0.99	2.13	0.033	0.18
RCVRN	-2.16	0.031	0.33	-0.71	0.48	0.95	1.27	0.2	0.48
CES5AP1	2.16	0.031	0.33	0.26	0.79	0.99	-3.01	0.0028	0.046
SIX3	2.16	0.031	0.32	0.22	0.82	0.99	2.42	0.016	0.12
TWIST1	2.16	0.031	0.32	0.13	0.9	1	-1.93	0.055	0.24
NSUN7	-2.16	0.031	0.32	-2.05	0.041	0.73	3.05	0.0024	0.042
RPAP2	-2.17	0.031	0.32	0.43	0.66	0.98	3.24	0.0013	0.03
GRHL2	2.17	0.031	0.32	0.51	0.61	0.97	-1.45	0.15	0.41
TMEM185A	2.17	0.031	0.32	-0.61	0.54	0.97	-2.4	0.017	0.12
HPS4	-2.16	0.031	0.33	-0.06	0.96	1	1.23	0.22	0.5
CACNA2D4	2.17	0.031	0.32	-0.05	0.96	1	0.11	0.91	0.97
PPT2-EGFL8	-2.15	0.032	0.33	-0.67	0.51	0.96	1.95	0.052	0.23
ENOX2	-2.15	0.032	0.33	0.82	0.41	0.94	-0.2	0.84	0.94
OR4K14	2.15	0.032	0.33	-0.68	0.5	0.96	0.34	0.74	0.89
CCR4	2.15	0.032	0.33	-0.61	0.54	0.97	-3.16	0.0016	0.033
TMEM182	2.15	0.032	0.33	0.61	0.54	0.97	0.45	0.65	0.84
ZNF480	2.15	0.032	0.33	0.29	0.77	0.99	-0.66	0.51	0.75
TCEAL6	-2.15	0.032	0.33	-0.87	0.38	0.93	2.16	0.032	0.18
EMC1	-2.15	0.032	0.33	-0.58	0.56	0.97	-0.96	0.34	0.62
TMEM2	2.15	0.032	0.33	1.5	0.14	0.84	-0.86	0.39	0.66
GRB10	2.15	0.032	0.33	1.05	0.3	0.91	-0.15	0.88	0.95
IL11	2.15	0.032	0.33	-0.12	0.91	1	-3.15	0.0017	0.035
AQP3	-2.15	0.032	0.33	-0.15	0.88	1	2.3	0.022	0.14
MTF1	-2.14	0.032	0.33	-1.51	0.13	0.83	0.48	0.63	0.83
NDUFA2	-2.15	0.032	0.33	-1.02	0.31	0.91	2.13	0.034	0.18
RSL24D1	2.15	0.032	0.33	0.6	0.55	0.97	-0.68	0.5	0.74
HIKESHI	-2.15	0.032	0.33	-0.07	0.94	1	1.54	0.13	0.38
ANLN	2.16	0.032	0.33	1.88	0.061	0.76	-0.82	0.41	0.68
PDP1	-2.15	0.032	0.33	-0.43	0.67	0.98	1.27	0.2	0.48
SLC39A9	-2.15	0.032	0.33	-1.29	0.2	0.87	-0.17	0.86	0.95
ENY2	-2.15	0.032	0.33	1.74	0.083	0.8	1.32	0.19	0.46
CD177	-2.16	0.032	0.33	-1.79	0.074	0.79	0.81	0.42	0.68
LYRM1	-2.16	0.032	0.33	0.88	0.38	0.93	-0.97	0.33	0.61
SETSIP	-2.15	0.032	0.33	-1.56	0.12	0.83	-0.15	0.88	0.95
SYPL1	-2.15	0.032	0.33	0.13	0.89	1	-0.62	0.54	0.77
TAGLN	-2.15	0.032	0.33	-0.41	0.68	0.98	-1.24	0.22	0.49
HNF1B	2.14	0.032	0.33	-0.52	0.6	0.97	1.76	0.078	0.29
SESN2	2.16	0.032	0.33	0.1	0.92	1	-1.31	0.19	0.47
ZNF528	-2.15	0.032	0.33	-0.79	0.43	0.94	1.1	0.27	0.55
TRADD	2.15	0.032	0.33	0.19	0.85	0.99	-3.2	0.0015	0.032
ZNF592	-2.16	0.032	0.33	-2.3	0.022	0.64	1.38	0.17	0.43
PAICS	2.14	0.033	0.33	1.12	0.26	0.89	1.3	0.19	0.47
KIF18B	2.15	0.033	0.33	1.17	0.24	0.89	2.45	0.015	0.12
ADRB3	-2.14	0.033	0.33	-0.96	0.34	0.92	-1.03	0.3	0.58
TTC33	2.14	0.033	0.33	1.31	0.19	0.87	0.14	0.89	0.96
BRD1	-2.14	0.033	0.33	-1.32	0.19	0.87	4.33	1.7e-05	0.002
NECTIN3	-2.13	0.033	0.33	-1.48	0.14	0.84	1.28	0.2	0.48
TSPAN16	-2.14	0.033	0.33	-1.32	0.19	0.87	0.04	0.96	0.98
TOR2A	-2.14	0.033	0.33	0.79	0.43	0.94	3.41	0.00075	0.021
GNRH1	-2.14	0.033	0.33	0.45	0.65	0.98	2.8	0.0055	0.067
HADHA	2.14	0.033	0.33	-0.84	0.4	0.94	0.37	0.71	0.87
HSP90AA1	-2.14	0.033	0.33	0.93	0.35	0.93	-0.27	0.79	0.91
IL12A	-2.14	0.033	0.33	-0.2	0.84	0.99	0.55	0.58	0.8
C5orf46	2.14	0.033	0.33	0.12	0.9	1	-1.03	0.3	0.58
SPATA31D4	2.14	0.033	0.33	0.63	0.53	0.96	-1.6	0.11	0.35
ART3	2.14	0.033	0.33	1.52	0.13	0.83	0.86	0.39	0.66
MSI1	2.14	0.033	0.33	0.23	0.82	0.99	0.8	0.43	0.69
PLD2	2.14	0.033	0.33	-0.23	0.82	0.99	0.71	0.48	0.73
PPP1R3D	-2.13	0.033	0.33	-0.86	0.39	0.93	2.67	0.0078	0.081
KYAT3	2.14	0.033	0.33	0.9	0.37	0.93	-1.24	0.22	0.49
PRTFDC1	-2.14	0.033	0.33	-1.14	0.25	0.89	0.18	0.85	0.94
SLC44A2	-2.15	0.033	0.33	-0.08	0.94	1	0.72	0.47	0.73
SCOC	-2.14	0.033	0.33	0.89	0.37	0.93	2.45	0.015	0.12
SCN2A	2.13	0.033	0.33	0.15	0.88	1	0.16	0.87	0.95
DRGX	-2.14	0.033	0.33	-0.6	0.55	0.97	1.4	0.16	0.43
ZSWIM4	-2.14	0.033	0.33	0.08	0.94	1	4.25	2.9e-05	0.0028
SULT2A1	2.14	0.033	0.33	1.21	0.23	0.88	-1.14	0.25	0.53
MAP3K7	2.14	0.033	0.33	0.08	0.94	1	-2.35	0.019	0.13
BCL2L14	-2.14	0.033	0.33	0.21	0.84	0.99	1.29	0.2	0.47
FBXO31	-2.14	0.033	0.33	-1.79	0.074	0.79	2.94	0.0036	0.052
SHARPIN	2.14	0.033	0.33	0.89	0.37	0.93	-0.13	0.9	0.96
NAA38	2.14	0.033	0.33	2.15	0.032	0.68	-1.16	0.25	0.53
EGLN2	2.13	0.034	0.34	0.12	0.91	1	-1.09	0.28	0.56
SMG6	-2.13	0.034	0.34	1.57	0.12	0.83	0.52	0.61	0.81
PUM2	-2.12	0.034	0.34	-1	0.32	0.91	1.3	0.19	0.47
AMD1	2.12	0.034	0.34	-0.16	0.87	1	-1.61	0.11	0.35
STK36	-2.12	0.034	0.34	-0.09	0.93	1	2.69	0.0073	0.078
GPKOW	2.14	0.034	0.33	0.3	0.77	0.99	-0.86	0.39	0.66
GPI	-2.13	0.034	0.34	0.76	0.45	0.94	1.08	0.28	0.56
CD209	2.13	0.034	0.33	-0.56	0.58	0.97	-2.27	0.024	0.15
TMEM189-UBE2V1	-2.13	0.034	0.33	1.24	0.22	0.88	1.19	0.24	0.52
KRTAP5-5	2.13	0.034	0.33	1.5	0.13	0.84	-1.05	0.3	0.58
MYH2	2.13	0.034	0.33	0.68	0.49	0.96	0.87	0.39	0.66
ATF1	2.12	0.034	0.34	0.62	0.54	0.97	0.53	0.6	0.81
STMN3	-2.12	0.034	0.34	0.03	0.98	1	2.62	0.009	0.088
INPP5K	-2.12	0.034	0.34	1.34	0.18	0.87	1.56	0.12	0.37
MTPAP	2.14	0.034	0.33	-0.85	0.4	0.94	0.41	0.69	0.86
ITLN1	2.13	0.034	0.34	-0.83	0.41	0.94	-3.21	0.0014	0.031
WDR12	2.13	0.034	0.34	0.37	0.71	0.98	0.52	0.6	0.81
MAP3K7CL	-2.12	0.034	0.34	-0.65	0.51	0.96	1.31	0.19	0.46
RECQL	2.13	0.034	0.34	0.62	0.54	0.97	-4.01	6.9e-05	0.0047
RNF123	-2.12	0.034	0.34	0.68	0.5	0.96	-3.16	0.0016	0.034
SCX	-2.13	0.034	0.34	0.8	0.42	0.94	0.31	0.76	0.9
LOC644936	-2.13	0.034	0.33	-1.31	0.19	0.87	2.39	0.017	0.13
CSRNP1	2.14	0.034	0.33	-0.35	0.73	0.98	-0.1	0.92	0.97
GSTTP2	-2.13	0.034	0.34	0.03	0.97	1	0.64	0.52	0.76
SMARCA1	2.12	0.034	0.34	0.11	0.91	1	2.61	0.0093	0.089
ZNF3	2.12	0.034	0.34	1.22	0.22	0.88	-1.08	0.28	0.56
PCGF2	-2.13	0.034	0.33	-2.37	0.018	0.63	-0.43	0.67	0.85
NAA11	2.13	0.034	0.34	-1.2	0.23	0.88	0.88	0.38	0.65
UBE2M	-2.12	0.034	0.34	-1.6	0.11	0.82	1.18	0.24	0.52
FIBP	2.13	0.034	0.33	-0.43	0.66	0.98	-0.52	0.6	0.81
SNAP29	-2.13	0.034	0.33	-0.54	0.59	0.97	4.22	2.8e-05	0.0027
ZBTB40	-2.12	0.034	0.34	1.79	0.074	0.79	-0.94	0.35	0.63
TENM1	2.11	0.035	0.34	-1.32	0.19	0.87	-2.51	0.013	0.11
COL8A2	2.12	0.035	0.34	-0.1	0.92	1	4.37	1.5e-05	0.0018
DENND1B	2.11	0.035	0.34	-1.81	0.07	0.78	-2.38	0.018	0.13
DUSP5	-2.11	0.035	0.34	0.54	0.59	0.97	0.88	0.38	0.65
FGF12	-2.11	0.035	0.34	0.37	0.71	0.98	1.78	0.075	0.29
CFAP126	2.12	0.035	0.34	0.15	0.88	1	0.08	0.94	0.98
ABTB2	-2.12	0.035	0.34	-0.82	0.41	0.94	3.53	0.00045	0.016
ERC2	-2.12	0.035	0.34	-1.9	0.058	0.75	3.26	0.0013	0.029
KCNV1	-2.12	0.035	0.34	1.2	0.23	0.88	1.11	0.27	0.55
HLA-F	2.12	0.035	0.34	-0.23	0.82	0.99	0.07	0.95	0.98
HPR	2.11	0.035	0.34	0.58	0.56	0.97	0.48	0.63	0.83
KRTAP13-3	-2.12	0.035	0.34	-0.24	0.81	0.99	1.29	0.2	0.47
MYH1	-2.12	0.035	0.34	-0.75	0.45	0.95	1.45	0.15	0.41
NDUFB3	-2.12	0.035	0.34	1.05	0.3	0.91	1.72	0.086	0.31
OTX2	2.11	0.035	0.34	1.35	0.18	0.86	-0.17	0.86	0.95
DUXA	-2.11	0.035	0.34	-1.28	0.2	0.87	0.26	0.79	0.92
PCSK6	2.12	0.035	0.34	-1.39	0.16	0.86	-0.55	0.58	0.8
SNTG1	-2.12	0.035	0.34	-2.36	0.019	0.63	0.82	0.42	0.68
TMEM45A	2.11	0.035	0.34	-0.72	0.47	0.95	-0.69	0.49	0.74
PBRM1	2.11	0.035	0.34	0.9	0.37	0.93	-4.3	2e-05	0.0022
TMEM140	2.11	0.035	0.34	-1.37	0.17	0.86	-0.56	0.58	0.8
ZNF280C	2.12	0.035	0.34	-1.43	0.15	0.85	-2.14	0.033	0.18
ENPP5	-2.11	0.035	0.34	-1.11	0.27	0.9	1.16	0.25	0.53
FAM74A6	-2.12	0.035	0.34	-0.39	0.69	0.98	-0.64	0.52	0.76
ZNF23	2.12	0.035	0.34	1.11	0.27	0.9	-0.48	0.63	0.83
GGCT	-2.12	0.035	0.34	-2.71	0.007	0.57	2.81	0.0053	0.065
PAAF1	-2.11	0.035	0.34	-0.93	0.35	0.93	2.42	0.016	0.12
CASK	-2.11	0.035	0.34	1.54	0.13	0.83	-2.74	0.0064	0.072
LINC01361&LOC105369547&LOC105377362	2.11	0.036	0.34	1.1	0.27	0.9	2.52	0.012	0.1
AKR1A1	2.1	0.036	0.35	0.52	0.6	0.97	-2.9	0.0038	0.055
LOC107984838	-2.1	0.036	0.34	-0.08	0.93	1	1.98	0.048	0.22
CPB2	2.11	0.036	0.34	0.56	0.58	0.97	-2.3	0.022	0.14
CRYBA4	2.1	0.036	0.35	-0.21	0.83	0.99	2.42	0.016	0.12
MAPK14	-2.1	0.036	0.34	-0.25	0.81	0.99	3.24	0.0013	0.029
MYADML	2.11	0.036	0.34	0.66	0.51	0.96	-0.78	0.44	0.7
ZNF540	2.1	0.036	0.34	0.57	0.57	0.97	-2.58	0.01	0.094
ADGRG3	2.1	0.036	0.34	0.23	0.82	0.99	-0.58	0.56	0.78
COPG1	2.1	0.036	0.35	0.38	0.7	0.98	-0.01	1	1
ADGRL1	-2.1	0.036	0.34	-0.58	0.56	0.97	2.07	0.039	0.2
STAP1	2.1	0.036	0.35	1.25	0.21	0.88	1.19	0.24	0.52
GNL3	2.1	0.036	0.34	0.05	0.96	1	0.85	0.4	0.67
GLUD1	2.1	0.036	0.35	-2.09	0.037	0.71	-0.99	0.32	0.6
SCAI	2.1	0.036	0.35	-0.58	0.56	0.97	1.18	0.24	0.52
ID4	2.1	0.036	0.34	1.81	0.071	0.78	-2.75	0.0061	0.071
ZKSCAN4	2.1	0.036	0.35	-0.12	0.9	1	0.21	0.83	0.93
C1orf146	-2.11	0.036	0.34	-0.79	0.43	0.94	0.33	0.74	0.89
PTCHD4	-2.11	0.036	0.34	-0.66	0.51	0.96	0.18	0.86	0.94
PCBP1	2.11	0.036	0.34	-0.44	0.66	0.98	1.78	0.076	0.29
SARAF	2.11	0.036	0.34	-0.14	0.89	1	-0.94	0.35	0.62
GPR88	2.1	0.036	0.34	1.38	0.17	0.86	-3.05	0.0024	0.042
PCDH10	2.1	0.036	0.35	-0.48	0.63	0.98	2.07	0.039	0.2
PTPRR	2.1	0.036	0.35	-1.25	0.21	0.88	-1.02	0.31	0.59
BAX	2.1	0.036	0.34	2.03	0.043	0.73	0.05	0.96	0.98
TLNRD1	-2.11	0.036	0.34	-1.08	0.28	0.9	3.08	0.0023	0.041
CDCP1	-2.1	0.036	0.34	0.69	0.49	0.96	2.16	0.031	0.17
NCF1	2.1	0.036	0.34	0.29	0.77	0.99	-1.04	0.3	0.58
ZMYM2	2.1	0.036	0.35	-1.98	0.049	0.73	0.02	0.98	0.99
OR2C3	-2.1	0.036	0.35	-0.09	0.93	1	0.25	0.81	0.92
HIST1H2AI	2.1	0.036	0.35	0.98	0.33	0.92	-4.41	1.3e-05	0.0016
TMEM257	2.11	0.036	0.34	-1.1	0.27	0.9	0.25	0.8	0.92
SLC4A7	2.11	0.036	0.34	1.61	0.11	0.82	-1.41	0.16	0.42
KLRG1	-2.09	0.037	0.35	1.77	0.077	0.8	-2.76	0.0059	0.07
SEMA6B	-2.09	0.037	0.35	-0.5	0.62	0.97	-1.04	0.3	0.58
LIAS	2.09	0.037	0.35	0.6	0.55	0.97	-1.13	0.26	0.54
GPR182	2.09	0.037	0.35	0.35	0.72	0.98	-3.28	0.0011	0.027
CSTL1	2.09	0.037	0.35	-0.41	0.68	0.98	-1.28	0.2	0.48
NLRP1	2.1	0.037	0.35	-0.96	0.34	0.92	-0.46	0.65	0.84
NR5A1	-2.09	0.037	0.35	1.49	0.14	0.84	0.83	0.41	0.67
TAS2R31	-2.09	0.037	0.35	0.23	0.82	0.99	-0.18	0.85	0.94
ZBTB8OS	2.09	0.037	0.35	1.4	0.16	0.86	-2.04	0.042	0.21
ITPA	-2.09	0.037	0.35	2.07	0.039	0.71	0.49	0.63	0.82
IDNK	2.1	0.037	0.35	0.1	0.92	1	-0.65	0.52	0.76
MYT1	-2.09	0.037	0.35	0.62	0.53	0.97	-2.24	0.026	0.16
C1orf56	-2.09	0.037	0.35	-0.04	0.97	1	-0.1	0.92	0.97
FAR2	-2.1	0.037	0.35	0.44	0.66	0.98	0.31	0.76	0.9
ITFG2	-2.09	0.037	0.35	-2.12	0.035	0.69	1.92	0.056	0.24
PRKG1	-2.09	0.037	0.35	-0.89	0.37	0.93	-0.95	0.34	0.62
PCDHA11	-2.09	0.037	0.35	-0.01	0.99	1	-0.29	0.77	0.91
TMPRSS4	-2.09	0.037	0.35	0.3	0.76	0.99	0.49	0.62	0.82
ADGRB3	2.09	0.037	0.35	2.32	0.02	0.63	-3.42	0.00066	0.02
UGT2B10	2.09	0.037	0.35	1.14	0.25	0.89	-1.9	0.058	0.25
CA5A	-2.09	0.037	0.35	0.25	0.81	0.99	0.61	0.54	0.77
SYN3	2.09	0.037	0.35	0.92	0.36	0.93	-0.79	0.43	0.69
FZD4	-2.09	0.037	0.35	0.91	0.36	0.93	0.09	0.93	0.97
MAF1	-2.09	0.037	0.35	-0.41	0.68	0.98	1.56	0.12	0.37
CFL2	2.08	0.038	0.35	0.93	0.35	0.93	-1.25	0.21	0.49
LOC107986988	2.08	0.038	0.35	1.47	0.14	0.85	0.81	0.42	0.68
CCR9	2.07	0.038	0.35	0.46	0.65	0.98	-0.53	0.6	0.81
PRDM7	2.08	0.038	0.35	-0.81	0.42	0.94	0.72	0.47	0.72
BATF2	2.08	0.038	0.35	0.99	0.32	0.92	4.03	6.3e-05	0.0045
CSK	-2.08	0.038	0.35	-0.06	0.95	1	2.25	0.025	0.15
ATP10B	-2.09	0.038	0.35	1.4	0.16	0.86	-1.14	0.25	0.53
CUX2	2.08	0.038	0.35	-2.23	0.026	0.66	-1.04	0.3	0.58
SKIV2L2	-2.08	0.038	0.35	0.04	0.96	1	1.13	0.26	0.54
GAS2L2	-2.08	0.038	0.35	-0.45	0.65	0.98	0.39	0.7	0.87
ALOX15B	-2.08	0.038	0.35	-0.15	0.88	1	-1.99	0.047	0.22
LRRIQ4	2.09	0.038	0.35	0.08	0.94	1	0.25	0.81	0.92
ITGB5	2.08	0.038	0.35	-1.17	0.24	0.89	-2.17	0.03	0.17
MEP1A	-2.08	0.038	0.35	0.41	0.68	0.98	-1.31	0.19	0.46
MT1G	2.08	0.038	0.35	1.63	0.1	0.82	-4.91	1.6e-06	0.00036
TAS2R7	-2.08	0.038	0.35	-1.52	0.13	0.83	0.85	0.4	0.67
MOV10L1	-2.08	0.038	0.35	-1.02	0.31	0.91	-0.31	0.76	0.9
ZNF839	2.09	0.038	0.35	-0.09	0.93	1	-2.28	0.023	0.15
PSEN2	2.08	0.038	0.35	-1.24	0.21	0.88	-0.44	0.66	0.85
CACHD1	-2.09	0.038	0.35	-0.7	0.48	0.95	-0.86	0.39	0.66
RPS14	-2.08	0.038	0.35	-2.01	0.045	0.73	0.38	0.71	0.87
SCN4B	2.08	0.038	0.35	-1.1	0.27	0.9	-0.08	0.94	0.97
TGFA	-2.08	0.038	0.35	1.15	0.25	0.89	0.36	0.72	0.88
UBE2G2	-2.08	0.038	0.35	-1.44	0.15	0.85	0.9	0.37	0.64
BHLHE41	-2.08	0.038	0.35	-0.59	0.56	0.97	-0.82	0.41	0.68
NCOA3	-2.08	0.038	0.35	-0.73	0.47	0.95	2.64	0.0084	0.085
OTULIN	-2.09	0.038	0.35	-0.94	0.35	0.93	0.84	0.4	0.67
FAAP24	-2.09	0.038	0.35	-0.57	0.57	0.97	2.11	0.036	0.19
ARMCX2	2.09	0.038	0.35	1.48	0.14	0.84	-2.32	0.021	0.14
TSFM	-2.06	0.039	0.36	-0.04	0.97	1	-1.26	0.21	0.48
UBE2E3	-2.07	0.039	0.36	-0.78	0.43	0.94	-0.46	0.65	0.84
DDX17	2.06	0.039	0.36	-0.78	0.43	0.94	-0.6	0.55	0.78
CHGB	-2.07	0.039	0.36	-0.29	0.77	0.99	2.1	0.036	0.19
PAQR4	2.07	0.039	0.36	-0.12	0.91	1	-3.59	0.00036	0.014
GSX2	-2.07	0.039	0.36	0.73	0.46	0.95	0.86	0.39	0.66
AMZ2P1	2.06	0.039	0.36	0.8	0.42	0.94	-1.75	0.081	0.3
ENO2	2.07	0.039	0.36	0.7	0.49	0.95	3.12	0.0019	0.037
FAM200A	-2.07	0.039	0.36	0.1	0.92	1	-0.97	0.33	0.61
DPY19L2	-2.08	0.039	0.36	-1.48	0.14	0.85	3.73	0.00023	0.011
KRTAP10-6	2.07	0.039	0.36	-0.81	0.42	0.94	-0.14	0.89	0.96
ASL	-2.07	0.039	0.36	1.44	0.15	0.85	0.24	0.81	0.92
MSH2	2.07	0.039	0.36	2.26	0.024	0.66	-5.29	1.7e-07	7.3e-05
MTTP	-2.07	0.039	0.36	-0.78	0.44	0.94	0.24	0.81	0.92
OGDH	2.07	0.039	0.36	-0.69	0.49	0.96	2.06	0.04	0.2
PLEKHA5	2.07	0.039	0.36	-0.77	0.44	0.94	-0.73	0.47	0.72
CYP26B1	2.06	0.039	0.36	0.02	0.98	1	0.49	0.62	0.82
PLXDC1	2.06	0.039	0.36	-1.02	0.31	0.91	-1.21	0.22	0.5
EDA2R	2.07	0.039	0.36	2.01	0.045	0.73	-3.3	0.0011	0.026
PRAMEF36P&PRAMEF34P	2.07	0.039	0.36	0.16	0.87	1	-1.03	0.31	0.59
TRIM48	-2.07	0.039	0.36	-1.01	0.31	0.91	1.75	0.08	0.3
LOC100509620	2.06	0.04	0.36	0.77	0.44	0.94	-1.84	0.067	0.27
LOC100996401	2.06	0.04	0.36	0.51	0.61	0.97	-0.34	0.73	0.88
ZNF256	2.06	0.04	0.36	-0.5	0.62	0.97	-2.53	0.012	0.1
SLC25A17	2.06	0.04	0.36	0.23	0.82	0.99	-1.27	0.21	0.48
CPD	-2.05	0.04	0.36	-1.45	0.15	0.85	1.94	0.053	0.23
CLDN7	2.06	0.04	0.36	0.52	0.6	0.97	-1.87	0.063	0.26
SLC39A12	2.06	0.04	0.36	-0.01	1	1	-1.73	0.084	0.3
GOLGA8A&GOLGA8B	-2.06	0.04	0.36	-0.46	0.65	0.98	1.54	0.12	0.38
MRPS27	-2.07	0.04	0.36	-0.44	0.66	0.98	1.1	0.27	0.55
TBC1D12	-2.06	0.04	0.36	-2.41	0.016	0.63	-1.25	0.21	0.49
MGRN1	-2.06	0.04	0.36	-0.68	0.5	0.96	-1.17	0.24	0.52
APOBEC3C	-2.06	0.04	0.36	-0.69	0.49	0.95	2.25	0.025	0.15
NPBWR1	-2.06	0.04	0.36	0.44	0.66	0.98	-2.46	0.014	0.11
CDIP1	-2.06	0.04	0.36	1.78	0.076	0.8	1.56	0.12	0.37
MAT2A	2.05	0.04	0.36	1.76	0.08	0.8	-2.55	0.011	0.099
MYBL2	-2.05	0.04	0.36	-1.35	0.18	0.86	-1.45	0.15	0.41
NMB	2.07	0.04	0.36	0.93	0.35	0.93	0.71	0.48	0.73
RSRC1	2.06	0.04	0.36	1.44	0.15	0.85	-2.05	0.041	0.2
PLXNA3	-2.06	0.04	0.36	-1.23	0.22	0.88	-0.04	0.97	0.99
PRKD1	2.06	0.04	0.36	-0.5	0.61	0.97	-3.17	0.0016	0.033
TEX11	2.07	0.04	0.36	-1.68	0.093	0.81	-1.66	0.098	0.33
BCCIP	2.06	0.04	0.36	-2	0.046	0.73	5.35	1.3e-07	6.8e-05
PSMB2	2.06	0.04	0.36	-0.62	0.53	0.97	-3.04	0.0025	0.043
BTF3	2.06	0.04	0.36	1.1	0.27	0.9	2.31	0.021	0.14
GTF2H2C&GTF2H2C_2	2.05	0.04	0.36	-0.23	0.81	0.99	-0.76	0.45	0.71
ZNF436	-2.06	0.04	0.36	-0.59	0.56	0.97	0.96	0.34	0.61
HIST1H4K&HIST1H4J	-2.06	0.04	0.36	0.33	0.75	0.99	2.08	0.038	0.2
ADAM20	2.06	0.04	0.36	-0.01	0.99	1	0.89	0.37	0.65
MYL10	-2.06	0.04	0.36	0.32	0.75	0.99	0.2	0.84	0.94
ABCC4	2.05	0.041	0.36	0.49	0.62	0.97	1.43	0.15	0.42
LOC102723996	-2.05	0.041	0.36	0	1	1	1.76	0.078	0.29
CAP2	-2.05	0.041	0.36	-0.19	0.85	0.99	-0.39	0.7	0.87
CENPA	-2.04	0.041	0.36	-1.61	0.11	0.82	1.94	0.053	0.23
LOC107984054	-2.05	0.041	0.36	-1.52	0.13	0.83	3.3	0.001	0.026
NEU3	2.05	0.041	0.36	0.73	0.46	0.95	-1.06	0.29	0.57
UBE2J2	-2.05	0.041	0.36	0.1	0.92	1	3.38	0.00077	0.022
LYZL2	-2.05	0.041	0.36	-1.03	0.3	0.91	2.76	0.006	0.07
BPIFA2	-2.05	0.041	0.36	-0.65	0.52	0.96	2.46	0.015	0.12
APOBEC3F	-2.05	0.041	0.36	0.85	0.4	0.94	-1.73	0.084	0.3
APPL1	2.05	0.041	0.36	-0.59	0.55	0.97	-2.47	0.014	0.11
WIPI2	-2.05	0.041	0.36	-0.03	0.98	1	0.69	0.49	0.74
ANKRD1	-2.05	0.041	0.36	-1.19	0.24	0.89	2.04	0.043	0.21
GRM2	-2.05	0.041	0.36	-1.09	0.28	0.9	-0.08	0.94	0.98
GTF2E2	-2.05	0.041	0.36	0	1	1	2.7	0.0071	0.077
GUCY1A2	-2.05	0.041	0.36	-0.07	0.94	1	1.52	0.13	0.38
NDUFA4	2.05	0.041	0.36	0.68	0.5	0.96	-1.28	0.2	0.48
PLEKHA8P1	2.06	0.041	0.36	-0.1	0.92	1	-2.72	0.007	0.076
PDE1C	2.05	0.041	0.36	-1.39	0.16	0.86	-2.82	0.005	0.064
ERGIC3	-2.06	0.041	0.36	-1.82	0.071	0.78	2.46	0.014	0.11
ADAM22	2.05	0.041	0.36	0.28	0.78	0.99	-1.81	0.07	0.28
C21orf91	-2.05	0.041	0.36	0.16	0.87	1	1.69	0.092	0.32
USP53	2.05	0.041	0.36	-0.69	0.49	0.96	-3.4	0.00074	0.021
VCAM1	2.05	0.041	0.36	0.66	0.51	0.96	0.74	0.46	0.72
VIL1	2.05	0.041	0.36	-0.28	0.78	0.99	-1.55	0.12	0.37
VEZF1	-2.05	0.041	0.36	-1.24	0.22	0.88	-0.72	0.47	0.72
TXNDC15	-2.05	0.041	0.36	-0.54	0.59	0.97	2.56	0.011	0.097
NLRC5	-2.05	0.041	0.36	1.17	0.24	0.89	0.85	0.4	0.67
ZNF282	-2.05	0.041	0.36	-0.59	0.55	0.97	0.64	0.53	0.76
TRIM47	2.05	0.041	0.36	-1.69	0.091	0.81	1.52	0.13	0.38
PIEZO1	-2.05	0.041	0.36	-0.16	0.87	1	0.73	0.47	0.72
MFAP3L	2.05	0.041	0.36	-0.52	0.6	0.97	-1.64	0.1	0.34
ACOT8	-2.04	0.042	0.37	-1.08	0.28	0.9	0.67	0.51	0.75
RBCK1	2.04	0.042	0.37	1.29	0.2	0.87	-3.83	0.00014	0.0075
METAP2	2.04	0.042	0.37	-2.03	0.042	0.73	3.31	0.00099	0.025
FAM186A	2.04	0.042	0.37	-0.3	0.77	0.99	0.91	0.36	0.64
AK7	2.04	0.042	0.37	-0.06	0.96	1	-1.16	0.25	0.53
CNTNAP5	-2.04	0.042	0.37	-1.14	0.26	0.89	2.71	0.0071	0.077
COL12A1	-2.04	0.042	0.37	-0.11	0.91	1	0.9	0.37	0.64
CCDC27	2.05	0.042	0.37	-0.92	0.36	0.93	-2.1	0.037	0.19
CRYGN	-2.04	0.042	0.37	-0.09	0.93	1	2.33	0.02	0.14
C8orf37	-2.04	0.042	0.37	1.73	0.085	0.8	0.56	0.58	0.8
ZNF638	2.03	0.042	0.37	0.95	0.34	0.92	-1.03	0.31	0.59
OR2M2	-2.04	0.042	0.37	-0.81	0.42	0.94	-0.81	0.42	0.68
MET	2.03	0.042	0.37	1.47	0.14	0.85	-2.92	0.0037	0.054
NELL1	2.04	0.042	0.37	0.72	0.47	0.95	-2.62	0.0091	0.088
NFKB2	2.04	0.042	0.37	-1.29	0.2	0.87	0.39	0.7	0.87
NUCB1	2.04	0.042	0.37	1.02	0.31	0.91	-1.09	0.28	0.56
NOX3	-2.04	0.042	0.37	-0.14	0.89	1	-0.25	0.8	0.92
COPZ2	-2.04	0.042	0.37	-0.45	0.65	0.98	2.23	0.026	0.16
PLAT	2.04	0.042	0.37	1.32	0.19	0.87	-1.29	0.2	0.47
EPDR1	2.04	0.042	0.37	-0.48	0.63	0.98	-1.66	0.097	0.33
PSMD10	-2.04	0.042	0.37	-0.54	0.59	0.97	-0.82	0.42	0.68
ZNF608	-2.04	0.042	0.37	-1.2	0.23	0.88	1.93	0.054	0.24
YWHAH	2.03	0.042	0.37	-0.71	0.48	0.95	-2.16	0.032	0.18
ZNF141	2.04	0.042	0.37	0.73	0.47	0.95	0.52	0.6	0.81
ZNF232	2.04	0.042	0.37	0.42	0.68	0.98	-4.1	4.7e-05	0.0038
GLB1L	-2.04	0.042	0.37	-1.31	0.19	0.87	0.68	0.5	0.74
CCDC92	2.04	0.042	0.37	0.12	0.91	1	-1.87	0.063	0.26
SEMA7A	-2.04	0.042	0.37	-1.65	0.099	0.81	0.99	0.32	0.6
ABCC3	2.04	0.042	0.37	1.23	0.22	0.88	-4.73	2.7e-06	0.00051
SEC11C	-2.04	0.042	0.37	2.23	0.026	0.66	0.51	0.61	0.82
CD2	2.03	0.042	0.37	1.46	0.14	0.85	0	1	1
MGAM2	2.04	0.042	0.37	0.55	0.58	0.97	-1.05	0.29	0.57
TRMT10A	2.04	0.042	0.37	-0.39	0.7	0.98	1.17	0.24	0.52
ARMCX5-GPRASP2	-2.03	0.043	0.37	1.27	0.2	0.88	0.03	0.97	0.99
ABRA	-2.03	0.043	0.37	-0.93	0.35	0.93	2.18	0.029	0.17
COMMD1	-2.03	0.043	0.37	0.07	0.95	1	1.99	0.047	0.22
ECHS1	-2.03	0.043	0.37	-1.36	0.17	0.86	1.77	0.077	0.29
FDFT1	2.03	0.043	0.37	1.71	0.087	0.8	-2.61	0.0093	0.089
FTSJ1	-2.03	0.043	0.37	1.16	0.25	0.89	1.98	0.048	0.22
ZDHHC22	2.04	0.043	0.37	0.24	0.81	0.99	0.77	0.44	0.7
HOXB5	2.03	0.043	0.37	0.31	0.75	0.99	-1.99	0.047	0.22
[truncated: 15,311 more rows]

## Sheet: S7
Table S7. Differential therapeutic sensitivity from CCLE data
Compound (code or generic name)	Target(s)	Mechanism of action	comutant_t	comutant_pv	comutant_padj	TP53_t	TP53_pv	TP53_padj	RB1_t	RB1_pv	RB1_padj
Panobinostat	HDAC	Histone Deacetylase (HDAC) Inhibitor	-2.03	0.043	0.33	-0.09	0.93	0.97	2.05	0.041	0.11
LBW242	IAP	Inhibitor of Apoptosis Proteins (IAP) Inhibitor	-1.96	0.051	0.33	1.53	0.13	0.91	0.11	0.91	0.95
PHA-665752	c-MET	c-MET Inhibitor	-1.93	0.055	0.33	1.72	0.087	0.91	1.1	0.27	0.43
L-685458	Gamma Secretase	gamma-Secretase Inhibitor	-1.7	0.09	0.37	0.6	0.55	0.91	2.28	0.023	0.085
TKI258	EGFR, FGFR1, PDGFRbeta, VEGFR-1, KDR	Multi-kinase inhibitor	-1.62	0.11	0.37	-0.31	0.76	0.91	2.25	0.025	0.085
Topotecan	Topoisomerase I	DNA Topoisomerase I Inhibitor	-1.61	0.11	0.37	0.18	0.86	0.93	1.85	0.064	0.14
Paclitaxel	beta-tubulin	Microtubule-Stabilizing Agents	-1.5	0.13	0.4	1.53	0.13	0.91	-0.23	0.82	0.94
Sorafenib	Flt3, C-KIT, PDGFRbeta, RET, Raf kinase B, Raf kinase C, VEGFR-1, KDR, FLT4	Multi-kinase inhibitor	-1.41	0.16	0.42	0.22	0.83	0.93	1.82	0.069	0.14
TAE684	ALK	ALK Inhibitor	-1.36	0.18	0.42	-0.99	0.32	0.91	2.11	0.035	0.11
Erlotinib	EGFR	EGFR Inhibitor	-1.1	0.27	0.59	1.19	0.23	0.91	1.45	0.15	0.27
PF2341066	c-MET, ALK	c-MET and ALK Inhibitor	-0.93	0.35	0.65	0.03	0.97	0.97	1.24	0.22	0.37
AZD0530	Src, Abl/Bcr-Abl, EGFR	Src and Abl inhibitor	-0.74	0.46	0.74	0.78	0.44	0.91	0.17	0.87	0.95
17-AAG	HSP90	Heat Shock Protein 90 (hsp90) Inhibitor	-0.71	0.48	0.74	0.37	0.71	0.91	3.82	0.00015	0.0028
Vandetanib	Abl, EGFR, Flt3, C-KIT, RET, VEGFR-1, KDR, FLT4	Multi-kinase inhibitor	-0.68	0.5	0.74	0.9	0.37	0.91	0.86	0.39	0.55
RAF265	Raf kinase B, KDR	Raf kinase B and KDR Inhibitor	-0.42	0.67	0.92	-0.32	0.75	0.91	2.01	0.046	0.11
PLX4720	RAF	Raf kinase B Inhibitor	-0.12	0.91	0.93	0.87	0.38	0.91	2.46	0.014	0.068
AEW541	IGF-1R	IGF-1R Inhibitor	-0.08	0.93	0.93	-0.31	0.76	0.91	0.89	0.37	0.55
Irinotecan	Topoisomerase I	DNA Topoisomerase I Inhibitor	0.16	0.88	0.93	0.54	0.59	0.91	0.24	0.81	0.94
Nilotinib	Abl/Bcr-Abl	Abl Inhibitor	0.25	0.8	0.92	-0.41	0.68	0.91	0.28	0.78	0.94
AZD6244	MEK	MEK1 and MEK2 Inhibitor	0.28	0.78	0.92	1.09	0.28	0.91	3.52	0.00048	0.0038
PD-0325901	MEK	MEK1 and MEK2 Inhibitor	0.3	0.77	0.92	0.46	0.64	0.91	3.71	0.00023	0.0028
Nutlin-3	MDM2	MDM2 Inhibitor	0.34	0.74	0.92	0.74	0.46	0.91	3.32	0.00098	0.0059
Lapatinib	EGFR, HER2	EGFR and HER2 Inhibitor	0.99	0.32	0.65	0.69	0.49	0.91	-0.56	0.57	0.77
PD-0332991	CDK4/6	CDK4/6 Inhibitor	2.43	0.016	0.33	0.75	0.46	0.91	0.04	0.97	0.97

## Sheet: S8
Table S8. Differential therapeutic sensitivity from CTRP data
cpd_name	target_or_activity_of_compound	gene_symbol_of_protein_target	comutant_t	comutant_pv	comutant_padj	TP53_t	TP53_pv	TP53_padj	RB1_t	RB1_pv	RB1_padj
MK-1775	inhibitor of WEE1	WEE1	-4.76	2.4e-06	0.0013	-0.29	0.77	0.92	2.26	0.024	0.1
BIX-01294	inhibitor of G9a histone methyltransferase	EHMT2	-4.59	5.2e-06	0.0014	-2.42	0.016	0.26	4.13	4.1e-05	0.0013
cucurbitacin I	natural product; modulator of NFKB1 and STAT3 signaling		-4.02	6.5e-05	0.012	-1.3	0.19	0.57	4.16	3.6e-05	0.0013
paclitaxel	inhibitor of microtubule assembly		-3.89	0.00011	0.015	-1.09	0.28	0.64	1.45	0.15	0.34
CD-437	agonist of retinoic acid receptor gamma	RARG	-3.77	0.00017	0.019	-1.51	0.13	0.49	3.03	0.0025	0.021
NSC19630	inhibitor of Werner syndrome helicase activity	WRN	-3.56	0.00041	0.037	-1.31	0.19	0.57	2.58	0.01	0.053
leptomycin B	inhibitor of exportin 1	XPO1	-3.33	0.0009	0.07	-1.05	0.3	0.66	3.35	0.00084	0.0099
docetaxel:tanespimycin (2:1 mol/mol)	inhibitor of microtubule assembly;inhibitor of HSP90	HSP90AA1	-3.22	0.0013	0.078	-1.42	0.15	0.52	2.62	0.0091	0.049
UNC0638:navitoclax (1:1 mol/mol)	inhibitor of EHMT2 and GLP methyltransferase;inhibitor of BCL2, BCL-xL, and BCL-W	EHMT1;EHMT2;BCL2;BCL2L1;BCL2L2	-3.18	0.0015	0.078	-1.5	0.13	0.49	4.75	2.5e-06	0.00015
KH-CB19	inhibitor of CDC2-like kinases 1 and 4	CLK1;CLK4	-3.18	0.0016	0.078	0.49	0.62	0.85	1.45	0.15	0.34
triazolothiadiazine	inhibitor of phosphdiesterase 4A/B/D	PDE4A;PDE4B;PDE4D	-3.16	0.0016	0.078	-0.87	0.39	0.72	1.49	0.14	0.33
topotecan	inhibitor of topoisomerase I	TOP1	-3.12	0.0019	0.078	-3.09	0.002	0.14	4.05	5.7e-05	0.0015
vincristine	inhibitor of mictrotubule assembly		-3.12	0.0019	0.078	-1.11	0.27	0.64	2.25	0.025	0.1
ciclopirox	substituted pyridone antimycotic; inhibitor of the iron-dependent enzyme ribonucleotide reductase	RRM1	-3.1	0.002	0.078	-2.81	0.005	0.18	4.59	5.3e-06	0.00024
SN-38	metabolite of irinotecan; inhibitor of topoisomerase I	TOP1	-3.07	0.0022	0.078	-1.36	0.17	0.55	3.78	0.00017	0.0032
ciclosporin	inhibitor of calcineurin by binding to cyclophilin D	PPID	-3.05	0.0024	0.078	1.19	0.23	0.62	0.13	0.9	0.94
purmorphamine	activator of smoothened receptor	SMO	-3.04	0.0024	0.078	0.78	0.44	0.76	0.99	0.32	0.56
YK 4-279	inhibitor of RNA helicase A (RHA) binding to EWS-FLI1; inhibitor of ERG and ETV1 activity	DHX9;ERG;ETV1	-2.99	0.0028	0.086	-0.97	0.33	0.67	2.37	0.018	0.084
parthenolide	natural product; modulator of ROS; modulator of NF-kappa-B signaling		-2.89	0.0039	0.11	-1.22	0.22	0.61	2.26	0.024	0.1
BRD-K13999467	product of diversity oriented synthesis		-2.85	0.0045	0.12	0.74	0.46	0.77	1.37	0.17	0.36
navitoclax:birinapant (1:1 mol/mol)	inhibitor of BCL2, BCL-xL, and BCL-W;SMAC mimetic; inhibitor of inhibitor of apoptosis proteins (IAPs)	BCL2;BCL2L1;BCL2L2;DIABLO;XIAP	-2.83	0.0048	0.12	-0.72	0.47	0.78	3.13	0.0018	0.016
ceranib-2	inhibitor of ceramidase activity	ACER1;ACER2;ACER3;ASAH1;ASAH2;ASAH2B	-2.82	0.0049	0.12	-0.64	0.52	0.8	0.84	0.4	0.64
isoevodiamine	natural product		-2.79	0.0054	0.13	-0.73	0.47	0.77	1.97	0.049	0.17
3-Cl-AHPC	binder of nuclear receptor SHP	NR0B2	-2.78	0.0056	0.13	-0.36	0.72	0.88	2.7	0.0071	0.042
BRD-K51490254	inhibitor of HDAC6 and HDAC8	HDAC6;HDAC8	-2.72	0.0066	0.14	-1.55	0.12	0.49	2.63	0.0087	0.048
BRD-K37390332	product of diversity oriented synthesis		-2.68	0.0076	0.16	0.2	0.84	0.96	1.26	0.21	0.41
BRD-K27188169:navitoclax (2:1 mol/mol)	stapled helical peptide;inhibitor of BCL2, BCL-xL, and BCL-W	BCL2;BCL2L1;BCL2L2	-2.67	0.008	0.16	-1.15	0.25	0.63	2.83	0.0049	0.034
mitomycin	DNA crosslinker		-2.64	0.0084	0.16	-1.96	0.05	0.36	5.13	3.7e-07	2.9e-05
SZ4TA2	inhibitor of BCL-xL	BCL2L1	-2.64	0.0086	0.16	0.11	0.91	0.97	2.58	0.01	0.053
OSI-930	inhibitor of c-KIT and VEGFR2	KDR;KIT	-2.63	0.0087	0.16	-1.87	0.062	0.38	2.74	0.0063	0.04
UNC0638	inhibitor of EHMT2 and GLP methyltransferase	EHMT1;EHMT2	-2.6	0.0094	0.16	-1.14	0.25	0.63	3.66	0.00027	0.0042
CR-1-31B	silvestrol analog; inhibits translation by modulating the eIF4F complex	EIF4A2;EIF4E;EIF4G1	-2.6	0.0095	0.16	-1.43	0.15	0.52	1.62	0.11	0.27
cerulenin	inhibitor of fatty acid synthase; inhibitor of HMG-CoA synthase	FASN;HMGCS1	-2.59	0.0097	0.16	-2.11	0.035	0.36	2.44	0.015	0.072
SMER-3	inhibitor of E3-ubiquitin ligase	CUL1;SKP1	-2.58	0.01	0.16	-0.71	0.48	0.78	0.38	0.71	0.84
KPT185	inhibitor of exportin 1	XPO1	-2.55	0.011	0.17	-2.46	0.014	0.26	3.88	0.00012	0.0025
PX-12	inhibitor of thioredoxin-1	TXN	-2.54	0.011	0.17	-1.4	0.16	0.53	2.09	0.037	0.14
entinostat	inhibitor of HDAC1, HDAC2, HDAC3, HDAC6, and HDAC8	HDAC1;HDAC2;HDAC3;HDAC6;HDAC8	-2.51	0.012	0.18	-2.65	0.0081	0.2	3.33	0.00091	0.01
Compound 7d-cis	inhibitor of CRM1-mediated nucleocytoplasmic transport	XPO1	-2.49	0.013	0.18	-1.6	0.11	0.49	2.58	0.01	0.053
ML239	ML239; inhibitor of breast cancer stem cell proliferation		-2.49	0.013	0.18	-1.69	0.092	0.47	0.04	0.97	0.98
PYR-41	inhibitor of ubiquitin-activating enzyme in cells	UBA1	-2.48	0.013	0.18	-1.05	0.29	0.66	1.91	0.057	0.18
BI-2536	inhibitor of polo-like kinase 1 (PLK1)	PLK1	-2.47	0.014	0.18	-0.57	0.57	0.83	0.5	0.62	0.79
ML031	inhibitor of sphingosine 1-phosphate receptor 2	S1PR2	-2.47	0.014	0.18	0.09	0.93	0.97	0.83	0.4	0.64
ML050	antagonist of GPR30	GPER1	-2.46	0.014	0.18	-2.1	0.036	0.36	2.05	0.04	0.15
BRD-K03911514	stapled helical peptide		-2.45	0.015	0.18	-0.04	0.97	0.98	0.96	0.34	0.58
docetaxel	inhibitor of microtubule assembly		-2.45	0.015	0.18	0.36	0.72	0.88	1.24	0.22	0.42
piperlongumine	natural product; modulator of ROS levels		-2.44	0.015	0.18	-2.64	0.0084	0.2	3.7	0.00023	0.0039
SB-225002	inhibitor of chemokine receptor 2	CXCR2	-2.4	0.016	0.18	-1.7	0.09	0.47	1.7	0.089	0.25
SNX-2112:bortezomib (250:1 mol/mol)	inhibitor of HSP90alpha and HSP90beta;inhibitor of 26S proteasome	HSP90AA1;HSP90B1;PSMB1;PSMB2;PSMB5;PSMD1;PSMD2	-2.41	0.016	0.18	-1.03	0.3	0.66	3.5	0.0005	0.007
omacetaxine mepesuccinate	inhibitor of protein translation by preventing protein elongation		-2.43	0.016	0.18	-0.53	0.6	0.84	2.84	0.0047	0.033
BRD-K61166597	inhibitor of HDAC1 and HDAC2		-2.38	0.017	0.19	-0.7	0.48	0.78	2.81	0.0051	0.035
epigallocatechin-3-monogallate	natural product		-2.4	0.017	0.18	0.81	0.42	0.74	1.81	0.071	0.21
B02	inhibitor of RAD51	RAD51	-2.36	0.018	0.19	-1.42	0.16	0.52	0.55	0.59	0.76
SB-743921	inhibitor of kinesin 11	KIF11	-2.34	0.019	0.2	-0.63	0.53	0.8	0.76	0.44	0.66
SNS-032	inhibitor of cyclin-dependent kinases	CDK16;CDK17;CDK2;CDK7;CDK9;CDKL5	-2.33	0.02	0.2	0.73	0.46	0.77	2.76	0.006	0.039
16-beta-bromoandrosterone	dehydroepiandrosterone (DHEA) analog		-2.3	0.022	0.21	-0.52	0.6	0.84	2.53	0.012	0.059
ML203	activator of muscle pyruvate kinase (PKM2)	PKM	-2.29	0.022	0.21	-1.1	0.27	0.64	0.23	0.82	0.9
SR-II-138A	silvestrol analog; inhibits translation by modulating the eIF4F complex	EIF4A2;EIF4E;EIF4G1	-2.29	0.022	0.21	-1.7	0.09	0.47	2.13	0.033	0.13
NSC23766	inhibitor of RAC1-GEF interaction; prevents Rac1 activation by Rac-specific guanine nucleotide exchange factors (GEFs) TrioN and Tiam1	RAC1;TIAM1;TRIO	-2.28	0.023	0.21	-0.9	0.37	0.7	2.59	0.0099	0.052
YM-155	inhibitor of survivin expression	BIRC5	-2.28	0.023	0.21	0.87	0.38	0.72	0.13	0.9	0.94
manumycin A	inhibitor of RAS farnesyltransferase	FNTA;FNTB	-2.29	0.023	0.21	-1.34	0.18	0.56	1.14	0.26	0.47
BRD-K28456706	inhibitor of hepatocyte nuclear factor 4 alpha	HNF4A	-2.26	0.024	0.22	-1.95	0.052	0.36	3	0.0028	0.023
fingolimod	inhibitor of sphingosine 1-phosphate receptor	S1PR1	-2.25	0.025	0.22	-1.95	0.051	0.36	2.85	0.0045	0.032
ML162	selectively kills engineered cells expressing mutant HRAS		-2.23	0.026	0.22	-1.63	0.1	0.49	0.77	0.44	0.66
elocalcitol	agonist of vitamin D receptor	VDR	2.24	0.026	0.22	-0.55	0.58	0.83	-0.22	0.83	0.91
tretinoin:navitoclax (4:1 mol/mol)	agonist of retinoid acid receptors;inhibitor of BCL2, BCL-xL, and BCL-W	RARA;RARB;RARG;BCL2;BCL2L1;BCL2L2	-2.24	0.026	0.22	-1.51	0.13	0.49	4.29	2e-05	0.00078
BRD-K85133207	inhibitor of HDAC1	HDAC1	-2.21	0.027	0.22	-1.14	0.25	0.63	3.29	0.0011	0.011
CBB-1007	inhibitor of lysine-specific demethylase 1A (LSD1)	KDM1A	-2.21	0.027	0.22	-1.19	0.23	0.62	2.17	0.031	0.12
JQ-1:UNC0638 (2:1 mol/mol)	inhibitor of bromodomain (BRD) and extra-C terminal domain (BET) proteins;inhibitor of EHMT2 and GLP methyltransferase	BRDT;EHMT1;EHMT2	-2.21	0.027	0.22	-0.99	0.32	0.67	2.64	0.0085	0.047
avicin D	natural product		2.22	0.027	0.22	-0.99	0.32	0.67	-1.63	0.1	0.27
MI-2	binder of menin; inhibitor of menin-MLL fusion protein	MEN1	-2.2	0.028	0.22	-1.99	0.047	0.36	3.33	0.00094	0.01
necrosulfonamide	inhibitor of downstream signaling of RIP3 associated with MLKL		-2.18	0.029	0.23	-1.25	0.21	0.59	1.73	0.084	0.24
BCL-LZH-4	inhibitor of BCL2, BCL-xL, and MCL1		2.16	0.031	0.24	-0.14	0.88	0.97	-2.3	0.022	0.094
DBeQ	inhibitor of p97 in cells	VCP	-2.14	0.033	0.24	0.17	0.86	0.96	-0.62	0.54	0.73
RO4929097	inhibitor of gamma-secretase	APH1A;NCSTN;PSEN1;PSENEN	-2.14	0.033	0.24	-3.06	0.0024	0.14	3.72	0.00023	0.0039
SJ-172550	inhibitor of p53-MDM2 interaction	MDM2;TP53	2.12	0.034	0.24	0.09	0.93	0.97	-1.6	0.11	0.28
BRD-K27188169	stapled helical peptide		-2.11	0.035	0.24	-0.65	0.52	0.8	1.44	0.15	0.34
ML083	activator of muscle pyruvate kinase	PKM	-2.11	0.035	0.24	-0.11	0.91	0.97	1.4	0.16	0.35
doxorubicin:navitoclax (2:1 mol/mol)	inhibitor of topoisomerase II;inhibitor of BCL2, BCL-xL, and BCL-W	TOP2A;BCL2;BCL2L1;BCL2L2	-2.12	0.035	0.24	-3.13	0.0018	0.14	5.97	3.6e-09	9.7e-07
BMS-270394	antagonist of retinoic acid receptor gamma	RARG	-2.11	0.036	0.24	-1.9	0.058	0.38	1.84	0.066	0.2
erlotinib	inhibitor of EGFR and HER2	EGFR;ERBB2	2.1	0.036	0.24	0.16	0.87	0.97	-0.03	0.98	0.99
neuronal differentiation inducer III	induction of rat HCN cell differentiation as judged by induction of neuronal reporter neuroD activity		-2.1	0.036	0.24	-0.88	0.38	0.72	2.3	0.022	0.093
BRD-K16130065	stapled helical peptide		2.1	0.037	0.24	-1.02	0.31	0.67	0.25	0.8	0.89
BRD-K94991378	inducer of ROS		-2.09	0.037	0.24	-2.16	0.031	0.36	1.32	0.19	0.38
PI-103	inhibitor of DNA-PK, PI3K p110 delta, mTORC1, and catalytic subunits of PI3K	MTOR;PIK3CA;PIK3CB;PIK3CD;PIK3CG;PRKDC	-2.09	0.037	0.24	-0.51	0.61	0.84	1.16	0.25	0.46
SRT-1720	activator of sirtuin-1	SIRT1	-2.06	0.04	0.25	-1.11	0.27	0.64	-0.09	0.93	0.96
tivantinib	inhibitor of MET; inhibitor of microtubule assembly	MET	-2.06	0.04	0.25	-1.82	0.07	0.41	1.54	0.12	0.31
ISOX:bortezomib (250:1 mol/mol)	inhibitor of HDAC6;inhibitor of 26S proteasome	HDAC6;PSMB1;PSMB2;PSMB5;PSMD1;PSMD2	-2.05	0.041	0.26	0.03	0.98	0.98	1.11	0.27	0.49
LY-2183240	inhibitor of fatty acid amide hydrolase; inhibitor of anandamide uptake	FAAH	-2.02	0.044	0.27	-1.25	0.21	0.59	0.64	0.52	0.72
BRD8899	inhibitor of serine/threonine kinasase STK33	STK33	-2.01	0.045	0.27	-0.1	0.92	0.97	-0.27	0.79	0.88
ELCPK	screening hit		-2.01	0.045	0.27	0.42	0.67	0.87	1.29	0.2	0.39
nutlin-3	inhibitor of p53-MDM2 interaction	MDM2	2	0.046	0.27	-3.34	0.00087	0.14	13.31	1.8e-36	9.7e-34
necrostatin-1	inhibitor of receptor-interacting protein kinase 1; inhibitor of the necroptosis cell death pathway	RIPK1	1.98	0.048	0.28	0.49	0.62	0.85	0.63	0.53	0.73
tanespimycin:gemcitabine (1:1 mol/mol)	inhibitor of HSP90;inhibitor of DNA replication; inhibitor of ribonucleotide reductase, thymidylate synthetase, and cytidine monophosphate (UMP-CMP) kinase	HSP90AA1;CMPK1;RRM1;TYMS	-1.98	0.048	0.28	-1.54	0.12	0.49	3.95	8.4e-05	0.002
piperlongumine:MST-312 (1:1 mol/mol)	natural product; modulator of ROS levels;inhibitor of telomerase reverse transcriptase	TERT	-1.98	0.049	0.28	-2.36	0.019	0.28	1.96	0.05	0.17
tandutinib	inhibitor of c-KIT and VEGFR3	FLT3;KIT	-1.96	0.05	0.29	-1.43	0.15	0.52	2.15	0.032	0.12
CIL56	screening hit		-1.96	0.051	0.29	-0.21	0.84	0.96	-0.31	0.76	0.87
necrostatin-7	inhibitor of necroptosis		-1.95	0.051	0.29	-0.69	0.49	0.79	0.76	0.45	0.66
carboplatin:UNC0638 (2:1 mol/mol)	inducer of DNA damage;inhibitor of EHMT2 and GLP methyltransferase	EHMT1;EHMT2	-1.93	0.054	0.3	-1.18	0.24	0.62	2.05	0.041	0.15
KU-55933	inhibitor of ataxia telangiectasia mutated (ATM)	ATM	-1.92	0.055	0.3	-0.46	0.64	0.86	1.86	0.063	0.2
VAF-347	inhibitor of aryl hydrocarbon receptor	AHR	1.92	0.055	0.3	-0.41	0.69	0.87	0.91	0.36	0.61
tretinoin:carboplatin (2:1 mol/mol)	agonist of retinoid acid receptors;inducer of DNA damage	RARA;RARB;RARG	-1.92	0.055	0.3	0.26	0.8	0.93	1.58	0.11	0.29
MK-0752	inhibitor of gamma-secretase	APH1A;NCSTN;PSEN1;PSENEN	-1.9	0.057	0.3	-1.71	0.087	0.47	2.02	0.044	0.16
bortezomib	inhibitor of 26S proteasome	PSMB1;PSMB2;PSMB5;PSMD1;PSMD2	-1.91	0.057	0.3	-0.65	0.52	0.8	-0.59	0.56	0.74
indisulam	inhibitor of carbonic anhydrase isoform IX	CA9	-1.89	0.06	0.31	-2.08	0.038	0.36	2.94	0.0034	0.027
AZD7762	inhibitor of checkpoint kinases 1 and 2	CHEK1;CHEK2	-1.85	0.064	0.33	1.53	0.13	0.49	-0.17	0.87	0.92
PF-3758309	inhibitor of serine/threonine p21-activating kinase 4	PAK4	-1.85	0.065	0.33	-1.37	0.17	0.55	4.75	2.8e-06	0.00015
NVP-231	inhibitor of ceramide kinase	CERK	-1.84	0.066	0.33	-0.07	0.94	0.97	1.88	0.061	0.19
dinaciclib	inhibitor of cyclin-dependent kinases	CDK1;CDK2;CDK5;CDK9	-1.84	0.067	0.33	-0.12	0.91	0.97	1.39	0.17	0.35
pluripotin	promoter of embryonic stem cell self-renewal; inhibitor of Ras-GAP and ERK	MAPK1;RASAL1	1.84	0.067	0.33	-0.55	0.58	0.83	0.66	0.51	0.72
BRD-A94377914	inhibitor of HDAC1, HDAC2, HDAC3, HDAC6, and HDAC8	HDAC1;HDAC2;HDAC3;HDAC6;HDAC8	-1.83	0.068	0.33	-0.48	0.63	0.85	1.78	0.076	0.22
IC-87114	inhibitor of PI3K catalytic subunit delta	PIK3CD	1.82	0.068	0.33	1.14	0.26	0.64	-0.64	0.52	0.72
BRD-K11533227	inhibitor of HDAC1 and HDAC2	HDAC1;HDAC2	-1.82	0.069	0.33	-1.85	0.064	0.38	3	0.0028	0.023
tanespimycin:bortezomib (250:1 mol/mol)	inhibitor of HSP90;inhibitor of 26S proteasome	HSP90AA1;PSMB1;PSMB2;PSMB5;PSMD1;PSMD2	-1.82	0.069	0.33	-0.1	0.92	0.97	3.28	0.0011	0.011
KU-60019	inhibitor of ataxia telangiectasia mutated (ATM)	ATM	-1.82	0.07	0.33	0.43	0.67	0.87	0.72	0.47	0.69
OSI-027	inhibitor of mTORC1 and mTORC2	MTOR	1.81	0.07	0.33	-0.75	0.45	0.77	0.68	0.5	0.71
austocystin D	natural product; inducer of DNA damage		-1.82	0.07	0.33	-0.65	0.52	0.8	1.53	0.13	0.31
procarbazine	inducer of DNA damage		1.82	0.07	0.33	1.66	0.098	0.49	-0.74	0.46	0.67
KX2-391	peptide mimetic; inhibitor of SRC activity in cells	SRC	-1.8	0.071	0.33	-0.5	0.61	0.84	0.73	0.46	0.68
parbendazole	inhibitor of microtubule assembly		-1.81	0.071	0.33	-1.3	0.19	0.57	1.26	0.21	0.4
XL765	inhibitor of mTOR and PI3K kinase acitivities	MTOR;PIK3CA;PIK3CB;PIK3CD;PIK3CG;PRKDC	-1.8	0.072	0.33	-1.36	0.17	0.55	1.57	0.12	0.29
axitinib	inhibitor of VEGFRs, c-KIT, and PDGFR alpha and beta	FLT1;FLT3;KDR;KIT;PDGFRA;PDGFRB	-1.8	0.073	0.33	-1.56	0.12	0.49	1.85	0.065	0.2
MST-312	inhibitor of telomerase reverse transcriptase	TERT	-1.79	0.075	0.33	-1.98	0.048	0.36	2.65	0.0082	0.047
sotrastaurin	inhibitor of protein kinase C beta	PRKCB	-1.78	0.076	0.34	-1.17	0.24	0.62	3.43	0.00065	0.0084
ML320	inhibitor of GSK3 beta	GSK3B	1.77	0.077	0.34	0.39	0.69	0.87	-0.78	0.44	0.66
PD318088	inhibitor of MEK1 and MEK2	MAP2K1;MAP2K2	1.77	0.077	0.34	-0.49	0.63	0.85	1.33	0.18	0.38
BRD-K13185470	stapled helical peptide targeting MCL1	MCL1	1.77	0.078	0.34	0.55	0.58	0.83	-0.18	0.86	0.92
thalidomide	immunomodulatory drug; binder of cereblon	CRBN	-1.77	0.078	0.34	-1.3	0.19	0.57	0.85	0.39	0.64
olaparib	inhibitor of poly (ADP-ribose) polymerase 1 and 2	PARP1;PARP2	-1.74	0.082	0.35	-1.18	0.24	0.62	4.77	2.2e-06	0.00015
BRD-K99584050	stapled helical peptide		1.74	0.083	0.35	0.14	0.89	0.97	-0.23	0.82	0.9
tamoxifen	modulator of estrogen receptors	ESR1;ESR2	1.73	0.083	0.35	-0.46	0.64	0.86	-0.17	0.87	0.92
daporinad	inhibitor of nicotinamide phosphoribosyltransferase	NAMPT	-1.72	0.086	0.36	-1.69	0.092	0.47	-0.17	0.86	0.92
AT7867	inhibitor of AKT1/2/3 and S6K	AKT1;AKT2;AKT3;RPS6KB2	-1.72	0.087	0.36	0.5	0.61	0.84	2.32	0.021	0.09
SB-431542	inhibitor of the transforming growth factor beta type 1 receptor	TGFBR1	-1.71	0.087	0.36	-2.41	0.016	0.26	1.92	0.056	0.18
BRD-K44224150	product of diversity oriented synthesis		-1.71	0.089	0.36	-1.41	0.16	0.53	-0.84	0.4	0.64
pyrazolanthrone	inhibitor of Jun N-terminal kinase (JNK) 1/2/3	MAPK10;MAPK8;MAPK9	1.7	0.09	0.36	-2.89	0.0039	0.16	1.7	0.09	0.25
BRD-K58730230	stapled helical peptide		1.7	0.091	0.36	-0.05	0.96	0.98	0.78	0.44	0.66
RG-108	inhibitor of DNA methyltransferase	DNMT1	-1.69	0.091	0.36	-0.82	0.41	0.74	0.59	0.55	0.74
SCH-79797	antagonist of proteinase-activated receptor 1 (PAR1)	F2R	-1.69	0.091	0.36	-0.27	0.79	0.92	0.28	0.78	0.88
triptolide	natural product; inhibitor of RNA polymerase II		-1.69	0.091	0.36	-1.44	0.15	0.52	3.07	0.0022	0.019
NSC632839	inhibitor of ubiquitin isopeptidase	USP13;USP5	-1.68	0.093	0.36	-0.55	0.59	0.83	1.72	0.086	0.24
selumetinib:GDC-0941 (4:1 mol/mol)	inhibitor of MEK1 and MEK2;inhibitor of PI3K kinase activity	MAP2K1;MAP2K2;PIK3CA;PIK3CB;PIK3CD;PIK3CG	1.68	0.093	0.36	-0.45	0.65	0.87	0.8	0.42	0.66
968	inhibitor of glutaminase	GLS	1.68	0.094	0.36	-0.38	0.7	0.87	-0.66	0.51	0.72
navitoclax:gemcitabine (1:1 mol/mol)	inhibitor of BCL2, BCL-xL, and BCL-W;inhibitor of DNA replication; inhibitor of ribonucleotide reductase, thymidylate synthetase, and cytidine monophosphate (UMP-CMP) kinase	BCL2;BCL2L1;BCL2L2;CMPK1;RRM1;TYMS	-1.68	0.094	0.36	-2.02	0.044	0.36	3.6	0.00034	0.0051
bendamustine	DNA alkylator		-1.66	0.097	0.37	-1.42	0.15	0.52	4.08	5.1e-05	0.0015
doxorubicin	inhibitor of topoisomerase II	TOP2A	-1.66	0.098	0.37	-2.3	0.022	0.32	5.55	4e-08	5.4e-06
BRD-K49290616	product of diversity oriented synthesis		-1.63	0.1	0.39	0.52	0.6	0.84	0.43	0.67	0.81
GSK461364	inhibitor of polo-like kinase 1 (PLK1)	PLK1	-1.62	0.1	0.39	-0.35	0.73	0.88	-0.41	0.68	0.83
navitoclax:sorafenib (1:1 mol/mol)	inhibitor of BCL2, BCL-xL, and BCL-W;inhibitor of BRAF, CRAF, and VEGFR2	BCL2;BCL2L1;BCL2L2;BRAF;FLT3;KDR;RAF1	-1.65	0.1	0.37	-2.64	0.0086	0.2	4.06	5.3e-05	0.0015
ABT-737	inhibitor of BCL2, BCL-xL, and BCL-W	BCL2;BCL2L1;BCL2L2	-1.59	0.11	0.39	-1.5	0.13	0.49	3.99	7.3e-05	0.0018
BRD-K03536150	activator of BAX	BAX	-1.61	0.11	0.39	-1.52	0.13	0.49	0.28	0.78	0.88
GSK525762A	inhibitor of bromodomain (BRD) and extra-C terminal domain (BET) proteins	BRD2;BRD3;BRD4	1.61	0.11	0.39	0.76	0.45	0.76	0.79	0.43	0.66
LRRK2-IN-1	inhibitor of leucine-rich repeat kinase 2; inhibitor of doublecortin-like kinase	DCLK1;LRRK2	-1.6	0.11	0.39	-0.7	0.48	0.78	1.43	0.15	0.34
NSC95397	inhibitor of cell division cycle 25 phosphatase (CDC25)	CDC25A;CDC25B;CDC25C	-1.58	0.11	0.39	-1.88	0.06	0.38	3.34	0.00089	0.01
PLX-4720	inhibitor of BRAF	BRAF	1.59	0.11	0.39	-1.56	0.12	0.49	1.7	0.09	0.25
R428	inhibitor of the tyrosine-protein kinase receptor UFO	AXL	-1.6	0.11	0.39	-0.24	0.81	0.94	1.97	0.049	0.17
alvocidib	inhibitor of cyclin-dependent kinases	CDK1;CDK2;CDK4;CDK6	-1.61	0.11	0.39	-0.18	0.86	0.96	1.41	0.16	0.34
betulinic acid	natural product; inhibitor of specificity protein 1 transcription factor in cells		1.59	0.11	0.39	0.14	0.89	0.97	-0.7	0.49	0.7
linsitinib	inhibitor of insulin-like growth factor 1 receptor and insulin receptor	IGF1R;INSR	-1.59	0.11	0.39	-1.09	0.28	0.64	1.35	0.18	0.37
tretinoin	agonist of retinoid acid receptors	RARA;RARB;RARG	-1.58	0.11	0.39	-0.04	0.97	0.98	2.43	0.015	0.073
vorinostat:navitoclax (4:1 mol/mol)	inhibitor of HDAC1, HDAC2, HDAC3, HDAC6, and HDAC8;inhibitor of BCL2, BCL-xL, and BCL-W	HDAC1;HDAC2;HDAC3;HDAC6;HDAC8;BCL2;BCL2L1;BCL2L2	-1.61	0.11	0.39	-2.2	0.028	0.36	3.29	0.001	0.011
BRD-K33514849	screening hit		-1.59	0.12	0.39	0.44	0.66	0.87	2.37	0.02	0.09
JQ-1:navitoclax (2:1 mol/mol)	inhibitor of bromodomain (BRD) and extra-C terminal domain (BET) proteins;inhibitor of BCL2, BCL-xL, and BCL-W	BRDT;BCL2;BCL2L1;BCL2L2	-1.55	0.12	0.41	-1.05	0.29	0.66	2.79	0.0054	0.037
PL-DI	dimer of piperlongumine; inducer of ROS		-1.55	0.12	0.41	-0.86	0.39	0.72	3.24	0.0013	0.012
YL54	stapled helical peptide		-1.54	0.12	0.41	-2.44	0.015	0.26	1.5	0.13	0.32
saracatinib	inhibitor of SRC and ABL1	ABL1;SRC	1.54	0.12	0.41	0.34	0.73	0.89	0.13	0.9	0.94
BRD-K29313308	inhibitor of HDAC3	HDAC3	-1.5	0.13	0.43	-1.04	0.3	0.66	2.91	0.0037	0.028
BRD-K71935468	inducer of ROS		-1.5	0.13	0.43	-1.17	0.24	0.62	1.46	0.14	0.34
ETP-46464	inhibitor of serine/threonine-protein kinase ATR	ATM;ATR	1.51	0.13	0.43	-0.18	0.86	0.96	-0.47	0.64	0.8
carboplatin:etoposide (40:17 mol/mol)	inducer of DNA damage;inhibitor of topoisomerase II	TOP2A	-1.5	0.13	0.43	-2.27	0.024	0.33	5.24	2e-07	1.9e-05
gemcitabine	inhibitor of DNA replication; inhibitor of ribonucleotide reductase, thymidylate synthetase, and cytidine monophosphate (UMP-CMP) kinase	CMPK1;RRM1;TYMS	-1.53	0.13	0.42	-1.3	0.19	0.57	2.61	0.0092	0.05
BRD-A02303741:navitoclax (2:1 mol/mol)	inhibitor of histone methyltransferases;inhibitor of BCL2, BCL-xL, and BCL-W	DOT1L;BCL2;BCL2L1;BCL2L2	-1.48	0.14	0.44	-0.97	0.33	0.67	3.48	0.00053	0.0071
BRD-K24690302	inhibitor of HDAC1	HDAC1	-1.47	0.14	0.44	-0.97	0.33	0.67	1.63	0.1	0.27
BRD-K34222889	analog of the natural product piperlongumine		-1.48	0.14	0.44	-1.58	0.11	0.49	3.83	0.00014	0.0028
GMX-1778	inhibitor of nicotinamide phosphoribosyltransferase	NAMPT	-1.47	0.14	0.44	-2.45	0.015	0.26	0.65	0.51	0.72
LY-2157299	inhibitor of the transforming growth factor beta type 1 receptor	TGFBR1	-1.5	0.14	0.44	0.37	0.71	0.88	0.36	0.72	0.85
PAC-1	activator of procaspase-3	CASP3	-1.49	0.14	0.44	-3	0.0028	0.15	3.78	0.00017	0.0032
STF-31	inhibitor of nicotinamide phosphoribosyltransferase	NAMPT	-1.47	0.14	0.44	-1.18	0.24	0.62	-0.83	0.41	0.64
BRD-K70511574	inhibitor of polo-like kinase 1 (PLK1)	PLK1	-1.45	0.15	0.45	-0.24	0.81	0.94	1.22	0.22	0.43
SKI-II	inhibitor of sphingosine kinase 1	SPHK1	-1.42	0.15	0.47	-0.74	0.46	0.77	0.41	0.68	0.83
afatinib	inhibitor of EGFR and HER2	EGFR;ERBB2	1.44	0.15	0.46	-0.97	0.33	0.67	0.24	0.81	0.9
AC55649	agonist of retinoic acid receptor beta	RARB	-1.39	0.16	0.48	0.55	0.58	0.83	0.47	0.64	0.8
CCT036477	inhibitor of WNT signaling by blocking beta-catenin transcription		-1.39	0.16	0.48	-1.62	0.11	0.49	1.81	0.07	0.21
cediranib	inhibitor of VEGFRs	FLT1;FLT4;KDR	1.42	0.16	0.47	-0.89	0.37	0.71	0.33	0.74	0.86
serdemetan:SCH-529074 (1:1 mol/mol)	inhibitor of MDM2;activator of mutant p53	MDM2;TP53	-1.41	0.16	0.48	-1.66	0.097	0.49	5.35	1.2e-07	1.3e-05
simvastatin	inhibitor of HMG-CoA reductase	HMGCR	1.4	0.16	0.48	0.41	0.68	0.87	1.25	0.21	0.41
BRD-K45681478	product of diversity oriented synthesis; screening hit		-1.38	0.17	0.49	-0.82	0.41	0.74	1.61	0.11	0.28
BRD-K66453893	product of diversity oriented synthesis		-1.37	0.17	0.5	-0.02	0.98	0.99	1.16	0.25	0.46
SR8278	antagonist of Rev-ErbAalpha	NR1D1	1.37	0.17	0.5	0.4	0.69	0.87	0.4	0.69	0.83
gossypol	inhibitor of lactate dehydrogenase; inhibitor of BCL2 family members	BCL2;BCL2L1;LDHA;LDHB;LDHC	-1.39	0.17	0.48	-1.98	0.048	0.36	0.82	0.42	0.65
AT13387	inhibitor of HSP90	HSP90AA1	-1.35	0.18	0.5	-1.6	0.11	0.49	2.68	0.0077	0.045
BRD-K09344309	screening hit		-1.35	0.18	0.5	0.04	0.97	0.98	0.8	0.43	0.66
BRD-K48334597	product of diversity oriented synthesis		-1.35	0.18	0.5	1.11	0.27	0.64	0.95	0.34	0.58
IPR-456	inhibitor of the interaction of urokinase receptor with binding partners	PLAUR	1.35	0.18	0.5	-0.04	0.97	0.98	-0.32	0.75	0.87
bosutinib	inhibitor of SRC and ABL1	ABL1;SRC	-1.33	0.18	0.51	0.55	0.58	0.83	0.83	0.41	0.65
dexamethasone	agonist of glucocorticoid receptor	NR3C1	1.36	0.18	0.5	-0.41	0.68	0.87	1.33	0.18	0.38
BRD-M00053801	inhibitor of BCL2	BCL2	-1.3	0.19	0.53	-0.28	0.78	0.92	0.62	0.53	0.73
JQ-1:MK-0752 (1:1 mol/mol)	inhibitor of bromodomain (BRD) and extra-C terminal domain (BET) proteins;inhibitor of gamma-secretase	BRDT;APH1A;NCSTN;PSEN1;PSENEN	-1.32	0.19	0.52	0.29	0.77	0.92	1.41	0.16	0.34
alisertib:navitoclax (2:1 mol/mol)	inhibitor of aurora kinases A and B;inhibitor of BCL2, BCL-xL, and BCL-W	AURKA;AURKB;BCL2;BCL2L1;BCL2L2	-1.32	0.19	0.52	-1.87	0.061	0.38	3.75	0.00019	0.0035
A-804598	inhibitor of purinergic receptor P2X	P2RX7	-1.29	0.2	0.53	0.17	0.86	0.96	1.52	0.13	0.32
ABT-199	inhibitor of BCL2	BCL2	-1.28	0.2	0.53	-1.55	0.12	0.49	3.43	0.00067	0.0084
CIL41	screening hit		-1.29	0.2	0.53	-0.77	0.44	0.76	-0.18	0.85	0.92
O-6-benzylguanine	inhibitor of O(6)-alkylguanine DNA alkyltransferases	MGMT	1.29	0.2	0.53	2.87	0.0044	0.17	-0.46	0.65	0.8
cimetidine	inhibitor of histidine receptor H2	HRH2	-1.3	0.2	0.53	0.8	0.42	0.74	0.29	0.77	0.87
fluorouracil	pyrimidine analog; inhibitor of thymidylate synthase	TYMS	1.29	0.2	0.53	-1.09	0.27	0.64	3.33	0.0009	0.01
selumetinib:PLX-4032 (8:1 mol/mol)	inhibitor of MEK1 and MEK2;inhibitor of BRAF	MAP2K1;MAP2K2;BRAF	1.3	0.2	0.53	-0.64	0.52	0.8	2.25	0.025	0.1
PF-4800567 hydrochloride	inhibitor of casein kinase isoforms delta and epsilon	CSNK1D;CSNK1E	1.27	0.21	0.54	-0.6	0.55	0.81	-0.67	0.5	0.71
compound 1B	screening hit		-1.24	0.21	0.56	1.59	0.11	0.49	0.7	0.48	0.7
BRD-K07442505	stapled helical peptide activating BAX	BAX	-1.22	0.22	0.57	1.19	0.23	0.62	-1.41	0.16	0.35
ISOX	inhibitor of HDAC6	HDAC6	-1.22	0.22	0.57	-0.99	0.32	0.67	0.91	0.36	0.61
[truncated: 336 more rows]

## Sheet: S9
Table S9. Differential therapeutic sensitivity from GDSC data
[truncated: 267 more rows]

## Sheet: S10
Table S10. Differential therapeutic sensitivity from PRISM primary screen data
[truncated: 4,687 more rows]

[truncated: 1 more sheets: S11]
